# Supplementary material
Source: PubMed Central journal article supplement (PMC7306207)

**Antimalarial drugs with whole protein 6vw1 grid, Table S1**

| Entry Name           | docking score | glide gscore |
|----------------------|---------------|--------------|
| 6vw1.1               |               |              |
| Conformer3D_CID_6178 | -5.129        | -5.129       |
| Conformer3D_CID_5467 | -4.869        | -4.869       |
| Conformer3D_CID_6882 | -4.786        | -4.786       |
| Conformer3D_CID_4069 | -4.599        | -4.599       |
| Conformer3D_CID_2165 | -4.2          | -4.2         |
| Conformer3D_CID_1226 | -4.05         | -4.05        |
| Conformer3D_CID_4465 | -3.866        | -3.866       |
| Conformer3D_CID_2719 | -3.828        | -3.828       |
| Conformer3D_CID_6395 | -3.828        | -3.828       |
| Conformer3D_CID_4993 | -3.682        | -3.682       |
| Conformer3D_CID_3739 | -3.636        | -3.636       |
| Conformer3D_CID_4908 | -3.63         | -3.63        |
| Conformer3D_CID_3085 | -3.62         | -3.62        |
| Conformer3D_CID_3034 | -3.038        | -3.038       |
| Conformer3D_CID_7498 | -3.024        | -3.024       |

**Antimalarial drugs with whole protein 6y84 grid, Table S2**

| Entry Name           | docking score | glide gscore |
|----------------------|---------------|--------------|
| 6y84.1               |               |              |
| Conformer3D_CID_5467 | -6.831        | -6.831       |
| Conformer3D_CID_1226 | -6.296        | -6.296       |
| Conformer3D_CID_2165 | -5.545        | -5.545       |
| Conformer3D_CID_4908 | -5.498        | -5.498       |
| Conformer3D_CID_4993 | -5.403        | -5.403       |
| Conformer3D_CID_4465 | -5.005        | -5.005       |
| Conformer3D_CID_2719 | -4.831        | -4.831       |
| Conformer3D_CID_6395 | -4.831        | -4.831       |
| Conformer3D_CID_3739 | -4.765        | -4.765       |
| Conformer3D_CID_4069 | -4.521        | -4.521       |
| Conformer3D_CID_3034 | -4.491        | -4.491       |
| Conformer3D_CID_6882 | -4.162        | -4.162       |
| Conformer3D_CID_3085 | -3.871        | -3.871       |
| Conformer3D_CID_7498 | -3.727        | -3.727       |
| Conformer3D_CID_6178 | -1.737        | -1.737       |

**Antimalarial drugs with residue protein 6vw1 grid, Table S3**

| Entry Name           | docking score | glide gscore |
|----------------------|---------------|--------------|
| 6vw1.1               |               |              |
| Conformer3D_CID_4993 | -5.063        | -5.063       |
| Conformer3D_CID_5467 | -3.749        | -3.749       |
| Conformer3D_CID_3739 | -3.656        | -3.656       |
| Conformer3D_CID_4465 | -3.466        | -3.466       |
| Conformer3D_CID_2165 | -3.211        | -3.211       |
| Conformer3D_CID_4908 | -3.111        | -3.111       |
| Conformer3D_CID_1226 | -3.018        | -3.018       |
| Conformer3D_CID_4069 | -3.014        | -3.014       |
| Conformer3D_CID_2719 | -2.908        | -2.908       |
| Conformer3D_CID_6395 | -2.908        | -2.908       |
| Conformer3D_CID_3034 | -2.793        | -2.793       |
| Conformer3D_CID_6882 | -2.769        | -2.769       |
| Conformer3D_CID_7498 | -2.394        | -2.394       |
| Conformer3D_CID_6178 | -2.328        | -2.328       |
| Conformer3D_CID_3085 | 0.356         | 0.356        |

## Antimalarial drugs with residue protein 6y84 grid, Table S4

| Entry Name           | docking score | glide gscore |
|----------------------|---------------|--------------|
| 6y84.1.1             |               |              |
| Conformer3D_CID_5467 | -5.782        | -5.782       |
| Conformer3D_CID_4465 | -5.558        | -5.558       |
| Conformer3D_CID_1226 | -4.968        | -4.968       |
| Conformer3D_CID_2165 | -4.814        | -4.814       |
| Conformer3D_CID_3034 | -4.238        | -4.238       |
| Conformer3D_CID_4908 | -4.165        | -4.165       |
| Conformer3D_CID_6178 | -4.127        | -4.127       |
| Conformer3D_CID_2719 | -4.111        | -4.111       |
| Conformer3D_CID_6395 | -4.111        | -4.111       |
| Conformer3D_CID_3739 | -3.992        | -3.992       |
| Conformer3D_CID_6882 | -3.947        | -3.947       |
| Conformer3D_CID_4069 | -3.94         | -3.94        |
| Conformer3D_CID_4993 | -3.634        | -3.634       |
| Conformer3D_CID_7498 | -3.386        | -3.386       |
| Conformer3D_CID_3085 | -2.545        | -2.545       |

## FDA approved drugs with 6vw1, Table S5

| FORMULA        | DRUGBANK_ID | GENERIC_NAME                 | docking score | glide gscore |
|----------------|-------------|------------------------------|---------------|--------------|
| C25H48N6O10    | DB12615     | Plazomicin                   | -9.035        | -9.935       |
| C25H48N6O10    | DB12615     | Plazomicin                   | -9.168        | -9.66        |
| C29H40N4O7     | DB12455     | Omadacycline                 | -7.241        | -9.178       |
| C25H48N6O10    | DB12615     | Plazomicin                   | -5.948        | -8.514       |
| C25H48N6O10    | DB12615     | Plazomicin                   | -7.112        | -8.194       |
| C22H42N4O8S2   | DB11190     | Pantethine                   | -8.188        | -8.188       |
| C32H35N5O5     | DB09272     | Eluxadoline                  | -7.408        | -8.166       |
| C17H22I3N3O8   | DB11705     | Iomeprol                     | -8.076        | -8.076       |
| C6H8CaO8       | DB13962     | Calcium saccharate           | -7.951        | -7.951       |
| C37H48I6N6O18  | DB09487     | Iotrolan                     | -6.759        | -7.653       |
| C50H71N13O12   | DB11842     | Angiotensin II               | -6.841        | -7.491       |
| C11H16N8O8     | DB14075     | Imidurea                     | -6.843        | -7.482       |
| C18H24I3N3O9   | DB09134     | Ioversol                     | -7.378        | -7.378       |
| C11H8Na4O8P2   | DB09332     | Kappadione                   | -4.711        | -7.335       |
| C25H48N6O10    | DB12615     | Plazomicin                   | -4.584        | -7.141       |
| C32H35N5O5     | DB09272     | Eluxadoline                  | -6.364        | -7.092       |
| C38H73N21O10S2 | DB12865     | Etelcalcetide                | -4.827        | -7.036       |
| C11H16N8O8     | DB14075     | Imidurea                     | -5.148        | -7.015       |
| C17H22I3N3O8   | DB08947     | Iopamidol                    | -6.973        | -6.973       |
| C6H12O6        | DB13178     | Inositol                     | -6.93         | -6.93        |
| C36H70O19      | DB11602     | Hydroxyethyl cellulose       | -6.912        | -6.912       |
| C18H24I3N3O8   | DB09156     | Iopromide                    | -6.801        | -6.801       |
| C20H25N7O6     | DB11256     | Levemefolic acid             | -4.551        | -6.783       |
| C20H23N7O7     | DB11596     | Levoleucovorin               | -6.684        | -6.684       |
| C49H62N10O16S3 | DB09142     | Sincalide                    | -4.521        | -6.642       |
| C25H48N6O10    | DB12615     | Plazomicin                   | -5.248        | -6.621       |
| CH6O7P2Tc      | DB09139     | Technetium Tc-99m oxidronate | -5.571        | -6.615       |
| C6H12O7        | DB13180     | Gluconic Acid                | -6.601        | -6.601       |
| C32H50O13      | DB12434     | Steviolbioside               | -6.577        | -6.581       |
| C12H22FeO14    | DB14488     | Ferrous gluconate            | -6.569        | -6.569       |
| C12H22O14Zn    | DB11248     | Zinc gluconate               | -6.569        | -6.569       |
| C12H22CuO14    | DB11246     | Copper gluconate             | -6.552        | -6.552       |
| C12H22MnO14    | DB11141     | Manganese gluconate          | -6.551        | -6.551       |
| C12H22CaO14    | DB11126     | Calcium gluconate            | -6.551        | -6.551       |
| C6H11KO7       | DB13620     | Potassium gluconate          | -6.532        | -6.532       |

|                 |         |                                  |        |        |
|-----------------|---------|----------------------------------|--------|--------|
| C43H67N11O12S2  | DB09059 | Atosiban                         | -6.475 | -6.475 |
| CH6O7P2         | DB14159 | Oxidronic acid                   | -5.424 | -6.468 |
| C15H30N2O5      | DB12839 | Pegvaliase                       | -6.418 | -6.418 |
| C18H33CrO21     | DB14528 | Chromium gluconate               | -6.416 | -6.416 |
| C12H26MgO16     | DB13749 | Magnesium gluconate              | -6.374 | -6.374 |
| C12H29Fe5Na2O23 | DB09146 | Iron saccharate                  | -6.369 | -6.369 |
| C18H37N5O8      | DB13270 | Dibekacin                        | -4.82  | -6.362 |
| C30H44N2O10     | DB13265 | Hexobendine                      | -4.047 | -6.339 |
| C23H36N2O4      | DB09039 | Eliglustat                       | -6.221 | -6.227 |
| C11H20O10       | DB12767 | Gaxilose                         | -6.195 | -6.195 |
| C14H23N3O10     | DB14007 | Pentetic acid                    | -5.378 | -6.194 |
| C18H24I3N3O8    | DB09135 | Ioxilan                          | -6.181 | -6.181 |
| C23H30N12O8S2   | DB09050 | Ceftolozane                      | -6.154 | -6.155 |
| Al2H2Mg2O12Si3  | DB14116 | Silodrate                        | -6.114 | -6.114 |
| C50H71N13O12    | DB11842 | Angiotensin II                   | -5.428 | -6.111 |
| CH6O7P2Tc       | DB09139 | Technetium Tc-99m oxidronate     | -5.972 | -6.083 |
| C14H23N3O10     | DB14007 | Pentetic acid                    | -3.866 | -6.042 |
| C29H40N4O7      | DB12455 | Omadacycline                     | -3.656 | -6.036 |
| C19H20Br2N6O4S  | DB08932 | Macitentan                       | -5.831 | -6.03  |
| C50H68N14O10    | DB11653 | Bremelanotide                    | -5.218 | -6.029 |
| C25H30N4O9S2    | DB12127 | Sultamicillin                    | -5.287 | -6.008 |
| C12H16O7        | DB11217 | Arbutin                          | -6.006 | -6.006 |
| C11H16N8O8      | DB14075 | Imidurea                         | -5.707 | -5.993 |
| C32H43N5O5      | DB11274 | Dihydro-alpha-ergocryptine       | -3.56  | -5.989 |
| C26H25F3N6O5    | DB09335 | Alatrofloxacin                   | -5.791 | -5.927 |
| C49H62N10O16S3  | DB09142 | Sincalide                        | -5.909 | -5.926 |
| C22H25ClO7      | DB11827 | Ertugliflozin                    | -5.913 | -5.913 |
| C16H22N6O4      | DB09421 | Protirelin                       | -5.194 | -5.87  |
| C14H20InN3O10   | DB09425 | Indium In-111 pentetate          | -5.04  | -5.856 |
| C19H23N4O6PS    | DB11748 | Benfotiamine                     | -4.611 | -5.853 |
| O7P2Tc          | DB09165 | Technetium Tc-99m pyrophosphate  | -3.516 | -5.853 |
| C11H12O8P2      | DB14650 | Menadiol diphosphate             | -4.496 | -5.839 |
| C11H8Na4O8P2    | DB09332 | Kappadione                       | -4.496 | -5.839 |
| C24H33Cl2NO5    | DB09082 | Vilanterol                       | -5.833 | -5.838 |
| C4H4Na2O6       | DB13707 | Sodium tartrate                  | -5.836 | -5.836 |
| C11H18N2O9      | DB12362 | Diaminopropanol tetraacetic acid | -3.582 | -5.829 |
| C32H35N5O5      | DB09272 | Eluxadoline                      | -4.491 | -5.795 |
| C12H16O7        | DB14109 | alpha-Arbutin                    | -5.785 | -5.785 |
| C14H26N4O11P2   | DB12153 | Citicoline                       | -5.78  | -5.78  |
| C11H12O8P2      | DB14650 | Menadiol diphosphate             | -3.136 | -5.76  |
| C28H32O15       | DB08995 | Diosmin                          | -5.75  | -5.75  |
| C50H68N14O10    | DB11653 | Bremelanotide                    | -5.19  | -5.74  |
| C46H65N13O12S2  | DB14642 | Lypressin                        | -5.545 | -5.738 |
| C31H41N5O5      | DB11273 | Dihydroergocornine               | -3.296 | -5.729 |
| C26H25F3N6O5    | DB09335 | Alatrofloxacin                   | -3.735 | -5.717 |
| C22H32N2O2      | DB12313 | Dopexamine                       | -5.711 | -5.711 |
| C18H37N5O8      | DB13270 | Dibekacin                        | -4.206 | -5.687 |
| C25H48N6O10     | DB12615 | Plazomicin                       | -3.532 | -5.679 |
| C26H27N3O5S     | DB09183 | Dasabuvir                        | -5.637 | -5.647 |
| C6H11FO5        | DB09502 | Fludeoxyglucose F-18             | -5.643 | -5.645 |
| C23H28N8O4      | DB12483 | Copanlisib                       | -2.884 | -5.607 |
| CH6O7P2         | DB14159 | Oxidronic acid                   | -5.494 | -5.605 |
| C6H11FeNO7      | DB09501 | Ferric ammonium citrate          | -5.588 | -5.588 |
| C8H14N4O7       | DB14173 | Diazolidinylurea                 | -5.576 | -5.576 |
| C8H14CaO10      | DB11168 | Calcium threonate                | -5.554 | -5.554 |
| C14H19BCl2N2O4  | DB09570 | Ixazomib                         | -5.549 | -5.549 |
| C27H26ClF3N6O3  | DB12095 | Telotristat ethyl                | -5.104 | -5.539 |
| C46H65N13O12S2  | DB14642 | Lypressin                        | -4.777 | -5.534 |
| C10H15N3O5      | DB12783 | Benserazide                      | -4.38  | -5.531 |
| C16H22N6O4      | DB09421 | Protirelin                       | -4.897 | -5.53  |
| C20H28I3N3O9    | DB12407 | Iobitridol                       | -5.491 | -5.491 |
| C27H26ClF3N6O3  | DB12095 | Telotristat ethyl                | -3.213 | -5.483 |
| C8H10N6         | DB12945 | Dihydralazine                    | -4.994 | -5.451 |

|                |         |                                  |        |        |
|----------------|---------|----------------------------------|--------|--------|
| C18H26N2O5Tc   | DB09164 | Technetium Tc-99m disofenin      | -3.902 | -5.444 |
| C42H62O16      | DB13751 | Glycyrrhizic acid                | -5.435 | -5.438 |
| C10H14O3       | DB13583 | Mephenesin                       | -5.432 | -5.432 |
| C18H23NO3      | DB08941 | Isoxsuprine                      | -5.38  | -5.415 |
| C15H17N3O6S    | DB14082 | Betiatide                        | -5.41  | -5.41  |
| C49H55N9O7     | DB11574 | Elbasvir                         | -4.063 | -5.353 |
| Al2H2MgO9Si2   | DB13595 | Almasilate                       | -5.339 | -5.339 |
| C12H16BNO5S    | DB12107 | Vaborbactam                      | -5.32  | -5.321 |
| C6H6N2O3       | DB09055 | Acipimox                         | -5.279 | -5.282 |
| C23H28N8O4     | DB12483 | Copanlisib                       | -4.845 | -5.276 |
| C3H7Na2O6P     | DB09561 | Sodium glycerophosphate          | -5.168 | -5.275 |
| C12H10O14Zn3   | DB11154 | Zinc citrate                     | -5.264 | -5.264 |
| C6H5Na3O7      | DB09154 | Sodium citrate                   | -5.264 | -5.264 |
| C3H7CaO6P      | DB11264 | Calcium glycerophosphate         | -4.184 | -5.262 |
| C22H28O5       | DB12952 | Methylprednisone                 | -5.251 | -5.251 |
| C18H24N2O5     | DB09477 | Enalaprilat                      | -4.247 | -5.223 |
| C15H16O9       | DB13155 | Esculin                          | -5.202 | -5.213 |
| C3H7CaO6P      | DB11264 | Calcium glycerophosphate         | -5.095 | -5.2   |
| O7P2Tc         | DB09165 | Technetium Tc-99m pyrophosphate  | -4.962 | -5.195 |
| C14H20InN3O10  | DB09425 | Indium In-111 pentetate          | -3.01  | -5.186 |
| C15H14O6       | DB14086 | Cianidanol                       | -5.178 | -5.178 |
| C28H27N3O3     | DB13931 | Netarsudil                       | -5.141 | -5.152 |
| C27H31FN4O8    | DB12329 | Eravacycline                     | -3.886 | -5.123 |
| C11H12O8P2     | DB14650 | Menadiol diphosphate             | -3.684 | -5.102 |
| C11H8Na4O8P2   | DB09332 | Kappadione                       | -3.684 | -5.102 |
| CH6O8P2Tc      | DB09138 | Technetium Tc-99m medronate      | -4.572 | -5.099 |
| CH6O6P2        | DB14078 | Medronic acid                    | -4.572 | -5.098 |
| C14H23N3O10    | DB14007 | Pentetic acid                    | -4.853 | -5.091 |
| C14H20InN3O10  | DB09425 | Indium In-111 pentetate          | -4.853 | -5.091 |
| C16H14O3       | DB08981 | Fenbufen                         | -5.089 | -5.089 |
| C32H35N5O5     | DB09272 | Eluxadoline                      | -3.656 | -5.087 |
| C20H41N5O7     | DB13274 | Micronomicin                     | -3.463 | -5.074 |
| C18H24Fe4O42P6 | DB13995 | Ferric pyrophosphate citrate     | -5.065 | -5.065 |
| C12H10Ca3O14   | DB11093 | Calcium Citrate                  | -5.065 | -5.065 |
| C12H8BiK5O14   | DB09275 | Bismuth subcitrate potassium     | -5.065 | -5.065 |
| C11H18N2O9     | DB12362 | Diaminopropanol tetraacetic acid | -4.962 | -5.051 |
| C10H14N2O4     | DB13253 | Proxibarbal                      | -4.897 | -5.042 |
| C21H27FO5      | DB09378 | Fluprednisolone                  | -5.038 | -5.038 |
| C17H26N4O3S2   | DB08966 | Fursultiamine                    | -4.937 | -5.029 |
| C49H55N9O7     | DB11574 | Elbasvir                         | -3.864 | -5.008 |
| C14H11FN2OS    | DB09151 | Flutemetamol (18F)               | -2.782 | -5.004 |
| C24H29N3O8     | DB12035 | Sarecycline                      | -3.886 | -4.972 |
| C17H14BrN3O2S  | DB11560 | Lesinurad                        | -4.971 | -4.971 |
| C27H31FN4O8    | DB12329 | Eravacycline                     | -4.827 | -4.96  |
| C15H18N2O9     | DB09144 | Uridine triacetate               | -4.935 | -4.938 |
| C6H12O6        | DB11735 | Galactose                        | -4.932 | -4.932 |
| C18H12ClF3N4O4 | DB11943 | Delafloxacin                     | -4.886 | -4.93  |
| C12H14MgO12    | DB14484 | Magnesium ascorbate              | -4.921 | -4.921 |
| C20H41N5O7     | DB13274 | Micronomicin                     | -3.181 | -4.915 |
| C7H11N3O6S     | DB09060 | Avibactam                        | -4.906 | -4.906 |
| CH6O8P2Tc      | DB09138 | Technetium Tc-99m medronate      | -4.584 | -4.898 |
| CH6O6P2        | DB14078 | Medronic acid                    | -4.583 | -4.897 |
| C11H18N2O9     | DB12362 | Diaminopropanol tetraacetic acid | -3.464 | -4.894 |
| C20H22O8       | DB11263 | Polydatin                        | -4.888 | -4.888 |
| C10H14N2Na2O8  | DB14600 | Edetate disodium anhydrous       | -2.663 | -4.877 |
| C20H41N5O7     | DB13274 | Micronomicin                     | -3.055 | -4.872 |
| C9H11ClN4O2    | DB09343 | Tipiracil                        | -4.063 | -4.871 |
| C30H26N2O13    | DB11184 | Oftasceine                       | -3.582 | -4.854 |
| C15H16O9       | DB13155 | Esculin                          | -2.505 | -4.854 |
| C11H18N2O9     | DB12362 | Diaminopropanol tetraacetic acid | -2.645 | -4.835 |
| C17H16FN6O6P   | DB09042 | Tedizolid phosphate              | -4.747 | -4.832 |
| C20H17F3N2O4   | DB08976 | Floctafenine                     | -2.623 | -4.832 |
| C18H37N5O8     | DB13270 | Dibekacin                        | -3.253 | -4.819 |

|               |         |                                   |        |        |
|---------------|---------|-----------------------------------|--------|--------|
| C5H10O5       | DB09419 | Xylose                            | -4.81  | -4.81  |
| C29H40N4O7    | DB12455 | Omadacycline                      | -3.548 | -4.805 |
| C30H29CIN6O3  | DB11828 | Neratinib                         | -3.899 | -4.801 |
| C26H27N3O5S   | DB09183 | Dasabuvir                         | -2.379 | -4.798 |
| C18H32Fe4O31  | DB14520 | Tetraferic tricitrate decahydrate | -4.787 | -4.787 |
| C36H72NO8P    | DB11283 | DL-dimyristoylphosphatidylcholine | -4.786 | -4.786 |
| C9H10O4       | DB11323 | Glycol salicylate                 | -4.781 | -4.782 |
| C8H8O3        | DB13218 | Mandelic acid                     | -4.779 | -4.779 |
| C23H26FN6O9P  | DB12010 | Fostamatinib                      | -3.422 | -4.776 |
| C6H5Li3O7     | DB14507 | Lithium citrate                   | -4.762 | -4.762 |
| C6H5K3O7      | DB09125 | Potassium Citrate                 | -4.762 | -4.762 |
| C14H12O4      | DB11221 | Dioxybenzone                      | -2.86  | -4.758 |
| C21H29O8P     | DB14631 | Prednisolone phosphate            | -4.684 | -4.75  |
| C26H25F3N6O5  | DB09335 | Alatrofloxacin                    | -3.677 | -4.75  |
| C23H27ClO7    | DB09038 | Empagliflozin                     | -4.74  | -4.74  |
| C14H12O4      | DB11221 | Dioxybenzone                      | -4.676 | -4.738 |
| C33H54O5      | DB14001 | alpha-Tocopherol succinate        | -4.727 | -4.727 |
| C2H7N5        | DB13100 | Biguanide                         | -4.713 | -4.716 |
| C14H27N3O2    | DB13247 | Pramiracetam                      | -4.71  | -4.714 |
| C4H9Al2CIN4O7 | DB11205 | Alcloxa                           | -4.434 | -4.707 |
| C13H21NO3     | DB13139 | Levosalbutamol                    | -4.686 | -4.686 |
| C21H30O4S     | DB09091 | Tixocortol                        | -2.191 | -4.686 |
| C3H7Na2O6P    | DB09561 | Sodium glycerophosphate           | -3.614 | -4.681 |
| C52H78N10O17  | DB13156 | Inosine pranobex                  | -4.677 | -4.677 |
| C22H29FN3O9P  | DB08934 | Sofosbuvir                        | -4.665 | -4.668 |
| C10H15N3O5    | DB12783 | Benserazide                       | -4.576 | -4.668 |
| C23H23ClFNO5  | DB09101 | Elvitegravir                      | -3.705 | -4.661 |
| C5H8FNO2      | DB13146 | Fluciclovine (18F)                | -4.658 | -4.658 |
| C4H6N4O3      | DB11100 | Allantoin                         | -2.995 | -4.651 |
| C23H26FN6O9P  | DB12010 | Fostamatinib                      | -4.577 | -4.641 |
| C24H38N2O4    | DB11915 | Valbenazine                       | -4.377 | -4.625 |
| C24H38N2O4    | DB11915 | Valbenazine                       | -2.178 | -4.615 |
| C22H18FN7O    | DB09054 | Idelalisib                        | -4.587 | -4.608 |
| C23H28N8O4    | DB12483 | Copanlisib                        | -4.188 | -4.603 |
| C26H30N6O3    | DB13074 | Macimorelin                       | -3.599 | -4.596 |
| C13H21N5O4    | DB09092 | Xanthinol                         | -3.348 | -4.59  |
| C32H30F5N3O5  | DB11979 | Elagolix                          | -3.849 | -4.581 |
| C10H10N2O     | DB12243 | Edaravone                         | -4.227 | -4.578 |
| C16H22I2N6O4S | DB09546 | Iobenguane sulfate I-123          | -4.574 | -4.574 |
| C21H26N2O5    | DB09080 | Olodaterol                        | -1.947 | -4.571 |
| C10H12ClNO4   | DB14656 | Chlorphenesin carbamate           | -4.563 | -4.563 |
| C8H17FeN3O6S2 | DB11197 | Ferrous cysteine glycinate        | -2.344 | -4.563 |
| C24H29NO5     | DB09292 | Sacubitril                        | -2.339 | -4.553 |
| C19H12O8      | DB11994 | Diacerein                         | -4.526 | -4.526 |
| C27H31FN4O8   | DB12329 | Eravacycline                      | -2.4   | -4.521 |
| C21H31O8P     | DB14542 | Hydrocortisone phosphate          | -3.183 | -4.516 |
| C26H34O8      | DB14644 | Methylprednisolone hemisuccinate  | -4.509 | -4.51  |
| C10H8N2O2S2   | DB11327 | Dipyrrithione                     | -4.49  | -4.49  |
| C50H68N14O10  | DB11653 | Bremelanotide                     | -3.867 | -4.488 |
| C7H6O3        | DB11268 | Protocatechualdehyde              | -4.376 | -4.483 |
| C6H8N2        | DB14141 | p-Phenylenediamine                | -3.494 | -4.479 |
| C22H28O5      | DB09383 | Meprednisone                      | -4.449 | -4.449 |
| C17H20N2O5S   | DB13337 | Pheneticillin                     | -4.448 | -4.448 |
| C21H20O6      | DB11672 | Curcumin                          | -3.211 | -4.444 |
| C10H9N5O      | DB11336 | Kinetin                           | -4.417 | -4.438 |
| C21H27N       | DB09016 | Butriptyline                      | -4.434 | -4.435 |
| C37H48I6N6O18 | DB09487 | Iotrolan                          | -4.285 | -4.433 |
| C14H14N4O4    | DB12954 | Terizidone                        | -4.431 | -4.431 |
| C19H23N4O6PS  | DB11748 | Benfotiamine                      | -3.165 | -4.431 |
| C4H9Al2CIN4O7 | DB11205 | Alcloxa                           | -2.779 | -4.43  |
| C15H10Cl2N4O6 | DB11632 | Opicapone                         | -3.469 | -4.429 |
| C20H25N7O6    | DB11256 | Levomefolic acid                  | -4.412 | -4.428 |
| C32H43N5O5    | DB11275 | Epicriptine                       | -2.007 | -4.428 |

|                 |         |                                    |        |        |
|-----------------|---------|------------------------------------|--------|--------|
| C10H12CaN2Na2O8 | DB14598 | Edetate calcium disodium anhydrous | -2.212 | -4.426 |
| C29H40N4O7      | DB12455 | Omadacycline                       | -4.298 | -4.424 |
| C18H37N5O8      | DB13270 | Dibekacin                          | -4.188 | -4.414 |
| C13H21N5O4      | DB09092 | Xanthinol                          | -4.327 | -4.405 |
| C14H10O3        | DB11157 | Anthralin                          | -4.396 | -4.396 |
| C12H14N2O7      | DB14486 | Niacinamide ascorbate              | -4.39  | -4.39  |
| C12H14O12Zn     | DB14485 | Zinc ascorbate                     | -4.39  | -4.39  |
| C30H53N3O6      | DB09026 | Aliskiren                          | -4.375 | -4.38  |
| C16H16N4O       | DB14753 | Hydroxystilbamidine                | -4.375 | -4.375 |
| C35H38N4O6      | DB09238 | Manidipine                         | -3.088 | -4.368 |
| C11H12O8P2      | DB14650 | Menadiol diphosphate               | -4.225 | -4.363 |
| C11H8Na4O8P2    | DB09332 | Kappadione                         | -4.225 | -4.363 |
| C15H10Cl2N4O6   | DB11632 | Opicapone                          | -4.194 | -4.349 |
| C4H6N4O3        | DB11100 | Allantoin                          | -4.077 | -4.347 |
| C6H10O4         | DB09401 | Isosorbide                         | -4.346 | -4.346 |
| AlO4P           | DB14517 | Aluminium phosphate                | -2.734 | -4.342 |
| HNa2O4P         | DB14502 | Sodium phosphate, dibasic          | -2.734 | -4.342 |
| CaH5O6P         | DB14481 | Calcium phosphate dihydrate        | -2.734 | -4.342 |
| Ca3O8P2         | DB11348 | Calcium Phosphate                  | -2.734 | -4.342 |
| H2NaO4P         | DB09449 | Sodium phosphate, monobasic        | -2.734 | -4.342 |
| HK2O4P          | DB09414 | Dipotassium phosphate              | -2.734 | -4.342 |
| H2KO4P          | DB09413 | Monopotassium phosphate            | -2.734 | -4.342 |
| H3O4P           | DB09394 | Phosphoric acid                    | -2.734 | -4.342 |
| C10H14N2O4      | DB13253 | Proxibarbal                        | -3.025 | -4.341 |
| C26H30N6O3      | DB13074 | Macimorelin                        | -4.216 | -4.338 |
| C20H17F3N2O4    | DB08976 | Floctafenine                       | -4.32  | -4.335 |
| C19H17F6N7O     | DB13874 | Enasidenib                         | -4.329 | -4.329 |
| C49H55N9O7      | DB11574 | Elbasvir                           | -2.897 | -4.308 |
| C24H21I6N5O8    | DB09313 | Ioxaglic acid                      | -4.306 | -4.306 |
| C12H10Mg3O14    | DB11110 | Magnesium citrate                  | -4.303 | -4.303 |
| C24H29N7O2      | DB09073 | Palbociclib                        | -2.381 | -4.292 |
| C21H31O8P       | DB14542 | Hydrocortisone phosphate           | -4.224 | -4.29  |
| C4H6O4S2        | DB14089 | Dimercaptosuccinic acid            | -4.28  | -4.28  |
| C27H41NO8       | DB11660 | Latanoprostene Bunod               | -4.276 | -4.276 |
| C32H30F5N3O5    | DB11979 | Elagolix                           | -4.054 | -4.262 |
| C9H12ClN5O      | DB09242 | Moxonidine                         | -2.935 | -4.258 |
| C22H23ClN2O8    | DB09093 | Chlortetracycline                  | -4.118 | -4.254 |
| C8H18O10S2      | DB12097 | Mannitol busulfan                  | -4.244 | -4.244 |
| C7H7BrN4O2      | DB14018 | Bromotheophylline                  | -4.204 | -4.235 |
| C25H36O6        | DB14540 | Hydrocortisone butyrate            | -4.234 | -4.234 |
| C18H21ClN2      | DB08936 | Chlorcyclizine                     | -3.759 | -4.227 |
| C11H14ClN5      | DB14763 | Cycloguanil                        | -3.774 | -4.224 |
| C31H35F6N4O5P   | DB14019 | Fosnetupitant                      | -4.197 | -4.218 |
| C32H34N4O6      | DB11691 | Naldemedine                        | -3.692 | -4.216 |
| C15H14N2O2      | DB14575 | Eslicarbazepine                    | -4.211 | -4.211 |
| C21H21N3O3      | DB12924 | Ozenoxacin                         | -3.598 | -4.195 |
| C16H22N6O4      | DB09421 | Protirelin                         | -3.548 | -4.192 |
| C21H26F3N5      | DB09195 | Lorpirazole                        | -4.075 | -4.189 |
| Mg2O8Si3        | DB09281 | Magnesium trisilicate              | -4.188 | -4.188 |
| C12H17NO3       | DB13278 | Bucetin                            | -4.184 | -4.184 |
| C32H34N4O6      | DB11691 | Naldemedine                        | -2.295 | -4.182 |
| C21H22N6O       | DB11978 | Glasdegib                          | -3.143 | -4.175 |
| C22H30FO8P      | DB14669 | Betamethasone phosphate            | -2.827 | -4.167 |
| C26H27F3N2O6    | DB11712 | Tezacaftor                         | -4.158 | -4.158 |
| C20H4Cl4I4O5    | DB11182 | Rose bengal free acid              | -4.15  | -4.156 |
| C21H19ClN4O4    | DB09078 | Lenvatinib                         | -4.15  | -4.15  |
| C20H33N3O3S     | DB09097 | Quinagolide                        | -4.107 | -4.145 |
| C7H7BrN4O2      | DB14018 | Bromotheophylline                  | -2.363 | -4.14  |
| C22H28F2O4      | DB09095 | Difluocortolone                    | -4.139 | -4.139 |
| C11H16N2O5      | DB13421 | Edoxudine                          | -4.136 | -4.137 |
| C14H12O6S       | DB11185 | Sulisobenzone                      | -4.082 | -4.122 |
| C22H30FO8P      | DB14669 | Betamethasone phosphate            | -4.057 | -4.122 |
| C10H10N2O       | DB12243 | Edaravone                          | -3.323 | -4.116 |

|                |         |                              |        |        |
|----------------|---------|------------------------------|--------|--------|
| C14H23N3O10    | DB14007 | Pentetic acid                | -2.267 | -4.106 |
| C14H20InN3O10  | DB09425 | Indium In-111 pentetate      | -2.267 | -4.106 |
| C15H10Cl2N4O6  | DB11632 | Opicapone                    | -1.856 | -4.098 |
| C25H34O8       | DB14545 | Hydrocortisone succinate     | -4.094 | -4.095 |
| C22H24FN3O2    | DB12867 | Benperidol                   | -4.071 | -4.088 |
| C18H12ClF3N4O4 | DB11943 | Delafloxacin                 | -2.523 | -4.088 |
| C25H26F6N2O2   | DB09291 | Rolapitant                   | -3.992 | -4.074 |
| C6H10CaO6      | DB13231 | Calcium lactate              | -4.072 | -4.073 |
| C3H5KO3        | DB09483 | Potassium lactate            | -4.072 | -4.073 |
| C7H6O3         | DB11268 | Protocatechualdehyde         | -2.995 | -4.061 |
| C27H36O7       | DB14643 | Methylprednisolone aceponate | -4.052 | -4.052 |
| C23H30N2O4     | DB09209 | Pholcodine                   | -3.95  | -4.052 |
| C34H53NO11     | DB09049 | Naloxegol                    | -1.502 | -4.049 |
| C18H37N5O8     | DB13270 | Dibekacin                    | -2.294 | -4.046 |
| C12H14FeO12    | DB14490 | Ferrous ascorbate            | -4.038 | -4.038 |
| C6H7NaO6       | DB14482 | Sodium ascorbate             | -4.038 | -4.038 |
| C30H26N2O13    | DB11184 | Oftasceine                   | -3.948 | -4.037 |
| C12H18O3       | DB11299 | Vanillyl butyl ether         | -4.033 | -4.033 |
| C10H16N2O      | DB11738 | Rilmenidine                  | -4.02  | -4.021 |
| C12H18IN       | DB09480 | Iofetamine I-123             | -4.019 | -4.019 |
| C23H23ClFNO5   | DB09101 | Elvitegravir                 | -3.875 | -4.012 |
| C17H16FN6O6P   | DB09042 | Tedizolid phosphate          | -2.816 | -4.009 |
| C18H23NO3      | DB08941 | Isoxsuprine                  | -2.316 | -4.009 |
| C13H10O3       | DB11071 | Phenyl salicylate            | -3.977 | -4.001 |
| C16H17N7O2S    | DB11817 | Baricitinib                  | -4     | -4     |
| C20H26O3       | DB13952 | Estradiol acetate            | -3.997 | -3.997 |
| C10H10N2O      | DB12243 | Edaravone                    | -2.46  | -3.993 |
| C34H53NO11     | DB09049 | Naloxegol                    | -2.744 | -3.99  |
| C10H15NO2      | DB11610 | Oxilofrine                   | -3.969 | -3.98  |
| C2H8N2         | DB14189 | Ethylenediamine              | -3.273 | -3.973 |
| C13H10N2O3S    | DB11115 | Ensulizole                   | -2.676 | -3.952 |
| C23H30N8O      | DB11730 | Ribociclib                   | -2.547 | -3.948 |
| C21H30O4S      | DB09091 | Tixocortol                   | -3.933 | -3.942 |
| C22H23ClN2O8   | DB09093 | Chlortetracycline            | -1.65  | -3.942 |
| C22H24FN3O2    | DB12867 | Benperidol                   | -1.795 | -3.931 |
| C17H26N4O3S2   | DB08966 | Fursultiamine                | -2.782 | -3.928 |
| C43H49N2O6S2   | DB09374 | Indocyanine green acid form  | -3.924 | -3.924 |
| C12H6N2O8SSr2  | DB09267 | Strontium ranelate           | -3.918 | -3.918 |
| C20H15NO4      | DB09219 | Bisoxatin                    | -3.909 | -3.914 |
| C18H29NO3      | DB09351 | Levobetaxolol                | -3.909 | -3.911 |
| C17H11ClF3N5O3 | DB12301 | Doravirine                   | -3.908 | -3.908 |
| C17H16N2O3     | DB09119 | Eslicarbazepine acetate      | -3.908 | -3.908 |
| C23H30N2O4     | DB09209 | Pholcodine                   | -2.307 | -3.908 |
| C24H31FO6      | DB14657 | Paramethasone acetate        | -3.906 | -3.906 |
| C11H13NO4      | DB11102 | N-acetyltirosine             | -3.904 | -3.904 |
| C32H35N5O5     | DB09272 | Eluxadoline                  | -2.624 | -3.897 |
| C11H10FNO2S    | DB13228 | Flosequinan                  | -3.891 | -3.891 |
| H2O3S2         | DB09499 | Thiosulfuric acid            | -3.889 | -3.889 |
| C8H10O2        | DB11304 | Phenoxyethanol               | -3.887 | -3.887 |
| C21H27ClO5     | DB00873 | Loteprednol                  | -3.886 | -3.886 |
| C20H19F2N3O5   | DB08930 | Dolutegravir                 | -1.905 | -3.874 |
| C13H19NO3      | DB09185 | Viloxazine                   | -3.85  | -3.873 |
| C20H19FN4O4    | DB09047 | Finafloxacin                 | -2.207 | -3.869 |
| C21H29O8P      | DB14631 | Prednisolone phosphate       | -2.495 | -3.83  |
| C40H52F4N6O9S  | DB12026 | Voxilaprevir                 | -3.825 | -3.828 |
| C19H23N4O6PS   | DB11748 | Benfotiamine                 | -1.504 | -3.828 |
| C21H29N6O5P    | DB09299 | Tenofovir alafenamide        | -3.824 | -3.824 |
| C40H43N7O7S    | DB09297 | Paritaprevir                 | -1.106 | -3.822 |
| C21H20O6       | DB11672 | Curcumin                     | -3.47  | -3.814 |
| C27H34N4O      | DB12492 | Piritramide                  | -2.102 | -3.814 |
| C32H43N5O5     | DB11274 | Dihydro-alpha-ergocryptine   | -3.77  | -3.813 |
| C15H19BrN2O5Tc | DB09137 | Technetium Tc-99m mebrofenin | -2.264 | -3.806 |
| C12H11I3N2O5   | DB13444 | Ioxitalamic acid             | -3.803 | -3.803 |

|                |         |                                 |        |        |
|----------------|---------|---------------------------------|--------|--------|
| C18H24N2O5     | DB09477 | Enalaprilat                     | -3.672 | -3.799 |
| C23H32O6       | DB14539 | Hydrocortisone acetate          | -3.798 | -3.798 |
| C10H14Cl2NO2PS | DB11768 | Zytron                          | -3.796 | -3.796 |
| C3H8O3         | DB09462 | Glycerin                        | -3.796 | -3.796 |
| C14H12O2       | DB14020 | Benzoin                         | -3.792 | -3.792 |
| C10H14N2Na2O8  | DB14600 | Edetate disodium anhydrous      | -3.776 | -3.79  |
| C8H10N6        | DB12945 | Dihydralazine                   | -3.415 | -3.788 |
| C24H29N3O8     | DB12035 | Sarecycline                     | -3.675 | -3.786 |
| C21H21N3O3     | DB12924 | Ozenoxacin                      | -3.427 | -3.786 |
| C32H34N4O6     | DB11691 | Naldemedine                     | -1.376 | -3.785 |
| C7H8O2         | DB11359 | Guaiacol                        | -3.782 | -3.783 |
| C24H29N7O2     | DB09073 | Palbociclib                     | -3.375 | -3.782 |
| C17H15FN6O3    | DB14569 | Tedizolid                       | -3.779 | -3.779 |
| CCaN2          | DB09116 | Calcium carbimide               | -3.779 | -3.779 |
| C49H55N9O7     | DB11574 | Elbasvir                        | -2.529 | -3.772 |
| C27H26ClF3N6O3 | DB12095 | Telotristat ethyl               | -1.5   | -3.771 |
| C22H23NO4S2    | DB13166 | Zofenopril                      | -3.768 | -3.768 |
| C30H44N2O10    | DB13265 | Hexobendine                     | -1.236 | -3.767 |
| C17H15BrF2N4O3 | DB11967 | Binimetinib                     | -3.754 | -3.763 |
| C12H14CaO12    | DB14483 | Calcium ascorbate               | -3.76  | -3.76  |
| C18H18ClN3S    | DB13256 | Clothiapine                     | -3.719 | -3.753 |
| C10H7Cl2NO     | DB13306 | Chlorquinaldol                  | -2.958 | -3.747 |
| C22H29FO4      | DB08971 | Fluocortolone                   | -3.745 | -3.745 |
| C16H12Cl2N2O2  | DB13872 | Lormetazepam                    | -3.745 | -3.745 |
| C17H15BrF2N4O3 | DB11967 | Binimetinib                     | -1.236 | -3.744 |
| C28H40O7       | DB14543 | Hydrocortisone probutate        | -3.743 | -3.743 |
| C29H39ClN7O2P  | DB12267 | Brigatinib                      | -3.725 | -3.739 |
| C21H18F3N3O5   | DB11799 | Bictegravir                     | -1.768 | -3.736 |
| C21H28O3       | DB11636 | Nomegestrol                     | -3.729 | -3.729 |
| C21H34O5       | DB09081 | Idebenone                       | -3.725 | -3.725 |
| O7P2Tc         | DB09165 | Technetium Tc-99m pyrophosphate | -3.021 | -3.722 |
| C14H11FN2OS    | DB09151 | Flutemetamol (18F)              | -3.705 | -3.719 |
| C14H14O2       | DB14120 | Phenylethyl resorcinol          | -3.71  | -3.712 |
| HNaO3S         | DB14015 | Sodium bisulfite                | -3.711 | -3.711 |
| C10H15NO2      | DB11610 | Oxilofrine                      | -1.361 | -3.706 |
| C24H25ClFN5O2  | DB11963 | Dacomitinib                     | -3.597 | -3.705 |
| C21H28O2       | DB09070 | Tibolone                        | -3.695 | -3.695 |
| C22H27F3O4S    | DB13867 | Fluticasone                     | -3.691 | -3.691 |
| C25H30N4O9S2   | DB12127 | Sultamicillin                   | -3.481 | -3.689 |
| C21H21N3O3     | DB12924 | Ozenoxacin                      | -1.982 | -3.689 |
| C26H38O6       | DB14544 | Hydrocortisone valerate         | -3.686 | -3.686 |
| C19H31N        | DB12728 | Fenpropidin                     | -3.681 | -3.681 |
| C18H24NO4      | DB11315 | Methscopolamine                 | -3.675 | -3.675 |
| C21H19ClFN4O4S | DB11629 | Laropiprant                     | -3.673 | -3.675 |
| C21H22F2N6O2   | DB14723 | Larotrectinib                   | -3.668 | -3.668 |
| C9H11ClN4O2    | DB09343 | Tipiracil                       | -3.489 | -3.664 |
| C16H19NO2      | DB13219 | Medifoxamine                    | -3.305 | -3.664 |
| C8H8O3         | DB09543 | Methyl salicylate               | -2.49  | -3.663 |
| C9H8N2         | DB12537 | Benzodiazepine                  | -3.66  | -3.66  |
| C20H41N5O7     | DB13274 | Micronomicin                    | -3.474 | -3.657 |
| C7H6BFO2       | DB09041 | Tavaborole                      | -3.656 | -3.656 |
| C10H15N        | DB09571 | Levmetamfetamine                | -3.643 | -3.644 |
| C16H22N4O      | DB11235 | Thonzylamine                    | -3.633 | -3.637 |
| BH3O3          | DB11326 | Boric acid                      | -3.63  | -3.63  |
| C22H18FN7O     | DB09054 | Idelalisib                      | -1.629 | -3.626 |
| C19H20Br2N6O4S | DB08932 | Macitentan                      | -2.883 | -3.625 |
| C20H22O3       | DB09495 | Avobenzzone                     | -2.353 | -3.617 |
| C21H45N3       | DB08958 | Hexetidine                      | -3.215 | -3.608 |
| C34H53NO11     | DB09049 | Naloxegol                       | -3.511 | -3.597 |
| C21H18ClNO6    | DB13783 | Acemetacin                      | -3.593 | -3.593 |
| C8H8O2         | DB09269 | Phenylacetic acid               | -3.589 | -3.59  |
| C19H23N4O6PS   | DB11748 | Benfotiamine                    | -3.408 | -3.587 |
| C9H19NO4       | DB09357 | Dexpanthenol                    | -3.583 | -3.583 |



|                |         |                                 |        |        |
|----------------|---------|---------------------------------|--------|--------|
| C3H6BrNO4      | DB13960 | Bronopol                        | -3.581 | -3.581 |
| C19H18N6O6S2   | DB14725 | Cefamandole nafate              | -3.566 | -3.566 |
| C22H17F2N5OS   | DB11633 | Isavuconazole                   | -3.559 | -3.559 |
| C29H32Cl2N2O5S | DB13125 | Lusutrombopag                   | -3.555 | -3.555 |
| C8H9FN2O3      | DB09256 | Tegafur                         | -1.753 | -3.55  |
| C19H22F3N5O2S  | DB12015 | Alpelisib                       | -3.549 | -3.549 |
| C10H14N2O2     | DB14754 | Solriamfetol                    | -3.531 | -3.549 |
| C12H13I3N2O2   | DB09333 | Iopodic acid                    | -3.467 | -3.549 |
| C20H23NO       | DB13114 | Amitriptylinoxide               | -3.547 | -3.547 |
| C16H14O3       | DB09214 | Dexketoprofen                   | -3.542 | -3.543 |
| C32H35N5O5     | DB09272 | Eluxadoline                     | -2.248 | -3.541 |
| C14H18O3       | DB09118 | Stiripentol                     | -3.534 | -3.534 |
| B4Na2O7        | DB14505 | Sodium borate                   | -3.526 | -3.526 |
| C13H9Cl3N2O    | DB11155 | Triclocarban                    | -3.523 | -3.523 |
| C12H24N2O4S2   | DB11164 | Bicisate                        | -2.765 | -3.518 |
| C22H22N6O5S2   | DB13682 | Cefpirome                       | -3.515 | -3.515 |
| C20H26O2       | DB09371 | Norethynodrel                   | -3.507 | -3.507 |
| C25H31NO6      | DB11921 | Deflazacort                     | -3.502 | -3.503 |
| C10H13NO4S2    | DB13284 | Meticrane                       | -3.5   | -3.501 |
| C15H19BrN2O5Tc | DB09137 | Technetium Tc-99m mebrofenin    | -3.453 | -3.499 |
| C29H33FO9S     | DB14703 | Dexamethasone metasulfobenzoate | -3.494 | -3.494 |
| C16H10N2O8S2   | DB11577 | Indigotindisulfonic Acid        | -3.49  | -3.49  |
| C28H41N3O3     | DB12532 | Oxetacaine                      | -3.42  | -3.488 |
| C20H19FN4O4    | DB09047 | Finaxofloxacin                  | -1.117 | -3.487 |
| C16H28N2O2     | DB13288 | Tromantadine                    | -1.241 | -3.485 |
| C38H50N6O9S    | DB11575 | Grazoprevir                     | -3.473 | -3.48  |
| C22H27ClFN7O4S | DB11718 | Encorafenib                     | -3.042 | -3.476 |
| C29H50O2       | DB14476 | DL-alpha-Tocopherol             | -3.474 | -3.474 |
| C24H23FN4O3    | DB09074 | Olaparib                        | -3.472 | -3.472 |
| C26H32N4O4S    | DB11362 | Selexipag                       | -3.464 | -3.469 |
| C19H21NS       | DB09167 | Dosulepin                       | -3.462 | -3.466 |
| C32H43N5O5     | DB11275 | Epicriptine                     | -1.712 | -3.451 |
| ClKO4          | DB09418 | Potassium perchlorate           | -3.442 | -3.442 |
| C6H6O2         | DB11085 | Resorcinol                      | -3.425 | -3.428 |
| C35H46ClN5O9S  | DB11586 | Asunaprevir                     | -0.701 | -3.419 |
| C30H29ClN6O3   | DB11828 | Neratinib                       | -3.233 | -3.415 |
| C38H50N6O9S    | DB11575 | Grazoprevir                     | -0.695 | -3.413 |
| C21H18F3N3O5   | DB11799 | Bictegravir                     | -3.059 | -3.412 |
| C6H6O2         | DB09526 | Hydroquinone                    | -3.408 | -3.408 |
| C20H19FN4O4    | DB09047 | Finaxofloxacin                  | -3.206 | -3.408 |
| C6H10N2O2      | DB09210 | Piracetam                       | -3.397 | -3.397 |
| C20H25NO2      | DB09123 | Dienogest                       | -3.393 | -3.393 |
| C10H22O3       | DB13163 | Terpin hydrate                  | -3.379 | -3.379 |
| C7H11N3O3      | DB12834 | Secnidazole                     | -3.369 | -3.369 |
| C32H43N5O5     | DB11274 | Dihydro-alpha-ergocryptine      | -1.631 | -3.369 |
| C49H55N9O7     | DB11574 | Elbasvir                        | -1.963 | -3.354 |
| C21H26N2O5     | DB09080 | Olodaterol                      | -3.341 | -3.348 |
| C6H5ClO        | DB13154 | Parachlorophenol                | -3.336 | -3.338 |
| C14H12O3       | DB14176 | Benzylparaben                   | -3.304 | -3.328 |
| C10H8BrNO      | DB13222 | Tilbroquinol                    | -3.121 | -3.328 |
| C27H18InN3O3   | DB09473 | Indium In-111 oxyquinoline      | -3.299 | -3.317 |
| C21H30O2       | DB09061 | Cannabidiol                     | -3.309 | -3.309 |
| C21H26FNO3     | DB09148 | Florbetaben (18F)               | -3.305 | -3.309 |
| C27H33N2O7S2   | DB13967 | Patent Blue                     | -3.093 | -3.309 |
| C24H34O5       | DB11622 | Dehydrocholic acid              | -3.304 | -3.308 |
| C20H41N5O7     | DB13274 | Micronomicin                    | -1.788 | -3.306 |
| C17H27NO3      | DB09345 | Pramocaine                      | -2.883 | -3.304 |
| C17H12I2O3     | DB13277 | Benziodarone                    | -0.762 | -3.304 |
| C30H29ClN6O3   | DB11828 | Neratinib                       | -1.486 | -3.3   |
| C27H34N4O      | DB12492 | Piritramide                     | -1.09  | -3.3   |
| C21H24O4       | DB14083 | Bisphenol A diglycidyl ether    | -3.29  | -3.29  |
| C31H41N5O5     | DB11273 | Dihydroergocormine              | -3.243 | -3.287 |
| C27H26ClF3N6O3 | DB12095 | Telotristat ethyl               | -2.847 | -3.285 |

|               |         |                                 |        |        |
|---------------|---------|---------------------------------|--------|--------|
| C13H16ClNO    | DB11823 | Esketamine                      | -2.204 | -3.285 |
| C21H27NO2     | DB08954 | Ifenprodil                      | -3.283 | -3.283 |
| C29H35F3N2O3  | DB12371 | Siponimod                       | -0.681 | -3.283 |
| C14H19N3O     | DB13216 | Oxolamine                       | -1.172 | -3.269 |
| C22H26ClFO4   | DB13158 | Clobetasone                     | -3.268 | -3.268 |
| C14H12O6S     | DB11185 | Sulisobenzone                   | -1.642 | -3.267 |
| C12H13FN4O5   | DB09327 | Tegafur-uracil                  | -1.47  | -3.267 |
| C12H13I3N2O2  | DB09333 | Iopodic acid                    | -2.047 | -3.26  |
| C20H19FN4O4   | DB09047 | Finafloxacin                    | -2.333 | -3.255 |
| C8H8O3        | DB14212 | Methylparaben                   | -3.228 | -3.252 |
| C23H32O2      | DB09124 | Medrogestone                    | -3.25  | -3.25  |
| C12H13I3N2O3  | DB09403 | Iocetamic acid                  | -3.248 | -3.249 |
| C20H19F2N3O5  | DB08930 | Dolutegravir                    | -2.96  | -3.247 |
| C19H15F3N2O3  | DB12020 | Tecovirimat                     | -3.245 | -3.245 |
| C27H32F2N8    | DB12001 | Abemaciclib                     | -3.04  | -3.242 |
| C24H29NO5     | DB09292 | Sacubitril                      | -3.226 | -3.24  |
| C19H27NO3     | DB12161 | Deutetrabenazine                | -3.185 | -3.235 |
| C4H7NaO3      | DB09072 | Sodium oxybate                  | -3.229 | -3.231 |
| C10H7Cl2NO    | DB13306 | Chlorquinaldol                  | -3.047 | -3.228 |
| C24H38N2O4    | DB11915 | Valbenazine                     | -2.55  | -3.225 |
| C14H10O4      | DB09096 | Benzoyl peroxide                | -3.219 | -3.219 |
| C22H30O4      | DB09015 | Canrenoic acid                  | -3.213 | -3.218 |
| C11H14ClN5    | DB14763 | Cycloguanil                     | -1.188 | -3.214 |
| C13H13N3      | DB14191 | Diphenylguanidine               | -3.211 | -3.211 |
| C5H7N3        | DB11640 | Amifampridine                   | -3.206 | -3.208 |
| C12H19NO      | DB11587 | Etafedrine                      | -1.715 | -3.2   |
| H32Mo7N6O28   | DB11128 | Ammonium molybdate              | -3.191 | -3.193 |
| H3N           | DB09326 | Ammonia N-13                    | -3.191 | -3.193 |
| C24H25ClFN5O2 | DB11963 | Dacomitinib                     | -1.437 | -3.187 |
| AlO4P         | DB14517 | Aluminium phosphate             | -3.145 | -3.186 |
| HNa2O4P       | DB14502 | Sodium phosphate, dibasic       | -3.145 | -3.186 |
| CaH5O6P       | DB14481 | Calcium phosphate dihydrate     | -3.145 | -3.186 |
| Ca3O8P2       | DB11348 | Calcium Phosphate               | -3.145 | -3.186 |
| H2NaO4P       | DB09449 | Sodium phosphate, monobasic     | -3.145 | -3.186 |
| HK2O4P        | DB09414 | Dipotassium phosphate           | -3.145 | -3.186 |
| H2KO4P        | DB09413 | Monopotassium phosphate         | -3.145 | -3.186 |
| H3O4P         | DB09394 | Phosphoric acid                 | -3.145 | -3.186 |
| C11H14O3      | DB14084 | Butylparaben                    | -3.164 | -3.181 |
| C28H37N3O3    | DB11591 | Bilastine                       | -1.425 | -3.174 |
| C14H7Cl2NO3   | DB11644 | Tafamidis                       | -3.172 | -3.172 |
| C18H22F2N4O   | DB09040 | Efinaconazole                   | -1.393 | -3.17  |
| C2H8N2        | DB14189 | Ethylenediamine                 | -2.951 | -3.168 |
| C29H44N8O3    | DB12141 | Gilteritinib                    | -0.487 | -3.167 |
| C26H38O4      | DB14677 | Gestonorone caproate            | -3.159 | -3.159 |
| C16H25NO3     | DB09205 | Moxisylyte                      | -3.137 | -3.157 |
| C12H8N2O4Zn   | DB11175 | Zinc picolinate                 | -3.14  | -3.15  |
| C17H15NO5     | DB13657 | Benorilate                      | -3.148 | -3.148 |
| C28H27N3O3    | DB13931 | Netarsudil                      | -0.785 | -3.147 |
| C4H4FeO4      | DB14489 | Ferrous succinate               | -3.145 | -3.145 |
| C21H30NO4     | DB09300 | Butylscopolamine                | -3.145 | -3.145 |
| C12H19NO      | DB11587 | Etafedrine                      | -3.087 | -3.138 |
| C29H39ClN7O2P | DB12267 | Brigatinib                      | -0.889 | -3.137 |
| C12H24N2O4S2  | DB11164 | Bicisate                        | -2.896 | -3.136 |
| C23H36N2O4    | DB09039 | Eliglustat                      | -0.452 | -3.136 |
| C7H7NO2       | DB13882 | Methyl nicotinate               | -3.133 | -3.133 |
| C9H13NO       | DB09352 | Hydroxyamphetamine              | -3.131 | -3.131 |
| C35H43N5O4    | DB11855 | Revefenacin                     | -1.28  | -3.119 |
| C22H28ClFO4   | DB11750 | Clobetasol                      | -3.116 | -3.116 |
| C5H4ClNO2     | DB09257 | Gimeracil                       | -3.114 | -3.114 |
| C32H34N4O6    | DB11691 | Naldemedine                     | -0.489 | -3.114 |
| C10H14CaO6    | DB13800 | Calcium levulinate              | -3.111 | -3.113 |
| C15H18N2      | DB14195 | 4-(Isopropylamino)diphenylamine | -2.84  | -3.112 |
| C8H9N3O4      | DB09220 | Nicorandil                      | -3.111 | -3.111 |

|               |         |                                               |        |        |
|---------------|---------|-----------------------------------------------|--------|--------|
| C3H4O2        | DB09348 | Propiolactone                                 | -3.104 | -3.104 |
| C21H21N3O3    | DB12924 | Ozenoxacin                                    | -1.057 | -3.104 |
| C45H50ClN7O7S | DB11581 | Venetoclax                                    | -3.09  | -3.101 |
| C18H12CrN3O6  | DB14529 | Chromium nicotinate                           | -0.65  | -3.098 |
| CK2O3         | DB13977 | Potassium carbonate                           | -2.981 | -3.092 |
| CNa2O3        | DB09460 | Sodium carbonate                              | -2.981 | -3.092 |
| CLi2O3        | DB14509 | Lithium carbonate                             | -2.98  | -3.092 |
| CH24Al2Mg6O24 | DB13322 | Hydrotalcite                                  | -2.98  | -3.092 |
| CHKO3         | DB11098 | Potassium bicarbonate                         | -2.98  | -3.092 |
| CMgO3         | DB09481 | Magnesium carbonate                           | -2.98  | -3.092 |
| C7H16N4O4S2   | DB12473 | Taurolidine                                   | -2.518 | -3.092 |
| C12H13FN4O5   | DB09327 | Tegafur-uracil                                | -3.06  | -3.089 |
| C8H8O3        | DB09543 | Methyl salicylate                             | -3.001 | -3.089 |
| C17H19NO      | DB12293 | Nefopam                                       | -1.621 | -3.087 |
| C49H54N8O8    | DB11613 | Velpatasvir                                   | -0.824 | -3.084 |
| C44H32N4O4    | DB11630 | Temoporfin                                    | -3.079 | -3.079 |
| C6H12O3       | DB09117 | Paraldehyde                                   | -3.078 | -3.078 |
| C10H8BrNO     | DB13222 | Tilbroquinol                                  | -2.352 | -3.077 |
| C7H6Cl2O      | DB13269 | Dichlorobenzyl alcohol                        | -3.076 | -3.076 |
| C11H17NO      | DB11278 | DL-Methylephedrine                            | -1.926 | -3.074 |
| C9H7NO        | DB11145 | Oxyquinoline                                  | -0.993 | -3.072 |
| C27H18InN3O3  | DB09473 | Indium In-111 oxyquinoline                    | -0.993 | -3.072 |
| C18H12Cl2N2O  | DB12792 | Boscalid                                      | -3.068 | -3.068 |
| C40H50N8O6    | DB09102 | Daclatasvir                                   | -1.786 | -3.068 |
| C22H17ClN6O   | DB11952 | Duvelisib                                     | -1.069 | -3.066 |
| C17H28N2O     | DB08987 | Etidocaine                                    | -0.891 | -3.064 |
| C19H18FN3O    | DB12332 | Rucaparib                                     | -0.876 | -3.062 |
| C24H29Cl2FO5  | DB08973 | Fluclorolone acetone                          | -3.06  | -3.06  |
| C22H29NO5     | DB09089 | Trimebutine                                   | -2.812 | -3.05  |
| C10H12O4      | DB12328 | Cantharidin                                   | -3.049 | -3.049 |
| C26H33NO6     | DB09236 | Lacidipine                                    | -3.036 | -3.036 |
| C19H30O5      | DB09350 | Piperonyl butoxide                            | -3.032 | -3.032 |
| C20H34O5      | DB12789 | Dinoprost                                     | -3.026 | -3.029 |
| C24H18F2N2O5  | DB09280 | Lumacaftor                                    | -3.028 | -3.028 |
| C17H15ClO4    | DB13873 | Fenofibric acid                               | -3.027 | -3.027 |
| C23H17FN6O    | DB11791 | Capmatinib                                    | -3.022 | -3.027 |
| FNa2O3P       | DB09484 | Sodium fluorophosphate                        | -0.928 | -3.026 |
| C18H21N3O     | DB13225 | Dibenzepin                                    | -0.811 | -3.022 |
| C18H27NO3     | DB09120 | Zucapsaicin                                   | -3.02  | -3.02  |
| C9H5I2NO      | DB09115 | Diiodohydroxyquinoline                        | -2.441 | -3.02  |
| C12H11I3N2O4  | DB09346 | Metrizoic acid                                | -3.016 | -3.016 |
| CK2O3         | DB13977 | Potassium carbonate                           | -1.962 | -3.006 |
| CNa2O3        | DB09460 | Sodium carbonate                              | -1.962 | -3.006 |
| CLi2O3        | DB14509 | Lithium carbonate                             | -1.962 | -3.006 |
| CH24Al2Mg6O24 | DB13322 | Hydrotalcite                                  | -1.962 | -3.006 |
| CHKO3         | DB11098 | Potassium bicarbonate                         | -1.962 | -3.006 |
| CMgO3         | DB09481 | Magnesium carbonate                           | -1.962 | -3.006 |
| C25H26F6N2O2  | DB09291 | Rolapitant                                    | -1.79  | -3.005 |
| C8H9FN2O3     | DB09256 | Tegafur                                       | -2.969 | -2.998 |
| C23H28O6      | DB14646 | Prednisone acetate                            | -2.994 | -2.994 |
| C14H27NaO5S   | DB13157 | Sodium lauryl sulfoacetate                    | -2.99  | -2.99  |
| C40H52N2O4    | DB13947 | Testosterone enantate benzilic acid hydrazone | -2.982 | -2.982 |
| C30H32F6N4O   | DB09048 | Netupitant                                    | -1.088 | -2.98  |
| C14H22N2O3    | DB09069 | Trimetazidine                                 | -2.52  | -2.976 |
| C35H41N5O5    | DB13345 | Dihydroergocristine                           | -0.743 | -2.975 |
| C15H19NO2     | DB09071 | Tasimelteon                                   | -2.967 | -2.969 |
| C41H50N6O2    | DB11262 | Bisotrizole                                   | -2.948 | -2.967 |
| C26H26ClN3    | DB11614 | Rupatadine                                    | -1.805 | -2.967 |
| C7H16N4O2     | DB11815 | Tilarginine                                   | -2.966 | -2.966 |
| C16H14N2O3    | DB13501 | Bendazac                                      | -2.964 | -2.964 |
| C13H18O2      | DB09213 | Dexibuprofen                                  | -2.961 | -2.962 |
| C14H8N2S4     | DB14201 | 2,2'-Dibenzothiazyl disulfide                 | -2.958 | -2.958 |
| C49H55N9O7    | DB11574 | Elbasvir                                      | -1.568 | -2.956 |

|                 |         |                                             |        |        |
|-----------------|---------|---------------------------------------------|--------|--------|
| C18H15NO8S2     | DB09268 | Picosulfuric acid                           | -2.935 | -2.947 |
| C24H29N7O2      | DB09073 | Palbociclib                                 | -2.475 | -2.945 |
| C21H22N6O       | DB11978 | Glasdegib                                   | -2.318 | -2.945 |
| C41H50N6O2      | DB11262 | Bisoctrizole                                | -0.888 | -2.938 |
| C10H9N5O        | DB11336 | Kinetin                                     | -0.939 | -2.937 |
| C27H34N4O       | DB12492 | Piritramide                                 | -1.337 | -2.933 |
| C10H14N2O2      | DB14754 | Solriamfetol                                | -0.846 | -2.932 |
| C47H72NO10P     | DB14096 | 1,2-icosapentoyl-sn-glycero-3-phosphoserine | -0.642 | -2.926 |
| C25H27N3O2S     | DB09128 | Brexiprazole                                | -1.984 | -2.925 |
| C9H7NO          | DB11145 | Oxyquinoline                                | -2.906 | -2.924 |
| C10H12CaN2Na2O8 | DB14598 | Edetate calcium disodium anhydrous          | -2.9   | -2.914 |
| C11H12N2OS2     | DB14202 | Morpholinylmercaptobenzothiazole            | -2.912 | -2.912 |
| C35H43N5O4      | DB11855 | Revefenacin                                 | -2.84  | -2.912 |
| C20H27NO5       | DB13279 | Carbocromen                                 | -2.899 | -2.902 |
| C40H50N8O6      | DB09102 | Daclatasvir                                 | -1.65  | -2.902 |
| C16H25GdN4O8    | DB09132 | Gadoteric acid                              | -1.5   | -2.902 |
| C9H10O          | DB14186 | Cinnamyl alcohol                            | -2.899 | -2.899 |
| C12H18O         | DB13908 | Amylmetacresol                              | -2.89  | -2.89  |
| C20H22O3        | DB09495 | Avobenzone                                  | -1.668 | -2.885 |
| C14H12O4        | DB11221 | Dioxybenzone                                | -1.178 | -2.885 |
| C29H44N8O3      | DB12141 | Gilteritinib                                | -0.624 | -2.885 |
| C38H8N2OS       | DB13838 | Noxytiolin                                  | -2.882 | -2.882 |
| C13H12N2O3S     | DB09355 | Sulfabenzamide                              | -2.882 | -2.882 |
| CH6N2O3         | DB11129 | Carbamide peroxide                          | -2.877 | -2.877 |
| CH4N2O          | DB09513 | Urea C-14                                   | -2.877 | -2.877 |
| CH4N2O          | DB09510 | Urea C-13                                   | -2.877 | -2.877 |
| C36H51Cl2N3O4   | DB14185 | Aripiprazole lauroxil                       | -2.117 | -2.876 |
| C22H17ClN6O     | DB11952 | Duvelisib                                   | -2.85  | -2.871 |
| C27H38O6        | DB14632 | Prednisolone tebutate                       | -2.863 | -2.863 |
| C9H16N2O2       | DB13221 | Apronalide                                  | -2.862 | -2.862 |
| C20H33N3O3S     | DB09097 | Quinagolide                                 | -0.841 | -2.862 |
| C5H11NO2S       | DB13972 | Racemethionine                              | -2.861 | -2.861 |
| FNa2O3P         | DB09484 | Sodium fluorophosphate                      | -2.836 | -2.854 |
| C14H12ClNO2     | DB09216 | Tolfenamic Acid                             | -2.848 | -2.849 |
| C16H21NO3       | DB11181 | Homatropine                                 | -2.847 | -2.847 |
| C24H31NO4       | DB11269 | Diethylamino hydroxybenzoyl hexyl benzoate  | -2.835 | -2.847 |
| C16H24N2        | DB08944 | Isoaminile                                  | -0.993 | -2.847 |
| C12H18O2        | DB11254 | Hexylresorcinol                             | -2.841 | -2.842 |
| C3H3F5          | DB13117 | Pentafluoropropane                          | -2.827 | -2.827 |
| C17H26N2O4S     | DB13273 | Sultopride                                  | -2.826 | -2.827 |
| C28H41N3O3      | DB12532 | Oxetacaine                                  | -1.51  | -2.824 |
| C15H24N2O2      | DB09085 | Tetracaine                                  | -2.81  | -2.82  |
| C14H9Cl2N3S2    | DB08933 | Luliconazole                                | -2.816 | -2.816 |
| C11H12I3NO2     | DB08946 | Iopanoic acid                               | -2.814 | -2.814 |
| C14H17N5O3S     | DB14203 | Disperse Blue 106                           | -2.807 | -2.807 |
| C11H17NO        | DB11278 | DL-Methylephedrine                          | -2.714 | -2.806 |
| C12H17NO        | DB11282 | Diethyltoluamide                            | -2.801 | -2.801 |
| C2H6O3S2        | DB09110 | Coenzyme M                                  | -2.798 | -2.8   |
| C15H18I3NO3     | DB09340 | Tyropanoic acid                             | -2.796 | -2.797 |
| C9H12N2S        | DB12667 | Protionamide                                | -2.791 | -2.792 |
| C4H7Cl3O        | DB11386 | Chlorobutanol                               | -2.786 | -2.786 |
| C26H36O3        | DB13954 | Estradiol cypionate                         | -2.786 | -2.786 |
| C18H18ClN3S     | DB13256 | Clothiapine                                 | -1.047 | -2.778 |
| C35H41N5O5      | DB13345 | Dihydroergocristine                         | -1.036 | -2.778 |
| C21H19FN6O2     | DB12130 | Lorlatinib                                  | -2.276 | -2.772 |
| C28H36ClN5O3S   | DB09063 | Ceritinib                                   | -2.771 | -2.771 |
| C11H11ClO3      | DB13167 | Alclofenac                                  | -2.768 | -2.769 |
| C23H22ClN5O3    | DB12364 | Betrixaban                                  | -2.759 | -2.759 |
| C10H10N2O       | DB12243 | Edaravone                                   | -1.448 | -2.756 |
| C12H8N2O4Zn     | DB11175 | Zinc picolinate                             | -0.306 | -2.754 |
| C21H45N3        | DB08958 | Hexetidine                                  | -2.318 | -2.751 |
| C9H10O3         | DB13628 | Ethyl hydroxybenzoate                       | -2.73  | -2.748 |
| C4H2FeO4        | DB14491 | Ferrous fumarate                            | -2.745 | -2.745 |

|                 |         |                                     |        |        |
|-----------------|---------|-------------------------------------|--------|--------|
| C16H23NO2       | DB08988 | Ethoheptazine                       | -2.74  | -2.745 |
| C7H8O2          | DB09516 | Mequinol                            | -2.74  | -2.74  |
| C14H22N2O3      | DB09069 | Trimetazidine                       | -2.335 | -2.737 |
| C13H10N2O3S     | DB11115 | Ensulizole                          | -2.324 | -2.735 |
| C20H22O3        | DB09495 | Avobenzone                          | -2.452 | -2.733 |
| C21H19FN6O2     | DB12130 | Lorlatinib                          | -2.397 | -2.733 |
| C6H6Br2N2       | DB14199 | Bromothalonil                       | -2.726 | -2.726 |
| AuH4Na3O8S4     | DB13743 | Sodium aurotiosulfate               | -2.619 | -2.725 |
| C21H34O2        | DB11859 | Brexanolone                         | -2.724 | -2.724 |
| C29H44N8O3      | DB12141 | Gilteritinib                        | -0.031 | -2.723 |
| C29H28F4N4O4    | DB12070 | Letermovir                          | -2.715 | -2.716 |
| C8H11NO5S       | DB09324 | Sulbactam                           | -2.715 | -2.715 |
| C7H5NS2         | DB11496 | 2-mercaptobenzothiazole             | -2.7   | -2.7   |
| C10H12O3        | DB14177 | Propylparaben                       | -2.681 | -2.699 |
| C40H80NO8P      | DB09114 | Colfosceril palmitate               | -2.697 | -2.697 |
| C18H15NO8S2     | DB09268 | Picosulfuric acid                   | -0.357 | -2.697 |
| C17H12I2O3      | DB13277 | Benziodarone                        | -2.685 | -2.693 |
| C18H21ClN2      | DB08936 | Chlorcyclizine                      | -2.298 | -2.693 |
| C20H28O         | DB12474 | Lynestrenol                         | -2.69  | -2.69  |
| K2O4S           | DB14499 | Potassium sulfate                   | -2.681 | -2.681 |
| NiO4S           | DB14180 | Nickel sulfate                      | -2.681 | -2.681 |
| FeO4S           | DB13257 | Ferrous sulfate anhydrous           | -2.681 | -2.681 |
| CrO4S           | DB14530 | Chromous sulfate                    | -2.681 | -2.681 |
| Fe2H10O17S3     | DB11171 | Ferric sulfate                      | -2.681 | -2.681 |
| BaO4S           | DB11150 | Barium sulfate                      | -2.681 | -2.681 |
| Al2O12S3        | DB11239 | Aluminum sulfate                    | -2.681 | -2.681 |
| Na2O4S          | DB09472 | Sodium sulfate                      | -2.681 | -2.681 |
| O4SZn           | DB09322 | Zinc sulfate                        | -2.681 | -2.681 |
| Al5H33Mg10O40S2 | DB08938 | Magaldrate                          | -2.681 | -2.681 |
| AlKO8S2         | DB09087 | Potassium alum                      | -2.681 | -2.681 |
| C20H25N3S       | DB12710 | Perazine                            | -0.336 | -2.68  |
| C22H23ClN2O8    | DB09093 | Chlortetracycline                   | -0.976 | -2.679 |
| C14H30O4S       | DB11328 | Tetradecyl hydrogen sulfate (ester) | -2.677 | -2.677 |
| C17H28N2O       | DB08987 | Etidocaine                          | -2.66  | -2.675 |
| C16H26N2O3      | DB09342 | Propoxycaïne                        | -0.677 | -2.664 |
| C18H12CrN3O6    | DB14529 | Chromium nicotinate                 | -2.649 | -2.658 |
| C20H31NO3       | DB11186 | Pentoxifyverine                     | -0.013 | -2.657 |
| C45H50ClN7O7S   | DB11581 | Venetoclax                          | -0.297 | -2.655 |
| C14H9Cl3N2O5    | DB12245 | Triclabendazole                     | -1.855 | -2.652 |
| C9H12ClN5O      | DB09242 | Moxonidine                          | -2.583 | -2.65  |
| C8H8O3          | DB14212 | Methylparaben                       | -0.726 | -2.649 |
| C7H16N4O4S2     | DB12473 | Taurolidine                         | -1.793 | -2.644 |
| C11H17NO        | DB13624 | Methoxyphenamine                    | -2.642 | -2.642 |
| C18H26N2O5Tc    | DB09164 | Technetium Tc-99m disofenin         | -2.59  | -2.636 |
| C21H23BrFNO2    | DB12401 | Bromperidol                         | -0.382 | -2.634 |
| C19H18FN3O      | DB12332 | Rucaparib                           | -2.617 | -2.632 |
| C14H22N2O3      | DB09069 | Trimetazidine                       | -0.42  | -2.632 |
| C13H20N2O3S     | DB09009 | Articaine                           | -1.136 | -2.631 |
| C30H32F6N4O     | DB09048 | Netupitant                          | -2.602 | -2.628 |
| C4H10O2         | DB14110 | Butylene glycol                     | -2.623 | -2.623 |
| C22H27ClFN7O4S  | DB11718 | Encorafenib                         | -2.224 | -2.613 |
| C18H14Cl4N2O    | DB08943 | Isoconazole                         | -2.395 | -2.603 |
| C49H54F2N8O6    | DB09027 | Ledipasvir                          | -1.422 | -2.603 |
| C28H37N3O3      | DB11591 | Bilastine                           | -2.557 | -2.599 |
| C17H19NO        | DB12293 | Nefopam                             | -2.547 | -2.599 |
| C20H38O7S       | DB11089 | Docusate                            | -2.594 | -2.594 |
| C24H31FO6       | DB14649 | Dexamethasone acetate               | -2.591 | -2.591 |
| C14H9Cl3N2O5    | DB12245 | Triclabendazole                     | -2.406 | -2.587 |
| C21H23BrFNO2    | DB12401 | Bromperidol                         | -2.571 | -2.584 |
| C23H30N2O4      | DB09209 | Pholcodine                          | -1.106 | -2.579 |
| C35H43N5O4      | DB11855 | Revefenacin                         | -0.969 | -2.577 |
| C24H29N3O8      | DB12035 | Sarecycline                         | 0.055  | -2.575 |
| C32H34N4O6      | DB11691 | Naldemedine                         | -2.18  | -2.571 |

|                 |         |                                             |        |        |
|-----------------|---------|---------------------------------------------|--------|--------|
| C20H25NO        | DB11609 | Normethadone                                | -2.566 | -2.57  |
| C16H18N2O7S2    | DB12343 | Temocillin                                  | -2.569 | -2.569 |
| C20H23CIN2O4    | DB09555 | Dexchlorpheniramine maleate                 | -2.568 | -2.568 |
| C18H18CINOS     | DB09225 | Zotepine                                    | -2.563 | -2.563 |
| C26H23N7O2      | DB11703 | Acalabrutinib                               | -2.545 | -2.559 |
| C23H29NO3       | DB12278 | Propiverine                                 | -2.549 | -2.556 |
| C19H22N2O3      | DB13286 | Bumadizone                                  | -2.551 | -2.551 |
| C47H72NO10P     | DB14096 | 1,2-icosapentoyl-sn-glycero-3-phosphoserine | -2.538 | -2.55  |
| C50H71N13O12    | DB11842 | Angiotensin II                              | -1.868 | -2.546 |
| C8H9ClO         | DB11121 | Chloroxylenol                               | -2.543 | -2.545 |
| C16H24N2        | DB08944 | Isoaminile                                  | -2.518 | -2.544 |
| C17H25NO2       | DB11096 | Meradimate                                  | -2.541 | -2.541 |
| C29H34Cl2N6O3S2 | DB11995 | Avatrombopag                                | -2.537 | -2.541 |
| C13H14Cl2O3     | DB09064 | Ciprofibrate                                | -2.537 | -2.537 |
| C12H12N4O3      | DB11989 | Benznidazole                                | -2.528 | -2.528 |
| C49H54F2N8O6    | DB09027 | Ledipasvir                                  | -1.171 | -2.528 |
| C27H33N2O6S2    | DB09136 | Isosulfan blue                              | -2.309 | -2.523 |
| C38H46F4N6O9S   | DB13879 | Glecaprevir                                 | -2.519 | -2.522 |
| C27H31FN4O8     | DB12329 | Eravacycline                                | 0.011  | -2.522 |
| C13H10N2O3S     | DB11115 | Ensulizole                                  | -1.954 | -2.521 |
| C7H10O6S3       | DB13267 | Ritiometan                                  | -2.519 | -2.519 |
| C20H25N3S       | DB12710 | Perazine                                    | -2.238 | -2.518 |
| C10H12O2        | DB09086 | Eugenol                                     | -2.516 | -2.516 |
| C10H20O2        | DB14187 | Hydroxycitronellal                          | -2.514 | -2.514 |
| C12H14O4        | DB11285 | Ethyl ferulate                              | -2.512 | -2.513 |
| C6H8N2          | DB14141 | p-Phenylenediamine                          | -2.386 | -2.511 |
| C18H21N3O       | DB13225 | Dibenzepin                                  | -2.492 | -2.507 |
| C19H20N4O       | DB11793 | Niraparib                                   | -2.503 | -2.503 |
| C31H41N5O5      | DB11273 | Dihydroergocornine                          | -0.762 | -2.5   |
| C45H54F2N4O8    | DB11641 | Vinflunine                                  | -0.283 | -2.499 |
| C19H19NS        | DB13292 | Pimethixene                                 | -0.023 | -2.498 |
| C13H16ClNO      | DB11823 | Esketamine                                  | -2.379 | -2.483 |
| C34H67O10P      | DB11284 | DL-dimyristoylphosphatidylglycerol          | -2.47  | -2.47  |
| C16H19NO2       | DB13219 | Medifoxamine                                | -1.998 | -2.464 |
| C20H25N3S       | DB12710 | Perazine                                    | -1.853 | -2.463 |
| C28H37N3O3      | DB11591 | Bilastine                                   | 0.01   | -2.454 |
| C17H24O3        | DB11201 | Menthyl salicylate                          | -2.449 | -2.451 |
| C27H30Cl2O6     | DB14512 | Mometasone furoate                          | -2.449 | -2.449 |
| C24H31N3OS      | DB13213 | Butaperazine                                | -1.839 | -2.448 |
| C40H53N7O5S2    | DB09065 | Cobicistat                                  | -2.135 | -2.446 |
| C21H24O2        | DB11619 | Gestrinone                                  | -2.437 | -2.437 |
| C49H55N9O7      | DB11574 | Elbasvir                                    | -1.157 | -2.437 |
| C40H43N7O7S     | DB09297 | Paritaprevir                                | -2.429 | -2.435 |
| C32H55N4O       | DB09552 | Thonzonium                                  | -2.43  | -2.43  |
| C40H50N8O6      | DB09102 | Daclatasvir                                 | -1.559 | -2.424 |
| C16H28N2O2      | DB13288 | Tromantadine                                | -2.408 | -2.422 |
| C26H26N2O6S     | DB09319 | Carindacillin                               | -2.173 | -2.422 |
| C23H32O3        | DB13956 | Estradiol valerate                          | -2.416 | -2.416 |
| C20H24N         | DB13720 | Diphemanil                                  | -2.405 | -2.405 |
| C30H44N2O10     | DB13265 | Hexobendine                                 | -2.383 | -2.404 |
| C7H16N4O4S2     | DB12473 | Taurolidine                                 | -1.835 | -2.404 |
| C4H4CINOS       | DB14197 | Methylchloroisothiazolinone                 | -2.403 | -2.403 |
| C18H40O4P2      | DB11180 | Tetofosmin                                  | -1.543 | -2.402 |
| C36H84O10P4Tc   | DB09160 | Technetium Tc-99m tetrafosmin               | -1.543 | -2.402 |
| C19H14F2N6O     | DB11760 | Talazoparib                                 | -2.393 | -2.393 |
| C20H19FN8O2     | DB08931 | Riociguat                                   | -2.389 | -2.391 |
| C9H10O3         | DB13628 | Ethyl hydroxybenzoate                       | -0.323 | -2.388 |
| C10H12O2        | DB14188 | Isoeugenol                                  | -2.385 | -2.386 |
| C29H33FN2O4     | DB09030 | Vorapaxar                                   | -2.352 | -2.363 |
| C12H17NO3       | DB13346 | Bufexamac                                   | -2.356 | -2.361 |
| C9H17Cl2N4      | DB14198 | Quaternium-15                               | -2.355 | -2.355 |
| C6H18O4Si3      | DB09512 | Simethicone                                 | -2.354 | -2.354 |
| C9H15NO2        | DB13262 | Aceclidine                                  | -2.352 | -2.354 |

|                  |         |                                 |        |        |
|------------------|---------|---------------------------------|--------|--------|
| C27H32F2N8       | DB12001 | Abemaciclib                     | 0.3    | -2.351 |
| C10H13N3O2       | DB13211 | Guanoxan                        | -2.347 | -2.347 |
| C22H24N2O2       | DB09488 | Acrivastine                     | -2.338 | -2.344 |
| C17H21NO         | DB11160 | Phenyltoloxamine                | -0.33  | -2.343 |
| C29H34NO2        | DB09076 | Umeclidinium                    | -2.332 | -2.332 |
| C21H15F4N5O2S    | DB11901 | Apalutamide                     | -2.329 | -2.329 |
| C13H16N2S2       | DB14200 | Thiohexam                       | -2.327 | -2.327 |
| C16H26N2O3       | DB09342 | Propoxycaine                    | -2.3   | -2.321 |
| C27H23F2N3O7S    | DB13997 | Baloxavir marboxil              | -2.318 | -2.318 |
| C15H20O3         | DB11207 | Amiloxate                       | -2.312 | -2.312 |
| C4F10            | DB12821 | Perflubutane                    | -2.312 | -2.312 |
| C24H30CIN7O4S    | DB09075 | Edoxaban                        | -1.638 | -2.308 |
| C13H18CIN3O4S2   | DB13532 | Cyclopenanthiazide              | -2.296 | -2.306 |
| C14H19N3O        | DB13216 | Oxolamine                       | -2.288 | -2.306 |
| C14H18O          | DB14175 | alpha-Amyl cinnamaldehyde       | -2.304 | -2.304 |
| C21H35NO         | DB09056 | Amorolfine                      | -1.496 | -2.303 |
| C28H34O8S2       | DB09534 | Ecamsule                        | -2.299 | -2.299 |
| C10H12O3         | DB14177 | Propylparaben                   | -0.212 | -2.294 |
| C35H41N5O5       | DB13345 | Dihydroergocristine             | -2.245 | -2.292 |
| C10H8OS3         | DB13853 | Anethole trithione              | -2.281 | -2.281 |
| C29H42O6         | DB14541 | Hydrocortisone cypionate        | -2.27  | -2.27  |
| C18H33NO3        | DB11272 | Methyl undecenoyl leucinate     | -2.27  | -2.27  |
| Al2ClH7O6        | DB11573 | Aluminum chlorohydrate          | -2.267 | -2.267 |
| H2O              | DB09145 | Water                           | -2.267 | -2.267 |
| H8O4Tc           | DB09314 | Technetium Tc-99m pertechnetate | -2.267 | -2.267 |
| C8H17FeN3O6S2    | DB11197 | Ferrous cysteine glycinate      | -2.244 | -2.258 |
| C19H19NS         | DB13292 | Pimethixene                     | -2.245 | -2.255 |
| O2Si             | DB11132 | Silicon dioxide                 | -2.252 | -2.252 |
| C27H31FN4O8      | DB12329 | Eravacycline                    | -0.106 | -2.248 |
| C25H24N6O2       | DB09053 | Ibrutinib                       | -2.247 | -2.247 |
| C45H54F2N4O8     | DB11641 | Vinflunine                      | -2.043 | -2.247 |
| C11H14O3         | DB14084 | Butylparaben                    | -0.161 | -2.244 |
| F6S              | DB11104 | Sulfur hexafluoride             | -2.242 | -2.242 |
| C15H26O          | DB13153 | Levomenol                       | -2.235 | -2.235 |
| C27H36N2O5       | DB09083 | Ivabradine                      | -2.234 | -2.235 |
| C15H12F3NO4S     | DB12938 | Isoxaflutole                    | -2.229 | -2.229 |
| C12H24N2O4S2     | DB11164 | Bicisate                        | -0.485 | -2.229 |
| C24H45BiO6       | DB13910 | Valproate bismuth               | -2.223 | -2.225 |
| C32H39NO2        | DB11742 | Ebastine                        | 0.281  | -2.224 |
| C20H25FN2O3      | DB09149 | Florbetapir (18F)               | -2.216 | -2.219 |
| C21H38N          | DB13282 | Benzododecinium                 | -2.215 | -2.215 |
| C15H9FO2         | DB13136 | Fluindione                      | -2.213 | -2.214 |
| C23H29NO3        | DB12278 | Propiverine                     | 0.379  | -2.206 |
| C17H28O5         | DB13851 | Artemotil                       | -2.204 | -2.204 |
| C26H26CIN3       | DB11614 | Rupatadine                      | -0.399 | -2.204 |
| C9H5I2NO         | DB09115 | Diiodohydroxyquinoline          | -1.924 | -2.203 |
| C27H34N4O        | DB12492 | Piritramide                     | -2.105 | -2.2   |
| C36H51Cl2N3O4    | DB14185 | Aripiprazole lauroxil           | -2.004 | -2.197 |
| C20H2Br4Cl4Na2O5 | DB13911 | Phloxine B                      | -2.195 | -2.196 |
| C36H84O10P4Tc    | DB09160 | Technetium Tc-99m tetrofosmin   | -1.603 | -2.196 |
| C19H27NO3        | DB12161 | Deutetrabenazine                | -0.698 | -2.193 |
| C6H9AlO6         | DB14518 | Aluminum acetate                | -2.186 | -2.189 |
| C2H3KO2          | DB14498 | Potassium acetate               | -2.186 | -2.189 |
| C4H6O4Zn         | DB14487 | Zinc acetate                    | -2.186 | -2.189 |
| C4H6MgO4         | DB13996 | Magnesium acetate               | -2.186 | -2.189 |
| C4H14MgO8        | DB09409 | Magnesium acetate tetrahydrate  | -2.186 | -2.189 |
| C2H3NaO2         | DB09395 | Sodium acetate                  | -2.186 | -2.189 |
| C13H19NO3        | DB09185 | Viloxazine                      | -0.254 | -2.187 |
| C15H23N3OS       | DB13858 | Dimazole                        | -0.173 | -2.186 |
| C36H84O10P4Tc    | DB09160 | Technetium Tc-99m tetrofosmin   | -1.636 | -2.182 |
| C14H12O3         | DB14176 | Benzyiparaben                   | -0.26  | -2.177 |
| HLiO             | DB14506 | Lithium hydroxide               | -2.175 | -2.175 |
| FeHO2            | DB14695 | Ferric oxyhydroxide             | -2.175 | -2.175 |

|                 |         |                                                |        |        |
|-----------------|---------|------------------------------------------------|--------|--------|
| HKO             | DB11153 | Potassium hydroxide                            | -2.175 | -2.175 |
| HNaO            | DB11151 | Sodium hydroxide                               | -2.175 | -2.175 |
| H2MgO2          | DB09104 | Magnesium hydroxide                            | -2.175 | -2.175 |
| C18H40O4P2      | DB11180 | Tetrofosmin                                    | -1.578 | -2.171 |
| C2HCl3          | DB13323 | Trichloroethylene                              | -2.17  | -2.17  |
| C20H33N3O3S     | DB09097 | Quinagolide                                    | -0.088 | -2.165 |
| C29H44N8O3      | DB12141 | Gilteritinib                                   | -2.136 | -2.162 |
| C27H33N2        | DB11279 | Brilliant green cation                         | -1.947 | -2.161 |
| C27H32F2N8      | DB12001 | Abemaciclib                                    | -0.008 | -2.161 |
| C23H38O5        | DB08964 | Gemprost                                       | -2.153 | -2.153 |
| ClO             | DB11123 | Hypochlorite                                   | -2.153 | -2.153 |
| C14H21NO2       | DB09088 | Amylocaine                                     | 0.184  | -2.152 |
| C11H15NO2       | DB11148 | Butamben                                       | -2.15  | -2.15  |
| C24H30ClN7O4S   | DB09075 | Edoxaban                                       | -1.912 | -2.142 |
| C18H22N2S       | DB09068 | Vortioxetine                                   | 0.543  | -2.136 |
| C49H54N8O8      | DB11613 | Velpatasvir                                    | -1.523 | -2.126 |
| C18H40O4P2      | DB11180 | Tetrofosmin                                    | -1.571 | -2.117 |
| C21H22N6O       | DB11978 | Glasdegib                                      | -1.665 | -2.103 |
| C24H19NO5       | DB14627 | Oxyphenisatin acetate                          | -2.092 | -2.092 |
| C26H23N7O2      | DB11703 | Acalabrutinib                                  | 0.139  | -2.083 |
| C14H21NO2       | DB09088 | Amylocaine                                     | -2.067 | -2.079 |
| C15H24N2O2      | DB09085 | Tetracaine                                     | 0.341  | -2.077 |
| C15H20O3        | DB13063 | Parthenolide                                   | -2.07  | -2.07  |
| C24H39N3O3Si3   | DB11585 | Drometrizole trisiloxane                       | -2.063 | -2.063 |
| C18H21ClN2      | DB08936 | Chlorcyclizine                                 | -0.027 | -2.059 |
| C38H49N3O5      | DB11206 | Bemotrizinol                                   | -2.043 | -2.043 |
| C18H21NO        | DB11584 | Pipradrol                                      | -2.037 | -2.041 |
| C25H30N6O2      | DB12147 | Erdafitinib                                    | -2.036 | -2.036 |
| C12H19NO4       | DB14006 | Choline salicylate                             | -2.024 | -2.024 |
| C5H14NO         | DB09563 | Choline C-11                                   | -2.024 | -2.024 |
| C5H14ClNO       | DB09277 | Choline C 11                                   | -2.024 | -2.024 |
| C24H44BCuF4N4O4 | DB14106 | Tetrakis(2-methoxyisobutylisocyanide)copper(I) | -2.02  | -2.02  |
| C36H66N6O6Tc    | DB09161 | Technetium Tc-99m sestamibi                    | -2.02  | -2.02  |
| C26H32N2O8      | DB13711 | Tritoqualine                                   | -1.847 | -2.014 |
| H4OSi           | DB11343 | Silanol                                        | -2.01  | -2.01  |
| C18H22O         | DB11219 | Enzacamene                                     | -2.009 | -2.009 |
| C15H18N2        | DB14195 | 4-(Isopropylamino)diphenylamine                | -1.405 | -1.997 |
| C11H9B3N2O4     | DB09133 | Iothalamic acid                                | -1.994 | -1.994 |
| CHCl3           | DB11387 | Chloroform                                     | -1.993 | -1.993 |
| C25H46N         | DB11583 | Cetalkonium                                    | -1.992 | -1.992 |
| C32H39NO2       | DB11742 | Ebastine                                       | -1.982 | -1.991 |
| C25H28O3        | DB13953 | Estradiol benzoate                             | -1.983 | -1.983 |
| C38H74NaO10P    | DB14105 | Sodium 1,2-Dipalmitoyl-sn-glycero-3-phospho-   | -1.955 | -1.956 |
| C20H19F2N3O5    | DB08930 | Dolutegravir                                   | -1.29  | -1.915 |
| C21H18F3N3O5    | DB11799 | Bictegravir                                    | -1.375 | -1.899 |
| C17H21NO        | DB11160 | Phenyltoloxamine                               | -1.873 | -1.893 |
| C16H18ClN3S     | DB09241 | Methylene blue                                 | -1.863 | -1.882 |
| C26H26F3N3O3    | DB09143 | Sonidegib                                      | -1.875 | -1.875 |
| C41H67NO15      | DB13179 | Troleandomycin                                 | -0.995 | -1.871 |
| C30H34N4O2      | DB11363 | Alectinib                                      | -0.983 | -1.863 |
| C17H13N3O5S2    | DB13248 | Phthalylsulfathiazole                          | -1.565 | -1.861 |
| C35H38N4O6      | DB09238 | Manidipine                                     | -1.719 | -1.859 |
| C31H52O3        | DB14002 | D-alpha-Tocopherol acetate                     | -1.849 | -1.849 |
| C13H15N3O4S     | DB14033 | Acetyl sulfisoxazole                           | -1.842 | -1.842 |
| C12H20N2S4      | DB14174 | Dipentamethylenethiuram disulfide              | -1.842 | -1.842 |
| C6H12N2S3       | DB14178 | Tetramethylthiuram monosulfide                 | -1.836 | -1.836 |
| C26H41BrNO4     | DB09090 | Pinaverium                                     | -1.83  | -1.83  |
| C18H14Cl4N2O    | DB08943 | Isoconazole                                    | -1.1   | -1.823 |
| C40H50N8O6      | DB09102 | Daclatasvir                                    | -0.696 | -1.817 |
| C27H33N2O6S2    | DB09136 | Isosulfan blue                                 | -1.109 | -1.815 |
| C27H42NO2       | DB11125 | Benzethonium                                   | -1.799 | -1.799 |
| C29H35F3N2O3    | DB12371 | Siponimod                                      | -1.79  | -1.797 |
| C30H34N4O2      | DB11363 | Alectinib                                      | -1.645 | -1.797 |



|                |         |                                             |        |        |
|----------------|---------|---------------------------------------------|--------|--------|
| C25H27N3O2S    | DB09128 | Brexpiprazole                               | -1.659 | -1.794 |
| C49H54N8O8     | DB11613 | Velpatasvir                                 | -0.396 | -1.781 |
| C17H27NO3      | DB09345 | Pramocaine                                  | -1.37  | -1.771 |
| C19H20Cl2N2O5  | DB13258 | Etofamide                                   | -1.762 | -1.762 |
| AuH4Na3O8S4    | DB13743 | Sodium aurotiosulfate                       | -0.686 | -1.76  |
| C6H15NO3       | DB13747 | Trolamine                                   | -0.452 | -1.746 |
| C24H31N3OS     | DB13213 | Butaperazine                                | 0.6    | -1.744 |
| C16H18ClN3S    | DB09241 | Methylene blue                              | 0.323  | -1.743 |
| C18H22F2N4O    | DB09040 | Efinaconazole                               | -1.703 | -1.733 |
| C14H20Br2N2    | DB09019 | Bromhexine                                  | 0.232  | -1.716 |
| C19H23N3O      | DB09084 | Benzylamine                                 | -1.695 | -1.695 |
| C27H33N2       | DB11279 | Brilliant green cation                      | -0.981 | -1.688 |
| C17H20N2O2     | DB11699 | Tropisetron                                 | -1.678 | -1.683 |
| C25H25F3N4O6   | DB11637 | Delamanid                                   | 0.688  | -1.681 |
| C12H17NO3      | DB12911 | Nicoboxil                                   | -1.68  | -1.68  |
| C20H31NO3      | DB11186 | Pentoxifyverine                             | -1.671 | -1.678 |
| C17H27NO2      | DB11570 | Padimate O                                  | -1.669 | -1.669 |
| C19H25N3O2S2   | DB08967 | Dimetotiazine                               | -1.664 | -1.665 |
| CO2            | DB09157 | Carbon dioxide                              | -1.66  | -1.66  |
| C9H8O          | DB14184 | Cinnamaldehyde                              | -1.66  | -1.66  |
| C19H28O8       | DB09274 | Artesunate                                  | -1.658 | -1.659 |
| C29H38N4O6S    | DB09320 | Procaine benzylpenicillin                   | -1.657 | -1.657 |
| C24H31N3OS     | DB13213 | Butaperazine                                | -1.373 | -1.653 |
| C18H22N2S      | DB09068 | Vortioxetine                                | -1.641 | -1.647 |
| C45H54F2N4O8   | DB11641 | Vinflunine                                  | -0.583 | -1.642 |
| C12H9NO2       | DB12300 | P-nitrobiphenyl                             | -1.639 | -1.639 |
| S8Tc           | DB09397 | Technetium Tc-99m sulfur colloid            | -1.631 | -1.631 |
| S8             | DB09353 | Octasulfur                                  | -1.631 | -1.631 |
| C23H30N8O      | DB11730 | Ribociclib                                  | -1.556 | -1.625 |
| C21H24N2       | DB13246 | Quinupramine                                | -1.61  | -1.61  |
| C30H48O3       | DB13946 | Testosterone undecanoate                    | -1.596 | -1.596 |
| C49H54N8O8     | DB11613 | Velpatasvir                                 | -0.382 | -1.59  |
| C23H23ClN6O2   | DB09034 | Suvorexant                                  | -1.561 | -1.561 |
| C23H32Cl2N6O6P | DB14674 | Estramustine phosphate                      | -1.391 | -1.54  |
| C21H35NO       | DB09056 | Amorolfine                                  | -1.356 | -1.531 |
| C49H55N9O7     | DB11574 | Elbasvir                                    | -0.158 | -1.526 |
| C27H42Cl2N2O6  | DB14658 | Chloramphenicol palmitate                   | -1.524 | -1.524 |
| C28H33N7O2     | DB09330 | Osimertinib                                 | -1.507 | -1.514 |
| C57H65F5N10O8  | DB13878 | Pibrentasvir                                | -0.357 | -1.501 |
| CHI3           | DB13813 | Iodoform                                    | -1.488 | -1.488 |
| C10H18O        | DB14183 | Geraniol                                    | -1.484 | -1.484 |
| C10H16O        | DB14156 | Synthetic camphor                           | -1.475 | -1.475 |
| C27H40O3       | DB13943 | Testosterone cypionate                      | -1.467 | -1.467 |
| C32H43N5O5     | DB11275 | Epicriptine                                 | -1.423 | -1.466 |
| C2H2F4         | DB13116 | Norflurane                                  | -1.463 | -1.463 |
| C2H5Cl         | DB13259 | Ethyl chloride                              | -1.451 | -1.451 |
| C29H24Cl2N2O7S | DB11611 | Lifitegrast                                 | -1.45  | -1.45  |
| CO             | DB11588 | Carbon monoxide                             | -1.426 | -1.426 |
| C18H22N2       | DB14196 | N-Cyclohexyl-N'-phenyl-1,4-phenylenediamine | -1.217 | -1.415 |
| C31H38O7       | DB11260 | Diacetyl benzoyl lathyrol                   | -1.386 | -1.386 |
| C11H14N2S      | DB11156 | Pyrantel                                    | -1.375 | -1.376 |
| C31H33N5O4     | DB09079 | Nintedanib                                  | -0.543 | -1.367 |
| C18H26O3       | DB09496 | Octinoxate                                  | -1.361 | -1.361 |
| C30H50O2       | DB14555 | Ursadiol                                    | -1.333 | -1.333 |
| C4H10FeN2O8S   | DB14501 | Ferrous glycine sulfate                     | -1.31  | -1.31  |
| C4H8FeN2O4     | DB11210 | Ferrous bisglycinate                        | -1.31  | -1.31  |
| C2H8AlClNO4Zr  | DB11200 | Aluminum zirconium octachlorohydrax gly     | -1.31  | -1.31  |
| C4H8MgN2O4     | DB11189 | Magnesium glycinate                         | -1.31  | -1.31  |
| C6H12N2S4      | DB13245 | Thiram                                      | -1.307 | -1.307 |
| C40H53N7O5S2   | DB09065 | Cobicistat                                  | -0.753 | -1.282 |
| C13H20N2O3S    | DB09009 | Articaine                                   | -1.217 | -1.267 |
| C15H23N3OS     | DB13858 | Dimazole                                    | -1.238 | -1.258 |
| C26H32N2O8     | DB13711 | Tritoqualine                                | -0.425 | -1.257 |

|                 |         |                                                |        |        |
|-----------------|---------|------------------------------------------------|--------|--------|
| O2              | DB09140 | Oxygen                                         | -1.238 | -1.238 |
| C18H22N2        | DB14196 | N-Cyclohexyl-N'-phenyl-1,4-phenylenediamine    | -0.489 | -1.235 |
| C26H26ClN3      | DB11614 | Rupatadine                                     | -1.092 | -1.215 |
| C27H32F2N8      | DB12001 | Abemaciclib                                    | -0.389 | -1.207 |
| C18H30O2        | DB13854 | Gamolenic acid                                 | -1.198 | -1.202 |
| C24H25ClFN5O2   | DB11963 | Dacomitinib                                    | 0.099  | -1.184 |
| C21H26F3N5      | DB09195 | Lorpiprazole                                   | -0.131 | -1.172 |
| C31H33N5O4      | DB09079 | Nintedanib                                     | 1.372  | -1.138 |
| C13H21NO6       | DB11079 | Trolamine salicylate                           | 0.176  | -1.117 |
| C14H20Br2N2     | DB09019 | Bromhexine                                     | -1.089 | -1.112 |
| C21H35N2O3      | DB09376 | Lapyrium                                       | -1.103 | -1.103 |
| C49H55N9O7      | DB11574 | Elbasvir                                       | 0.168  | -1.086 |
| C13H10O3        | DB11071 | Phenyl salicylate                              | 0.842  | -1.052 |
| C25H35NO5       | DB12554 | Mebeverine                                     | -1.017 | -1.02  |
| C21H46NO4P      | DB09031 | Miltefosine                                    | -0.998 | -0.998 |
| H2O2            | DB11091 | Hydrogen peroxide                              | -0.996 | -0.996 |
| C35H46ClN5O9S   | DB11586 | Asunaprevir                                    | -0.961 | -0.967 |
| C26H26N2O6S     | DB09319 | Carindacillin                                  | -0.329 | -0.964 |
| C24H31NO4       | DB11269 | Diethylamino hydroxybenzoyl hexyl benzoate     | 1.333  | -0.956 |
| C13H18ClN3O4S2  | DB13532 | Cyclopenthiiazide                              | 1.49   | -0.952 |
| C37H34N2Na2O9S3 | DB11183 | Light green SF yellowish                       | -0.939 | -0.941 |
| Si              | DB12982 | Silicon                                        | -0.915 | -0.915 |
| C26H40O3        | DB13944 | Testosterone enanthate                         | -0.912 | -0.912 |
| NO2             | DB12529 | Nitrite                                        | -0.901 | -0.901 |
| C               | DB09278 | Activated charcoal                             | -0.889 | -0.889 |
| C21H28O2        | DB09389 | Norgestrel                                     | -0.87  | -0.87  |
| C17H26ClNO      | DB11642 | Pitolisant                                     | -0.837 | -0.838 |
| P               | DB14151 | Phosphorus                                     | -0.812 | -0.812 |
| C25H25F3N4O6    | DB11637 | Delamanid                                      | -0.758 | -0.769 |
| C23H36O3        | DB14655 | Drostanolone propionate                        | -0.755 | -0.755 |
| Bi5H9N4O22      | DB13209 | Bismuth subnitrate                             | -0.661 | -0.661 |
| CrN3O9          | DB14527 | Chromic nitrate                                | -0.661 | -0.661 |
| KNO3            | DB11090 | Potassium nitrate                              | -0.661 | -0.661 |
| C40H50N8O6      | DB09102 | Daclatasvir                                    | 0.517  | -0.651 |
| C35H38N4O6      | DB09238 | Manidipine                                     | 0.843  | -0.55  |
| C27H33N2O7S2    | DB13967 | Patent Blue                                    | 0.167  | -0.542 |
| C28H22ClF3N6O3  | DB14568 | Ivosidenib                                     | -0.52  | -0.52  |
| C40H50N8O6      | DB09102 | Daclatasvir                                    | 0.376  | -0.464 |
| N2              | DB09152 | Nitrogen                                       | -0.417 | -0.417 |
| C29H33FN2O4     | DB09030 | Vorapaxar                                      | 1.944  | -0.413 |
| C9H14N4O4       | DB09282 | Molsidomine                                    | -0.405 | -0.405 |
| C21H38N         | DB11073 | Cetylpyridinium                                | -0.341 | -0.341 |
| HNO2            | DB09112 | Nitrous acid                                   | -0.34  | -0.34  |
| C23H32Cl2NO6P   | DB14674 | Estramustine phosphate                         | 0.674  | -0.22  |
| C31H35F6N4O5P   | DB14019 | Fosnetupitant                                  | 1.806  | -0.175 |
| C22H40NO        | DB11594 | Domiphen                                       | -0.149 | -0.149 |
| C25H29NO3       | DB11226 | Ethylhexyl methoxycrylene                      | -0.079 | -0.079 |
| C11H20O2        | DB11117 | Undecylenic acid                               | 0.067  | 0.063  |
| C16H34O         | DB09494 | Cetyl alcohol                                  | 0.078  | 0.078  |
| C16H25GdN4O8    | DB09132 | Gadoteric acid                                 | 0.183  | 0.118  |
| C17H13N3O5S2    | DB13248 | Phthalylsulfathiazole                          | 1.146  | 0.592  |
| C14H11Cl2NO4    | DB14638 | Diloxanide furoate                             | 0.644  | 0.644  |
| C17H34O2        | DB13966 | Isopropyl myristate                            | 0.772  | 0.772  |
| C18H32O2        | DB14104 | Linoleic acid                                  | 0.981  | 0.977  |
| C16H25NO3       | DB09205 | Moxisylyte                                     | 3.169  | 1.156  |
| C22H19NO4       | DB09020 | Bisacodyl                                      | 1.187  | 1.176  |
| C40H77O10P      | DB11331 | 1-Palmitoyl-2-oleoyl-sn-glycero-3-(phospho-rac | 1.195  | 1.195  |
| C6H15NO3        | DB13747 | Trolamine                                      | 1.445  | 1.374  |
| C10H11I2NO3     | DB09366 | Propylidone                                    | 1.414  | 1.414  |
| C13H21NO6       | DB11079 | Trolamine salicylate                           | 1.518  | 1.447  |
| C18H40N         | DB13970 | Diocetyltrimonium                              | 1.496  | 1.496  |
| C22H29NO5       | DB09089 | Trimebutine                                    | 2.436  | 1.781  |
| C32H48O4        | DB13955 | Estradiol dieneanthate                         | 2.5    | 2.5    |

|            |         |                |       |       |
|------------|---------|----------------|-------|-------|
| C31H33N5O4 | DB09079 | Nintedanib     | 4.503 | 3.649 |
| C22H19NO4  | DB09020 | Bisacodyl      | 7.208 | 4.867 |
| C41H67NO15 | DB13179 | Troleandomycin | 5.432 | 5.279 |

### FDA approved drugs with 6vw1, Table S6

| FORMULA             | DRUGBANK_ID | GENERIC_NAME                                | docking score | glide gscore |
|---------------------|-------------|---------------------------------------------|---------------|--------------|
| C23H45N5O14         | DB01421     | Paromomycin                                 | -9.02         | -10.01       |
| C22H30MnN4O14P2     | DB06796     | Mangafodipir                                | -7.181        | -9.089       |
| C22H30MnN4O14P2     | DB06796     | Mangafodipir                                | -7.846        | -9.032       |
| C27H33N9O15P2       | DB03147     | Flavin adenine dinucleotide                 | -8.986        | -8.986       |
| C17H34N4O10         | DB03615     | Ribostamycin                                | -6.763        | -8.781       |
| C23H45N5O14         | DB01421     | Paromomycin                                 | -6.056        | -8.661       |
| C27H30O16           | DB01698     | Rutin                                       | -6.587        | -8.507       |
| C23H45N5O14         | DB01421     | Paromomycin                                 | -7.422        | -8.505       |
| C22H30MnN4O14P2     | DB06796     | Mangafodipir                                | -5.945        | -8.455       |
| C23H45N5O14         | DB01421     | Paromomycin                                 | -6.022        | -8.213       |
| C5H13O14P3          | DB01632     | 5-O-phosphono-alpha-D-ribofuranosyl diphosp | -5.843        | -8.179       |
| C28H44N2O23         | DB08818     | Hyaluronic acid                             | -8.121        | -8.121       |
| C5H13O14P3          | DB01632     | 5-O-phosphono-alpha-D-ribofuranosyl diphosp | -6.761        | -8.042       |
| C5H13O14P3          | DB01632     | 5-O-phosphono-alpha-D-ribofuranosyl diphosp | -6.805        | -8.038       |
| C17H21N4O9P         | DB03247     | Flavin mononucleotide                       | -6.931        | -8.006       |
| C22H30MnN4O14P2     | DB06796     | Mangafodipir                                | -6.961        | -7.985       |
| C18H36N4O11         | DB01172     | Kanamycin                                   | -6.414        | -7.983       |
| C18H36N4O11         | DB01172     | Kanamycin                                   | -6.417        | -7.931       |
| C23H45N5O14         | DB01421     | Paromomycin                                 | -6.113        | -7.858       |
| C23H23N7O5          | DB06813     | Pralatrexate                                | -7.787        | -7.829       |
| C12H22O11           | DB02772     | Sucrose                                     | -7.817        | -7.817       |
| C27H30O16           | DB01698     | Rutin                                       | -7.774        | -7.803       |
| C12H17N3O4S         | DB01598     | Imipenem                                    | -7.746        | -7.747       |
| C18H36N4O11         | DB01172     | Kanamycin                                   | -6.118        | -7.669       |
| C52H76O24           | DB06810     | Plicamycin                                  | -5.89         | -7.603       |
| C17H25Cl2F3N5O12P3S | DB06441     | Cangrelor                                   | -5.256        | -7.482       |
| C23H45N5O14         | DB01421     | Paromomycin                                 | -5.222        | -7.467       |
| C22H30MnN4O14P2     | DB06796     | Mangafodipir                                | -6.279        | -7.465       |
| C18H36N4O11         | DB01172     | Kanamycin                                   | -7.231        | -7.38        |
| C21H39N7O12         | DB01082     | Streptomycin                                | -7.2          | -7.364       |
| C19H24N2O4          | DB00983     | Formoterol                                  | -5.016        | -7.324       |
| C23H45N5O14         | DB01421     | Paromomycin                                 | -5.179        | -7.295       |
| C5H13O14P3          | DB01632     | 5-O-phosphono-alpha-D-ribofuranosyl diphosp | -7.113        | -7.292       |
| C52H76O24           | DB06810     | Plicamycin                                  | -7.156        | -7.208       |
| C20H32N6O12S2       | DB03310     | Glutathione disulfide                       | -7.145        | -7.149       |
| C23H45N5O14         | DB01421     | Paromomycin                                 | -4.736        | -7.137       |
| C26H27NO9           | DB01177     | Idarubicin                                  | -7.104        | -7.132       |
| C33H38GdN3Na3O14P   | DB06705     | Gadofosveset trisodium                      | -5.733        | -7.125       |
| C17H34N4O10         | DB03615     | Ribostamycin                                | -5.521        | -7.123       |
| C17H34N4O10         | DB03615     | Ribostamycin                                | -5.475        | -7.039       |
| C28H54N8            | DB06809     | Plerixafor                                  | -5.499        | -6.973       |
| C52H76O24           | DB06810     | Plicamycin                                  | -4.839        | -6.943       |
| C11H15N5O5          | DB01280     | Nelarabine                                  | -6.83         | -6.83        |
| C17H34N4O10         | DB03615     | Ribostamycin                                | -4.864        | -6.762       |
| C28H54N8            | DB06809     | Plerixafor                                  | -4.09         | -6.761       |
| C6H17N2O12P4Sm      | DB05273     | Samarium (153Sm) lexicidronam               | -6.687        | -6.705       |
| C33H38GdN3Na3O14P   | DB06705     | Gadofosveset trisodium                      | -4.537        | -6.678       |
| C9H13N5O4           | DB01004     | Ganciclovir                                 | -6.654        | -6.654       |
| C5H15N2O3PS         | DB01143     | Amifostine                                  | -5.018        | -6.643       |
| C21H24N4O2S         | DB08893     | Mirabegron                                  | -5.769        | -6.62        |
| C7H9ClO6P2S         | DB01133     | Tiludronic acid                             | -5.18         | -6.57        |
| C14H22N6O5          | DB01610     | Valganciclovir                              | -5.821        | -6.53        |
| C6H12O6             | DB04173     | Fructose                                    | -6.516        | -6.516       |

|                     |         |                             |        |        |
|---------------------|---------|-----------------------------|--------|--------|
| C2H8O7P2            | DB01077 | Etidronic acid              | -5.867 | -6.506 |
| C23H45N5O14         | DB01421 | Paromomycin                 | -5.052 | -6.49  |
| C22H28N4O6          | DB01204 | Mitoxantrone                | -6.464 | -6.464 |
| Al2H4O9Si2          | DB01575 | Kaolin                      | -6.449 | -6.449 |
| C17H34N4O10         | DB03615 | Ribostamycin                | -6.028 | -6.449 |
| C6H17N2O12P4Sm      | DB05273 | Samarium (153Sm) lexidronam | -3.824 | -6.412 |
| C19H26I3N3O9        | DB01362 | Iohexol                     | -6.407 | -6.407 |
| C28H34O15           | DB04703 | Hesperidin                  | -6.378 | -6.378 |
| C10H12FN5O4         | DB01073 | Fludarabine                 | -6.363 | -6.363 |
| C5H9NO4S            | DB04339 | Carbocysteine               | -6.34  | -6.347 |
| C21H39N7O12         | DB01082 | Streptomycin                | -5.437 | -6.276 |
| C18H34N2O6S         | DB01627 | Lincomycin                  | -6.247 | -6.257 |
| C17H25Cl2F3N5O12P3S | DB06441 | Cangrelor                   | -6.175 | -6.189 |
| C14H22N6O5          | DB01610 | Valganciclovir              | -5.955 | -6.169 |
| C23H45N5O14         | DB01421 | Paromomycin                 | -4.315 | -6.165 |
| C27H29NO11          | DB00997 | Doxorubicin                 | -6.126 | -6.153 |
| C23H45N5O14         | DB01421 | Paromomycin                 | -5.471 | -6.102 |
| C17H34N4O10         | DB03615 | Ribostamycin                | -5.34  | -6.06  |
| C28H54N8            | DB06809 | Plerixafor                  | -3.343 | -6.036 |
| C15H24N4O6S2        | DB06211 | Doripenem                   | -5.608 | -6.008 |
| C17H21N4O9P         | DB03247 | Flavin mononucleotide       | -5.9   | -6.006 |
| C47H74O19           | DB01078 | Deslanoside                 | -5.984 | -5.984 |
| C21H27N3O7S         | DB01602 | Bacampicillin               | -5.227 | -5.952 |
| C23H28F2N6O4S       | DB08816 | Ticagrelor                  | -5.715 | -5.937 |
| C12H22O11           | DB04465 | Lactose                     | -5.913 | -5.913 |
| C22H30MnN4O14P2     | DB06796 | Mangafodipir                | -3.425 | -5.869 |
| C18H23NO4           | DB01102 | Arbutamine                  | -5.848 | -5.855 |
| C25H24FNO4          | DB08860 | Pitavastatin                | -5.844 | -5.854 |
| H4O7P2              | DB04160 | Pyrophosphoric acid         | -3.516 | -5.853 |
| C6H10O6             | DB04564 | Gluconolactone              | -5.827 | -5.827 |
| C52H74Cl2O18        | DB08874 | Fidaxomicin                 | -3.114 | -5.796 |
| C25H32F3N3O4        | DB06207 | Silodosin                   | -5.752 | -5.755 |
| C10H14N2O5          | DB01265 | Telbivudine                 | -5.731 | -5.732 |
| C17H21NO4           | DB01288 | Fenoterol                   | -5.707 | -5.728 |
| C21H22Cl2FN5O       | DB08865 | Crizotinib                  | -5.349 | -5.685 |
| C28H54N8            | DB06809 | Plerixafor                  | -4.42  | -5.685 |
| C9H11NO5            | DB06262 | Droxidopa                   | -5.673 | -5.673 |
| C38H50N6O5          | DB01232 | Saquinavir                  | -5.637 | -5.65  |
| C54H69N11O10S2      | DB06791 | Lanreotide                  | -4.94  | -5.65  |
| C22H30MnN4O14P2     | DB06796 | Mangafodipir                | -4.151 | -5.612 |
| C7H9ClO6P2S         | DB01133 | Tiludronic acid             | -5.534 | -5.593 |
| C22H21N8O8PS4       | DB06590 | Ceftaroline fosamil         | -5.268 | -5.569 |
| C19H23N5O3          | DB01157 | Trimetrexate                | -3.298 | -5.565 |
| C2H8O7P2            | DB01077 | Etidronic acid              | -5.315 | -5.561 |
| C9H9Cl2N3O          | DB01018 | Guanfacine                  | -5.519 | -5.519 |
| C28H54N8            | DB06809 | Plerixafor                  | -3.376 | -5.509 |
| C22H21N8O8PS4       | DB06590 | Ceftaroline fosamil         | -4.958 | -5.503 |
| C19H24N2O4          | DB00983 | Formoterol                  | -5.484 | -5.496 |
| C21H24N4O2S         | DB08893 | Mirabegron                  | -5.324 | -5.492 |
| C45H69N11O12S       | DB01282 | Carbetocin                  | -5.48  | -5.48  |
| C14H10N2O6          | DB01250 | Olsalazine                  | -5.479 | -5.479 |
| C9H17NO5            | DB01783 | Pantothenic acid            | -5.471 | -5.472 |
| C12H14N4O4S         | DB01299 | Sulfadoxine                 | -4.381 | -5.47  |
| C17H21NO4           | DB01288 | Fenoterol                   | -2.831 | -5.47  |
| C18H34N2O6S         | DB01627 | Lincomycin                  | -3.051 | -5.463 |
| C22H30MnN4O14P2     | DB06796 | Mangafodipir                | -3.386 | -5.456 |
| C25H22N4O4          | DB06210 | Eltrombopag                 | -5.444 | -5.449 |
| C9H8N2O2            | DB01230 | Pemoline                    | -5.446 | -5.448 |
| C5H15N2O3PS         | DB01143 | Amifostine                  | -5.405 | -5.445 |
| C22H31N3O5          | DB01340 | Cilazapril                  | -4.766 | -5.421 |
| C6H14O6             | DB01638 | Sorbitol                    | -5.405 | -5.405 |
| C28H54N8            | DB06809 | Plerixafor                  | -4.659 | -5.397 |
| C23H23N7O5          | DB06813 | Pralatrexate                | -3.788 | -5.383 |

|                   |         |                        |        |        |
|-------------------|---------|------------------------|--------|--------|
| C20H20N6O9S       | DB04570 | Latamoxef              | -5.372 | -5.373 |
| C20H14I6N2O6      | DB04711 | Iodipamide             | -5.363 | -5.363 |
| C8H8N4            | DB01275 | Hydralazine            | -4.814 | -5.338 |
| C22H30MnN4O14P2   | DB06796 | Mangafodipir           | -4.29  | -5.315 |
| C17H21NO4         | DB01288 | Fenoterol              | -3.097 | -5.314 |
| C8H12N4O4         | DB01262 | Decitabine             | -2.807 | -5.309 |
| C25H34FN3O2       | DB05316 | Pimavanserin           | -5.304 | -5.307 |
| C33H38GdN3Na3O14P | DB06705 | Gadofosveset trisodium | -5.214 | -5.306 |
| H4O7P2            | DB04160 | Pyrophosphoric acid    | -5.052 | -5.286 |
| C19H20N2O3S       | DB01132 | Pioglitazone           | -3.404 | -5.279 |
| C22H24CIN5O2      | DB01184 | Domperidone            | -5.259 | -5.277 |
| C29H44O12         | DB01092 | Ouabain                | -5.26  | -5.26  |
| C23H22F7N4O6P     | DB06717 | Fosaprepitant          | -2.763 | -5.25  |
| C24H26FNO4        | DB01095 | Fluvastatin            | -5.246 | -5.247 |
| C24H26N2O4        | DB01136 | Carvedilol             | -5.18  | -5.223 |
| C52H74N16O15S2    | DB02638 | Terlipressin           | -4.184 | -5.219 |
| C17H17N7O8S4      | DB01330 | Cefotetan              | -5.207 | -5.207 |
| C11H13BrN2O5      | DB03312 | Brivudine              | -5.172 | -5.19  |
| C32H40BrN5O5      | DB01200 | Bromocriptine          | -4.309 | -5.146 |
| C18H18N8O7S3      | DB01212 | Ceftriaxone            | -5.142 | -5.142 |
| C19H21CIFN3O3     | DB06771 | Besifloxacin           | -3.807 | -5.14  |
| C8H11NO2          | DB00988 | Dopamine               | -5.132 | -5.132 |
| C12H20N2O3        | DB01291 | Pirbuterol             | -4.761 | -5.124 |
| C27H33N3O8        | DB01301 | Rolitetraacycline      | -4.184 | -5.122 |
| C9H11NO4          | DB01235 | Levodopa               | -5.099 | -5.099 |
| C6H8O7            | DB04272 | Citric acid            | -5.082 | -5.082 |
| C27H33N3O8        | DB01301 | Rolitetraacycline      | -4.831 | -5.051 |
| C4H3N3O4          | DB03209 | Oteracil               | -2.868 | -5.049 |
| C16H15F6N5O       | DB01261 | Sitagliptin            | -5.037 | -5.04  |
| C6H18N4           | DB06824 | Triethylenetetramine   | -3.32  | -5.038 |
| C15H28N4O4        | DB06614 | Peramivir              | -5.021 | -5.021 |
| C24H21F2NO3       | DB00973 | Ezetimibe              | -5.018 | -5.019 |
| C18H21NO5         | DB06814 | Protokylol             | -2.704 | -5.012 |
| C4H3N3O4          | DB03209 | Oteracil               | -2.526 | -5.005 |
| C38H52N6O7        | DB01072 | Atazanavir             | -4.964 | -4.972 |
| C19H24N2O4        | DB01274 | Arformoterol           | -2.657 | -4.965 |
| C18H23NO4         | DB01102 | Arbutamine             | -2.231 | -4.944 |
| C16H18FN3O2       | DB04953 | Ezogabine              | -2.346 | -4.928 |
| C10H13N3          | DB04840 | Debrisoquine           | -4.919 | -4.919 |
| C3H7NO3           | DB03929 | D-Serine               | -4.917 | -4.917 |
| C35H44I6N6O15     | DB01249 | Iodixanol              | -4.915 | -4.915 |
| C18H33CIN2O5S     | DB01190 | Clindamycin            | -4.903 | -4.914 |
| C40H59NO11        | DB08871 | Eribulin               | -2.341 | -4.912 |
| C8H10IN3          | DB06704 | Iobenguane             | -4.907 | -4.907 |
| C13H18Cl2N2O2     | DB01042 | Melphalan              | -4.9   | -4.9   |
| C18H21NO5         | DB06814 | Protokylol             | -4.882 | -4.894 |
| C6H18N4           | DB06824 | Triethylenetetramine   | -4.807 | -4.894 |
| C18H28N2O4        | DB01193 | Acebutolol             | -4.873 | -4.874 |
| C16H19N3O4S       | DB01333 | Cefradine              | -4.592 | -4.869 |
| C25H34O6          | DB05013 | Ingenol mebutate       | -4.858 | -4.858 |
| C15H18N8O5        | DB06213 | Regadenoson            | -4.856 | -4.856 |
| C9H7N7O2S         | DB00993 | Azathioprine           | -3.108 | -4.85  |
| C30H34N2O3        | DB06401 | Bazedoxifene           | -2.379 | -4.835 |
| C53H67N9O10S      | DB01369 | Quinupristin           | -2.877 | -4.83  |
| C31H36N2O11       | DB01051 | Novobiocin             | -2.403 | -4.828 |
| C12H18N2O2S       | DB01154 | Thiamylal              | -4.783 | -4.823 |
| C12H18N4O7P2S     | DB01987 | Coccarboxylase         | -4.716 | -4.806 |
| C14H8O4           | DB04816 | Dantron                | -4.8   | -4.8   |
| C9H13N3O5         | DB00987 | Cytarabine             | -4.784 | -4.784 |
| C16H15N2O6P       | DB01320 | Fosphenytoin           | -4.727 | -4.776 |
| C15H25N3O         | DB01255 | Lisdexamfetamine       | -4.678 | -4.773 |
| C18H18N6O8S3      | DB01328 | Cefonicid              | -4.757 | -4.757 |
| C17H19N5O2        | DB06193 | Pixantrone             | -4.74  | -4.74  |

|                 |         |                           |        |        |
|-----------------|---------|---------------------------|--------|--------|
| C24H25ClFN5O3   | DB08916 | Afatinib                  | -2.92  | -4.735 |
| C21H25ClO6      | DB06292 | Dapagliflozin             | -4.731 | -4.731 |
| C16H22N2O3      | DB01366 | Procaterol                | -2.87  | -4.73  |
| C12H21N3O5S3    | DB01194 | Brinzolamide              | -2.399 | -4.715 |
| C9H13NO3        | DB06707 | Levonordefrin             | -2.619 | -4.714 |
| C22H30MnN4O14P2 | DB06796 | Mangafodipir              | -2.356 | -4.705 |
| C23H27N3O7      | DB01017 | Minocycline               | -4.587 | -4.698 |
| C19H33NO2       | DB08868 | Fingolimod                | -4.652 | -4.695 |
| C7H10N2O2S      | DB06795 | Mafenide                  | -4.662 | -4.692 |
| C20H33NO3       | DB04822 | Oxeladin                  | -4.683 | -4.69  |
| C26H27N5O2      | DB06684 | Vilazodone                | -4.583 | -4.685 |
| C23H18ClF2N3O3S | DB08881 | Vemurafenib               | -4.236 | -4.68  |
| C35H35F2N8O5S   | DB06636 | Isavuconazonium           | -2.773 | -4.677 |
| C13H21O5P       | DB06716 | Fospropofol               | -3.266 | -4.675 |
| C24H25FO5S      | DB08907 | Canagliflozin             | -4.666 | -4.666 |
| C8H12N4O4       | DB01262 | Decitabine                | -4.237 | -4.656 |
| C20H32F2O5      | DB01046 | Lubiprostone              | -4.649 | -4.652 |
| C29H39NO9       | DB04865 | Omacetaxine mepesuccinate | -3.602 | -4.639 |
| C5H4N4S         | DB01033 | Mercaptopurine            | -4.516 | -4.631 |
| C19H25NOS       | DB05271 | Rotigotine                | -1.909 | -4.627 |
| C17H15N3O6      | DB01014 | Balsalazide               | -4.624 | -4.625 |
| C6H13NO5        | DB01296 | Glucosamine               | -4.453 | -4.62  |
| C18H26ClN3O     | DB01611 | Hydroxychloroquine        | -2.376 | -4.617 |
| C15H22FN3O6     | DB01101 | Capecitabine              | -4.604 | -4.604 |
| C22H25F2NO4     | DB04861 | Nebivolol                 | -4.553 | -4.573 |
| C10H22N4        | DB01170 | Guanethidine              | -4.547 | -4.569 |
| C12H21N3O5S3    | DB01194 | Brinzolamide              | -2.83  | -4.564 |
| C22H29N3O6S     | DB01604 | Pivampicillin             | -3.841 | -4.562 |
| C5H9N3          | DB05381 | Histamine                 | -4.054 | -4.561 |
| C25H27N9O8S2    | DB01329 | Cefoperazone              | -4.549 | -4.549 |
| C24H34N2O       | DB01244 | Bepidil                   | -4.548 | -4.548 |
| C22H22F3N       | DB01012 | Cinacalcet                | -4.531 | -4.542 |
| C6H13NO4        | DB05018 | Migalstat                 | -4.538 | -4.54  |
| C16H15N2O6P     | DB01320 | Fosphenytoin              | -3.007 | -4.54  |
| C23H20F3N5O2S2  | DB08912 | Dabrafenib                | -4.132 | -4.537 |
| C5H9NO4S        | DB04339 | Carbocisteine             | -1.838 | -4.532 |
| C19H20N2O3S     | DB01132 | Pioglitazone              | -4.086 | -4.526 |
| C21H23N3O2      | DB06603 | Panobinostat              | -4.524 | -4.524 |
| C15H25N3O       | DB01255 | Lisdexamfetamine          | -3.384 | -4.517 |
| C6H5GaO7        | DB06784 | Gallium citrate Ga 67     | -4.516 | -4.516 |
| C25H36N6O4S     | DB06267 | Udenafil                  | -4.51  | -4.515 |
| C22H29FO5       | DB01234 | Dexamethasone             | -4.514 | -4.514 |
| C12H20N2O3      | DB01291 | Pirbuterol                | -3.988 | -4.513 |
| C16H21Cl2N3O2   | DB06769 | Bendamustine              | -4.029 | -4.473 |
| C23H28F2N6O4S   | DB08816 | Ticagrelor                | -3.752 | -4.467 |
| C23H26ClN7O3    | DB06237 | Avanafil                  | -2.182 | -4.466 |
| C12H18N2O2S     | DB01154 | Thiamylal                 | -2.439 | -4.464 |
| C4H4FN3O        | DB01099 | Flucytosine               | -4.46  | -4.46  |
| C11H13BrN2O5    | DB03312 | Brivudine                 | -2.378 | -4.447 |
| C24H28F3N3O3    | DB06608 | Tafenoquine               | -4.437 | -4.444 |
| C19H20ClNO4     | DB01393 | Bezafibrate               | -4.438 | -4.438 |
| C35H35F2N8O5S   | DB06636 | Isavuconazonium           | -2.661 | -4.434 |
| C23H16O11       | DB01003 | Cromoglicic acid          | -4.433 | -4.433 |
| C41H64O13       | DB01396 | Digitoxin                 | -4.428 | -4.428 |
| C19H26N2S       | DB01186 | Pergolide                 | -2.088 | -4.428 |
| C6H10N2O5       | DB06775 | Carglumic acid            | -4.424 | -4.424 |
| C16H24N10O4     | DB01223 | Aminophylline             | -4.391 | -4.423 |
| C5H4N4S         | DB01033 | Mercaptopurine            | -3.379 | -4.418 |
| C19H23N5O3      | DB01157 | Trimetrexate              | -2.386 | -4.415 |
| C19H19ClN2      | DB00967 | Desloratadine             | -4.411 | -4.413 |
| C2H4Cl3O4P      | DB06753 | Triclofos                 | -4.346 | -4.41  |
| C54H69N11O10S2  | DB06791 | Lanreotide                | -4.196 | -4.409 |
| C7H7NO2         | DB08797 | Salicylamide              | -2.76  | -4.407 |

|                |         |                  |        |        |
|----------------|---------|------------------|--------|--------|
| C15H22N2O      | DB08918 | Levomilnacipran  | -4.403 | -4.404 |
| C28H54N8       | DB06809 | Plerixafor       | -2.259 | -4.404 |
| C35H35F2N8O5S  | DB06636 | Isavuconazonium  | -3.9   | -4.403 |
| C19H24N2O4     | DB01274 | Arformoterol     | -4.388 | -4.401 |
| C5H9NO3S       | DB06823 | Tiopronin        | -2.071 | -4.393 |
| C9H15NO3S      | DB01197 | Captopril        | -4.386 | -4.386 |
| C23H30GdN3O11  | DB08884 | Gadoxetic acid   | -3.497 | -4.383 |
| C22H29N3O6S    | DB01604 | Pivampicillin    | -4.172 | -4.38  |
| C6H12O6        | DB01914 | D-glucose        | -4.376 | -4.376 |
| C12H14N4O4S    | DB06150 | Sulfadimethoxine | -3.301 | -4.375 |
| C18H18N6O5S2   | DB01326 | Cefamandole      | -4.371 | -4.371 |
| C14H10N4O5     | DB01219 | Dantrolene       | -3.086 | -4.367 |
| C10H13NO4      | DB00968 | Methyl dopa      | -4.362 | -4.362 |
| C14H10O5       | DB01399 | Salsalate        | -2.467 | -4.361 |
| C24H28N2O3     | DB05039 | Indacaterol      | -4.312 | -4.355 |
| C17H20N2S      | DB01069 | Promethazine     | -4.353 | -4.354 |
| C12H20N2O3     | DB01291 | Pirbuterol       | -2.528 | -4.353 |
| C10H16N2O8     | DB00974 | Edetic Acid      | -2.136 | -4.351 |
| C5H9N3         | DB05381 | Histamine        | -3.018 | -4.349 |
| C15H15NO2S     | DB06413 | Armodafinil      | -4.337 | -4.337 |
| C52H74Cl2O18   | DB08874 | Fidaxomicin      | -4.315 | -4.333 |
| C18H33ClN2O5S  | DB01190 | Clindamycin      | -1.976 | -4.332 |
| C17H19FN2O2    | DB06654 | Safinamide       | -4.142 | -4.327 |
| C17H18N4O      | DB00969 | Alosetron        | -3.292 | -4.326 |
| C23H30GdN3O11  | DB08884 | Gadoxetic acid   | -2.602 | -4.325 |
| C19H18N6O5S3   | DB01066 | Cefditoren       | -4.323 | -4.323 |
| C56H87NO16     | DB06287 | Temsirolimus     | -4.306 | -4.307 |
| C45H57NO14     | DB06772 | Cabazitaxel      | -4.297 | -4.299 |
| C14H20N2O2     | DB00960 | Pindolol         | -4.294 | -4.295 |
| C16H17N3O5S    | DB01140 | Cefadroxil       | -4.073 | -4.282 |
| C16H23N5O      | DB01079 | Tegaserod        | -4.272 | -4.272 |
| C24H32O6       | DB01260 | Desonide         | -4.265 | -4.265 |
| C24H28N2O3     | DB05039 | Indacaterol      | -2.481 | -4.262 |
| C20H14O4       | DB04824 | Phenolphthalein  | -3.436 | -4.26  |
| C11H6ClN3O6    | DB06794 | Lodoxamide       | -4.258 | -4.258 |
| C18H18ClNS     | DB01239 | Chlorprothixene  | -4.244 | -4.248 |
| C9H7N7O2S      | DB00993 | Azathioprine     | -3.878 | -4.248 |
| C8H12N2        | DB06698 | Betahistine      | -4.245 | -4.245 |
| C17H18N4O      | DB00969 | Alosetron        | -3.943 | -4.238 |
| C15H14N4O6S2   | DB01415 | Ceftibuten       | -4.23  | -4.23  |
| C28H54N8       | DB06809 | Plerixafor       | -1.799 | -4.228 |
| C10H22N4       | DB01170 | Guanethidine     | -2.26  | -4.223 |
| C18H27NO3      | DB06774 | Capsaicin        | -4.218 | -4.219 |
| C43H51N3O11    | DB01220 | Rifaximin        | -3.417 | -4.212 |
| C38H50N6O5     | DB01232 | Saquinavir       | -1.952 | -4.212 |
| C21H15N3O4     | DB01609 | Deferasirox      | -4.203 | -4.209 |
| C6H13NO5       | DB01296 | Glucosamine      | -3.366 | -4.2   |
| C26H27NO9      | DB01177 | Idarubicin       | -2.357 | -4.197 |
| C20H24N2       | DB08801 | Dimetindene      | -3.677 | -4.191 |
| C15H14N2O2     | DB06802 | Nepafenac        | -4.186 | -4.186 |
| C18H20FN5O4    | DB01155 | Gemifloxacin     | -2.583 | -4.186 |
| C23H30GdN3O11  | DB08884 | Gadoxetic acid   | -3.13  | -4.183 |
| C29H26ClFN4O4S | DB01259 | Lapatinib        | -3.01  | -4.178 |
| C9H7N7O2S      | DB00993 | Azathioprine     | -3.649 | -4.175 |
| C23H23N3O5     | DB01030 | Topotecan        | -3.344 | -4.175 |
| C16H14N2O4     | DB01025 | Amlexanox        | -2.054 | -4.167 |
| C5H6N2         | DB06637 | Dalfampridine    | -4.154 | -4.158 |
| C23H30GdN3O11  | DB08884 | Gadoxetic acid   | -1.699 | -4.155 |
| C24H28N2O3     | DB05039 | Indacaterol      | -1.816 | -4.154 |
| C37H42F2N8O4   | DB01263 | Posaconazole     | -4.132 | -4.15  |
| C16H24N10O4    | DB01223 | Aminophylline    | -2.31  | -4.143 |
| C20H29FO3      | DB01185 | Fluoxymesterone  | -4.142 | -4.142 |
| C19H25N5O4     | DB01162 | Terazosin        | -1.897 | -4.126 |

|               |         |                           |        |        |
|---------------|---------|---------------------------|--------|--------|
| C11H17NO3     | DB01064 | Isoprenaline              | -4.124 | -4.124 |
| C17H20O6      | DB01024 | Mycophenolic acid         | -4.091 | -4.122 |
| C16H24N2O2    | DB01618 | Molindone                 | -2.657 | -4.122 |
| C18H20FN5O4   | DB01155 | Gemifloxacin              | -4.075 | -4.116 |
| C4H3N3O4      | DB03209 | Oteracil                  | -4.03  | -4.109 |
| C16H20N6O     | DB08895 | Tofacitinib               | -4.088 | -4.099 |
| C27H29F3O6S   | DB08906 | Fluticasone furoate       | -4.092 | -4.092 |
| C11H11N5      | DB01438 | Phenazopyridine           | -4.082 | -4.088 |
| C24H26N2O4    | DB01136 | Carvedilol                | -2.512 | -4.086 |
| C10H15NO      | DB01364 | Ephedrine                 | -4.079 | -4.085 |
| C30H32N2O2    | DB01081 | Diphenoxylate             | -3.7   | -4.084 |
| C53H83NO14    | DB01590 | Everolimus                | -4.082 | -4.083 |
| C20H23N5O6S   | DB01061 | Azlocillin                | -4.081 | -4.081 |
| C12H18N4O7P2S | DB01987 | Cocarboxylase             | -1.956 | -4.078 |
| C22H25CIN2OS  | DB01624 | Zuclopenthixol            | -3.847 | -4.075 |
| C20H31NO4     | DB06217 | Vernakalant               | -1.348 | -4.074 |
| C3H6O3        | DB04398 | Lactic acid               | -4.072 | -4.073 |
| C13H21O5P     | DB06716 | Fospropofol               | -3.995 | -4.052 |
| C21H32N2O     | DB06718 | Stanozolol                | -3.661 | -4.051 |
| C16H20N6O     | DB08895 | Tofacitinib               | -1.709 | -4.05  |
| C9H13NO3      | DB06707 | Levonordefrin             | -4.024 | -4.041 |
| C17H20O6      | DB01024 | Mycophenolic acid         | -2.264 | -4.023 |
| C15H18N2O     | DB04864 | Huperzine A               | -2.902 | -4.021 |
| C15H24N4O6S2  | DB06211 | Doripenem                 | -3.587 | -4.009 |
| C11H16CIN5    | DB01131 | Proguanil                 | -2.017 | -4.003 |
| C20H32O5      | DB01240 | Epoprostenol              | -3.998 | -4     |
| C8H14N2O2     | DB01202 | Levetiracetam             | -3.999 | -3.999 |
| C14H16N2O6S3  | DB01145 | Sulfoxone                 | -3.998 | -3.998 |
| C14H17N3O     | DB00998 | Frovatriptan              | -3.995 | -3.995 |
| C43H74N2O14   | DB06145 | Spiramycin                | -1.456 | -3.991 |
| C5H9NO3S      | DB06151 | Acetylcysteine            | -3.978 | -3.978 |
| C12H6Cl4O2S   | DB04813 | Bithionol                 | -2.417 | -3.966 |
| C6H11NO3      | DB00992 | Methyl aminolevulinate    | -3.61  | -3.962 |
| C20H33N3O4    | DB04846 | Celiprolol                | -3.96  | -3.961 |
| C13H11N3O4    | DB08910 | Pomalidomide              | -3.958 | -3.958 |
| C14H10O5      | DB01399 | Salsalate                 | -3.932 | -3.956 |
| C22H30N2O5S2  | DB01348 | Spirapril                 | -3.799 | -3.941 |
| C21H25N3O2S   | DB01224 | Quetiapine                | -3.841 | -3.93  |
| C18H19N3O5S   | DB01150 | Cefprozil                 | -3.648 | -3.93  |
| C14H12O3      | DB01428 | Oxybenzone                | -3.892 | -3.928 |
| C16H14F3N3O2S | DB05351 | Dexlansoprazole           | -3.888 | -3.908 |
| C18H21N3O3S   | DB01129 | Rabeprazole               | -2.204 | -3.905 |
| C34H50N4O9S   | DB01764 | Dalfopristin              | -3.234 | -3.892 |
| C8H7CIN2O2S   | DB01119 | Diazoxide                 | -3.881 | -3.889 |
| C13H11N3      | DB01123 | Proflavine                | -3.855 | -3.886 |
| C23H30GdN3O11 | DB08884 | Gadoxetic acid            | -3.491 | -3.879 |
| C18H20FN3O4   | DB01165 | Ofloxacin                 | -3.735 | -3.878 |
| C33H35FN2O5   | DB01076 | Atorvastatin              | -3.868 | -3.87  |
| C19H21NO4     | DB01183 | Naloxone                  | -2.781 | -3.868 |
| C18H15NO3     | DB00991 | Oxaprozin                 | -3.864 | -3.865 |
| C15H16Cl2N2O8 | DB07565 | Chloramphenicol succinate | -3.862 | -3.863 |
| C16H18FN3O3   | DB01059 | Norfloxacin               | -3.76  | -3.859 |
| C17H19FN2O2   | DB06654 | Safinamide                | -3.069 | -3.847 |
| C22H28FN3O6S  | DB01098 | Rosuvastatin              | -3.843 | -3.845 |
| C12H12N2O3    | DB01174 | Phenobarbital             | -3.664 | -3.835 |
| C11H14CIN     | DB04871 | Lorcaserin                | -3.833 | -3.834 |
| C15H14N4O2S   | DB06729 | Sulfaphenazole            | -3.779 | -3.832 |
| C27H29NO11    | DB00997 | Doxorubicin               | -1.982 | -3.822 |
| C23H22F7N4O6P | DB06717 | Fosaprepitant             | -1.299 | -3.818 |
| C17H25NO3     | DB01210 | Levobunolol               | -3.814 | -3.815 |
| C15H22O3      | DB01241 | Gemfibrozil               | -3.8   | -3.803 |
| C22H25F2NO4   | DB04861 | Nebivolol                 | -1.776 | -3.8   |
| C3H7NO2       | DB04827 | Urethane                  | -3.799 | -3.799 |



|                 |         |                        |        |        |
|-----------------|---------|------------------------|--------|--------|
| C18H20FN3O4     | DB01137 | Levofloxacin           | -3.653 | -3.797 |
| C23H18CIF2N3O3S | DB08881 | Vemurafenib            | -3.417 | -3.796 |
| C9H5Cl2NO       | DB01243 | Chloroxine             | -2.844 | -3.792 |
| C27H36O8        | DB01130 | Prednicarbate          | -3.79  | -3.79  |
| C16H17BrN2      | DB04832 | Zimelidine             | -3.755 | -3.788 |
| C30H21I7N2Na2O8 | DB01583 | Liotrix                | -2.796 | -3.784 |
| C31H48O6        | DB02703 | Fusidic acid           | -1.755 | -3.784 |
| C17H26N4O       | DB01084 | Emedastine             | -3.488 | -3.782 |
| C16H19N3O5S     | DB01060 | Amoxicillin            | -3.587 | -3.779 |
| C19H25N5O4      | DB01162 | Terazosin              | -2.702 | -3.776 |
| C7H9NO2         | DB08826 | Deferiprone            | -3.775 | -3.775 |
| C28H54N8        | DB06809 | Plerixafor             | -1.585 | -3.774 |
| C23H22F7N4O6P   | DB06717 | Fosaprepitant          | -3.321 | -3.766 |
| C15H16N2O6S2    | DB01607 | Ticarcillin            | -3.761 | -3.761 |
| C20H24O2        | DB00977 | Ethinylestradiol       | -3.759 | -3.759 |
| C2H4O3          | DB03085 | Glycolic acid          | -3.757 | -3.757 |
| C16H14O3        | DB01009 | Ketoprofen             | -3.753 | -3.753 |
| C25H34O6        | DB01222 | Budesonide             | -3.752 | -3.752 |
| C18H14F4N2O4S   | DB01128 | Bicalutamide           | -3.739 | -3.739 |
| C9H13N          | DB01576 | Dextroamphetamine      | -3.737 | -3.737 |
| C10H8F2N4O      | DB06201 | Rufinamide             | -3.733 | -3.733 |
| C17H25NO3       | DB00979 | Cyclopentolate         | -1.708 | -3.732 |
| C16H32O2        | DB03796 | Palmitic Acid          | -3.723 | -3.727 |
| H4O7P2          | DB04160 | Pyrophosphoric acid    | -3.021 | -3.722 |
| C19H20N2O3S     | DB01132 | Pioglitazone           | -3.237 | -3.72  |
| C17H27NO4       | DB01203 | Nadolol                | -3.714 | -3.715 |
| C22H26ClN7O2S   | DB01254 | Dasatinib              | -3.292 | -3.714 |
| C17H17ClN6O3    | DB01198 | Zopiclone              | -3.359 | -3.709 |
| C13H21NO3       | DB01001 | Salbutamol             | -3.706 | -3.706 |
| C13H15N3O4S     | DB01382 | Glymidine              | -3.257 | -3.702 |
| C7H7NO2         | DB08797 | Salicylamide           | -3.662 | -3.7   |
| C12H18N4O7P2S   | DB01987 | Coccarboxylase         | -2.413 | -3.698 |
| C4H3N3O4        | DB03209 | Oteracil               | -2.166 | -3.697 |
| C13H18ClNO      | DB01156 | Bupropion              | -3.458 | -3.696 |
| C53H67N9O10S    | DB01369 | Quinupristin           | -3.223 | -3.696 |
| C27H33N3O8      | DB01301 | Rolitetraacycline      | -2.104 | -3.688 |
| C14H10BNO3      | DB05219 | Crisaborole            | -3.682 | -3.682 |
| C10H16N2O3      | DB01353 | Butobarbital           | -3.646 | -3.681 |
| C6H9NO6         | DB01020 | Isosorbide Mononitrate | -3.669 | -3.669 |
| C10H7F3O4       | DB08814 | Triflusal              | -3.668 | -3.668 |
| C13H10N2O4      | DB01041 | Thalidomide            | -3.667 | -3.667 |
| C6H11NO3        | DB00992 | Methyl aminolevulinate | -3.177 | -3.652 |
| C21H26NO4       | DB06800 | Methylnaltrexone       | -1.071 | -3.637 |
| C20H26N2O2      | DB01426 | Ajmaline               | -3.135 | -3.633 |
| C13H18N2O3      | DB06218 | Lacosamide             | -3.631 | -3.631 |
| C14H12O3        | DB02709 | Resveratrol            | -3.63  | -3.63  |
| C32H31BrN2O2    | DB08903 | Bedaquiline            | -3.626 | -3.63  |
| C20H26N2O2      | DB01426 | Ajmaline               | -3.198 | -3.625 |
| C8H11NO4S2      | DB05057 | Erdosteine             | -3.621 | -3.621 |
| C17H27NO4       | DB01214 | Metipranolol           | -3.619 | -3.621 |
| C21H25NO3       | DB06230 | Nalmefene              | -1.671 | -3.618 |
| C26H26F2N2      | DB04841 | Flunarizine            | -3.528 | -3.616 |
| C11H16N2O       | DB01056 | Tocainide              | -3.459 | -3.616 |
| C16H23NO        | DB01209 | Dezocine               | -3.606 | -3.606 |
| C16H18FN3O3     | DB01059 | Norfloxacin            | -2.496 | -3.601 |
| C18H20FN3O4     | DB01165 | Ofloxacin              | -2.38  | -3.601 |
| C31H48O6        | DB02703 | Fusidic acid           | -3.579 | -3.599 |
| C20H27N         | DB01616 | Alverine               | -3.593 | -3.594 |
| C5H9NO3S        | DB06823 | Tiopronin              | -3.578 | -3.589 |
| C10H16NO        | DB01010 | Edrophonium            | -2.291 | -3.582 |
| C4H11NO3        | DB03754 | Tromethamine           | -2.927 | -3.579 |
| C2H4Cl3O4P      | DB06753 | Triclofos              | -2.232 | -3.578 |
| C13H15N3O4S     | DB01382 | Glymidine              | -3.194 | -3.575 |

|                 |         |                        |        |        |
|-----------------|---------|------------------------|--------|--------|
| C12H6Cl4O2S     | DB04813 | Bithionol              | -3.042 | -3.573 |
| C16H26N2O5S     | DB01597 | Cilastatin             | -0.863 | -3.573 |
| C16H22N2O3      | DB01366 | Procaterol             | -3.545 | -3.571 |
| C23H23N3O5      | DB01030 | Topotecan              | -3.296 | -3.564 |
| C25H24FNO4      | DB08860 | Pitavastatin           | -1.105 | -3.561 |
| C21H22Cl2FN5O   | DB08865 | Crizotinib             | -3.06  | -3.556 |
| C21H25NO3       | DB06230 | Nalmefene              | -3.522 | -3.553 |
| C16H19N3O5S     | DB01060 | Amoxicillin            | -2.784 | -3.55  |
| C23H27N         | DB01091 | Butenafine             | -3.413 | -3.547 |
| C23H23N3O5      | DB01030 | Topotecan              | -2.27  | -3.547 |
| C21H26NO4       | DB06800 | Methylalantrexone      | -3.529 | -3.537 |
| C11H16N2O       | DB01056 | Tocainide              | -2.676 | -3.537 |
| C20H21FN6O5     | DB06817 | Raltegravir            | -2.943 | -3.536 |
| C11H18N2O3      | DB01351 | Amobarbital            | -1.812 | -3.526 |
| C19H28NO3       | DB00986 | Glycopyrronium         | -3.519 | -3.519 |
| C39H37F6N3O2    | DB08827 | Lomitapide             | -3.509 | -3.512 |
| C17H14Cl2F2N2O3 | DB01656 | Roflumilast            | -3.511 | -3.511 |
| C19H22NO4S2     | DB01409 | Tiotropium             | -3.489 | -3.489 |
| C28H24FN3O5     | DB08875 | Cabozantinib           | -3.436 | -3.481 |
| C23H27FN4O3     | DB01267 | Paliperidone           | -1.059 | -3.481 |
| C22H22N2O4      | DB06403 | Ambrisentan            | -3.48  | -3.48  |
| C9H5ClINO       | DB04815 | Clioquinol             | -2.683 | -3.473 |
| C22H30MnN4O14P2 | DB06796 | Mangafodipir           | -2.125 | -3.472 |
| C3H8OS2         | DB06782 | Dimercaprol            | -0.807 | -3.463 |
| C19H23N3O2      | DB01253 | Ergometrine            | -3.208 | -3.462 |
| C18H20FN3O4     | DB01165 | Ofloxacin              | -1.92  | -3.462 |
| C20H21NO4       | DB01113 | Papaverine             | -3.369 | -3.46  |
| C16H14N2O4      | DB01025 | Amlexanox              | -3.432 | -3.449 |
| C19H24N6O5S2    | DB01413 | Cefepime               | -3.444 | -3.444 |
| C20H24N2        | DB08801 | Dimetindene            | -3.058 | -3.444 |
| C17H19NO4       | DB01192 | Oxymorphone            | -3.32  | -3.44  |
| C22H22O8        | DB01179 | Podofilox              | -3.438 | -3.438 |
| C17H11N5        | DB01006 | Letrozole              | -3.437 | -3.437 |
| C10H17NO2       | DB01107 | Methyprylon            | -3.436 | -3.436 |
| C22H18N6        | DB08864 | Rilpivirine            | -3.432 | -3.432 |
| C15H13ClFNO2    | DB01283 | Lumiracoxib            | -3.429 | -3.431 |
| C20H30O2        | DB06710 | Methyltestosterone     | -3.427 | -3.427 |
| C7H7NO2         | DB02362 | Aminobenzoic acid      | -3.424 | -3.426 |
| C17H17N3O6S2    | DB01139 | Cefapirin              | -3.41  | -3.419 |
| C12H13N3O2      | DB01247 | Isocarboxazid          | -3.417 | -3.417 |
| C23H22F7N4O6P   | DB06717 | Fosaprepitant          | -3.003 | -3.415 |
| C20H14O4        | DB04824 | Phenolphthalein        | -3.233 | -3.403 |
| C21H23N7O2S     | DB06589 | Pazopanib              | -0.759 | -3.401 |
| C23H29N3O2S     | DB01063 | Acetophenazine         | -1.427 | -3.397 |
| C19H25NO2       | DB06152 | Nylidrin               | -3.387 | -3.395 |
| C12H7Cl3O2      | DB08604 | Triclosan              | -2.835 | -3.394 |
| C16H17BrN2      | DB04832 | Zimelidine             | -1.673 | -3.393 |
| C21H27NO3       | DB01182 | Propafenone            | -3.389 | -3.392 |
| C27H42N2O5S     | DB04845 | Ixabepilone            | -3.387 | -3.392 |
| C28H29NO4S      | DB06249 | Arzoxifene             | -0.929 | -3.392 |
| C15H18N2O       | DB04864 | Huperzine A            | -3.288 | -3.385 |
| C7H10N2O2S      | DB06795 | Mafenide               | -1.591 | -3.381 |
| C24H28N2O3      | DB08820 | Ivacaftor              | -3.379 | -3.379 |
| C23H26ClN7O3    | DB06237 | Avanafil               | -1.482 | -3.379 |
| C16H13Cl2NO4    | DB06736 | Aceclofenac            | -3.378 | -3.378 |
| C22H24N2O7S     | DB05676 | Apremilast             | -3.37  | -3.37  |
| C27H44O2        | DB01436 | Alfacalcidol           | -3.368 | -3.368 |
| C24H45NO8       | DB01160 | Dinoprost tromethamine | -3.365 | -3.368 |
| C21H25ClN2O3    | DB04890 | Bepotastine            | -3.362 | -3.367 |
| C22H30O5        | DB00959 | Methylprednisolone     | -3.362 | -3.362 |
| C16H17N3O7S2    | DB01331 | Cefoxitin              | -3.349 | -3.349 |
| C14H10F3NO2     | DB02266 | Flufenamic Acid        | -3.346 | -3.347 |
| C18H20FN3O4     | DB01137 | Levofloxacin           | -2.114 | -3.335 |

|                 |         |                           |        |        |
|-----------------|---------|---------------------------|--------|--------|
| C21H26NO3       | DB04843 | Mepenzolate               | -3.332 | -3.332 |
| C28H54N8        | DB06809 | Plerixafor                | -1.269 | -3.324 |
| C30H21I7N2Na2O8 | DB01583 | Liotrix                   | -3.199 | -3.322 |
| C22H18N4OS      | DB06626 | Axitinib                  | -3.318 | -3.321 |
| C14H16O3        | DB01322 | Kava                      | -3.317 | -3.317 |
| C32H38N2O8      | DB01089 | Deserpidine               | -1.59  | -3.315 |
| C19H21NO4       | DB01183 | Naloxone                  | -3.19  | -3.314 |
| C28H29F2N3O     | DB01100 | Pimozide                  | -3.301 | -3.308 |
| C11H16ClN5      | DB01131 | Proguanil                 | -1.259 | -3.308 |
| C16H17N3O5S     | DB01140 | Cefadroxil                | -2.582 | -3.306 |
| C7H15Cl2N2O2P   | DB01181 | Ifosfamide                | -3.305 | -3.305 |
| C11H16ClN5      | DB01131 | Proguanil                 | -1.04  | -3.305 |
| C21H27NO        | DB01231 | Diphenidol                | -3.303 | -3.304 |
| C19H21ClFN3O3   | DB06771 | Besifloxacin              | -3.237 | -3.303 |
| C17H19N5        | DB01217 | Anastrozole               | -3.299 | -3.299 |
| C25H43N13O10    | DB06827 | Viomycin                  | -2.888 | -3.299 |
| C19H21NS        | DB06153 | Pizotifen                 | -3.288 | -3.296 |
| C7H8O           | DB06770 | Benzyl alcohol            | -3.293 | -3.293 |
| CH4N2O2         | DB01005 | Hydroxyurea               | -3.284 | -3.292 |
| C26H23FIN5O4    | DB08911 | Trametinib                | -3.286 | -3.286 |
| C16H16N4O8S     | DB01112 | Cefuroxime                | -3.283 | -3.283 |
| C13H18Br2N2O    | DB06742 | Ambroxol                  | -3.273 | -3.283 |
| C16H15ClN2OS    | DB01559 | Clotiazepam               | -3.279 | -3.28  |
| C17H25NO3       | DB00979 | Cyclopentolate            | -3.26  | -3.28  |
| C5H7NO3         | DB03088 | Pidolic Acid              | -3.276 | -3.276 |
| C34H50N4O9S     | DB01764 | Dalfopristin              | -3.031 | -3.268 |
| C23H26ClN7O3    | DB06237 | Avanafil                  | -3.223 | -3.261 |
| C23H28F2N6O4S   | DB08816 | Ticagrelor                | -0.722 | -3.259 |
| C31H36N2O11     | DB01051 | Novobiocin                | -0.56  | -3.259 |
| C16H16N2O3S     | DB04854 | Febuxostat                | -3.252 | -3.253 |
| C10H14O         | DB02513 | Thymol                    | -3.252 | -3.252 |
| C22H24BrFN4O2   | DB05294 | Vandetanib                | -3.248 | -3.248 |
| C52H74Cl2O18    | DB08874 | Fidaxomicin               | -0.762 | -3.247 |
| C15H17N5O6S2    | DB01416 | Cefpodoxime               | -3.246 | -3.246 |
| C12H18Cl2N2O    | DB01407 | Clenbuterol               | -3.239 | -3.24  |
| C6H6N2O         | DB02701 | Nicotinamide              | -3.235 | -3.235 |
| C4H8O3          | DB01440 | gamma-Hydroxybutyric acid | -3.229 | -3.231 |
| C25H32N2O4      | DB06274 | Alvimopan                 | -3.224 | -3.228 |
| C17H19F2N3O3    | DB00978 | Lomefloxacin              | -3.148 | -3.218 |
| C21H32O3        | DB06412 | Oxymetholone              | -2.447 | -3.217 |
| C26H28Cl2N4O4   | DB01026 | Ketoconazole              | -2.664 | -3.213 |
| C13H17N         | DB01037 | Selegiline                | -2.097 | -3.195 |
| C11H12N4O2S     | DB01581 | Sulfamerazine             | -0.771 | -3.195 |
| ClH4N           | DB06767 | Ammonium chloride         | -3.191 | -3.193 |
| C22H32O4        | DB01088 | Iloprost                  | -3.19  | -3.193 |
| C10H16N2O3      | DB01353 | Butobarbital              | -1.505 | -3.193 |
| C21H25ClN2O3    | DB06282 | Levocetirizine            | -1.323 | -3.182 |
| C40H57N5O7      | DB08889 | Carfilzomib               | -3.177 | -3.18  |
| C22H23NO7       | DB06174 | Noscapine                 | -3.013 | -3.18  |
| C32H40BrN5O5    | DB01200 | Bromocriptine             | -0.584 | -3.174 |
| C9H23NO3PS      | DB01057 | Echothiophate             | -3.172 | -3.172 |
| C25H25N5O4      | DB06605 | Apixaban                  | -3.171 | -3.171 |
| C17H18N6        | DB08877 | Ruxolitinib               | -3.169 | -3.169 |
| C15H14FN3O3     | DB01205 | Flumazenil                | -3.168 | -3.169 |
| C15H9FN2O3      | DB05016 | Ataluren                  | -3.167 | -3.167 |
| C22H31N3O5      | DB01340 | Cilazapril                | -2.925 | -3.164 |
| C18H26ClN3O3    | DB06480 | Prucalopride              | -0.453 | -3.164 |
| C19H20N2O3S     | DB01132 | Pioglitazone              | -1.245 | -3.163 |
| C43H53NO14      | DB01248 | Docetaxel                 | -3.16  | -3.162 |
| C19H22FN3O4     | DB01044 | Gatifloxacin              | -3.069 | -3.162 |
| C15H10O2        | DB07776 | Flavone                   | -3.16  | -3.16  |
| C26H27N5O2      | DB06684 | Vilazodone                | -2.058 | -3.153 |
| C19H15NO6       | DB01418 | Acenocoumarol             | -3.129 | -3.15  |

|                 |         |                       |        |        |
|-----------------|---------|-----------------------|--------|--------|
| C19H33NO2       | DB08868 | Fingolimod            | -1.574 | -3.15  |
| C19H25NOS       | DB05271 | Rotigotine            | -3.141 | -3.147 |
| C31H36N2O11     | DB01051 | Novobiocin            | -3.131 | -3.147 |
| C11H12N2O3      | DB02959 | Oxitriptan            | -3.145 | -3.145 |
| C19H22FN3O4     | DB01044 | Gatifloxacin          | -1.996 | -3.142 |
| C8H8C13N3O4S2   | DB01021 | Trichlormethiazide    | -2.892 | -3.141 |
| C17H17N3O6S2    | DB01139 | Cefapirin             | -0.641 | -3.141 |
| C13H15NO2       | DB01437 | Glutethimide          | -3.139 | -3.139 |
| C23H20N2O3S     | DB01138 | Sulfinpyrazone        | -3.137 | -3.139 |
| C31H46O2        | DB01022 | Phylloquinone         | -3.136 | -3.136 |
| C20H21FN6O5     | DB06817 | Raltegravir           | -2.863 | -3.135 |
| C18H19N3O5S     | DB01150 | Cefprozil             | -2.56  | -3.135 |
| C22H30MnN4O14P2 | DB06796 | Mangafodipir          | -0.994 | -3.129 |
| C10H16NO        | DB01010 | Edrophonium           | -3.057 | -3.128 |
| C18H34O2        | DB04224 | Oleic Acid            | -3.12  | -3.123 |
| C13H18Br2N2O    | DB06742 | Ambroxol              | -0.716 | -3.122 |
| C30H26F6N4O2    | DB01419 | Antrafenine           | -1.383 | -3.116 |
| C13H11N3        | DB01123 | Proflavine            | -1.346 | -3.113 |
| C12H12N2O3      | DB01174 | Phenobarbital         | -2.283 | -3.105 |
| C6H6O           | DB03255 | Phenol                | -3.101 | -3.102 |
| C29H26ClFN4O4S  | DB01259 | Lapatinib             | -3.008 | -3.097 |
| C15H10ClN3O3    | DB01068 | Clonazepam            | -3.096 | -3.096 |
| C12H7Cl3O2      | DB08604 | Triclosan             | -2.804 | -3.096 |
| C15H12BrNO3     | DB00963 | Bromfenac             | -3.095 | -3.095 |
| C23H30O6        | DB01380 | Cortisone acetate     | -3.094 | -3.094 |
| C19H22F2N4O3    | DB01208 | Sparfloxacin          | -3.012 | -3.094 |
| C3La2O9         | DB06792 | Lanthanum carbonate   | -2.981 | -3.092 |
| CCaO3           | DB06724 | Calcium Carbonate     | -2.981 | -3.092 |
| CHNaO3          | DB01390 | Sodium bicarbonate    | -2.981 | -3.092 |
| C22H31NO        | DB01036 | Tolterodine           | -3.089 | -3.089 |
| C21H15ClF4N4O3  | DB08896 | Regorafenib           | -3.087 | -3.087 |
| C25H32ClN5O2    | DB01149 | Nefazodone            | -2.683 | -3.087 |
| C24H40O4        | DB01586 | Ursodeoxycholic acid  | -3.079 | -3.083 |
| C30H32Cl3NO     | DB06708 | Lumefantrine          | -3.05  | -3.074 |
| C13H16N2O2      | DB01065 | Melatonin             | -3.073 | -3.073 |
| C28H54N8        | DB06809 | Plerixafor            | -0.599 | -3.064 |
| C13H18ClNO      | DB01156 | Bupropion             | -2.394 | -3.052 |
| C22H26ClN7O2S   | DB01254 | Dasatinib             | -0.954 | -3.051 |
| C10H15NO        | DB01364 | Ephedrine             | -0.389 | -3.051 |
| C17H20ClNO      | DB04837 | Clofedanol            | -3.046 | -3.05  |
| C17H17Cl2N      | DB01104 | Sertraline            | -0.75  | -3.048 |
| C12H19N3O       | DB01168 | Procarbazine          | -2.536 | -3.046 |
| C20H21F3N4O     | DB04908 | Flibanserin           | -0.672 | -3.045 |
| C21H32N2O       | DB06718 | Stanozolol            | -2.607 | -3.042 |
| C15H14N2O4S     | DB05015 | Belinostat            | -0.779 | -3.033 |
| C16H18N2O4S     | DB01053 | Benzympenicillin      | -3.032 | -3.032 |
| C24H40N8O4      | DB00975 | Dipyridamole          | -3.028 | -3.028 |
| C16H12ClNO3     | DB04812 | Benoxaprofen          | -3.027 | -3.027 |
| C21H26N2O3      | DB01392 | Yohimbine             | -1.114 | -3.019 |
| C32H36N4O5      | DB01346 | Quinidine barbiturate | -0.742 | -3.017 |
| C7H8ClN3O4S2    | DB00999 | Hydrochlorothiazide   | -0.764 | -3.015 |
| C14H12O3        | DB04571 | Trioxsalen            | -3.01  | -3.01  |
| C11H13N         | DB01626 | Pargyline             | -2.105 | -3.007 |
| C3La2O9         | DB06792 | Lanthanum carbonate   | -1.962 | -3.006 |
| CCaO3           | DB06724 | Calcium Carbonate     | -1.962 | -3.006 |
| CHNaO3          | DB01390 | Sodium bicarbonate    | -1.962 | -3.006 |
| CH4N2O2         | DB01005 | Hydroxyurea           | -0.507 | -3.005 |
| C19H18ClN3O5S   | DB01147 | Cloxacillin           | -3.002 | -3.002 |
| C4H6N2          | DB01213 | Fomepizole            | -2.999 | -2.999 |
| C32H38N2O8      | DB01089 | Deserpidine           | -2.965 | -2.998 |
| C32H44O7        | DB01410 | Ciclesonide           | -2.997 | -2.997 |
| C3H9NO3         | DB06768 | Ammonium lactate      | -2.997 | -2.997 |
| C18H22O5S       | DB04574 | Estrone sulfate       | -2.996 | -2.996 |

|                 |         |                              |        |        |
|-----------------|---------|------------------------------|--------|--------|
| C10H12O2        | DB06819 | Phenylbutyric acid           | -2.994 | -2.996 |
| C26H29Cl2N5O3   | DB06616 | Bosutinib                    | -0.948 | -2.996 |
| C33H30N4O2      | DB00966 | Telmisartan                  | -2.279 | -2.989 |
| C10H11N3O3S     | DB01015 | Sulfamethoxazole             | -0.453 | -2.988 |
| C12H19N3O       | DB01168 | Procarbazine                 | -2.194 | -2.987 |
| C18H20FN3O4     | DB01165 | Ofloxacin                    | -0.434 | -2.986 |
| C11H12N4O3S     | DB06821 | Sulfameter                   | -2.534 | -2.982 |
| C22H30N2O5S2    | DB01348 | Spirapril                    | -2.066 | -2.982 |
| C29H41F2N5O     | DB04835 | Maraviroc                    | -2.981 | -2.981 |
| C24H35N5O5      | DB04898 | Ximelagatran                 | -2.763 | -2.981 |
| C11H12N4O3S     | DB06821 | Sulfameter                   | -2.604 | -2.979 |
| C27H46O         | DB04540 | Cholesterol                  | -2.978 | -2.978 |
| C5H9N3          | DB05381 | Histamine                    | -2.523 | -2.978 |
| C9H13NO2        | DB01031 | Ethinamate                   | -2.977 | -2.977 |
| C27H37N3O7S     | DB01264 | Darunavir                    | -2.975 | -2.975 |
| C17H27N3O4S     | DB06288 | Amisulpride                  | -2.971 | -2.972 |
| C2H7NO3S        | DB01956 | Taurine                      | -2.971 | -2.972 |
| C14H14N2O       | DB01011 | Metirapone                   | -2.965 | -2.97  |
| C22H25N2O5      | DB01116 | Trimethaphan                 | -2.963 | -2.963 |
| C18H24O3        | DB04573 | Estriol                      | -2.962 | -2.962 |
| C16H18N2        | DB04821 | Nomifensine                  | -1.03  | -2.961 |
| C22H30MnN4O14P2 | DB06796 | Mangafodipir                 | -0.533 | -2.958 |
| C28H35NO3       | DB08867 | Ulipristal                   | -0.763 | -2.957 |
| C20H22N8O6S2    | DB04918 | Ceftobiprole                 | -2.954 | -2.954 |
| C24H32ClFO5     | DB06786 | Halcinonide                  | -2.953 | -2.953 |
| C3H8O2          | DB01839 | Propylene glycol             | -2.953 | -2.953 |
| C28H28N2O2      | DB01501 | Difenoxin                    | -0.785 | -2.953 |
| C21H26N2O3      | DB01392 | Yohimbine                    | -2.927 | -2.952 |
| C3H8O           | DB03175 | Propyl alcohol               | -2.95  | -2.95  |
| C18H20FN3O4     | DB01137 | Levofloxacin                 | -0.394 | -2.946 |
| C16H21Cl2N3O2   | DB06769 | Bendamustine                 | -2.562 | -2.945 |
| C11H12Cl2N2O    | DB04948 | Lofexidine                   | -2.938 | -2.94  |
| C18H15Cl3N2S    | DB06820 | Sulconazole                  | -2.608 | -2.939 |
| C28H29NO4S      | DB06249 | Arzoxifene                   | -0.251 | -2.938 |
| C22H32O3        | DB01420 | Testosterone propionate      | -2.937 | -2.937 |
| C38H69NO13      | DB01211 | Clarithromycin               | -0.301 | -2.936 |
| C19H18N2O4S     | DB08439 | Parecoxib                    | -2.918 | -2.935 |
| C2H3Cl3O2       | DB01563 | Chloral hydrate              | -2.934 | -2.934 |
| C17H21NO        | DB01075 | Diphenhydramine              | -0.695 | -2.932 |
| C12H13NO2       | DB05246 | Methsuximide                 | -2.928 | -2.928 |
| C15H11N3O3      | DB01595 | Nitrazepam                   | -2.928 | -2.928 |
| C26H44O4        | DB05990 | Obeticholic acid             | -2.921 | -2.925 |
| C6H12F2N2O2     | DB06243 | Eflornithine                 | -2.639 | -2.919 |
| C28H44O3        | DB08804 | Nandrolone decanoate         | -2.914 | -2.914 |
| C10H16N2O8      | DB00974 | Edetic Acid                  | -2.9   | -2.914 |
| C11H20N2O2      | DB05541 | Brivaracetam                 | -2.912 | -2.912 |
| C25H36N3O9PS    | DB01319 | Fosamprenavir                | -2.838 | -2.912 |
| C16H18N4O2      | DB04820 | Nialamide                    | -2.906 | -2.906 |
| C13H19ClN2O2    | DB01161 | Chloroprocaine               | -2.883 | -2.904 |
| C19H19N         | DB01619 | Phenindamine                 | -1.107 | -2.901 |
| C21H23Cl2NO6    | DB04920 | Clevidipine                  | -2.9   | -2.9   |
| C13H18O2        | DB01050 | Ibuprofen                    | -2.897 | -2.897 |
| C23H32O4        | DB06780 | Desoxycorticosterone acetate | -2.892 | -2.892 |
| C58H66N10O9     | DB06663 | Pasireotide                  | -2.892 | -2.892 |
| C18H26ClN3O     | DB01611 | Hydroxychloroquine           | -1.187 | -2.89  |
| C4H9NO2         | DB02530 | gamma-Aminobutyric acid      | -2.886 | -2.886 |
| C19H29IO2       | DB01187 | Iophendylate                 | -2.879 | -2.879 |
| C19H25NO2       | DB06152 | Nylidrin                     | -0.311 | -2.879 |
| CH4N2O          | DB03904 | Urea                         | -2.877 | -2.877 |
| C30H32Cl3NO     | DB06708 | Lumefantrine                 | -0.967 | -2.868 |
| C16H20N2        | DB01620 | Pheniramine                  | -2.866 | -2.866 |
| C9H17NO4        | DB08842 | Acetylcarnitine              | -2.861 | -2.861 |
| C19H23N3O2      | DB01253 | Ergometrine                  | -2.233 | -2.859 |

|                |         |                              |        |        |
|----------------|---------|------------------------------|--------|--------|
| C3H4C12F2O     | DB01028 | Methoxyflurane               | -2.858 | -2.858 |
| C5H11NO2S      | DB02893 | D-Methionine                 | -2.856 | -2.856 |
| C12H12N2O2S    | DB04880 | Enoximone                    | -2.853 | -2.853 |
| C15H14N2O4S    | DB05015 | Belinostat                   | -0.314 | -2.846 |
| C20H26N2O2     | DB01426 | Ajmaline                     | -1.306 | -2.843 |
| C16H14F3N3O2S  | DB05351 | Dexlansoprazole              | -0.805 | -2.838 |
| C28H35NO3      | DB08867 | Ulipristal                   | -2.822 | -2.837 |
| C18H23NO3      | DB01551 | Dihydrocodeine               | -2.822 | -2.836 |
| C21H25N3O2S    | DB01224 | Quetiapine                   | -1.655 | -2.836 |
| C10H12CIN3O3S  | DB01325 | Quinethazone                 | -2.83  | -2.832 |
| C34H41N7O5     | DB06695 | Dabigatran etexilate         | -1.359 | -2.83  |
| C22H27NO2      | DB01406 | Danazol                      | -2.829 | -2.829 |
| C29H31F2N3O    | DB04842 | Fluspirilene                 | -2.822 | -2.827 |
| C19H22F2N4O3   | DB01208 | Sparfloxacin                 | -1.617 | -2.827 |
| C23H33N2O      | DB01625 | Isopropamide                 | -2.826 | -2.826 |
| C22H25NO6      | DB01394 | Colchicine                   | -2.824 | -2.824 |
| C10H9N3O       | DB01427 | Amrinone                     | -2.819 | -2.819 |
| C14H12O3S      | DB01600 | Tiaprofenic acid             | -2.819 | -2.819 |
| C26H30NO4S2    | DB08897 | Aclidinium                   | -2.815 | -2.815 |
| C30H26F6N4O2   | DB01419 | Antrafenine                  | -0.841 | -2.812 |
| C17H20BrNO     | DB01237 | Bromodiphenhydramine         | -0.585 | -2.81  |
| C20H21FN2O     | DB01175 | Escitalopram                 | -2.807 | -2.809 |
| C22H25CIN2OS   | DB01624 | Zuclopthixol                 | -1.309 | -2.809 |
| C30H26F6N4O2   | DB01419 | Antrafenine                  | -2.211 | -2.808 |
| C18H26CIN3O    | DB01611 | Hydroxychloroquine           | -2.753 | -2.803 |
| C18H20FN3O4    | DB01137 | Levofloxacin                 | -1.26  | -2.802 |
| C24H31NO4      | DB06751 | Drotaverine                  | -2.8   | -2.8   |
| C25H28N8O2     | DB08882 | Linagliptin                  | -2.798 | -2.799 |
| C16H26N2O5S    | DB01597 | Cilastatin                   | -2.792 | -2.799 |
| C34H41N7O5     | DB06695 | Dabigatran etexilate         | -0.439 | -2.799 |
| C18H25N3O2     | DB06335 | Saxagliptin                  | -2.685 | -2.797 |
| C14H21N3O3     | DB01096 | Oxamniquine                  | -2.793 | -2.793 |
| C16H21NO2      | DB00980 | Ramelteon                    | -2.787 | -2.787 |
| C20H21NO4      | DB01113 | Papaverine                   | -1.631 | -2.785 |
| C24H31NO       | DB05812 | Abiraterone                  | -2.763 | -2.784 |
| C21H23N3OS     | DB01608 | Periciazine                  | -2.779 | -2.78  |
| C26H28Cl2N4O4  | DB01026 | Ketoconazole                 | -0.081 | -2.779 |
| C16H18N2       | DB04821 | Nomifensine                  | -2.752 | -2.775 |
| C14H12F3N3O5   | DB05154 | Pretomanid                   | -2.774 | -2.774 |
| C6H12F2N2O2    | DB06243 | Eflornithine                 | -2.192 | -2.771 |
| C10H9AgN4O2S   | DB05245 | Silver sulfadiazine          | -2.612 | -2.767 |
| C24H25ClFN5O3  | DB08916 | Afatinib                     | -1.857 | -2.76  |
| C2H2Cl2O2      | DB08809 | Dichloroacetic acid          | -2.757 | -2.757 |
| C18H29NO2      | DB01359 | Penbutolol                   | -2.754 | -2.755 |
| C19H14Cl2N2O3S | DB08828 | Vismodegib                   | -2.754 | -2.754 |
| C24H26ClFN4O   | DB06144 | Sertindole                   | -2.739 | -2.744 |
| C20H20FNO3S    | DB06209 | Prasugrel                    | -2.518 | -2.744 |
| C16H12O3       | DB01125 | Anisindione                  | -0.401 | -2.743 |
| C28H24FN3O5    | DB08875 | Cabozantinib                 | -1.192 | -2.742 |
| C15H21N3O      | DB01087 | Primaquine                   | -2.741 | -2.741 |
| C14H20N2O3     | DB02546 | Vorinostat                   | -2.74  | -2.74  |
| C21H25CIN2O3   | DB06282 | Levocetirizine               | -2.27  | -2.734 |
| C27H40O4       | DB06789 | Hydroxyprogesterone caproate | -2.728 | -2.728 |
| C10H21N        | DB06714 | Propylhexedrine              | -2.728 | -2.728 |
| C19H19N        | DB01619 | Phenindamine                 | -2.24  | -2.724 |
| C37H48N4O5     | DB01601 | Lopinavir                    | -2.723 | -2.723 |
| C18H15CIN2O6S2 | DB06268 | Sitaxentan                   | -2.716 | -2.716 |
| C20H21F3N4O    | DB04908 | Flibanserin                  | -2.703 | -2.714 |
| C32H40BrN5O5   | DB01200 | Bromocriptine                | -2.534 | -2.713 |
| C16H12FN3O3    | DB01544 | Flunitrazepam                | -2.71  | -2.71  |
| C13H12N2O5S    | DB04743 | Nimesulide                   | -2.51  | -2.71  |
| C14H12O3       | DB01428 | Oxybenzone                   | -1.027 | -2.708 |
| C6H12N4        | DB06799 | Methenamine                  | -0.444 | -2.707 |

|                  |         |                       |        |        |
|------------------|---------|-----------------------|--------|--------|
| C11H16N2O2       | DB01085 | Pilocarpine           | -1.947 | -2.703 |
| C4H3F7O          | DB01236 | Sevoflurane           | -2.701 | -2.701 |
| C11H12ClNO3S     | DB01178 | Chlormezanone         | -2.7   | -2.7   |
| C11H16N2O2       | DB01085 | Pilocarpine           | -2.503 | -2.697 |
| C17H17ClN6O3     | DB01198 | Zopiclone             | -2.218 | -2.696 |
| C19H18ClN3O5S    | DB06228 | Rivaroxaban           | -2.694 | -2.694 |
| C30H24N4O8       | DB08822 | Azilsartan medoxomil  | -2.69  | -2.69  |
| C23H27FN4O3      | DB01267 | Paliperidone          | -2.68  | -2.69  |
| C16H27NO6        | DB08872 | Gabapentin enacarbil  | -2.684 | -2.687 |
| C22H27FN4O2      | DB01268 | Sunitinib             | -2.682 | -2.686 |
| C19H20N2O3       | DB03585 | Oxyphenbutazone       | -0.13  | -2.684 |
| C14H23NO         | DB06204 | Tapentadol            | -2.683 | -2.683 |
| C33H30N4O2       | DB00966 | Telmisartan           | -0.526 | -2.683 |
| CuO4S            | DB06778 | Cupric sulfate        | -2.681 | -2.681 |
| C9H10N2O2        | DB01121 | Phenacemide           | -2.675 | -2.675 |
| C26H29Cl2N5O3    | DB06616 | Bosutinib             | -2.561 | -2.674 |
| C27H33N3O8       | DB01301 | Rolitetraacycline     | -0.25  | -2.672 |
| C13H13N5O5S2     | DB01332 | Ceftizoxime           | -2.671 | -2.671 |
| C8H8N4           | DB01275 | Hydralazine           | -2.34  | -2.665 |
| C13H21N3O        | DB01035 | Procainamide          | -2.659 | -2.663 |
| C18H26ClN3O3     | DB06480 | Prucalopride          | -2.652 | -2.658 |
| C23H29N3O2S      | DB01063 | Acetophenazine        | -2.321 | -2.657 |
| C17H19F2N3O3     | DB00978 | Lomefloxacin          | -1.293 | -2.648 |
| C43H65N5O10      | DB00976 | Telithromycin         | -2.367 | -2.645 |
| C12H14N4O4S      | DB06150 | Sulfadimethoxine      | -0.759 | -2.644 |
| C19H28O2         | DB01708 | Prasterone            | -2.642 | -2.642 |
| C9H11NO2         | DB01086 | Benzocaine            | -2.641 | -2.641 |
| C19H27NO3        | DB04844 | Tetrabenazine         | -2.591 | -2.641 |
| C28H22F3N7O      | DB04868 | Nilotinib             | -1.717 | -2.641 |
| C40H59NO11       | DB08871 | Eribulin              | -2.631 | -2.639 |
| C16H19N3O4S      | DB01333 | Cefradine             | -2.054 | -2.639 |
| C24H23ClO2       | DB04938 | Ospemifene            | -2.638 | -2.638 |
| C9H17NO2         | DB00996 | Gabapentin            | -2.637 | -2.637 |
| C9H10Cl2N4       | DB00964 | Apraclonidine         | -2.632 | -2.636 |
| C25H32ClFO5      | DB01013 | Clobetasol propionate | -2.633 | -2.633 |
| C32H36N4O5       | DB01346 | Quinidine barbiturate | -2.618 | -2.632 |
| C16H13Cl3N2OS    | DB01007 | Tioconazole           | -2.017 | -2.632 |
| C18H20N2O6       | DB01054 | Nitrendipine          | -2.63  | -2.63  |
| C35H35F2N8O5S    | DB06636 | Isavuconazonium       | -2.197 | -2.629 |
| C27H40O3         | DB02300 | Calcipotriol          | -2.628 | -2.628 |
| C20H18NO4        | DB04115 | Berberine             | -2.625 | -2.625 |
| C9H5Cl2NO        | DB01243 | Chloroxine            | -2.489 | -2.623 |
| C19H21N3O        | DB06766 | Alcaftadine           | -2.613 | -2.621 |
| C36H53N7O6       | DB05521 | Telaprevir            | -2.62  | -2.62  |
| C13H19N5         | DB06762 | Pinacidil             | -2.615 | -2.62  |
| C17H18N4O        | DB00969 | Alosetron             | -1.717 | -2.62  |
| C10H12N4O5S      | DB01606 | Tazobactam            | -2.618 | -2.618 |
| C13H12N2O5S      | DB04743 | Nimesulide            | -1.872 | -2.615 |
| C19H21N3O        | DB06766 | Alcaftadine           | -0.095 | -2.614 |
| C33H30N4O2       | DB00966 | Telmisartan           | -0.741 | -2.613 |
| C11H13ClF3N3O4S3 | DB01324 | Polythiazide          | -2.607 | -2.61  |
| C22H23NO7        | DB06174 | Noscapine             | -1.777 | -2.61  |
| C16H25NO2        | DB06700 | Desvenlafaxine        | -2.608 | -2.608 |
| C17H24O3         | DB04838 | Cyclandelate          | -2.606 | -2.606 |
| C27H34F2O7       | DB06781 | Difluprednate         | -2.605 | -2.605 |
| C21H16F4N4O2S    | DB08899 | Enzalutamide          | -2.6   | -2.6   |
| C13H17N3O        | DB01424 | Aminophenazone        | -2.535 | -2.597 |
| C21H27N5O4S      | DB01067 | Glipizide             | -0.627 | -2.596 |
| C23H36N2O2       | DB01216 | Finasteride           | -2.593 | -2.593 |
| C13H17N3O        | DB01424 | Aminophenazone        | -1.221 | -2.588 |
| C17H19NO4        | DB01192 | Oxymorphone           | -1.503 | -2.586 |
| C13H16ClNO       | DB01221 | Ketamine              | -1.504 | -2.585 |
| C13H8Cl2N2O4     | DB06803 | Niclosamide           | -1.256 | -2.584 |

|               |         |                       |        |        |
|---------------|---------|-----------------------|--------|--------|
| C3H8OS2       | DB06782 | Dimercaprol           | -2.572 | -2.578 |
| C28H29F2N3O   | DB01100 | Pimozide              | 0.067  | -2.578 |
| C14H18N6O     | DB01048 | Abacavir              | -2.571 | -2.576 |
| C13H17N3O4S   | DB04817 | Metamizole            | -2.571 | -2.573 |
| C13H17CIN2O2  | DB01171 | Moclobemide           | -2.383 | -2.572 |
| C20H33NO3     | DB04822 | Oxeladin              | 0.072  | -2.572 |
| C14H10N4O5    | DB01219 | Dantrolene            | -2.498 | -2.57  |
| C30H26F6N4O2  | DB01419 | Antrafenine           | -2.206 | -2.565 |
| C21H23NO5     | DB01452 | Diamorphine           | -1.214 | -2.565 |
| C20H24O2      | DB00990 | Exemestane            | -2.564 | -2.564 |
| C28H22F3N7O   | DB04868 | Nilotinib             | -2.42  | -2.56  |
| C38H52N6O7    | DB01072 | Atazanavir            | 0.02   | -2.557 |
| C18H21N3O3S   | DB01129 | Rabeprazole           | -2.52  | -2.555 |
| C28H44O2      | DB06410 | Doxercalciferol       | -2.551 | -2.551 |
| C15H21N3O3S   | DB01120 | Gliclazide            | -0.622 | -2.545 |
| C18H23NO      | DB01173 | Orphenadrine          | -0.304 | -2.541 |
| C20H20FNO3S   | DB06209 | Prasugrel             | -1.859 | -2.539 |
| C22H25CIN2OS  | DB01624 | Zuclopenthixol        | -1.691 | -2.538 |
| C26H26F2N2    | DB04841 | Flunarizine           | -1.316 | -2.537 |
| C19H26O3      | DB08905 | Formestane            | -2.534 | -2.534 |
| C12H14N4O3S   | DB01298 | Sulfacytine           | -0.878 | -2.533 |
| C19H27NO3     | DB04844 | Tetrabenazine         | -1.034 | -2.529 |
| C21H25NO3     | DB06230 | Nalmefene             | 0.033  | -2.523 |
| C16H11CIN4    | DB01215 | Estazolam             | -2.521 | -2.522 |
| C12H6Cl4O2S   | DB04813 | Bithionol             | -2.133 | -2.522 |
| C24H40O5      | DB02659 | Cholic Acid           | -2.516 | -2.52  |
| C16H18FN3O2   | DB04953 | Ezogabine             | -2.511 | -2.52  |
| C24H40O4      | DB06777 | Chenodeoxycholic acid | -2.515 | -2.519 |
| C5H11NO2      | DB06756 | Glycine betaine       | -2.516 | -2.516 |
| C4H11NO3      | DB03754 | Tromethamine          | -2.276 | -2.516 |
| C23H15N3O     | DB08883 | Perampanel            | -2.508 | -2.508 |
| C22H38O5      | DB06826 | Unoprostone           | -2.501 | -2.504 |
| C15H22N2O     | DB00961 | Mepivacaine           | -1.37  | -2.501 |
| C30H34N2O3    | DB06401 | Bazedoxifene          | -2.489 | -2.499 |
| C16H24N2O2    | DB01618 | Molindone             | -2.442 | -2.495 |
| C19H19N       | DB01619 | Phenindamine          | -2.039 | -2.495 |
| C23H27N       | DB01091 | Butenafine            | -1.545 | -2.494 |
| C20H24N2      | DB08801 | Dimetindene           | -0.59  | -2.494 |
| C22H24CIN5O2  | DB01184 | Domperidone           | -0.389 | -2.494 |
| C19H20N2O3    | DB03585 | Oxyphenbutazone       | -2.482 | -2.49  |
| C15H18Cl6N2O5 | DB01495 | Dichloralphenazone    | -2.489 | -2.489 |
| C19H24N2OS    | DB01403 | Methotrimeprazine     | -2.488 | -2.489 |
| C16H12O3      | DB01125 | Anisidione            | -2.476 | -2.487 |
| C23H29N3O2S2  | DB01623 | Thiothixene           | -1.223 | -2.481 |
| C12H14N4O2S   | DB01582 | Sulfamethazine        | -2.168 | -2.48  |
| C13H19CIN2O2  | DB01161 | Chloroprocaine        | -0.492 | -2.479 |
| C24H31NO      | DB05812 | Abiraterone           | -0.48  | -2.479 |
| C26H26F2N2    | DB04841 | Flunarizine           | 0.182  | -2.478 |
| C17H26N4O     | DB01084 | Emedastine            | -1.898 | -2.469 |
| C12H14N4O2S   | DB01582 | Sulfamethazine        | -0.62  | -2.458 |
| C25H28N6O     | DB01029 | Irbesartan            | -2.451 | -2.457 |
| C12H13NO2S    | DB04657 | Carboxin              | -2.455 | -2.455 |
| C26H29Cl2N5O3 | DB06616 | Bosutinib             | -1.301 | -2.455 |
| C17H22N2S     | DB04826 | Thenalidine           | -2.447 | -2.447 |
| C18H23NO      | DB01173 | Orphenadrine          | -2.432 | -2.446 |
| C12H11NO      | DB04951 | Pirfenidone           | -2.439 | -2.439 |
| C9H5ClINO     | DB04815 | Clioquinol            | -2.257 | -2.438 |
| C11H12N2O     | DB01435 | Antipyrine            | -2.433 | -2.433 |
| C13H13N3      | DB01273 | Varenicline           | -2.433 | -2.433 |
| C12H9F3N2O2   | DB01097 | Leflunomide           | -2.428 | -2.428 |
| C16H26O5      | DB06697 | Artemether            | -2.424 | -2.424 |
| C17H25N3O2    | DB04876 | Vildagliptin          | -0.879 | -2.424 |
| C34H41N7O5    | DB06695 | Dabigatran etexilate  | -0.884 | -2.421 |



|               |         |                           |        |        |
|---------------|---------|---------------------------|--------|--------|
| C15H14N4O2S   | DB06729 | Sulfaphenazole            | -0.958 | -2.417 |
| C18H23FINO2   | DB08824 | Ioflupane I-123           | -2.396 | -2.409 |
| C16H19CIN2    | DB01114 | Chlorphenamine            | -2.404 | -2.404 |
| C33H60O10     | DB06804 | Nonoxynol-9               | -2.403 | -2.403 |
| C24H25NO4     | DB01148 | Flavoxate                 | -2.391 | -2.401 |
| C19H26N2S     | DB01186 | Pergolide                 | -2.39  | -2.401 |
| C6H14O6S2     | DB01008 | Busulfan                  | -2.4   | -2.4   |
| C18H15CIN2O2S | DB01628 | Etoricoxib                | -2.4   | -2.4   |
| C35H42N2O9    | DB01180 | Rescinnamine              | -0.645 | -2.398 |
| C11H16CIN5    | DB01131 | Proguanil                 | -2.167 | -2.389 |
| C22H22F3N     | DB01012 | Cinacalcet                | -0.016 | -2.384 |
| C18H21N5O2    | DB06203 | Alogliptin                | -2.381 | -2.381 |
| C13H17CIN2O2  | DB01171 | Moclobemide               | -1.608 | -2.378 |
| C28H44O       | DB04038 | Ergosterol                | -2.375 | -2.375 |
| C25H36N3O9PS  | DB01319 | Fosamprenavir             | -1.104 | -2.372 |
| C21H29NO2     | DB06713 | Norelgestromin            | -2.371 | -2.371 |
| C11H12N4O2S   | DB01581 | Sulfamerazine             | 0.006  | -2.37  |
| C28H31NO2     | DB06202 | Lasofoxifene              | -2.357 | -2.362 |
| C20H31NO4     | DB06217 | Vernakalant               | -2.349 | -2.355 |
| C12H14N4O4S   | DB06150 | Sulfadimethoxine          | -2.218 | -2.354 |
| C11H16CIN5    | DB01131 | Proguanil                 | -1.27  | -2.349 |
| C3H2F6O       | DB01189 | Desflurane                | -2.348 | -2.348 |
| C2H6OS        | DB01093 | Dimethyl sulfoxide        | -2.344 | -2.344 |
| C19H35N       | DB01074 | Perhexiline               | -2.341 | -2.341 |
| C22H24CIN3O   | DB00972 | Azelastine                | -2.339 | -2.34  |
| C14H14N2      | DB06711 | Naphazoline               | -2.338 | -2.338 |
| C20H15BrN6O   | DB06414 | Etravirine                | -2.333 | -2.333 |
| C11H13N       | DB01626 | Pargyline                 | -2.182 | -2.328 |
| C16H24N2      | DB06694 | Xylometazoline            | -2.321 | -2.321 |
| C21H32Cl2N4O  | DB06016 | Cariprazine               | -2.27  | -2.321 |
| C22H19ClO3    | DB01117 | Atovaquone                | -2.318 | -2.318 |
| C21H32O3      | DB06412 | Oxymetholone              | -0.059 | -2.312 |
| C26H30Cl2F3NO | DB01218 | Halofantrine              | -2.31  | -2.311 |
| C13H8Cl2N2O4  | DB06803 | Niclosamide               | -2.242 | -2.308 |
| C26H28Cl2N4O4 | DB01026 | Ketoconazole              | -1.978 | -2.303 |
| C34H41N7O5    | DB06695 | Dabigatran etexilate      | -0.743 | -2.302 |
| C19H23NO      | DB01146 | Diphenylpyraline          | -2.296 | -2.3   |
| C24H28CIN5O3  | DB00985 | Dimenhydrinate            | -2.286 | -2.299 |
| C17H21NO      | DB01075 | Diphenhydramine           | -2.284 | -2.298 |
| C28H42Cl2N4O2 | DB01122 | Ambenonium                | -2.295 | -2.295 |
| C17H19NO4     | DB01192 | Oxymorphone               | -0.019 | -2.293 |
| C27H30F6N2O2  | DB01126 | Dutasteride               | -2.289 | -2.289 |
| C21H23NO5     | DB01452 | Diamorphine               | -2.222 | -2.286 |
| C23H31Cl2NO3  | DB01196 | Estramustine              | -2.28  | -2.28  |
| C28H46O       | DB01070 | Dihydrotachysterol        | -2.28  | -2.28  |
| C14H19NO2     | DB06701 | Dexmethylphenidate        | -2.276 | -2.277 |
| C10H11N3O3S   | DB01015 | Sulfamethoxazole          | -2.267 | -2.275 |
| C29H39NO9     | DB04865 | Omacetaxine mepesuccinate | -2.16  | -2.273 |
| C26H29F2N7    | DB01430 | Almitrine                 | -0.608 | -2.267 |
| C26H28Cl2N4O4 | DB01026 | Ketoconazole              | 0.208  | -2.266 |
| C15H14N2O4S   | DB05015 | Belinostat                | -2.241 | -2.263 |
| C29H27F3N6O   | DB08901 | Ponatinib                 | -1.509 | -2.263 |
| C23H26N2O2    | DB01591 | Solifenacin               | -2.259 | -2.262 |
| C20H28O2      | DB00982 | Isotretinoin              | -2.258 | -2.261 |
| C12H17NO2     | DB01188 | Ciclopirox                | -2.259 | -2.259 |
| C18H20N2      | DB06148 | Mianserin                 | -1.371 | -2.257 |
| C7H6O2        | DB03793 | Benzoic Acid              | -2.255 | -2.256 |
| C11H21NO3     | DB06261 | Hexaminolevulinate        | -1.875 | -2.252 |
| C5H5NOS       | DB06815 | Pyrithione                | -2.247 | -2.247 |
| C18H15Cl3N2S  | DB06820 | Sulconazole               | -1.744 | -2.247 |
| C9H16CIN3O2   | DB01206 | Lomustine                 | -2.246 | -2.246 |
| C23H27Cl2N3O2 | DB01238 | Aripiprazole              | -1.488 | -2.246 |
| C17H17Cl2N    | DB01104 | Sertraline                | -2.233 | -2.245 |

|                |         |                      |        |        |
|----------------|---------|----------------------|--------|--------|
| C18H25N3O2     | DB06335 | Saxagliptin          | -1.202 | -2.243 |
| C6H18N4        | DB06824 | Triethylenetetramine | -0.748 | -2.238 |
| C20H33N2O      | DB06787 | Hexocyclium          | -0.734 | -2.238 |
| C22H18N2       | DB04794 | Bifonazole           | -1.733 | -2.23  |
| C6H6Cl2N2O4S2  | DB01144 | Diclofenamide        | 0.379  | -2.23  |
| C15H17NO2      | DB06594 | Agomelatine          | -2.227 | -2.227 |
| C27H45N5O5     | DB08873 | Boceprevir           | -2.227 | -2.227 |
| C19H15NO6      | DB01418 | Acenocoumarol        | -0.219 | -2.218 |
| C10H9AgN4O2S   | DB05245 | Silver sulfadiazine  | -1.348 | -2.217 |
| C19H18N2O4S    | DB08439 | Parecoxib            | -0.103 | -2.216 |
| C23H20F3N5O2S2 | DB08912 | Dabrafenib           | -1.795 | -2.211 |
| C13H17N        | DB01037 | Selegiline           | -2.105 | -2.206 |
| C19H21NO       | DB01142 | Doxepin              | -2.194 | -2.197 |
| C17H18N2O6     | DB01115 | Nifedipine           | -2.195 | -2.195 |
| C17H15N5O      | DB00962 | Zaleplon             | -2.195 | -2.195 |
| C24H40O4       | DB03619 | Deoxycholic Acid     | -2.189 | -2.193 |
| C11H21NO3      | DB06261 | Hexaminolevulinate   | -1.747 | -2.193 |
| C15H23N3O4S    | DB01000 | Cyclacillin          | -0.964 | -2.191 |
| C2H4O2         | DB03166 | Acetic acid          | -2.186 | -2.189 |
| C24H25ClFN5O3  | DB08916 | Afatinib             | -2.006 | -2.188 |
| C17H20F6N2O3   | DB01195 | Flecainide           | -2.186 | -2.186 |
| C38H47N5O7S2   | DB06290 | Simeprevir           | 0.485  | -2.186 |
| C20H24N2       | DB08801 | Dimetindene          | 0.355  | -2.183 |
| C34H41N7O5     | DB06695 | Dabigatran etexilate | -1.531 | -2.178 |
| C24H33N3O3S2   | DB01621 | Pipotiazine          | -2.176 | -2.176 |
| AlH3O3         | DB06723 | Aluminum hydroxide   | -2.175 | -2.175 |
| C24H28ClN5O3   | DB00985 | Dimenhydrinate       | 0.063  | -2.175 |
| C19H25N5O4     | DB01162 | Terazosin            | -2.051 | -2.173 |
| C7H8ClN3O4S2   | DB00999 | Hydrochlorothiazide  | -2.156 | -2.17  |
| C14H10BrN3O    | DB01558 | Bromazepam           | -2.169 | -2.169 |
| C13H10ClN3O4S2 | DB06725 | Lornoxicam           | -2.168 | -2.169 |
| C19H21NS       | DB06153 | Pizotifen            | 0.406  | -2.169 |
| C25H34F2O5     | DB08819 | Tafluprost           | -2.167 | -2.167 |
| C22H21Cl3N4O   | DB06155 | Rimonabant           | -2.162 | -2.162 |
| C20H15Cl3N2OS  | DB01153 | Sertaconazole        | -1.9   | -2.16  |
| C25H29I2NO3    | DB01118 | Amiodarone           | -0.147 | -2.16  |
| C18H22N2       | DB01151 | Desipramine          | -2.159 | -2.159 |
| C25H32O2       | DB04575 | Quinestrol           | -2.156 | -2.156 |
| C10H20N2O4     | DB06797 | Mebutamate           | -2.156 | -2.156 |
| C23H29N3O2S2   | DB01623 | Thiothixene          | -2.047 | -2.146 |
| C23H28ClN3O5S  | DB01016 | Glyburide            | -2.123 | -2.144 |
| C18H22N2       | DB01176 | Cyclizine            | -1.749 | -2.144 |
| C20H15Cl3N2OS  | DB01153 | Sertaconazole        | -1.529 | -2.143 |
| C26H29F2N7     | DB01430 | Almitrine            | -2.098 | -2.141 |
| C15H23N3O4S    | DB01000 | Cyclacillin          | -2.06  | -2.14  |
| C15H22N2O      | DB00961 | Mepivacaine          | -2.043 | -2.138 |
| C53H67N9O10S   | DB01369 | Quinupristin         | -1.735 | -2.131 |
| C18H15Cl3N2O   | DB01127 | Econazole            | -1.408 | -2.131 |
| C12H21N5O3     | DB01303 | Oxtriphylline        | -2.128 | -2.128 |
| C11H17BrN      | DB01158 | Bretylium            | -2.125 | -2.125 |
| C25H29I2NO3    | DB01118 | Amiodarone           | -2.103 | -2.123 |
| C30H47NO4S     | DB01256 | Retapamulin          | -2.117 | -2.118 |
| C18H28N2O      | DB01002 | Levobupivacaine      | -0.67  | -2.111 |
| C31H48O2S2     | DB01599 | Probucol             | -2.107 | -2.107 |
| C24H25NO4      | DB01148 | Flavoxate            | 0.327  | -2.102 |
| C21H26O2       | DB01357 | Mestranol            | -2.083 | -2.083 |
| C33H30N4O2     | DB00966 | Telmisartan          | -1.806 | -2.08  |
| C25H32ClN5O2   | DB01149 | Nefazodone           | -1.659 | -2.077 |
| C18H22N2       | DB01176 | Cyclizine            | -0.046 | -2.077 |
| C28H54N8       | DB06809 | Plerixafor           | 0.114  | -2.077 |
| C43H74N2O14    | DB06145 | Spiramycin           | -0.445 | -2.07  |
| C13H16N2       | DB06764 | Tetryzoline          | -2.069 | -2.069 |
| C17H11ClF4N2S  | DB01589 | Quazepam             | -2.065 | -2.065 |

|               |         |                                 |        |        |
|---------------|---------|---------------------------------|--------|--------|
| C21H32O3      | DB06412 | Oxymetholone                    | -1.858 | -2.065 |
| C18H14Cl4N2O  | DB01110 | Miconazole                      | -1.339 | -2.062 |
| C21H32O2      | DB02789 | Pregnenolone                    | -2.061 | -2.061 |
| C26H32F2O7    | DB01047 | Fluocinonide                    | -2.061 | -2.061 |
| C8H7ClN2O2S   | DB01119 | Diazoxide                       | 0.51   | -2.059 |
| C19H23ClN2    | DB01242 | Clomipramine                    | -2.058 | -2.058 |
| C12H9F3N2O2   | DB08880 | Teriflunomide                   | -2.052 | -2.058 |
| C9H19N        | DB06706 | Isometheptene                   | -2.055 | -2.055 |
| C6H11NO2      | DB01080 | Vigabatrin                      | -2.051 | -2.051 |
| C28H28N2O2    | DB01501 | Difenoxin                       | -2.032 | -2.048 |
| C58H80N2O14   | DB01226 | Mivacurium                      | -2.041 | -2.041 |
| C12H21N3O5S3  | DB01194 | Brinzolamide                    | -1.993 | -2.039 |
| C21H20ClNO5   | DB06216 | Asenapine                       | -2.034 | -2.038 |
| C14H22ClN3O2  | DB01233 | Metoclopramide                  | -2.028 | -2.032 |
| C20H21ClO4    | DB01039 | Fenofibrate                     | -2.03  | -2.03  |
| C11H12N4O2S   | DB01581 | Sulfamerazine                   | -1.803 | -2.025 |
| C26H29MgNO10  | DB01401 | Choline magnesium trisalicylate | -2.024 | -2.024 |
| C20H33N2O     | DB06787 | Hexocyclium                     | -1.971 | -2.02  |
| C12H13N       | DB01367 | Rasagiline                      | -1.601 | -2.018 |
| C34H41N7O5    | DB06695 | Dabigatran etexilate            | 0.128  | -2.016 |
| C15H22N2O     | DB04896 | Milnacipran                     | -2.013 | -2.014 |
| C19H17ClN2O   | DB01588 | Prazepam                        | -2.01  | -2.01  |
| C17H20N2O6S   | DB01603 | Meticillin                      | -2.009 | -2.009 |
| C12H19N3O     | DB01168 | Procabazine                     | -1.325 | -2.009 |
| C19H19N       | DB01619 | Phenindamine                    | -0.176 | -1.997 |
| C2HBrClF3     | DB01159 | Halothane                       | -1.994 | -1.994 |
| C18H20N2      | DB06148 | Mianserin                       | -1.84  | -1.991 |
| C24H30O3      | DB01395 | Drospirenone                    | -1.99  | -1.99  |
| C14H14N8O4S3  | DB01327 | Cefazolin                       | -1.982 | -1.982 |
| C3H6O2        | DB03766 | Propanoic acid                  | -1.975 | -1.978 |
| C18H28N2O     | DB01002 | Levobupivacaine                 | -1.902 | -1.956 |
| C23H27N3O7    | DB01017 | Minocycline                     | 0.682  | -1.948 |
| C18H15Cl3N2O  | DB01127 | Econazole                       | -1.737 | -1.945 |
| C30H62O10     | DB06811 | Polidocanol                     | -1.941 | -1.941 |
| C38H47N5O7S2  | DB06290 | Simeprevir                      | -1.929 | -1.936 |
| C11H17N       | DB01365 | Mephentermine                   | -1.929 | -1.929 |
| C30H32N2O2    | DB01081 | Diphenoxylate                   | -1.491 | -1.929 |
| C11H18N2O3    | DB01351 | Amobarbital                     | -1.891 | -1.925 |
| CH2O          | DB03843 | Formaldehyde                    | -1.919 | -1.919 |
| C23H27Cl2N3O2 | DB01238 | Aripiprazole                    | -1.725 | -1.918 |
| C17H26ClN     | DB01105 | Sibutramine                     | -1.913 | -1.915 |
| C24H29ClO4    | DB04839 | Cyproterone acetate             | -1.897 | -1.897 |
| C6H6Cl2N2O4S2 | DB01144 | Diclofenamide                   | -1.89  | -1.897 |
| C27H33N3O6S   | DB01251 | Gliquidone                      | 0.215  | -1.89  |
| C12H14N4O4S   | DB01299 | Sulfadoxine                     | -1.735 | -1.887 |
| C35H38Cl2N8O4 | DB01167 | Itraconazole                    | 0.099  | -1.873 |
| C18H22N2      | DB01176 | Cyclizine                       | -1.401 | -1.87  |
| C25H28N6O     | DB01029 | Irbesartan                      | 0.844  | -1.864 |
| C18H22N2S     | DB01246 | Alimemazine                     | -1.862 | -1.863 |
| C22H18N2      | DB04794 | Bifonazole                      | -1.528 | -1.863 |
| C6H8O4        | DB08908 | Dimethyl fumarate               | -1.858 | -1.858 |
| C12H16F3N     | DB01191 | Dexfenfluramine                 | -1.853 | -1.854 |
| C30H40N4      | DB04209 | Dequalinium                     | -1.851 | -1.851 |
| C21H27N5O4S   | DB01067 | Glipizide                       | -1.812 | -1.834 |
| C13H16ClNO    | DB01221 | Ketamine                        | -1.718 | -1.822 |
| C29H27F3N6O   | DB08901 | Ponatinib                       | 0.682  | -1.822 |
| C5H8N4O12     | DB06154 | Pentaerythritol tetranitrate    | -1.815 | -1.815 |
| C10H15N       | DB01577 | Metamfetamine                   | -1.812 | -1.812 |
| C15H32N2      | DB01090 | Pentolinium                     | -1.796 | -1.796 |
| C14H22N2O3    | DB01297 | Practolol                       | -1.789 | -1.791 |
| C23H31NO3     | DB00957 | Norgestimate                    | -1.79  | -1.79  |
| C16H13Cl3N2OS | DB01007 | Tioconazole                     | -1.527 | -1.786 |
| C4H6N4O12     | DB01613 | Erythryl tetranitrate           | -1.775 | -1.775 |

|               |         |                           |        |        |
|---------------|---------|---------------------------|--------|--------|
| C19H24N2O2    | DB01058 | Praziquantel              | -1.775 | -1.775 |
| C7H17N2O2     | DB01019 | Bethanechol               | -1.772 | -1.772 |
| C33H38O6      | DB08909 | Glycerol phenylbutyrate   | -1.767 | -1.767 |
| C17H19N3      | DB08799 | Antazoline                | -1.764 | -1.764 |
| C15H23NO3     | DB01580 | Oxprenolol                | -1.761 | -1.762 |
| C21H27N3O7S   | DB01602 | Bacampicillin             | -1.556 | -1.762 |
| C6H12N4       | DB06799 | Methenamine               | -1.748 | -1.761 |
| C12H17NO      | DB01579 | Phendimetrazine           | -1.545 | -1.76  |
| C35H30N4O4    | DB06595 | Midostaurin               | -1.748 | -1.748 |
| C9H9N3O2S2    | DB06147 | Sulfathiazole             | -1.519 | -1.745 |
| C17H23N3O     | DB06691 | Mepyramine                | -1.738 | -1.743 |
| C21H25CIN2O3  | DB06282 | Levocetirizine            | -1.33  | -1.741 |
| C26H25CIN2O3  | DB06212 | Tolvaptan                 | -1.728 | -1.728 |
| C8H18NO2      | DB06709 | Methacholine              | -1.719 | -1.719 |
| C20H27NO3     | DB01108 | Trilostane                | -1.719 | -1.719 |
| C47H64N4O12   | DB01201 | Rifapentine               | 0.873  | -1.716 |
| C12H14N4O3S   | DB01298 | Sulfacytine               | -1.67  | -1.708 |
| C23H29N3O2S   | DB01063 | Acetophenazine            | -1.16  | -1.708 |
| C22H28N2O2    | DB01228 | Encainide                 | -1.7   | -1.701 |
| C18H19Cl2NO4  | DB01023 | Felodipine                | -1.691 | -1.691 |
| C21H33N3O5S   | DB01605 | Pivmecillinam             | -1.69  | -1.69  |
| C62H86N12O16  | DB00970 | Dactinomycin              | -1.684 | -1.684 |
| C19H23N5O3    | DB01157 | Trimetrexate              | -1.649 | -1.682 |
| C14H22N2O2    | DB00989 | Rivastigmine              | -0.178 | -1.678 |
| C27H33N3O6S   | DB01251 | Gliquidone                | -1.63  | -1.647 |
| C12H17NO      | DB01579 | Phendimetrazine           | -0.94  | -1.646 |
| C7H16NO2      | DB03128 | Acetylcholine             | -1.624 | -1.624 |
| C27H34O3      | DB00984 | Nandrolone phenpropionate | -1.616 | -1.616 |
| C20H27N5O2    | DB01166 | Cilostazol                | -1.603 | -1.603 |
| C22H31NO3     | DB01062 | Oxybutynin                | -0.363 | -1.596 |
| C17H18N2O5S   | DB02925 | Piretanide                | -1.594 | -1.594 |
| C18H23NO3     | DB01551 | Dihydrocodeine            | 0.651  | -1.571 |
| C35H42N2O9    | DB01180 | Rescinnamine              | -1.538 | -1.569 |
| C21H32Cl2N4O  | DB06016 | Cariprazine               | -0.05  | -1.528 |
| C3H8O         | DB02325 | Isopropyl alcohol         | -1.523 | -1.523 |
| C23H31NO2     | DB01227 | Levacetylmethadol         | -1.483 | -1.486 |
| C43H74N2O14   | DB06145 | Spiramycin                | -1.432 | -1.481 |
| C35H62N4O4    | DB01338 | Pipecuronium              | -1.269 | -1.477 |
| C10H16O       | DB01744 | Camphor                   | -1.475 | -1.475 |
| C22H32O2      | DB03756 | Doconexent                | -1.468 | -1.47  |
| C24H27FN2O4   | DB04946 | Iloperidone               | 0.804  | -1.47  |
| C28H54N8      | DB06809 | Plerixafor                | -0.743 | -1.449 |
| C13H19NO4S    | DB01032 | Probenecid                | -1.446 | -1.446 |
| C12H14N4O2S   | DB01582 | Sulfamethazine            | -0.739 | -1.415 |
| C19H21NO4     | DB01183 | Naloxone                  | 0.693  | -1.411 |
| C8H8Cl3N3O4S2 | DB01021 | Trichlormethiazide        | -0.759 | -1.392 |
| C29H27F3N6O   | DB08901 | Ponatinib                 | -1.18  | -1.387 |
| C24H27FN2O4   | DB04946 | Iloperidone               | -1.36  | -1.372 |
| C11H12N4O2S   | DB01581 | Sulfamerazine             | -0.598 | -1.358 |
| C12H19N2O2    | DB01400 | Neostigmine               | -1.343 | -1.343 |
| C18H36O2      | DB03193 | Stearic acid              | -1.336 | -1.339 |
| C12H14N4O4S   | DB01299 | Sulfadoxine               | 0.277  | -1.328 |
| C56H78N2O16   | DB01135 | Doxacurium                | -1.315 | -1.315 |
| C12H18N2O3S   | DB01124 | Tolbutamide               | 0.764  | -1.315 |
| C26H28N3      | DB06816 | Pyrvinium                 | -1.299 | -1.299 |
| C26H29FN2O2   | DB01106 | Levocabastine             | -1.273 | -1.273 |
| N2O           | DB06690 | Nitrous oxide             | -1.219 | -1.219 |
| C17H25N3O2    | DB04876 | Vildagliptin              | -1.155 | -1.2   |
| C12H18N2O3S   | DB01124 | Tolbutamide               | -1.149 | -1.167 |
| C24H27N       | DB04825 | Prenylamine               | -1.163 | -1.163 |
| C9H9N3O2S2    | DB06147 | Sulfathiazole             | -0.474 | -1.155 |
| C31H44N2O5S   | DB04855 | Dronedarone               | 0.132  | -1.151 |
| C28H54N8      | DB06809 | Plerixafor                | 1.603  | -1.119 |

|               |         |                         |        |        |
|---------------|---------|-------------------------|--------|--------|
| C22H26CIN7O2S | DB01254 | Dasatinib               | -0.644 | -1.079 |
| C12H24O2      | DB03017 | Lauric acid             | -1.062 | -1.066 |
| C29H53NO5     | DB01083 | Orlistat                | -1.056 | -1.056 |
| C35H62N4O4    | DB01338 | Pipecuronium            | 1.044  | -1.041 |
| C38H69NO13    | DB01211 | Clarithromycin          | -1.008 | -1.015 |
| C64H82N18O13  | DB06825 | Triptorelin             | -0.463 | -0.998 |
| C18H14Cl4N2O  | DB01110 | Miconazole              | -0.787 | -0.994 |
| C12H13N       | DB01367 | Rasagiline              | -0.579 | -0.983 |
| C21H20Cl2O3   | DB04930 | Permethrin              | -0.973 | -0.973 |
| C6H12N3PS     | DB04572 | Thiotepa                | -0.944 | -0.944 |
| C35H62N4O4    | DB01338 | Pipecuronium            | 1.761  | -0.943 |
| C23H28CIN3O5S | DB01016 | Glyburide               | 1.063  | -0.92  |
| C28H36N4O2S   | DB08815 | Lurasidone              | -0.913 | -0.913 |
| C28H29NO4S    | DB06249 | Arzoxifene              | -0.874 | -0.89  |
| C14H22N2O2    | DB00989 | Rivastigmine            | -0.785 | -0.834 |
| C35H62N4O4    | DB01338 | Pipecuronium            | 0.072  | -0.737 |
| C12H21N       | DB01043 | Memantine               | -0.706 | -0.706 |
| C15H21N3O2    | DB00981 | Physostigmine           | 1.794  | -0.704 |
| GaN3O9        | DB05260 | Gallium nitrate         | -0.661 | -0.661 |
| C23H29N3O2S2  | DB01623 | Thiothixene             | 1.408  | -0.604 |
| C34H57N2O4    | DB01339 | Vecuronium              | -0.572 | -0.576 |
| C43H65N5O10   | DB00976 | Telithromycin           | 0.057  | -0.525 |
| C20H41NO3     | DB06689 | Ethanolamine oleate     | -0.484 | -0.487 |
| C5H11NO2      | DB01612 | Amyl Nitrite            | -0.423 | -0.423 |
| C22H31NO3     | DB01062 | Oxybutynin              | -0.343 | -0.422 |
| C13H11NO3     | DB06807 | Phenyl aminosaliclylate | 1.544  | -0.407 |
| C47H51NO14    | DB01229 | Paclitaxel              | -0.286 | -0.287 |
| C24H35N5O5    | DB04898 | Ximelagatran            | 0.443  | -0.256 |
| C26H37NO3     | DB06702 | Fesoterodine            | -0.205 | -0.207 |
| C21H23N7O2S   | DB06589 | Pazopanib               | -0.192 | -0.199 |
| C21H21F3IN3O2 | DB05239 | Cobimetinib             | -0.055 | -0.058 |
| C35H38Cl2N8O4 | DB01167 | Itraconazole            | 0.086  | 0.065  |
| C17H20BrNO    | DB01237 | Bromodiphenhydramine    | 0.08   | 0.066  |
| C24H28F3N3O3  | DB06608 | Tafenoquine             | 2.796  | 0.119  |
| C18H23FINO2   | DB08824 | Ioflupane I-123         | 2.444  | 0.207  |
| C31H44N2O5S   | DB04855 | Dronedarone             | 0.551  | 0.479  |
| C22H34O2      | DB08887 | Icosapent ethyl         | 0.509  | 0.509  |
| C22H48N       | DB04221 | Didecyldimethylammonium | 0.659  | 0.659  |
| C13H11NO3     | DB06807 | Phenyl aminosaliclylate | 0.699  | 0.676  |
| C15H21N3O3S   | DB01120 | Gliclazide              | 0.769  | 0.745  |
| C35H60N2O4    | DB01337 | Pancuronium             | 0.758  | 0.758  |
| C19H19N3O6    | DB06712 | Nilvadipine             | 1.284  | 1.284  |
| C16H38N2      | DB01245 | Decamethonium           | 1.635  | 1.635  |
| C47H64N4O12   | DB01201 | Rifapentine             | 2.59   | 1.73   |
| C43H58N4O12   | DB01045 | Rifampicin              | 4.618  | 2.394  |
| C19H42N       | DB01718 | Cetrimonium             | 2.422  | 2.422  |
| C47H64N4O12   | DB01201 | Rifapentine             | 3.611  | 2.534  |
| C34H41N7O5    | DB06695 | Dabigatran etexilate    | 3.553  | 2.818  |
| C47H64N4O12   | DB01201 | Rifapentine             | 3.772  | 3.425  |
| C47H64N4O12   | DB01201 | Rifapentine             | 6.282  | 4.289  |
| C15H21N3O2    | DB00981 | Physostigmine           | 5.624  | 5.615  |
| C37H61N2O4    | DB04834 | Rapacuronium            | 8.081  | 8.077  |

### FDA approved drugs with 6vw1, Table S7

| FORMULA     | DRUGBANK_ID | GENERIC_NAME | docking score | glide gscore |
|-------------|-------------|--------------|---------------|--------------|
| C23H46N6O13 | DB00452     | Framycetin   | -8.719        | -11.233      |
| C23H46N6O13 | DB00452     | Framycetin   | -8.588        | -10.865      |
| C25H43NO18  | DB00284     | Acarbose     | -10.017       | -10.649      |
| C23H46N6O13 | DB00452     | Framycetin   | -8.226        | -10.442      |

|                |         |                        |        |        |
|----------------|---------|------------------------|--------|--------|
| C23H46N6O13    | DB00452 | Framycetin             | -7.873 | -9.698 |
| C25H43NO18     | DB00284 | Acarbose               | -9.3   | -9.551 |
| C23H46N6O13    | DB00452 | Framycetin             | -6.151 | -8.782 |
| C10H17N3O6S    | DB00143 | Glutathione            | -5.387 | -8.09  |
| C21H29N7O14P2  | DB00157 | NADH                   | -8.042 | -8.042 |
| C22H43N5O13    | DB00479 | Amikacin               | -5.523 | -7.762 |
| C31H53N3O49S8  | DB00569 | Fondaparinux           | -7.094 | -7.76  |
| C29H39N5O8     | DB00560 | Tigecycline            | -6.485 | -7.592 |
| C18H37N5O9     | DB00684 | Tobramycin             | -6.062 | -7.59  |
| C20H22N8O5     | DB00563 | Methotrexate           | -7.482 | -7.547 |
| C23H46N6O13    | DB00452 | Framycetin             | -6.115 | -7.455 |
| C10H15N5O3     | DB00299 | Penciclovir            | -7.412 | -7.412 |
| C36H47N5O4     | DB00224 | Indinavir              | -7.013 | -7.403 |
| C29H39N5O8     | DB00560 | Tigecycline            | -7.261 | -7.395 |
| C23H46N6O13    | DB00452 | Framycetin             | -5.215 | -7.375 |
| C23H46N6O13    | DB00452 | Framycetin             | -5.501 | -7.362 |
| C15H22N6O5S    | DB00118 | Ademetionine           | -4.893 | -7.296 |
| C66H75Cl2N9O24 | DB00512 | Vancomycin             | -4.65  | -7.271 |
| C8H10NO6P      | DB00114 | Pyridoxal phosphate    | -4.764 | -7.263 |
| C7H11NO7P2     | DB00884 | Risedronic acid        | -7.042 | -7.23  |
| C17H20N4O6     | DB00140 | Riboflavin             | -7.159 | -7.159 |
| C21H43N5O7     | DB00798 | Gentamicin             | -6.921 | -7.096 |
| C22H43N5O13    | DB00479 | Amikacin               | -6.984 | -7.048 |
| C27H29NO10     | DB00694 | Daunorubicin           | -6.984 | -7.012 |
| C14H26CaO16    | DB00326 | Calcium glucoheptonate | -7.007 | -7.007 |
| C4H13NO7P2     | DB00630 | Alendronic acid        | -6.167 | -6.91  |
| C7H11NO7P2     | DB00884 | Risedronic acid        | -6.078 | -6.871 |
| C3H11NO7P2     | DB00282 | Pamidronic acid        | -6.755 | -6.866 |
| C12H22O11      | DB00581 | Lactulose              | -6.855 | -6.855 |
| C49H66N10O10S2 | DB00104 | Octreotide             | -6.087 | -6.797 |
| C22H43N5O13    | DB00479 | Amikacin               | -5.23  | -6.732 |
| C27H29NO11     | DB00445 | Epirubicin             | -6.692 | -6.719 |
| C23H46N6O13    | DB00452 | Framycetin             | -4.513 | -6.693 |
| C5H10N2O7P2    | DB00399 | Zoledronic acid        | -5.267 | -6.631 |
| C5H10N2O7P2    | DB00399 | Zoledronic acid        | -5.068 | -6.599 |
| C23H46N6O13    | DB00452 | Framycetin             | -5.86  | -6.545 |
| C23H46N6O13    | DB00452 | Framycetin             | -5.546 | -6.532 |
| C10H13N5O4     | DB00194 | Vidarabine             | -6.486 | -6.486 |
| C21H22N4O6S    | DB00293 | Raltitrexed            | -6.414 | -6.478 |
| C4H7NO4        | DB00128 | Aspartic acid          | -6.37  | -6.37  |
| C8H14N3O6P     | DB00369 | Cidofovir              | -6.072 | -6.368 |
| C8H11N5O3      | DB00787 | Acyclovir              | -6.355 | -6.355 |
| C3H11NO7P2     | DB00282 | Pamidronic acid        | -5.297 | -6.351 |
| C50H88N28O15   | DB00314 | Capreomycin            | -5.834 | -6.347 |
| C18H37N5O9     | DB00684 | Tobramycin             | -3.72  | -6.318 |
| C9H23NO7P2     | DB00710 | Ibandronate            | -6.213 | -6.304 |
| C8H5F3N2OS     | DB00740 | Riluzole               | -6.263 | -6.263 |
| C14H24N2O7     | DB00919 | Spectinomycin          | -5.974 | -6.225 |
| C13H20N6O4     | DB00577 | Valaciclovir           | -5.445 | -6.17  |
| C4H13NO7P2     | DB00630 | Alendronic acid        | -5.967 | -6.166 |
| C21H43N5O7     | DB00798 | Gentamicin             | -4.527 | -6.14  |
| C14H24N2O7     | DB00919 | Spectinomycin          | -4.713 | -6.082 |
| C28H31FN4O     | DB00637 | Astemizole             | -5.74  | -6.066 |
| C8H14N3O6P     | DB00369 | Cidofovir              | -5.513 | -6.066 |
| C8H10NO6P      | DB00114 | Pyridoxal phosphate    | -5.961 | -6.053 |
| C12H15N5O3     | DB00442 | Entecavir              | -6.051 | -6.051 |
| C9H15N5O3      | DB00360 | Sapropterin            | -6.039 | -6.051 |
| C19H25BN4O4    | DB00188 | Bortezomib             | -6.043 | -6.043 |
| C8H17NO5       | DB00491 | Miglitol               | -4.474 | -6.033 |
| C5H11NO2S      | DB00859 | Penicillamine          | -3.787 | -6.006 |
| C5H10N2O7P2    | DB00399 | Zoledronic acid        | -5.459 | -6.003 |
| C52H88N10O15   | DB00520 | Caspofungin            | -5.942 | -5.95  |
| C5H10N2O7P2    | DB00399 | Zoledronic acid        | -5.434 | -5.94  |

|                |         |                     |        |        |
|----------------|---------|---------------------|--------|--------|
| C21H41N5O7     | DB00955 | Netilmicin          | -3.403 | -5.934 |
| C8H12N4O5      | DB00928 | Azacitidine         | -5.508 | -5.925 |
| C49H66N10O10S2 | DB00104 | Octreotide          | -5.691 | -5.904 |
| C9H11F2N3O4    | DB00441 | Gemcitabine         | -3.183 | -5.904 |
| C47H73NO17     | DB00681 | Amphotericin B      | -4.258 | -5.898 |
| C18H23N9O4S3   | DB00229 | Cefotiam            | -5.796 | -5.896 |
| C21H41N5O7     | DB00955 | Netilmicin          | -5.181 | -5.891 |
| C46H64N14O12S2 | DB00035 | Desmopressin        | -5.888 | -5.888 |
| C10H11ClFN5O3  | DB00631 | Clofarabine         | -5.887 | -5.887 |
| C8H12N4O5      | DB00811 | Ribavirin           | -5.866 | -5.866 |
| C10H14N5O7P    | DB00131 | Adenosine phosphate | -5.773 | -5.865 |
| C23H46N6O13    | DB00452 | Framycetin          | -4.822 | -5.863 |
| C4H8N2O3       | DB00174 | Asparagine          | -5.858 | -5.858 |
| C9H13NO3       | DB00668 | Epinephrine         | -5.833 | -5.845 |
| C50H88N28O15   | DB00314 | Capreomycin         | -4.32  | -5.841 |
| C29H38N4O10    | DB00256 | Lymecycline         | -4.631 | -5.76  |
| C47H75NO17     | DB00646 | Nystatin            | -3.995 | -5.753 |
| C66H75Cl2N9O24 | DB00512 | Vancomycin          | -5.34  | -5.732 |
| C6H9N3O2       | DB00117 | Histidine           | -5.274 | -5.731 |
| C10H14N5O7P    | DB00131 | Adenosine phosphate | -4.577 | -5.726 |
| C21H43N5O7     | DB00798 | Gentamicin          | -4.206 | -5.715 |
| C21H21ClN2O8   | DB00618 | Demeclocycline      | -4.18  | -5.713 |
| C29H32O13      | DB00773 | Etoposide           | -5.708 | -5.709 |
| C19H24N4O2     | DB00738 | Pentamidine         | -5.692 | -5.692 |
| C33H47NO13     | DB00826 | Natamycin           | -4.048 | -5.689 |
| C8H15N7O2S3    | DB00927 | Famotidine          | -4.7   | -5.68  |
| C19H29NO5      | DB00449 | Dipivefrin          | -5.672 | -5.678 |
| C29H39N5O8     | DB00560 | Tigecycline         | -3.71  | -5.676 |
| C20H21N5O6     | DB00642 | Pemetrexed          | -5.648 | -5.648 |
| C14H19N5O4     | DB00426 | Famciclovir         | -5.647 | -5.647 |
| C22H25N3O7S    | DB00303 | Ertapenem           | -4.141 | -5.642 |
| C19H24N2O3     | DB00598 | Labetalol           | -5.611 | -5.639 |
| C3H7NO3        | DB00133 | Serine              | -5.633 | -5.633 |
| C11H16N4O4     | DB00380 | Dexrazoxane         | -4.68  | -5.608 |
| C19H19N7O6     | DB00158 | Folic acid          | -5.425 | -5.603 |
| C21H41N5O7     | DB00955 | Netilmicin          | -4.925 | -5.563 |
| C12H20N4O7     | DB00558 | Zanamivir           | -5.551 | -5.551 |
| C22H28GdN3O11  | DB00743 | Gadobenic acid      | -5.354 | -5.534 |
| C26H44O9       | DB00410 | Mupirocin           | -5.528 | -5.532 |
| CH3O5P         | DB00529 | Foscarnet           | -5.481 | -5.488 |
| C19H19N7O6     | DB00158 | Folic acid          | -4.126 | -5.471 |
| C34H36F3NO13   | DB00385 | Valrubicin          | -5.468 | -5.469 |
| C12H12N2O3     | DB00779 | Nalidixic acid      | -5.406 | -5.451 |
| C19H19N7O6     | DB00158 | Folic acid          | -4.298 | -5.439 |
| C21H29FO5      | DB00687 | Fludrocortisone     | -5.426 | -5.426 |
| CH4Cl2O6P2     | DB00720 | Clodronic acid      | -5.422 | -5.426 |
| C10H12ClN5O3   | DB00242 | Cladribine          | -5.422 | -5.422 |
| C20H34GdN5O10  | DB00538 | Gadoversetamide     | -2.721 | -5.418 |
| C8H15NO6       | DB00141 | N-Acetylglucosamine | -5.396 | -5.397 |
| C4H9NO3        | DB00156 | L-Threonine         | -5.395 | -5.395 |
| C18H23NO3      | DB00841 | Dobutamine          | -5.38  | -5.38  |
| C23H36O7       | DB00175 | Pravastatin         | -5.372 | -5.374 |
| C14H24N2O7     | DB00919 | Spectinomycin       | -4.536 | -5.367 |
| C12H13ClN4     | DB00205 | Pyrimethamine       | -4.577 | -5.363 |
| C14H20GdN3O10  | DB00789 | Gadopentetic acid   | -3.185 | -5.361 |
| C20H22N8O5     | DB00563 | Methotrexate        | -3.921 | -5.357 |
| C22H28GdN3O11  | DB00743 | Gadobenic acid      | -3.752 | -5.356 |
| C13H20N6O4     | DB00577 | Valaciclovir        | -5.148 | -5.354 |
| C18H22O4       | DB00179 | Masoprocol          | -5.346 | -5.346 |
| C20H34GdN5O10  | DB00538 | Gadoversetamide     | -3.092 | -5.318 |
| C14H11ClN2O4S  | DB00310 | Chlorthalidone      | -5.273 | -5.275 |
| C35H36ClNO3S   | DB00471 | Montelukast         | -5.273 | -5.273 |
| C29H38N4O10    | DB00256 | Lymecycline         | -3.136 | -5.266 |

|                |         |                     |        |        |
|----------------|---------|---------------------|--------|--------|
| C17H19N3O3S    | DB00736 | Esomeprazole        | -5.161 | -5.254 |
| C9H15N5O       | DB00350 | Minoxidil           | -5.245 | -5.245 |
| C9H23NO7P2     | DB00710 | Ibandronate         | -4.061 | -5.231 |
| C9H11FN2O5     | DB00322 | Floxuridine         | -5.192 | -5.222 |
| C9H15N5O3      | DB00360 | Sapropterin         | -2.899 | -5.217 |
| C20H32O5       | DB00917 | Dinoprostone        | -5.21  | -5.213 |
| C47H73NO17     | DB00681 | Amphotericin B      | -5.167 | -5.205 |
| C10H14O4       | DB00874 | Guaifenesin         | -5.15  | -5.15  |
| C18H37N5O9     | DB00684 | Tobramycin          | -4.879 | -5.15  |
| C21H43N5O7     | DB00798 | Gentamicin          | -3.449 | -5.146 |
| C13H8F2O3      | DB00861 | Diflunisal          | -5.133 | -5.133 |
| C10H17N3O6S    | DB00143 | Glutathione         | -5.083 | -5.089 |
| C9H13N3O3      | DB00943 | Zalcitabine         | -5.085 | -5.085 |
| C15H11I4NO4    | DB00509 | Dextrothyroxine     | -4.094 | -5.082 |
| C21H22N4O6S    | DB00293 | Raltitrexed         | -3.734 | -5.082 |
| C18H37N5O9     | DB00684 | Tobramycin          | -3.496 | -5.08  |
| C32H41NO2      | DB00342 | Terfenadine         | -5.074 | -5.077 |
| C14H20GdN3O10  | DB00789 | Gadopentetic acid   | -4.25  | -5.066 |
| C66H75Cl2N9O24 | DB00512 | Vancomycin          | -3.288 | -5.053 |
| C11H12Cl2N2O5  | DB00446 | Chloramphenicol     | -5.044 | -5.044 |
| C8H10FN3O3S    | DB00879 | Emtricitabine       | -5.03  | -5.03  |
| C20H24N2OS     | DB00777 | Propiomazine        | -5.019 | -5.021 |
| C18H37N5O9     | DB00684 | Tobramycin          | -3.406 | -5.017 |
| C11H16N4O4     | DB00552 | Pentostatin         | -3.282 | -5.016 |
| C20H34GdN5O10  | DB00538 | Gadoversetamide     | -3.138 | -5.012 |
| C11H12N2O2S    | DB00744 | Zileuton            | -4.986 | -5.005 |
| C7H7NO3        | DB00244 | Mesalazine          | -4.988 | -4.991 |
| C12H9N3O       | DB00235 | Milrinone           | -4.969 | -4.988 |
| C22H28GdN3O11  | DB00743 | Gadobenic acid      | -3.529 | -4.983 |
| C5H9NO4        | DB00142 | Glutamic Acid       | -4.977 | -4.977 |
| C22H30Cl2N10   | DB00878 | Chlorhexidine       | -4.943 | -4.953 |
| C10H21NO4      | DB00419 | Miglustat           | -2.896 | -4.942 |
| C16H17N3O4S    | DB00567 | Cephalexin          | -4.325 | -4.941 |
| C12H11N7       | DB00384 | Triamterene         | -4.939 | -4.939 |
| C8H15N3O7      | DB00428 | Streptozocin        | -4.934 | -4.934 |
| C22H24N2O9     | DB00595 | Oxytetracycline     | -4.647 | -4.918 |
| C11H12N2O2     | DB00150 | L-Tryptophan        | -4.916 | -4.916 |
| C21H41N5O7     | DB00955 | Netilmicin          | -2.984 | -4.906 |
| C5H10N2O3      | DB00130 | L-Glutamine         | -4.895 | -4.895 |
| C3H6N2O2       | DB00260 | Cycloserine         | -4.231 | -4.869 |
| C13H24NO10P    | DB00144 | Phosphatidyl serine | -4.851 | -4.864 |
| C22H29ClO5     | DB00240 | Alclometasone       | -4.836 | -4.836 |
| C21H28O5       | DB00860 | Prednisolone        | -4.832 | -4.832 |
| C15H17FN4O3    | DB00467 | Enoxacin            | -2.18  | -4.815 |
| C17H14N2O3     | DB00817 | Rosoxacin           | -3.525 | -4.8   |
| C11H16N4O4     | DB00380 | Dexrazoxane         | -4.189 | -4.797 |
| C19H24N2O3     | DB00598 | Labetalol           | -2.86  | -4.797 |
| C19H20FNO3     | DB00715 | Paroxetine          | -4.795 | -4.796 |
| C52H98N16O13   | DB00803 | Colistin            | -3.283 | -4.794 |
| C10H19N3O2     | DB00226 | Guanadrel           | -4.786 | -4.786 |
| C21H27ClN2O2   | DB00557 | Hydroxyzine         | -4.463 | -4.781 |
| C22H28F2O5     | DB00223 | Diflorasone         | -4.777 | -4.777 |
| C16H15F2N3O4S  | DB00213 | Pantoprazole        | -4.474 | -4.776 |
| C15H22N6O5S    | DB00118 | Ademetionine        | -4.752 | -4.762 |
| C10H21NO4      | DB00419 | Miglustat           | -4.741 | -4.76  |
| C11H15NO5      | DB00423 | Methocarbamol       | -4.74  | -4.74  |
| C8H11N3O3S     | DB00709 | Lamivudine          | -4.736 | -4.736 |
| C7H6O3         | DB00936 | Salicylic acid      | -4.735 | -4.735 |
| C22H36N2O5S    | DB00775 | Tirofiban           | -4.73  | -4.73  |
| C29H38N4O10    | DB00256 | Lymecycline         | -2.869 | -4.728 |
| C23H32N2O5     | DB00178 | Ramipril            | -4.519 | -4.725 |
| C7H4ClNO2      | DB00356 | Chlorzoxazone       | -4.687 | -4.72  |
| C8H11NO3       | DB00165 | Pyridoxine          | -4.005 | -4.72  |



|               |         |                           |        |        |
|---------------|---------|---------------------------|--------|--------|
| C19H27N3O5S2  | DB00204 | Dofetilide                | -4.651 | -4.717 |
| C8H15N7O2S3   | DB00927 | Famotidine                | -3.906 | -4.713 |
| C16H16ClNO3   | DB00800 | Fenoldopam                | -2.701 | -4.689 |
| C20H34GdN5O10 | DB00538 | Gadoversetamide           | -3.171 | -4.685 |
| C20H25ClN2O5  | DB00381 | Amlodipine                | -4.679 | -4.684 |
| C28H46N6O8S   | DB00895 | Benzyloxyethyl Polylysine | -4.673 | -4.673 |
| C21H21ClN2O8  | DB00618 | Demeclocycline            | -3.637 | -4.669 |
| C26H34FNO5    | DB00439 | Cerivastatin              | -4.636 | -4.659 |
| C9H7Cl2N5     | DB00555 | Lamotrigine               | -2.837 | -4.657 |
| C15H18N4O5    | DB00305 | Mitomycin                 | -4.631 | -4.648 |
| C22H28F2O5    | DB00663 | Flumethasone              | -4.647 | -4.647 |
| C24H26N6O3    | DB00275 | Olmesartan                | -3.526 | -4.64  |
| C21H21ClN2O8  | DB00618 | Demeclocycline            | -4.442 | -4.638 |
| C7H7NO3       | DB00233 | Aminosalicylic Acid       | -4.635 | -4.636 |
| C8H10N4O2     | DB00824 | Enprofylline              | -4.577 | -4.636 |
| C8H11NO3      | DB00368 | Norepinephrine            | -2.541 | -4.636 |
| C22H22N6O7S2  | DB00438 | Ceftazidime               | -4.635 | -4.635 |
| C24H26N6O3    | DB00275 | Olmesartan                | -4.532 | -4.63  |
| C12H20N2O3S   | DB00489 | Sotalol                   | -4.607 | -4.628 |
| C12H18N2O3    | DB00418 | Secobarbital              | -4.523 | -4.625 |
| C21H30O5      | DB00741 | Hydrocortisone            | -4.623 | -4.623 |
| C5H9N3        | DB00272 | Betazole                  | -4.213 | -4.623 |
| C22H24N2O9    | DB00595 | Oxytetracycline           | -2.239 | -4.617 |
| C21H43N5O7    | DB00798 | Gentamicin                | -2.621 | -4.61  |
| C24H33N3O4    | DB00243 | Ranolazine                | -2.755 | -4.609 |
| C8H17NO5      | DB00491 | Miglitol                  | -4.557 | -4.601 |
| C16H14ClN3O   | DB00475 | Chlordiazepoxide          | -3.015 | -4.591 |
| C9H13NO3      | DB00668 | Epinephrine               | -2.245 | -4.59  |
| C13H21NO3     | DB00221 | Isoetarine                | -4.586 | -4.586 |
| C16H14ClN3O   | DB00475 | Chlordiazepoxide          | -4.529 | -4.577 |
| C18H19N3O6S   | DB00689 | Cephaloglycin             | -4.325 | -4.575 |
| C10H13N5O4    | DB00640 | Adenosine                 | -4.572 | -4.572 |
| C8H9NO5       | DB00766 | Clavulanic acid           | -4.568 | -4.568 |
| C20H34GdN5O10 | DB00538 | Gadoversetamide           | -4.468 | -4.568 |
| C11H10BrN5    | DB00484 | Brimonidine               | -4.507 | -4.556 |
| C10H24N2O2    | DB00330 | Ethambutol                | -4.377 | -4.555 |
| C13H24NO10P   | DB00144 | Phosphatidyl serine       | -2.267 | -4.551 |
| C25H24N8O7S2  | DB00430 | Cefpiramide               | -4.546 | -4.546 |
| C22H24ClFN4O3 | DB00317 | Gefitinib                 | -4.138 | -4.544 |
| C8H11NO3      | DB00165 | Pyridoxine                | -1.889 | -4.543 |
| C18H37N5O9    | DB00684 | Tobramycin                | -3.189 | -4.541 |
| C12H13ClN4    | DB00205 | Pyrimethamine             | -3.804 | -4.54  |
| C18H19N3O     | DB00904 | Ondansetron               | -4.41  | -4.535 |
| C8H12N4O5     | DB00928 | Azacitidine               | -1.851 | -4.535 |
| C15H17N7O5S3  | DB00274 | Cefmetazole               | -4.534 | -4.534 |
| C41H64O14     | DB00390 | Digoxin                   | -4.534 | -4.534 |
| C25H31F3O5S   | DB00588 | Fluticasone propionate    | -4.532 | -4.532 |
| C12H12N2O3    | DB00779 | Nalidixic acid            | -2.97  | -4.531 |
| C15H18N4O5    | DB00305 | Mitomycin                 | -2.393 | -4.531 |
| C5H5N5        | DB00173 | Adenine                   | -2.532 | -4.529 |
| C22H28GdN3O11 | DB00743 | Gadobenidic acid          | -3.105 | -4.527 |
| C26H34FNO5    | DB00439 | Cerivastatin              | -2.587 | -4.523 |
| C26H29N3O6    | DB00622 | Nicardipine               | -3.828 | -4.521 |
| C22H26F3N3OS  | DB00623 | Fluphenazine              | -4.181 | -4.517 |
| C20H15F3N4O3  | DB00685 | Trovafloxacin             | -2.475 | -4.514 |
| C33H47NO13    | DB00826 | Natamycin                 | -4.472 | -4.51  |
| C26H37N5O2    | DB00248 | Cabergoline               | -4.272 | -4.506 |
| C17H19NO3     | DB00295 | Morphine                  | -4.444 | -4.503 |
| C5H4N4O       | DB00437 | Allopurinol               | -4.396 | -4.499 |
| C20H21N7O6S2  | DB00923 | Ceforanide                | -4.468 | -4.492 |
| C20H23N       | DB00321 | Amitriptyline             | -4.476 | -4.48  |
| C12H15N3O2S   | DB00518 | Albendazole               | -2.589 | -4.475 |
| C10H13N5O4    | DB00495 | Zidovudine                | -4.466 | -4.467 |

|              |         |                       |        |        |
|--------------|---------|-----------------------|--------|--------|
| C5H9NO2      | DB00172 | Proline               | -4.462 | -4.462 |
| C8H10NO6P    | DB00114 | Pyridoxal phosphate   | -3.016 | -4.431 |
| C7H8N4O2     | DB00277 | Theophylline          | -4.391 | -4.423 |
| C37H49N7O9S  | DB00183 | Pentagastrin          | -4.421 | -4.422 |
| C3H7NO2S     | DB00151 | L-Cysteine            | -2.202 | -4.421 |
| C14H18N2O3   | DB00474 | Methohexital          | -4.358 | -4.415 |
| C36H41N3O6   | DB00528 | Lercanidipine         | -4.384 | -4.414 |
| C21H27NO4    | DB00844 | Nalbuphine            | -4.384 | -4.414 |
| C14H11NO5    | DB00323 | Tolcapone             | -1.859 | -4.414 |
| C5H4N4O      | DB00437 | Allopurinol           | -3.231 | -4.409 |
| C10H11F3N2O5 | DB00432 | Trifluridine          | -3.208 | -4.402 |
| C21H41N5O7   | DB00955 | Netilmicin            | -1.993 | -4.402 |
| C6H14O6      | DB00742 | Mannitol              | -4.401 | -4.401 |
| C10H14N2O4   | DB00190 | Carbidopa             | -4.394 | -4.394 |
| C17H21NO3    | DB00867 | Ritodrine             | -4.369 | -4.382 |
| C22H29FO5    | DB00443 | Betamethasone         | -4.381 | -4.381 |
| C26H37N5O2   | DB00248 | Cabergoline           | -3.711 | -4.379 |
| C8H10N4O2    | DB00824 | Enprofylline          | -2.906 | -4.379 |
| C4H11N5      | DB00331 | Metformin             | -4.367 | -4.37  |
| C4H6N2S      | DB00763 | Methimazole           | -4.363 | -4.363 |
| C22H25N3O7S  | DB00303 | Ertapenem             | -4.314 | -4.363 |
| C21H41N5O7   | DB00955 | Netilmicin            | -3.26  | -4.354 |
| C5H9NO3      | DB00855 | Aminolevulinic acid   | -4.106 | -4.324 |
| C9H9Cl2N3    | DB00575 | Clonidine             | -4.291 | -4.314 |
| C32H39NO4    | DB00950 | Fexofenadine          | -4.313 | -4.313 |
| C15H15NO2S   | DB00745 | Modafinil             | -4.312 | -4.312 |
| C27H41NO6    | DB00769 | Hydrocortamate        | -4.213 | -4.311 |
| C11H16N4O4   | DB00552 | Pentostatin           | -4.265 | -4.297 |
| C20H23NS     | DB00340 | Metixene              | -4.291 | -4.292 |
| C23H31NO7    | DB00688 | Mycophenolate mofetil | -4.219 | -4.289 |
| C4H9N3O2     | DB00148 | Creatine              | -4.286 | -4.286 |
| C14H11NO5    | DB00323 | Tolcapone             | -2.744 | -4.281 |
| C4H6O4S2     | DB00566 | Succimer              | -4.28  | -4.28  |
| C20H36N2O3S  | DB00308 | Ibutilide             | -4.258 | -4.269 |
| C13H17N5O8S2 | DB00355 | Aztreonam             | -4.268 | -4.268 |
| C8H10NO6P    | DB00114 | Pyridoxal phosphate   | -2.309 | -4.267 |
| C5H9NO3      | DB00855 | Aminolevulinic acid   | -3.558 | -4.257 |
| C8H6N4O5     | DB00698 | Nitrofurantoin        | -4.184 | -4.256 |
| C24H31FO6    | DB00180 | Flunisolide           | -4.247 | -4.247 |
| C17H25N3O2S  | DB00952 | Naratriptan           | -4.241 | -4.242 |
| C13H13N3O3   | DB00480 | Lenalidomide          | -4.239 | -4.239 |
| C10H15N3     | DB00217 | Bethanidine           | -4.23  | -4.23  |
| C16H20N4O3S  | DB00214 | Torasemide            | -1.605 | -4.229 |
| C10H12N4O3   | DB00900 | Didanosine            | -3.02  | -4.228 |
| C16H16ClNO3  | DB00800 | Fenoldopam            | -4.198 | -4.224 |
| C24H34N2O5   | DB00519 | Trandolapril          | -4.01  | -4.215 |
| C19H23NO3    | DB00234 | Reboxetine            | -2.5   | -4.209 |
| C17H14N2O3   | DB00817 | Rosoxacin             | -4.135 | -4.208 |
| C21H41N5O7   | DB00955 | Netilmicin            | -2.437 | -4.205 |
| C25H48N6O8   | DB00746 | Deferoxamine          | -4.203 | -4.203 |
| C17H23NO     | DB00854 | Levorphanol           | -4.192 | -4.197 |
| C26H29NO     | DB00675 | Tamoxifen             | -4.177 | -4.197 |
| C11H16N2O3   | DB00241 | Butalbital            | -4.128 | -4.183 |
| C21H26O5     | DB00635 | Prednisone            | -4.182 | -4.182 |
| C20H28N2O5   | DB00584 | Enalapril             | -3.431 | -4.182 |
| C25H37NO4    | DB00938 | Salmeterol            | -4.174 | -4.179 |
| C9H11F2N3O4  | DB00441 | Gemcitabine           | -4.173 | -4.179 |
| C23H34O5     | DB00374 | Treprostinil          | -4.161 | -4.161 |
| CH5N3        | DB00536 | Guanidine             | -4.16  | -4.16  |
| C17H20N2O2   | DB00809 | Tropicamide           | -1.598 | -4.157 |
| C11H17NO3    | DB00816 | Orciprenaline         | -1.944 | -4.155 |
| C10H14N4O4   | DB00651 | Dyphylline            | -4.147 | -4.147 |
| C13H6Cl6O2   | DB00756 | Hexachlorophene       | -1.622 | -4.144 |

|               |         |                        |        |        |
|---------------|---------|------------------------|--------|--------|
| C7H8N4O2      | DB00277 | Theophylline           | -2.31  | -4.143 |
| C24H30F2O6    | DB00591 | Fluocinolone acetonide | -4.131 | -4.131 |
| C21H27FO6     | DB00620 | Triamcinolone          | -4.122 | -4.122 |
| C16H17N9O5S3  | DB00267 | Cefmenoxime            | -4.12  | -4.12  |
| C14H13N5O5S2  | DB00535 | Cefdinir               | -4.119 | -4.119 |
| C6H12N2O4S2   | DB00138 | Cystine                | -2.319 | -4.114 |
| C21H27CIN2O2  | DB00557 | Hydroxyzine            | -3.504 | -4.108 |
| C6H13N3O3     | DB00155 | L-Citrulline           | -4.103 | -4.103 |
| C22H22FN3O2   | DB00450 | Droperidol             | -2.989 | -4.101 |
| C22H24N2O8    | DB00759 | Tetracycline           | -3.957 | -4.096 |
| C5H11NO2S     | DB00134 | Methionine             | -4.088 | -4.088 |
| C14H13N3O4S2  | DB00814 | Meloxicam              | -1.918 | -4.087 |
| C6H8CIN7O     | DB00594 | Amiloride              | -4.083 | -4.084 |
| C17H18F3NO    | DB00472 | Fluoxetine             | -4.081 | -4.082 |
| C20H22CIN3O   | DB00613 | Amodiaquine            | -3.488 | -4.082 |
| C6H13NO2      | DB00167 | Isoleucine             | -4.078 | -4.078 |
| C18H23N9O4S3  | DB00229 | Cefotiam               | -2.973 | -4.075 |
| C21H41N5O7    | DB00955 | Netilmicin             | -1.605 | -4.055 |
| C8H11NO3      | DB00368 | Norepinephrine         | -4.036 | -4.053 |
| C14H16N4      | DB00724 | Imiquimod              | -3.555 | -4.041 |
| C6H8O6        | DB00126 | Ascorbic acid          | -4.038 | -4.038 |
| C27H29NO11    | DB00445 | Epirubicin             | -2.192 | -4.032 |
| C15H17FN4O3   | DB00467 | Enoxacin               | -3.983 | -4.03  |
| C12H18N2O4    | DB00211 | Midodrine              | -3.922 | -4.03  |
| C24H33N3O4    | DB00243 | Ranolazine             | -3.995 | -4.026 |
| C14H20GdN3O10 | DB00789 | Gadopentetic acid      | -3.787 | -4.025 |
| C18H31NO4     | DB00612 | Bisoprolol             | -4.022 | -4.023 |
| C17H21NO4     | DB00747 | Scopolamine            | -3.803 | -4.016 |
| C12H18N2O4    | DB00211 | Midodrine              | -2.952 | -4.013 |
| C22H22N2O8    | DB00931 | Metacycline            | -3.709 | -4.004 |
| C17H19N3O3S   | DB00338 | Omeprazole             | -3.964 | -3.998 |
| C23H32N2O5    | DB00178 | Ramipril               | -3.269 | -3.995 |
| C36H47N5O4    | DB00224 | Indinavir              | -2.845 | -3.991 |
| C9H9Cl2N3     | DB00575 | Clonidine              | -2.057 | -3.99  |
| C9H8CIN5S     | DB00697 | Tizanidine             | -3.152 | -3.989 |
| C17H25N3O5S   | DB00760 | Meropenem              | -2.188 | -3.989 |
| C8H11NO3      | DB00165 | Pyridoxine             | -3.756 | -3.98  |
| C20H17FO3S    | DB00605 | Sulindac               | -3.976 | -3.976 |
| C27H41NO6     | DB00769 | Hydrocortamate         | -2.86  | -3.975 |
| C52H98N16O13  | DB00803 | Colistin               | -2.642 | -3.974 |
| C22H22N2O8    | DB00931 | Metacycline            | -1.703 | -3.968 |
| C14H20GdN3O10 | DB00789 | Gadopentetic acid      | -2.125 | -3.965 |
| C3H7O4P       | DB00828 | Fosfomycin             | -3.336 | -3.962 |
| C8H11Cl2N3O2  | DB00791 | Uracil mustard         | -2.029 | -3.961 |
| C5H5N5S       | DB00352 | Tioguanine             | -1.782 | -3.957 |
| C16H15N3      | DB00751 | Epinastine             | -3.915 | -3.954 |
| C9H10N2O3     | DB00345 | Aminohippuric acid     | -3.949 | -3.949 |
| C27H29NO10    | DB00694 | Daunorubicin           | -2.108 | -3.948 |
| C15H12ClNO2   | DB00821 | Carprofen              | -3.943 | -3.944 |
| C6H12N2O4S2   | DB00138 | Cystine                | -3.914 | -3.944 |
| C13H22N4O3S   | DB00863 | Ranitidine             | -3.488 | -3.94  |
| C20H22CIN3O   | DB00613 | Amodiaquine            | -1.374 | -3.939 |
| C17H21NO3     | DB00674 | Galantamine            | -3.921 | -3.938 |
| C13H16N2      | DB00633 | Dexmedetomidine        | -3.149 | -3.936 |
| C20H15F3N4O3  | DB00685 | Trovafloxacin          | -2.039 | -3.935 |
| C21H21CIN2O8  | DB00618 | Demeclocycline         | -1.526 | -3.93  |
| C32H45N3O4S   | DB00220 | Nelfinavir             | -1.696 | -3.928 |
| C19H21N       | DB00540 | Nortriptyline          | -3.92  | -3.92  |
| C18H19N3O3S   | DB00412 | Rosiglitazone          | -2.543 | -3.92  |
| C23H31NO7     | DB00688 | Mycophenolate mofetil  | -2.202 | -3.91  |
| C16H14F3N3O2S | DB00448 | Lansoprazole           | -3.888 | -3.908 |
| C18H29NO3     | DB00195 | Betaxolol              | -3.904 | -3.906 |
| C6H10N6O      | DB00851 | Dacarbazine            | -3.87  | -3.903 |

|               |         |                      |        |        |
|---------------|---------|----------------------|--------|--------|
| C26H35F3O6    | DB00287 | Travoprost           | -3.899 | -3.899 |
| C17H20FN3O3   | DB00487 | Pefloxacin           | -2.336 | -3.894 |
| C12H12N2O2S   | DB00250 | Dapsone              | -3.886 | -3.886 |
| C5H5N5S       | DB00352 | Tioguanine           | -3.868 | -3.886 |
| C10H14N2      | DB00184 | Nicotine             | -1.977 | -3.885 |
| C22H24N2O8    | DB00759 | Tetracycline         | -2.806 | -3.853 |
| C17H17ClO6    | DB00400 | Griseofulvin         | -3.846 | -3.846 |
| C6H9N3O2      | DB00117 | Histidine            | -2.119 | -3.84  |
| C19H21N5O4    | DB00457 | Prazosin             | -1.539 | -3.839 |
| C10H16N2O3    | DB00237 | Butabarbital         | -3.795 | -3.83  |
| C21H23ClFNO2  | DB00502 | Haloperidol          | -3.815 | -3.828 |
| C21H27N3O2    | DB00247 | Methysergide         | -3.576 | -3.828 |
| C15H12N2O2    | DB00776 | Oxcarbazepine        | -3.824 | -3.824 |
| C18H19ClN4    | DB00363 | Clozapine            | -3.795 | -3.821 |
| C21H31N3O5    | DB00722 | Lisinopril           | -2.823 | -3.82  |
| C17H19N3O3S   | DB00736 | Esomeprazole         | -2.048 | -3.817 |
| C17H23NO3     | DB00572 | Atropine             | -3.811 | -3.814 |
| C9H11N2O5     | DB00249 | Idoxuridine          | -1.605 | -3.814 |
| C7H15NO3      | DB00583 | Levocarnitine        | -3.809 | -3.809 |
| C9H11ClO3     | DB00856 | Chlorphenesin        | -3.801 | -3.801 |
| C11H12N2S     | DB00848 | Levamisole           | -3.716 | -3.798 |
| C16H15N5O7S2  | DB00671 | Cefixime             | -3.795 | -3.795 |
| C32H32O13S    | DB00444 | Teniposide           | -3.794 | -3.795 |
| C41H76N2O15   | DB00778 | Roxithromycin        | -1.155 | -3.794 |
| C20H30O2      | DB00159 | Icosapent            | -3.789 | -3.792 |
| C18H21NO3     | DB00318 | Codeine              | -3.742 | -3.787 |
| C16H15F2N3O4S | DB00213 | Pantoprazole         | -2.095 | -3.787 |
| C12H9N3O5S    | DB00507 | Nitazoxanide         | -1.598 | -3.782 |
| C6H10N6O      | DB00851 | Dacarbazine          | -2.034 | -3.78  |
| C11H12N2O2S   | DB00744 | Zileuton             | -1.715 | -3.776 |
| C17H20N2O2    | DB00809 | Tropicamide          | -3.766 | -3.774 |
| C11H17NO3     | DB00723 | Methoxamine          | -1.364 | -3.773 |
| C10H16N6S     | DB00501 | Cimetidine           | -3.216 | -3.769 |
| C12H10N2O5    | DB00827 | Cinoxacin            | -1.922 | -3.766 |
| C17H21NO3     | DB00674 | Galantamine          | -1.65  | -3.766 |
| C22H32O3      | DB00253 | Medrysone            | -3.765 | -3.765 |
| C8H8Cl2N4     | DB00629 | Guanabenz            | -3.76  | -3.76  |
| C22H24N2O8    | DB00254 | Doxycycline          | -3.526 | -3.758 |
| C11H16N4O4    | DB00380 | Dexrazoxane          | -2.565 | -3.758 |
| C17H22N4O     | DB00805 | Minaprine            | -3.661 | -3.756 |
| C12H10N2O5    | DB00827 | Cinoxacin            | -3.726 | -3.753 |
| C17H19NO3     | DB00295 | Morphine             | -1.18  | -3.752 |
| C10H11F3N2O5  | DB00432 | Trifluridine         | -3.667 | -3.751 |
| C16H17N3O4S   | DB00567 | Cephalexin           | -3.487 | -3.746 |
| C17H19N3O3S   | DB00736 | Esomeprazole         | -2.349 | -3.744 |
| C9H18N6       | DB00488 | Altretamine          | -3.694 | -3.743 |
| C20H30NO3     | DB00332 | Ipratropium          | -3.741 | -3.741 |
| C18H19N3O3S   | DB00412 | Rosiglitazone        | -3.217 | -3.741 |
| C9H13N        | DB00182 | Amphetamine          | -3.737 | -3.738 |
| C13H22N4O3S   | DB00863 | Ranitidine           | -1.699 | -3.731 |
| C24H33FO6     | DB00846 | Flurandrenolide      | -3.729 | -3.729 |
| C17H17ClN6O3  | DB00402 | Eszopiclone          | -3.376 | -3.726 |
| C15H12N2O     | DB00564 | Carbamazepine        | -3.707 | -3.707 |
| C20H23N7O7    | DB00650 | Leucovorin           | -3.707 | -3.707 |
| C13H24N4O3S   | DB00373 | Timolol              | -3.703 | -3.704 |
| C12H11ClN2O5S | DB00695 | Furosemide           | -3.703 | -3.703 |
| C10H18O21S4   | DB00686 | Pentosan Polysulfate | -3.698 | -3.698 |
| C16H24N2O3    | DB00521 | Carteolol            | -3.697 | -3.698 |
| C2H5NO2       | DB00551 | Acetohydroxamic acid | -3.681 | -3.684 |
| C20H25N3O2    | DB00353 | Methylergometrine    | -3.43  | -3.683 |
| C15H10Cl2N2O2 | DB00186 | Lorazepam            | -3.677 | -3.677 |
| C23H27N5O7S   | DB00319 | Piperacillin         | -3.674 | -3.675 |
| C16H20FN3O4   | DB00601 | Linezolid            | -3.673 | -3.673 |

|                |         |                           |        |        |
|----------------|---------|---------------------------|--------|--------|
| C6H14N2O2      | DB00123 | L-Lysine                  | -3.673 | -3.673 |
| C20H24N2O      | DB00192 | Indecainide               | -3.67  | -3.671 |
| C22H22N2O8     | DB00931 | Metacycline               | -1.334 | -3.668 |
| C10H12N2O4     | DB00649 | Stavudine                 | -3.664 | -3.665 |
| C37H48N6O5S2   | DB00503 | Ritonavir                 | -3.663 | -3.663 |
| C20H23NO4      | DB00704 | Naltrexone                | -1.933 | -3.663 |
| C18H14N4O5S    | DB00795 | Sulfasalazine             | -2.355 | -3.662 |
| C18H20O2       | DB00255 | Diethylstilbestrol        | -3.66  | -3.661 |
| C11H16N4O4     | DB00380 | Dexrazoxane               | -2.78  | -3.653 |
| C21H27N3O2     | DB00247 | Methysergide              | -3.024 | -3.651 |
| C15H19N5       | DB00953 | Rizatriptan               | -3.644 | -3.648 |
| C12H20N2O3S    | DB00489 | Sotalol                   | -1.661 | -3.644 |
| C19H22FN3O3    | DB00365 | Grepafloxacin             | -2.63  | -3.638 |
| C17H21NO3      | DB00867 | Ritodrine                 | -1.33  | -3.637 |
| C20H26N2       | DB00726 | Trimipramine              | -3.635 | -3.635 |
| C5H11Cl2N      | DB00888 | Mechlorethamine           | -2.282 | -3.627 |
| C11H17NO3      | DB00723 | Methoxamine               | -3.615 | -3.626 |
| C24H31ClO7     | DB14596 | Loteprednol etabonate     | -3.625 | -3.625 |
| C21H21N        | DB00735 | Naftifine                 | -3.544 | -3.624 |
| C15H14ClN3O4S3 | DB00562 | Benzthiazide              | -3.072 | -3.62  |
| C24H36O3       | DB00486 | Nabilone                  | -3.616 | -3.616 |
| C17H14F3N3O2S  | DB00482 | Celecoxib                 | -3.615 | -3.616 |
| C19H19NOS      | DB00920 | Ketotifen                 | -1.033 | -3.608 |
| C17H23NO3      | DB00424 | Hyoscyamine               | -3.604 | -3.607 |
| C45H54N4O8     | DB00361 | Vinorelbine               | -2.163 | -3.598 |
| C16H18N2O5S    | DB00417 | Phenoxymethylpenicillin   | -3.597 | -3.597 |
| C10H16N6S      | DB00501 | Cimetidine                | -1.091 | -3.596 |
| C8H8N2O3S      | DB00909 | Zonisamide                | -3.59  | -3.591 |
| C22H24N2O9     | DB00595 | Oxytetracycline           | -2.932 | -3.591 |
| C5H4N4O        | DB00437 | Allopurinol               | -1.145 | -3.587 |
| C33H37N5O5     | DB00320 | Dihydroergotamine         | -1.397 | -3.583 |
| C15H16O2       | DB00461 | Nabumetone                | -3.582 | -3.582 |
| C17H17NO2      | DB00714 | Apomorphine               | -2.017 | -3.581 |
| C22H29FO4      | DB00547 | Desoximetasone            | -3.579 | -3.579 |
| C17H20FN3O3    | DB00487 | Pefloxacin                | -3.411 | -3.572 |
| C21H30O2       | DB00470 | Dronabinol                | -3.571 | -3.571 |
| C23H25N5O5     | DB00590 | Doxazosin                 | -2.531 | -3.569 |
| C11H16N2O3     | DB00241 | Butalbital                | -2.128 | -3.569 |
| C9H11FN2O5     | DB00322 | Floxuridine               | -1.779 | -3.565 |
| C21H41N5O7     | DB00955 | Netilmicin                | -1.432 | -3.562 |
| C21H27ClN2O2   | DB00557 | Hydroxyzine               | -1.836 | -3.561 |
| C9H8O4         | DB00945 | Acetylsalicylic acid      | -3.56  | -3.56  |
| C5H5N5         | DB00173 | Adenine                   | -3.535 | -3.555 |
| C20H12O5       | DB00693 | Fluorescein               | -3.338 | -3.554 |
| C14H14O3       | DB00788 | Naproxen                  | -3.548 | -3.548 |
| C8H17NO2       | DB00230 | Pregabalin                | -3.544 | -3.544 |
| C12H17N4OS     | DB00152 | Thiamine                  | -3.521 | -3.54  |
| C19H27N5O4     | DB00346 | Alfuzosin                 | -3.539 | -3.539 |
| C17H17NO2      | DB00714 | Apomorphine               | -3.493 | -3.537 |
| C23H24N2O4S    | DB00876 | Eprosartan                | -1.792 | -3.527 |
| C10H13ClN2O3S  | DB00672 | Chlorpropamide            | -0.889 | -3.525 |
| C23H25F3N2OS   | DB00875 | Flupentixol               | -3.284 | -3.523 |
| C8H14O2S2      | DB00166 | Lipoic Acid               | -3.516 | -3.519 |
| C19H32N2O5     | DB00790 | Perindopril               | -3.263 | -3.518 |
| C25H30NO3      | DB00209 | Trospium                  | -3.516 | -3.516 |
| C15H17FN4O3    | DB00467 | Enoxacin                  | -1.893 | -3.516 |
| C17H28N2O3     | DB00892 | Oxybuprocaine             | -1.527 | -3.514 |
| C14H10F3NO5    | DB00348 | Nitisinone                | -3.51  | -3.51  |
| C17H24BrNO3    | DB00725 | Homatropine methylbromide | -3.504 | -3.505 |
| C10H21N3O      | DB00711 | Diethylcarbamazine        | -3.151 | -3.503 |
| C4H6O4         | DB00139 | Succinic acid             | -0.831 | -3.5   |
| C6H13NO2       | DB00149 | L-Leucine                 | -3.499 | -3.499 |
| C3H6N2O2       | DB00260 | Cycloserine               | -3.246 | -3.493 |

|               |         |                         |        |        |
|---------------|---------|-------------------------|--------|--------|
| C15H14ClN3O4S | DB00833 | Cefaclor                | -3.26  | -3.492 |
| C26H29N3O6    | DB00622 | Nicardipine             | -3.267 | -3.488 |
| C22H38O5      | DB00929 | Misoprostol             | -3.487 | -3.487 |
| C18H24BrNO4   | DB00462 | Methscopolamine bromide | -3.486 | -3.486 |
| C9H13NO2      | DB00610 | Metaraminol             | -1.077 | -3.486 |
| C17H20FN3O3   | DB00487 | Pefloxacin              | -2.351 | -3.478 |
| C21H26O3      | DB00459 | Acitretin               | -3.474 | -3.477 |
| C29H50O2      | DB00163 | Vitamin E               | -3.474 | -3.474 |
| C16H21NO2     | DB00571 | Propranolol             | -3.471 | -3.473 |
| C23H31NO7     | DB00688 | Mycophenolate mofetil   | -1.717 | -3.472 |
| C20H12O5      | DB00693 | Fluorescein             | -2.754 | -3.464 |
| C9H13NO2      | DB00388 | Phenylephrine           | -0.795 | -3.456 |
| C15H12I3NO4   | DB00279 | Liothyronine            | -3.347 | -3.45  |
| C27H44O3      | DB00910 | Paricalcitol            | -3.448 | -3.448 |
| C10H12N4O3    | DB00900 | Didanosine              | -3.364 | -3.447 |
| C19H22FN3O3   | DB00365 | Grepafloxacin           | -3.325 | -3.444 |
| C21H28N2O5    | DB00662 | Trimethobenzamide       | -1.43  | -3.443 |
| C25H47NO8     | DB00429 | Carboprost tromethamine | -3.437 | -3.44  |
| C12H18N2O3    | DB00418 | Secobarbital            | -1.933 | -3.437 |
| C20H32N5O8P   | DB00718 | Adefovir dipivoxil      | -3.434 | -3.434 |
| C6H6N6O2      | DB00853 | Temozolomide            | -3.433 | -3.434 |
| C17H17ClN6O3  | DB00402 | Eszopiclone             | -2.954 | -3.432 |
| C5H5N3O       | DB00339 | Pyrazinamide            | -3.428 | -3.428 |
| C11H10BrN5    | DB00484 | Brimonidine             | -1.924 | -3.425 |
| C23H25N5O5    | DB00590 | Doxazosin               | -1.208 | -3.425 |
| C2H7NS        | DB00847 | Cysteamine              | -0.807 | -3.425 |
| C26H28ClNO    | DB00539 | Toremifene              | -3.403 | -3.424 |
| C13H12F2N6O   | DB00196 | Fluconazole             | -3.42  | -3.42  |
| C21H31N3O5    | DB00722 | Lisinopril              | -3.296 | -3.418 |
| C19H25NO      | DB00504 | Levallorphan            | -1.582 | -3.418 |
| C9H13NO2      | DB00610 | Metaraminol             | -3.403 | -3.414 |
| C25H30N3      | DB00406 | Gentian violet cation   | -1.132 | -3.412 |
| C19H19N3O5S   | DB00713 | Oxacillin               | -3.41  | -3.41  |
| C9H18N2O4     | DB00371 | Meprobamate             | -3.409 | -3.409 |
| C17H21NO3     | DB00749 | Etodolac                | -3.407 | -3.408 |
| C29H33ClN2O2  | DB00836 | Loperamide              | -3.376 | -3.405 |
| C21H25N5O8S2  | DB00948 | Mezlocillin             | -3.402 | -3.402 |
| C9H11N2O5     | DB00249 | Idoxuridine             | -3.387 | -3.401 |
| C3H7O4P       | DB00828 | Fosfomycin              | -3.144 | -3.398 |
| C5H11NO2      | DB00161 | L-Valine                | -3.395 | -3.395 |
| C13H16N2O2    | DB00357 | Aminoglutethimide       | -3.394 | -3.395 |
| C13H14N2O3    | DB00849 | Methylphenobarbital     | -3.306 | -3.394 |
| C8H15NO2      | DB00302 | Tranexamic acid         | -3.393 | -3.393 |
| C19H19NOS     | DB00920 | Ketotifen               | -3.383 | -3.391 |
| C8H6N4O5      | DB00698 | Nitrofurantoin          | -2.109 | -3.39  |
| C18H18O2      | DB00890 | Dienestrol              | -3.386 | -3.386 |
| C20H15F3N4O3  | DB00685 | Trovafloxacin           | -3.34  | -3.386 |
| C21H27NO4     | DB00844 | Nalbuphine              | -1.428 | -3.386 |
| C10H12ClNO2   | DB00181 | Baclofen                | -3.378 | -3.378 |
| C32H47F5O3S   | DB00947 | Fulvestrant             | -3.378 | -3.378 |
| C18H25NO      | DB00514 | Dextromethorphan        | -3.368 | -3.372 |
| C24H28N2O5    | DB00542 | Benazepril              | -3.007 | -3.364 |
| C14H18N2O3    | DB00474 | Methohexital            | -1.951 | -3.363 |
| C21H21NO2S    | DB00799 | Tazarotene              | -3.362 | -3.362 |
| C16H25NO4     | DB00187 | Esmolol                 | -3.36  | -3.362 |
| C22H28O2      | DB00294 | Etonogestrel            | -3.359 | -3.359 |
| C12H18O       | DB00818 | Propofol                | -3.356 | -3.356 |
| C9H13NO       | DB00397 | Phenylpropranolamine    | -0.947 | -3.356 |
| C21H23NO3     | DB00768 | Olopatadine             | -3.354 | -3.354 |
| C9H11N        | DB00752 | Tranlycypromine         | -3.324 | -3.353 |
| C11H16N4O4    | DB00380 | Dexrazoxane             | -1.775 | -3.353 |
| C12H10F3N3O4  | DB00665 | Nilutamide              | -3.351 | -3.352 |
| C11H18N2O3    | DB00312 | Pentobarbital           | -1.659 | -3.347 |

|               |         |                      |        |        |
|---------------|---------|----------------------|--------|--------|
| C12H21NO8S    | DB00273 | Topiramate           | -0.922 | -3.344 |
| C12H14N2O2    | DB00794 | Primidone            | -3.342 | -3.342 |
| C22H22N2O8    | DB00931 | Metacycline          | -2.705 | -3.34  |
| C19H21N5O4    | DB00457 | Prazosin             | -2.097 | -3.339 |
| C10H15NO      | DB00852 | Pseudoephedrine      | -3.315 | -3.322 |
| C20H28N2O5    | DB00584 | Enalapril            | -3.122 | -3.318 |
| C11H11F3N2O3  | DB00499 | Flutamide            | -3.317 | -3.317 |
| C17H20N4S     | DB00334 | Olanzapine           | -1.655 | -3.314 |
| C7H10N2OS     | DB00550 | Propylthiouracil     | -1.645 | -3.314 |
| C17H19N3O3S   | DB00338 | Omeprazole           | -1.602 | -3.313 |
| C21H34NO3     | DB00219 | Oxyphenonium         | -3.31  | -3.31  |
| C23H24N2O4S   | DB00876 | Eprosartan           | -3.272 | -3.304 |
| C20H28N2O5S   | DB00706 | Tamsulosin           | -3.3   | -3.3   |
| C9H11NO3      | DB00135 | Tyrosine             | -3.299 | -3.299 |
| C20H21N7O6S2  | DB00923 | Ceforanide           | -1.384 | -3.293 |
| C19H30N5O10P  | DB00300 | Tenofovir disoproxil | -3.291 | -3.291 |
| C10H16N2O3S   | DB00121 | Biotin               | -3.285 | -3.288 |
| C17H16CIN3O   | DB00543 | Amoxapine            | -3.274 | -3.288 |
| C18H18CIN3O   | DB00408 | Loxapine             | -3.256 | -3.288 |
| C22H24N2O8    | DB00759 | Tetracycline         | -0.956 | -3.285 |
| C14H22N2O3    | DB00335 | Atenolol             | -3.278 | -3.279 |
| C13H12Cl2O4   | DB00903 | Etacrynic acid       | -3.275 | -3.275 |
| C23H29ClFN3O4 | DB00604 | Cisapride            | -2.108 | -3.273 |
| C9H13NO2      | DB00388 | Phenylephrine        | -3.263 | -3.269 |
| C21H24FN3O4   | DB00218 | Moxifloxacin         | -3.168 | -3.269 |
| C12H17N4OS    | DB00152 | Thiamine             | -1.217 | -3.267 |
| C8H15N7O2S3   | DB00927 | Famotidine           | -2.776 | -3.261 |
| C21H26CIN3OS  | DB00850 | Perphenazine         | -1.289 | -3.259 |
| C6H6N4O4      | DB00336 | Nitrofuraf           | -3.258 | -3.258 |
| C16H13CIN2O   | DB00579 | Mazindol             | -0.642 | -3.257 |
| C6H14N4O2     | DB00125 | L-Arginine           | -3.256 | -3.256 |
| C22H29FO4     | DB00324 | Fluorometholone      | -3.256 | -3.256 |
| C22H26N2O2S   | DB00216 | Eletriptan           | -3.25  | -3.252 |
| C9H13NO       | DB00397 | Phenylpropanolamine  | -3.237 | -3.247 |
| C15H11I4NO4   | DB00451 | Levothyroxine        | -2.259 | -3.247 |
| C4H3FN2O2     | DB00544 | Fluorouracil         | -2.499 | -3.242 |
| C11H12N2O2    | DB00754 | Ethotoin             | -3.24  | -3.24  |
| C36H47N5O4    | DB00224 | Indinavir            | -2.598 | -3.24  |
| C19H23N3O4S   | DB00739 | Hetacillin           | -3.233 | -3.237 |
| C14H18N4O3    | DB00440 | Trimethoprim         | -2.6   | -3.232 |
| C19H12O6      | DB00266 | Dicoumarol           | -2.173 | -3.232 |
| C10H20O       | DB00825 | Levomethol           | -3.231 | -3.231 |
| C11H12N4O3S   | DB00664 | Sulfametopyrazine    | -3.115 | -3.228 |
| C21H19N3O3S   | DB00276 | Amsacrine            | -1.179 | -3.225 |
| C12H9N3O      | DB00235 | Milrinone            | -1.159 | -3.224 |
| C8H10N2O3S    | DB00634 | Sulfacetamide        | -1.132 | -3.224 |
| C13H6Cl6O2    | DB00756 | Hexachlorophene      | -3.211 | -3.22  |
| C17H26N2O     | DB00296 | Ropivacaine          | -1.775 | -3.216 |
| C18H24O2      | DB00783 | Estradiol            | -3.215 | -3.215 |
| C19H28O2      | DB00624 | Testosterone         | -3.212 | -3.212 |
| C28H30N2O2    | DB00496 | Darifenacin          | -3.209 | -3.211 |
| C29H39N5O8    | DB00560 | Tigecycline          | -0.559 | -3.211 |
| C18H14N4O5S   | DB00795 | Sulfasalazine        | -2.439 | -3.201 |
| C24H34O3      | DB00896 | Rimexolone           | -3.2   | -3.2   |
| C13H12O2      | DB00600 | Monobenzene          | -3.197 | -3.197 |
| C10H19O6PS2   | DB00772 | Malathion            | -3.194 | -3.194 |
| C17H25N3O5S   | DB00760 | Meropenem            | -3.159 | -3.188 |
| C17H21NO4     | DB00907 | Cocaine              | -1.765 | -3.184 |
| C13H14N2O3    | DB00849 | Methylphenobarbital  | -2.006 | -3.182 |
| C19H27NO      | DB00652 | Pentazocine          | -3.169 | -3.18  |
| C22H26NO3     | DB00771 | Clidinium            | -3.177 | -3.177 |
| C17H19CIN2S   | DB00477 | Chlorpromazine       | -3.176 | -3.177 |
| C11H18N2O3    | DB00312 | Pentobarbital        | -3.141 | -3.176 |

|               |         |                    |        |        |
|---------------|---------|--------------------|--------|--------|
| C14H9CIF3NO2  | DB00625 | Efavirenz          | -3.174 | -3.174 |
| C21H31N5O2    | DB00490 | Buspirone          | -2.839 | -3.169 |
| C12H19NO3     | DB00871 | Terbutaline        | -3.151 | -3.165 |
| C15H13N3O4S   | DB00554 | Piroxicam          | -3.159 | -3.164 |
| C26H28ClNO    | DB00882 | Clomifene          | -3.141 | -3.162 |
| C14H11Cl2NO2  | DB00939 | Meclofenamic acid  | -3.16  | -3.161 |
| C21H25N       | DB00857 | Terbinafine        | -3.038 | -3.159 |
| C17H29GdN4O7  | DB00597 | Gadoteridol        | -0.672 | -3.157 |
| C17H21NO4     | DB00747 | Scopolamine        | -2.446 | -3.156 |
| C11H8O2       | DB00170 | Menadione          | -3.15  | -3.15  |
| C7H15Cl2N2O2P | DB00531 | Cyclophosphamide   | -3.146 | -3.146 |
| C17H16ClN3O   | DB00543 | Amoxapine          | -0.896 | -3.146 |
| C4H6O4        | DB00139 | Succinic acid      | -3.138 | -3.145 |
| C12H21NO8S    | DB00273 | Topiramate         | -3.133 | -3.143 |
| C17H29GdN4O7  | DB00597 | Gadoteridol        | -1.035 | -3.143 |
| C16H13ClN2O2  | DB00349 | Clobazam           | -2.757 | -3.142 |
| C16H14F3N5O   | DB00582 | Voriconazole       | -3.14  | -3.14  |
| C32H45N3O4S   | DB00220 | Nelfinavir         | -3.126 | -3.14  |
| C5H11NO4S     | DB00659 | Acamprosate        | -3.137 | -3.137 |
| C4H6N4O3S2    | DB00819 | Acetazolamide      | -1.716 | -3.134 |
| C15H12N2O2    | DB00252 | Phenytoin          | -1.612 | -3.133 |
| C52H98N16O13  | DB00803 | Colistin           | -0.709 | -3.132 |
| C20H24ClN3S   | DB00433 | Prochlorperazine   | -0.787 | -3.131 |
| C16H13ClN2O2  | DB00231 | Temazepam          | -3.129 | -3.129 |
| C4H3FN2O2     | DB00544 | Fluorouracil       | -2.927 | -3.127 |
| C15H23N3O4S   | DB00391 | Sulpiride          | -3.126 | -3.126 |
| CH3O5P        | DB00529 | Foscarnet          | -0.436 | -3.124 |
| C19H24N2O     | DB00377 | Palonosetron       | -3.122 | -3.123 |
| C15H15NO2     | DB00784 | Mefenamic acid     | -3.121 | -3.121 |
| C14H22N2O     | DB00281 | Lidocaine          | -3.1   | -3.121 |
| C17H16F6N2O   | DB00358 | Mefloquine         | -3.116 | -3.119 |
| C8H8F3N3O4S2  | DB00774 | Hydroflumethiazide | -3.068 | -3.114 |
| C20H26N4O     | DB00589 | Lisuride           | -2.674 | -3.112 |
| C12H15N3O2S   | DB00518 | Albendazole        | -1.695 | -3.109 |
| C28H27NO4S    | DB00481 | Raloxifene         | -0.646 | -3.108 |
| C16H16N2O6S2  | DB00456 | Cefalotin          | -3.107 | -3.107 |
| C18H19N3O6S   | DB00689 | Cephaloglycin      | -2.471 | -3.103 |
| C3H4O3        | DB00119 | Pyruvic acid       | -3.1   | -3.1   |
| C16H15F2N3O4S | DB00213 | Pantoprazole       | -1.013 | -3.099 |
| C6H5NO2       | DB00627 | Niacin             | -0.65  | -3.098 |
| C29H38N4O10   | DB00256 | Lymecycline        | -2.935 | -3.097 |
| C22H23ClN6O   | DB00678 | Losartan           | -3.095 | -3.095 |
| C6H7N3O       | DB00951 | Isoniazid          | -3.092 | -3.092 |
| C7H11NO3      | DB00617 | Paramethadione     | -3.091 | -3.091 |
| C23H21F7N4O3  | DB00673 | Aprepitant         | -3.087 | -3.087 |
| C19H29NO5     | DB00449 | Dipivefrin         | -0.422 | -3.084 |
| C19H22ClN5O   | DB00656 | Trazodone          | -2.665 | -3.083 |
| C43H66O14     | DB00511 | Acetyldigitoxin    | -3.081 | -3.081 |
| C21H24FN3O4   | DB00218 | Moxifloxacin       | -1.982 | -3.08  |
| C13H18N4O3    | DB00806 | Pentoxifylline     | -3.079 | -3.079 |
| C10H15NO      | DB00852 | Pseudoephedrine    | -0.412 | -3.074 |
| C46H56N4O10   | DB00541 | Vincristine        | -1.974 | -3.068 |
| C19H21N3O5    | DB00270 | Isradipine         | -3.067 | -3.067 |
| C11H13N3O3S   | DB00263 | Sulfisoxazole      | -3.066 | -3.066 |
| C22H28N2O2    | DB00913 | Anileridine        | -1.054 | -3.065 |
| C28H35FO7     | DB00288 | Amcinonide         | -3.063 | -3.063 |
| C6H9NO3       | DB00347 | Trimethadione      | -3.057 | -3.057 |
| C2H7NS        | DB00847 | Cysteamine         | -3.035 | -3.057 |
| C17H18FN3O3   | DB00537 | Ciprofloxacin      | -1.952 | -3.057 |
| C8H10N2O3S    | DB00634 | Sulfacetamide      | -3.035 | -3.053 |
| C22H24ClFN4O3 | DB00317 | Gefitinib          | -2.631 | -3.046 |
| C7H11NO2      | DB00593 | Ethosuximide       | -3.045 | -3.045 |
| C19H16O4      | DB00682 | Warfarin           | -3.025 | -3.045 |



|              |         |                             |        |        |
|--------------|---------|-----------------------------|--------|--------|
| C46H56N4O10  | DB00541 | Vincristine                 | -1.339 | -3.041 |
| C19H17NO7    | DB00716 | Nedocromil                  | -3.038 | -3.038 |
| C6H13NO2     | DB00513 | Aminocaproic Acid           | -3.034 | -3.034 |
| C14H21N3O2S  | DB00669 | Sumatriptan                 | -3.026 | -3.03  |
| C10H16N2O3   | DB00237 | Butabarbital                | -1.35  | -3.03  |
| C20H23NO4    | DB00704 | Naltrexone                  | -2.974 | -3.022 |
| C20H22N8O5   | DB00563 | Methotrexate                | -0.557 | -3.018 |
| C11H9I3N2O4  | DB00271 | Diatrizoate                 | -3.014 | -3.014 |
| C28H37ClO7   | DB00394 | Beclomethasone dipropionate | -3.014 | -3.014 |
| C8H15N7O2S3  | DB00927 | Famotidine                  | -1.713 | -3.012 |
| C8H12N2      | DB00780 | Phenelzine                  | -2.002 | -3.009 |
| C22H28ClFO4  | DB00838 | Clocortolone                | -3.006 | -3.006 |
| C33H34N6O6   | DB00796 | Candesartan cilexetil       | -2.846 | -3.002 |
| C16H16ClN3O4 | DB00447 | Loracarbef                  | -2.449 | -3.001 |
| C19H21N3O    | DB00425 | Zolpidem                    | -2.656 | -3     |
| C11H16N2O3   | DB00306 | Talbutal                    | -1.557 | -2.998 |
| C17H20FN3O3  | DB00487 | Pefloxacin                  | -0.534 | -2.992 |
| C27H44O2     | DB00146 | Calcifediol                 | -2.989 | -2.989 |
| C22H22FN3O2  | DB00450 | Droperidol                  | -2.89  | -2.988 |
| C20H25N3O2   | DB00353 | Methylethylmetrine          | -2.357 | -2.985 |
| C10H15N5     | DB00914 | Phenformin                  | -0.449 | -2.985 |
| C15H14O3     | DB00573 | Fenoprofen                  | -2.981 | -2.981 |
| C28H44O      | DB00153 | Ergocalciferol              | -2.98  | -2.98  |
| C14H12N6O    | DB00922 | Levosimendan                | -2.897 | -2.978 |
| C20H26N4O    | DB00589 | Lisuride                    | -2.587 | -2.971 |
| C16H13N3O3   | DB00643 | Mebendazole                 | -2.306 | -2.965 |
| C17H20N2O5S  | DB00887 | Bumetanide                  | -2.962 | -2.962 |
| C23H25F3N2OS | DB00875 | Flupentixol                 | -2.152 | -2.961 |
| C16H19N3O4S  | DB00415 | Ampicillin                  | -2.733 | -2.96  |
| C15H12I3NO4  | DB00279 | Liothyronine                | -1.868 | -2.959 |
| C17H29GdN4O7 | DB00597 | Gadoteridol                 | -2.926 | -2.957 |
| C14H18N4O3   | DB00440 | Trimethoprim                | -2.486 | -2.956 |
| C30H53NO11   | DB00868 | Benzonatate                 | -2.954 | -2.954 |
| C15H11I4NO4  | DB00509 | Dextrothyroxine             | -2.827 | -2.951 |
| C27H34N2O7   | DB00691 | Moexipril                   | -2.795 | -2.949 |
| C5H9N3       | DB00272 | Betazole                    | -2.538 | -2.948 |
| C19H27NO3    | DB00731 | Nateglinide                 | -2.946 | -2.946 |
| C21H19N3O3S  | DB00276 | Amsacrine                   | -2.926 | -2.945 |
| C20H22ClN3O  | DB00613 | Amodiaquine                 | -2.65  | -2.941 |
| C7H6ClN3O4S2 | DB00880 | Chlorothiazide              | -2.621 | -2.935 |
| C22H25N3O4S  | DB00680 | Moricizine                  | -1.391 | -2.93  |
| C18H18ClN3O  | DB00408 | Loxapine                    | -1.182 | -2.929 |
| C24H34N2O5   | DB00519 | Trandolapril                | -2.195 | -2.923 |
| C15H14N4O    | DB00238 | Nevirapine                  | -2.921 | -2.921 |
| C8H10N4O2    | DB00824 | Enprofylline                | -0.27  | -2.92  |
| C7H6ClN3O4S2 | DB00880 | Chlorothiazide              | -2.381 | -2.915 |
| C33H35N5O5   | DB00696 | Ergotamine                  | -2.05  | -2.915 |
| C13H20N2O2   | DB00721 | Procaine                    | -2.892 | -2.913 |
| C7H4ClNO2    | DB00356 | Chlorzoxazone               | -1.188 | -2.91  |
| C20H22N2     | DB00719 | Azatadine                   | -2.905 | -2.909 |
| C37H67NO13   | DB00199 | Erythromycin                | -2.902 | -2.908 |
| C9H7Cl2N5    | DB00555 | Lamotrigine                 | -2.876 | -2.905 |
| C15H11I4NO4  | DB00451 | Levothyroxine               | -2.777 | -2.901 |
| C14H11Cl2NO2 | DB00586 | Diclofenac                  | -2.898 | -2.899 |
| C21H26ClN3OS | DB00850 | Perphenazine                | -2.555 | -2.891 |
| C10H7Cl2N3O  | DB00261 | Anagrelide                  | -2.888 | -2.888 |
| C10H15N5     | DB00914 | Phenformin                  | -2.87  | -2.887 |
| C22H26F3N3OS | DB00623 | Fluphenazine                | -0.915 | -2.885 |
| C10H13NO3    | DB00765 | Metyrosine                  | -2.881 | -2.881 |
| C20H24N2O2   | DB00908 | Quinidine                   | -2.866 | -2.881 |
| C13H20N2O    | DB00750 | Prilocaine                  | -1.51  | -2.881 |
| C18H13Cl4N3O | DB00239 | Oxiconazole                 | -1.84  | -2.878 |
| C22H28Cl2O4  | DB00764 | Mometasone                  | -2.876 | -2.876 |

|                |         |                    |        |        |
|----------------|---------|--------------------|--------|--------|
| C8H12N2        | DB00780 | Phenelzine         | -2.094 | -2.874 |
| C10H16Br2N2O2  | DB00236 | Pipobroman         | -2.872 | -2.872 |
| C19H27N3O5S2   | DB00204 | Dofetilide         | -1.324 | -2.872 |
| C9H11Cl2N3O4S2 | DB00232 | Methyclothiazide   | -2.87  | -2.87  |
| C16H26N2O3     | DB00807 | Proparacaine       | -2.849 | -2.868 |
| C21H25CIN2O3   | DB00341 | Cetirizine         | -1.009 | -2.868 |
| C28H28O3       | DB00210 | Adapalene          | -2.867 | -2.867 |
| C21H29NO2      | DB00611 | Butorphanol        | -2.856 | -2.867 |
| C22H28N6O3S    | DB00705 | Delavirdine        | -2.702 | -2.863 |
| C21H21CIN2O8   | DB00618 | Demeclocycline     | -0.348 | -2.861 |
| C17H19N3       | DB00370 | Mirtazapine        | -1.594 | -2.857 |
| C18H13CIFN3    | DB00683 | Midazolam          | -2.64  | -2.851 |
| C25H30N2O5     | DB00881 | Quinapril          | -1.974 | -2.848 |
| C29H33CIN2O2   | DB00836 | Loperamide         | -1.057 | -2.847 |
| C19H27NO       | DB00652 | Pentazocine        | -0.507 | -2.847 |
| C32H26N4O2     | DB00872 | Conivaptan         | -1.927 | -2.841 |
| C16H14N2O3S    | DB00580 | Valdecoxib         | -2.839 | -2.839 |
| C14H12N6O      | DB00922 | Levosimendan       | -1.617 | -2.838 |
| C18H28N2O      | DB00297 | Bupivacaine        | -1.396 | -2.837 |
| C29H35NO2      | DB00834 | Mifepristone       | -0.683 | -2.837 |
| C53H72N2O12    | DB00565 | Cisatracurium      | -2.836 | -2.836 |
| C19H17CIFN3O5S | DB00301 | Flucloxacillin     | -2.836 | -2.836 |
| C26H40O5       | DB00654 | Latanoprost        | -2.836 | -2.836 |
| C19H21N5O2     | DB00670 | Pirenzepine        | -2.55  | -2.835 |
| C18H22CINO     | DB00925 | Phenoxybenzamine   | -2.46  | -2.834 |
| C21H27NO       | DB00333 | Methadone          | -2.823 | -2.826 |
| C4H10N2        | DB00592 | Piperazine         | -2.81  | -2.823 |
| C10H8N6O       | DB00885 | Pemirolast         | -2.821 | -2.822 |
| C21H23CIFNO2   | DB00502 | Haloperidol        | -0.57  | -2.822 |
| C22H23N3O4     | DB00530 | Erlotinib          | -2.82  | -2.82  |
| C19H12O6       | DB00266 | Dicoumarol         | -2.697 | -2.811 |
| C6H9N3O2       | DB00117 | Histidine          | -2.376 | -2.811 |
| C24H32O4S      | DB00421 | Spirolactone       | -2.81  | -2.81  |
| C8H10N2S       | DB00609 | Ethionamide        | -2.81  | -2.81  |
| C23H25F3N2OS   | DB00875 | Flupentixol        | -1.289 | -2.81  |
| C17H19NO3      | DB00295 | Morphine           | -1.32  | -2.807 |
| C14H10Cl4      | DB00648 | Mitotane           | -2.804 | -2.804 |
| C55H75N17O13   | DB00644 | Gonadorelin        | -1.976 | -2.803 |
| C16H19CIN2O    | DB00748 | Carbinoxamine      | -2.796 | -2.802 |
| C27H36N2O4     | DB00912 | Repaglinide        | -2.786 | -2.795 |
| C16H13CIN2O2   | DB00349 | Clobazam           | -2.357 | -2.794 |
| C21H25CIN2O3   | DB00341 | Cetirizine         | -2.382 | -2.793 |
| C20H24N2O2     | DB00468 | Quinine            | -0.516 | -2.793 |
| C18H22O2       | DB00655 | Estrone            | -2.792 | -2.792 |
| C6H9N3O3       | DB00916 | Metronidazole      | -2.79  | -2.79  |
| C16H13CIN2O    | DB00579 | Mazindol           | -2.78  | -2.788 |
| C19H24O3       | DB00894 | Testolactone       | -2.778 | -2.778 |
| C22H26N2O4S    | DB00343 | Diltiazem          | -2.76  | -2.778 |
| C12H8O4        | DB00553 | Methoxsalen        | -2.775 | -2.775 |
| C33H37N5O5     | DB00320 | Dihydroergotamine  | -1.045 | -2.772 |
| C16H19BrN2     | DB00835 | Brompheniramine    | -2.769 | -2.769 |
| C23H32N6O4S    | DB00862 | Vardenafil         | -1.996 | -2.767 |
| C11H16N2O3     | DB00306 | Talbutal           | -2.712 | -2.766 |
| C16H19BrN2     | DB00405 | Dexbrompheniramine | -2.765 | -2.765 |
| C27H34N2O7     | DB00691 | Moexipril          | -1.885 | -2.759 |
| C19H32N2O5     | DB00790 | Perindopril        | -2.135 | -2.758 |
| C10H17N3S      | DB00413 | Pramipexole        | -2.753 | -2.753 |
| C6H8N2O2S      | DB00259 | Sulfanilamide      | -2.752 | -2.752 |
| C24H30N2O2     | DB00561 | Doxapram           | -2.4   | -2.749 |
| C14H12O3S      | DB00870 | Suprofen           | -2.748 | -2.748 |
| C20H30O        | DB00162 | Vitamin A          | -2.748 | -2.748 |
| C30H46NO7P     | DB00492 | Fosinopril         | -2.747 | -2.747 |
| C19H16CINO4    | DB00328 | Indometacin        | -2.746 | -2.746 |

|               |         |                   |        |        |
|---------------|---------|-------------------|--------|--------|
| C11H18N2O2S   | DB00599 | Thiopental        | -2.719 | -2.746 |
| C17H28N2O3    | DB00892 | Oxybuprocaine     | -2.722 | -2.743 |
| C10H16N2O4S3  | DB00869 | Dorzolamide       | -2.675 | -2.739 |
| C15H13FO2     | DB00712 | Flurbiprofen      | -2.736 | -2.736 |
| C11H18N2O2S   | DB00599 | Thiopental        | -0.474 | -2.736 |
| C8H11Cl2N3O2  | DB00791 | Uracil mustard    | -2.711 | -2.734 |
| C16H26N2O3    | DB00807 | Proparacaine      | -0.695 | -2.734 |
| C18H16O3      | DB00946 | Phenprocoumon     | -1.231 | -2.732 |
| C19H25NO      | DB00504 | Levallorphan      | -2.701 | -2.728 |
| C20H28O2      | DB00523 | Alitretinoin      | -2.717 | -2.722 |
| C8H9NO2       | DB00316 | Acetaminophen     | -2.72  | -2.72  |
| C14H11NO5     | DB00323 | Tolcapone         | -2.66  | -2.715 |
| C17H19NO3     | DB00327 | Hydromorphone     | -2.658 | -2.709 |
| C11H17NO      | DB00379 | Mexiletine        | -2.703 | -2.708 |
| C18H26ClN3    | DB00608 | Chloroquine       | -2.664 | -2.7   |
| C20H21FN2O    | DB00215 | Citalopram        | -2.696 | -2.698 |
| C25H30N2O5    | DB00881 | Quinapril         | -2.543 | -2.697 |
| C20H26O2      | DB00717 | Norethisterone    | -2.685 | -2.685 |
| C25H35N3O6S   | DB00701 | Amprenavir        | -2.685 | -2.685 |
| C17H18FN3O3   | DB00537 | Ciprofloxacin     | -2.586 | -2.685 |
| C19H20N2O2    | DB00812 | Phenylbutazone    | -0.086 | -2.685 |
| C12H21N5O2S2  | DB00585 | Nizatidine        | -2.683 | -2.683 |
| C16H16ClNO2S  | DB00758 | Clopidogrel       | -0.734 | -2.683 |
| MgO4S         | DB00653 | Magnesium sulfate | -2.681 | -2.681 |
| C21H29N3O     | DB00280 | Disopyramide      | -2.676 | -2.681 |
| C9H16O4       | DB00548 | Azelaic acid      | -0.083 | -2.681 |
| C18H19N3O3S   | DB00412 | Rosiglitazone     | -1.341 | -2.676 |
| C5H8N4O3S2    | DB00703 | Methazolamide     | -1.465 | -2.675 |
| C16H15N3      | DB00751 | Epinastine        | -1.029 | -2.673 |
| C9H4Cl3IO     | DB00793 | Haloprogin        | -2.672 | -2.672 |
| C7H10N2O2S    | DB00389 | Carbimazole       | -2.671 | -2.671 |
| C7H10N2OS     | DB00550 | Propylthiouracil  | -2.632 | -2.67  |
| C26H28N2      | DB00568 | Cinnarizine       | -1.446 | -2.667 |
| C38H72N2O12   | DB00207 | Azithromycin      | -0.017 | -2.662 |
| C9H10N4O2S2   | DB00576 | Sulfamethizole    | -2.644 | -2.661 |
| C23H29ClFN3O4 | DB00604 | Cisapride         | -2.571 | -2.661 |
| C6H5NO2       | DB00627 | Niacin            | -2.649 | -2.659 |
| C11H15NO      | DB00830 | Phenmetrazine     | 0.073  | -2.654 |
| C17H14O4S     | DB00533 | Rofecoxib         | -2.652 | -2.652 |
| C26H28ClNO    | DB00539 | Toremifene        | -0.634 | -2.647 |
| C27H22Cl2N4   | DB00845 | Clofazimine       | -2.644 | -2.646 |
| C24H30N2O2    | DB00561 | Doxapram          | -2.163 | -2.643 |
| C16H24N2O     | DB00935 | Oxymetazoline     | -2.641 | -2.641 |
| C17H22N2O     | DB00366 | Doxylamine        | -2.637 | -2.64  |
| C12H16F3N     | DB00574 | Fenfluramine      | -2.63  | -2.63  |
| C8H10N4O2     | DB00201 | Caffeine          | -2.629 | -2.629 |
| C18H16O3      | DB00946 | Phenprocoumon     | -2.58  | -2.629 |
| C16H15F2N3O4S | DB00213 | Pantoprazole      | -1.921 | -2.628 |
| C18H19NOS     | DB00476 | Duloxetine        | -2.625 | -2.626 |
| C13H11N3O4S2  | DB00469 | Tenoxicam         | -2.619 | -2.621 |
| C14H16N4      | DB00724 | Imiquimod         | -2.277 | -2.62  |
| C16H28N2O4    | DB00198 | Oseltamivir       | -2.536 | -2.618 |
| C16H16ClN3O4  | DB00447 | Loracarbef        | -2.32  | -2.617 |
| C11H11NO2     | DB00832 | Phensuximide      | -2.612 | -2.612 |
| C17H18N2O6S   | DB00578 | Carbenicillin     | -2.609 | -2.609 |
| C14H14ClNS    | DB00208 | Ticlopidine       | -2.434 | -2.608 |
| C20H24N2O2    | DB00468 | Quinine           | -2.587 | -2.602 |
| C13H16N2      | DB00633 | Dexmedetomidine   | -1.878 | -2.597 |
| C29H31N7O     | DB00619 | Imatinib          | -1.84  | -2.594 |
| C15H11ClN2O2  | DB00842 | Oxazepam          | -2.591 | -2.591 |
| C9H8ClN5S     | DB00697 | Tizanidine        | -2.426 | -2.591 |
| C16H13N3O3    | DB00643 | Mebendazole       | -1.902 | -2.585 |
| C27H36N2O4    | DB00912 | Repaglinide       | -0.043 | -2.582 |

|                |         |                      |        |        |
|----------------|---------|----------------------|--------|--------|
| C19H20N2O3     | DB00757 | Dolasetron           | -1.662 | -2.581 |
| C19H23NO3      | DB00234 | Reboxetine           | -2.545 | -2.579 |
| C12H13CIN4     | DB00205 | Pyrimethamine        | -2.099 | -2.577 |
| C21H26NO3      | DB00940 | Methantheleine       | -2.572 | -2.572 |
| C24H28O2       | DB00307 | Bexarotene           | -2.568 | -2.569 |
| C16H28N2O4     | DB00198 | Oseltamivir          | -1.353 | -2.565 |
| C20H28N2O3     | DB00383 | Oxyphencyclimine     | -2.563 | -2.563 |
| C20H28O2       | DB00755 | Tretinoin            | -2.558 | -2.563 |
| C19H21N        | DB00344 | Protriptyline        | -2.561 | -2.561 |
| C15H21F3N2O2   | DB00176 | Fluvoxamine          | -2.557 | -2.56  |
| C21H21N        | DB00434 | Cyproheptadine       | -0.085 | -2.56  |
| C5H11NO2S      | DB00859 | Penicillamine        | -2.544 | -2.558 |
| C6H14FO3P      | DB00677 | Isoflurophate        | -2.554 | -2.554 |
| C23H25N5O5     | DB00590 | Doxazosin            | -2.424 | -2.554 |
| C5H12N2O2      | DB00129 | Ornithine            | -2.553 | -2.553 |
| C15H14CIN3O4S  | DB00833 | Cefaclor             | -1.881 | -2.549 |
| C16H14F3N3O2S  | DB00448 | Lansoprazole         | -0.513 | -2.546 |
| C22H28N6O3S    | DB00705 | Delavirdine          | -1.669 | -2.54  |
| C19H30O3       | DB00621 | Oxandrolone          | -2.537 | -2.537 |
| C16H25NO2      | DB00193 | Tramadol             | -2.533 | -2.535 |
| C19H21N5O2     | DB00670 | Pirenzepine          | -1.893 | -2.534 |
| C19H16O4       | DB00682 | Warfarin             | -0.534 | -2.532 |
| C15H12N2O2     | DB00252 | Phenytoin            | -2.16  | -2.525 |
| C17H21NO       | DB00289 | Atomoxetine          | -2.52  | -2.52  |
| C14H16N2O2     | DB00292 | Etomidate            | -0.139 | -2.52  |
| C7H9ClO        | DB00189 | Ethchlorvynol        | -2.518 | -2.518 |
| C16H13CIN2O    | DB00829 | Diazepam             | -2.513 | -2.513 |
| C22H25N3O4S    | DB00680 | Moricizine           | -1.349 | -2.507 |
| C29H31N7O      | DB00619 | Imatinib             | -0.003 | -2.507 |
| C12H14N2O2     | DB00532 | Mephenytoin          | -2.501 | -2.501 |
| C15H14CIN3O4S3 | DB00562 | Benzthiazide         | -2.197 | -2.5   |
| C20H29N3O2     | DB00527 | Cinchocaine          | -2.495 | -2.499 |
| C8H12N2        | DB00780 | Phenelzine           | -2.143 | -2.498 |
| C41H42N4O8     | DB00460 | Verteporfin          | -2.496 | -2.497 |
| C22H30N6O4S    | DB00203 | Sildenafil           | -2.314 | -2.496 |
| C15H10O2       | DB00498 | Phenindione          | -2.493 | -2.494 |
| C19H27N5       | DB00298 | Dapiprazole          | -1.621 | -2.491 |
| C24H28N2O5     | DB00542 | Benazepril           | -2.019 | -2.489 |
| C10H21N3O      | DB00711 | Diethylcarbamazine   | -2.013 | -2.489 |
| C24H32O4       | DB00823 | Ethynodiol diacetate | -2.488 | -2.488 |
| C4H10N2        | DB00592 | Piperazine           | -0.136 | -2.482 |
| C46H58N4O9     | DB00570 | Vinblastine          | -0.456 | -2.481 |
| C6H6Cl6        | DB00431 | Lindane              | -2.479 | -2.479 |
| C14H22N2O      | DB00281 | Lidocaine            | -0.477 | -2.478 |
| C10H17NOS      | DB00185 | Cevimeline           | -2.476 | -2.477 |
| C27H44O3       | DB00136 | Calcitriol           | -2.475 | -2.475 |
| C10H14N2       | DB00184 | Nicotine             | -2.448 | -2.473 |
| C18H19CIN4     | DB00363 | Clozapine            | -0.602 | -2.471 |
| C21H29NO2      | DB00611 | Butorphanol          | -0.085 | -2.464 |
| C16H11CIN2O3   | DB00628 | Clorazepic acid      | -2.462 | -2.462 |
| C8H8F3N3O4S2   | DB00774 | Hydroflumethiazide   | -0.85  | -2.46  |
| C24H30O6       | DB00700 | Eplerenone           | -2.455 | -2.455 |
| C4H6N4O3S2     | DB00819 | Acetazolamide        | -1.11  | -2.455 |
| C21H21N        | DB00434 | Cyproheptadine       | -2.441 | -2.451 |
| C8H16O2        | DB00313 | Valproic Acid        | -2.448 | -2.45  |
| C16H19N3O4S    | DB00415 | Ampicillin           | -1.77  | -2.447 |
| C26H29NO       | DB00675 | Tamoxifen            | -0.433 | -2.446 |
| C21H16ClF3N4O3 | DB00398 | Sorafenib            | -0.127 | -2.44  |
| C21H22N2O5S    | DB00607 | Nafcillin            | -2.438 | -2.438 |
| C24H26BrN3O3   | DB00699 | Nicergoline          | -0.855 | -2.436 |
| C8H13N3O4S     | DB00911 | Tinidazole           | -2.435 | -2.435 |
| C14H19NO2      | DB00422 | Methylphenidate      | -2.431 | -2.432 |
| C18H21NO4      | DB00497 | Oxycodone            | -2.334 | -2.431 |

|                |         |                           |        |        |
|----------------|---------|---------------------------|--------|--------|
| C4H6N4O3S2     | DB00819 | Acetazolamide             | -0.29  | -2.429 |
| C28H33CIN2     | DB00354 | Buclizine                 | -2.233 | -2.427 |
| C33H40N2O9     | DB00206 | Reserpine                 | -2.384 | -2.421 |
| C19H20N2O2     | DB00812 | Phenylbutazone            | -2.408 | -2.415 |
| C16H13N3O3     | DB00643 | Mebendazole               | -1.801 | -2.415 |
| C14H12O2       | DB00676 | Benzyl benzoate           | -2.41  | -2.41  |
| C24H34N4O5S    | DB00222 | Glimepiride               | -2.386 | -2.41  |
| C4H6N4O3S2     | DB00819 | Acetazolamide             | -2.156 | -2.41  |
| C13H19NO       | DB00937 | Diethylpropion            | -1.503 | -2.409 |
| C3H2CIF5O      | DB00753 | Isoflurane                | -2.404 | -2.404 |
| C20H34O5       | DB00770 | Alprostadil               | -2.396 | -2.4   |
| C22H23CIN2O2   | DB00455 | Loratadine                | -2.374 | -2.4   |
| C15H15NO3      | DB00500 | Tolmetin                  | -2.396 | -2.397 |
| C17H19N3       | DB00370 | Mirtazapine               | -2.307 | -2.395 |
| C9H16O4        | DB00548 | Azelaic acid              | -2.386 | -2.394 |
| C22H24N2O8     | DB00759 | Tetracycline              | 0.006  | -2.394 |
| C13H20N2O      | DB00750 | Prilocaine                | -2.332 | -2.393 |
| C21H16CIF3N4O3 | DB00398 | Sorafenib                 | -2.38  | -2.392 |
| C22H30O        | DB00304 | Desogestrel               | -2.386 | -2.386 |
| C31H33N3O6S    | DB00549 | Zafirlukast               | -2.372 | -2.379 |
| C19H29NO       | DB00387 | Procyclidine              | -2.375 | -2.376 |
| C29H31N7O      | DB00619 | Imatinib                  | -2.169 | -2.376 |
| C19H27N5       | DB00298 | Dapiprazole               | -2.074 | -2.374 |
| C17H12Cl2N4    | DB00897 | Triazolam                 | -2.369 | -2.371 |
| C37H67NO13     | DB00199 | Erythromycin              | 0.277  | -2.367 |
| C16H17N5O7S2   | DB00493 | Cefotaxime                | -2.364 | -2.364 |
| C3H2CIF5O      | DB00228 | Enflurane                 | -2.35  | -2.35  |
| C26H31Cl2N5O3  | DB00251 | Terconazole               | -2.103 | -2.35  |
| C33H37N5O5     | DB00320 | Dihydroergotamine         | -2.295 | -2.345 |
| C19H17Cl3N2S   | DB00639 | Butoconazole              | -1.964 | -2.343 |
| C21H25N        | DB00857 | Terbinafine               | -1.342 | -2.342 |
| C33H34N6O6     | DB00796 | Candesartan cilexetil     | -1.474 | -2.34  |
| C24H36O5       | DB00227 | Lovastatin                | -2.339 | -2.339 |
| C19H27N5       | DB00298 | Dapiprazole               | -1.278 | -2.338 |
| C15H21NO2      | DB00454 | Meperidine                | -2.314 | -2.329 |
| C14H14CINS     | DB00208 | Ticlopidine               | -1.519 | -2.329 |
| C14H18N4O3     | DB00440 | Trimethoprim              | -1.378 | -2.322 |
| C22H28N2O      | DB00813 | Fentanyl                  | -0.21  | -2.318 |
| C14H29NaO4S    | DB00464 | Sodium Tetradecyl Sulfate | -2.316 | -2.316 |
| C28H33CIN2     | DB00354 | Buclizine                 | -1.499 | -2.314 |
| C22H30N6O4S    | DB00203 | Sildenafil                | -1.495 | -2.314 |
| C17H27NO2      | DB00285 | Venlafaxine               | -2.312 | -2.313 |
| C14H19Cl2NO2   | DB00291 | Chlorambucil              | -2.303 | -2.305 |
| C19H17Cl2N3O5S | DB00485 | Dicloxacillin             | -2.303 | -2.303 |
| C19H22CIN5O    | DB00656 | Trazodone                 | -1.896 | -2.299 |
| C21H23CIFN3O   | DB00690 | Flurazepam                | 0      | -2.297 |
| C16H20N4O3S    | DB00214 | Torsemide                 | -1.875 | -2.285 |
| C18H21NO3      | DB00956 | Hydrocodone               | -2.252 | -2.282 |
| C14H16N2O2     | DB00292 | Etomidate                 | -2.27  | -2.281 |
| C36H41N3O6     | DB00528 | Lercanidipine             | -0.491 | -2.278 |
| C23H32N6O4S    | DB00862 | Vardenafil                | -1.409 | -2.274 |
| C22H28N2O2     | DB00913 | Anileridine               | -2.251 | -2.272 |
| C24H32O4       | DB00351 | Megestrol acetate         | -2.264 | -2.264 |
| C15H25NO3      | DB00264 | Metoprolol                | -2.262 | -2.264 |
| C45H54N4O8     | DB00361 | Vinorelbine               | -2.12  | -2.262 |
| C21H28O2       | DB00378 | Dydrogesterone            | -2.26  | -2.26  |
| C4H6N4O3S2     | DB00819 | Acetazolamide             | -1.038 | -2.26  |
| C21H21CIN4OS   | DB00246 | Ziprasidone               | -1.583 | -2.253 |
| C14H13N3O4S2   | DB00814 | Meloxicam                 | -2.232 | -2.248 |
| C18H13CIFN3    | DB00683 | Midazolam                 | -1.535 | -2.248 |
| C36H42N2       | DB00941 | Hexafluoronium            | -2.241 | -2.241 |
| C22H29N3S2     | DB00372 | Thiethylperazine          | -1.954 | -2.235 |
| C24H26BrN3O3   | DB00699 | Nicergoline               | -2.188 | -2.231 |

|                |         |                       |        |        |
|----------------|---------|-----------------------|--------|--------|
| C16H16ClNO2S   | DB00758 | Clopidogrel           | -2.197 | -2.22  |
| C10H10N4O2S    | DB00359 | Sulfadiazine          | -1.348 | -2.217 |
| C14H16ClN3O4S2 | DB00606 | Cyclothiazide         | 0.087  | -2.217 |
| C22H26F3N3OS   | DB00623 | Fluphenazine          | -1.665 | -2.213 |
| C13H17NO       | DB00265 | Crotamiton            | -2.211 | -2.211 |
| C9H11N         | DB00752 | Tranlycypromine       | -0.402 | -2.211 |
| C19H27N3O5S2   | DB00204 | Dofetilide            | -0.168 | -2.211 |
| C15H21NO2      | DB00454 | Meperidine            | -0.018 | -2.211 |
| C20H24N2O2     | DB00908 | Quinidine             | 0.069  | -2.208 |
| C12H9N3O5S     | DB00507 | Nitazoxanide          | -2.189 | -2.204 |
| C18H19N3O3S    | DB00412 | Rosiglitazone         | -1.625 | -2.191 |
| C4H6CaO4       | DB00258 | Calcium acetate       | -2.186 | -2.189 |
| C13H16N2       | DB00633 | Dexmedetomidine       | -1.699 | -2.188 |
| C23H27FN4O2    | DB00734 | Risperidone           | 0.234  | -2.188 |
| C18H28N2O      | DB00297 | Bupivacaine           | -2.131 | -2.186 |
| C18H19N3O      | DB00904 | Ondansetron           | -1.198 | -2.182 |
| C23H27FN4O2    | DB00734 | Risperidone           | -2.169 | -2.179 |
| C10H7N3S       | DB00730 | Thiabendazole         | -2.177 | -2.178 |
| C23H32N6O4S    | DB00862 | Vardenafil            | -0.512 | -2.178 |
| C22H17ClN2     | DB00257 | Clotrimazole          | -1.774 | -2.172 |
| C23H32N6O4S    | DB00862 | Vardenafil            | 0.549  | -2.168 |
| C17H22N4O      | DB00805 | Minaprine             | -0.98  | -2.164 |
| C19H21N5O2     | DB00670 | Pirenzepine           | -0.291 | -2.162 |
| C23H30NO3      | DB00782 | Propantheline         | -2.161 | -2.161 |
| C19H21N5O4     | DB00457 | Prazosin              | -2.068 | -2.16  |
| C22H23ClN2O2   | DB00455 | Loratadine            | -0.29  | -2.16  |
| C27H38N2O4     | DB00661 | Verapamil             | -2.145 | -2.15  |
| C33H40N2O9     | DB00206 | Reserpine             | -0.467 | -2.141 |
| C17H13ClN4     | DB00404 | Alprazolam            | -2.138 | -2.14  |
| C20H25NO2S2    | DB00906 | Tiagabine             | -2.138 | -2.138 |
| C13H20N2O2     | DB00721 | Procaine              | -0.148 | -2.135 |
| C12H15NO3      | DB00660 | Metaxalone            | -2.12  | -2.12  |
| C13H14N2       | DB00382 | Tacrine               | -2.119 | -2.12  |
| C25H30N3       | DB00406 | Gentian violet cation | -2.101 | -2.114 |
| C22H24N2O8     | DB00254 | Doxycycline           | 0.409  | -2.113 |
| C17H12ClF3N2O  | DB00801 | Halazepam             | -2.112 | -2.112 |
| C5H14NO        | DB00122 | Choline               | -2.11  | -2.11  |
| C26H28ClNO     | DB00882 | Clomifene             | -0.097 | -2.11  |
| C27H44O        | DB00169 | Cholecalciferol       | -2.109 | -2.109 |
| C12H15N3O2S    | DB00518 | Albendazole           | -2.018 | -2.102 |
| C21H23ClFN3O   | DB00690 | Flurazepam            | -2.085 | -2.098 |
| C21H21N        | DB00735 | Naftifine             | -0.861 | -2.091 |
| C16H20N4O3S    | DB00214 | Torsemide             | -1.661 | -2.087 |
| C20H23NO4      | DB00704 | Naltrexone            | 0.131  | -2.085 |
| C16H21N3O2     | DB00315 | Zolmitriptan          | -2.079 | -2.083 |
| C3F8           | DB00556 | Perflutren            | -2.078 | -2.078 |
| C9H10N4O2S2    | DB00576 | Sulfamethizole        | 0.045  | -2.076 |
| C5H8N4O3S2     | DB00703 | Methazolamide         | -1.837 | -2.073 |
| C18H19F3N2S    | DB00508 | Triflupromazine       | -2.066 | -2.067 |
| C20H31NO       | DB00376 | Trihexyphenidyl       | -2.059 | -2.06  |
| C23H32N6O4S    | DB00862 | Vardenafil            | -0.207 | -2.057 |
| C18H24N4O      | DB00889 | Granisetron           | -2.051 | -2.052 |
| C19H21N3O      | DB00425 | Zolpidem              | -1.565 | -2.052 |
| C9H11NO2       | DB00120 | L-Phenylalanine       | -2.041 | -2.041 |
| C5H8N4O3S2     | DB00703 | Methazolamide         | -0.72  | -2.034 |
| C6H12ClNO      | DB00658 | Sevelamer             | -2.023 | -2.025 |
| C17H20N4S      | DB00334 | Olanzapine            | -1.982 | -2.025 |
| C22H27ClF2O4   | DB00596 | Ulobetasol            | -2.019 | -2.019 |
| C12H15ClO3     | DB00636 | Clofibrate            | -2.018 | -2.018 |
| C23H32N6O4S    | DB00862 | Vardenafil            | -0.251 | -2.009 |
| C19H17Cl3N2S   | DB00639 | Butoconazole          | -1.553 | -1.997 |
| C15H13NO3      | DB00465 | Ketorolac             | -1.988 | -1.989 |
| C3H7NO2S       | DB00151 | L-Cysteine            | -1.972 | -1.986 |

|                |         |                       |        |        |
|----------------|---------|-----------------------|--------|--------|
| C16H23NO2      | DB00473 | Hexylcaine            | -1.982 | -1.983 |
| C11H12N4O3S    | DB00664 | Sulfametopyrazine     | -0.946 | -1.981 |
| C22H24N2O9     | DB00595 | Oxytetracycline       | 0.335  | -1.981 |
| C23H32N6O4S    | DB00862 | Vardenafil            | -1.298 | -1.977 |
| C33H35N5O5     | DB00696 | Ergotamine            | 0.366  | -1.973 |
| C21H25CIN2O3   | DB00341 | Cetirizine            | -1.503 | -1.968 |
| C66H83N17O13   | DB00666 | Nafarelin             | -1.341 | -1.968 |
| C10H15N        | DB00191 | Phentermine           | -1.966 | -1.966 |
| C26H31Cl2N5O3  | DB00251 | Terconazole           | -0.806 | -1.964 |
| C43H55N5O7     | DB00309 | Vindesine             | 0.596  | -1.963 |
| C10H20N2S4     | DB00822 | Disulfiram            | -1.962 | -1.962 |
| C11H12N2S      | DB00848 | Levamisole            | -0.75  | -1.962 |
| C6H8N2O8       | DB00883 | Isosorbide dinitrate  | -1.961 | -1.961 |
| C21H29NO       | DB00810 | Biperiden             | -1.952 | -1.954 |
| C19H24N2S      | DB00392 | Profenamine           | -1.951 | -1.952 |
| C18H27NO2      | DB00645 | Dyclonine             | -1.945 | -1.951 |
| C3H5N3O9       | DB00727 | Nitroglycerin         | -1.949 | -1.949 |
| C22H26N2O4S    | DB00343 | Diltiazem             | 0.149  | -1.947 |
| C20H23N        | DB00934 | Maprotiline           | -1.945 | -1.945 |
| C13H19NO       | DB00937 | Diethylpropion        | -1.798 | -1.942 |
| C22H17CIN2     | DB00257 | Clotrimazole          | -1.512 | -1.935 |
| C9H18N6        | DB00488 | Altretamine           | -0.429 | -1.934 |
| C20H24CIN3S    | DB00433 | Prochlorperazine      | -1.636 | -1.916 |
| C18H14N4O5S    | DB00795 | Sulfasalazine         | -1.625 | -1.914 |
| C26H28N2       | DB00568 | Cinnarizine           | -1.819 | -1.907 |
| C20H36N2O3S    | DB00308 | Ibutilide             | 0.458  | -1.904 |
| C5H9Cl2N3O2    | DB00262 | Carmustine            | -1.903 | -1.903 |
| C21H26CINO     | DB00283 | Clemastine            | -1.899 | -1.9   |
| C21H26N2OS2    | DB00933 | Mesoridazine          | -1.896 | -1.897 |
| C24H29N5O3     | DB00177 | Valsartan             | -1.896 | -1.896 |
| C24H29NO3      | DB00843 | Donepezil             | -1.888 | -1.891 |
| C33H35N5O5     | DB00696 | Ergotamine            | -1.7   | -1.877 |
| C45H54N4O8     | DB00361 | Vinorelbine           | -0.577 | -1.876 |
| C5H8N4O3S2     | DB00703 | Methazolamide         | -0.422 | -1.872 |
| C5H11Cl2N      | DB00888 | Mechlorethamine       | -1.806 | -1.87  |
| C21H28N2O5     | DB00662 | Trimethobenzamide     | -1.849 | -1.869 |
| C16H16CIN3O3S  | DB00808 | Indapamide            | -1.865 | -1.868 |
| C12H25NaO4S    | DB00815 | Sodium lauryl sulfate | -1.861 | -1.861 |
| C17H19NO3      | DB00327 | Hydromorphone         | -0.122 | -1.86  |
| C15H14F3N3O4S2 | DB00436 | Bendroflumethiazide   | -1.79  | -1.858 |
| C11H21N        | DB00657 | Mecamylamine          | -1.857 | -1.857 |
| C21H27NO4      | DB00844 | Nalbuphine            | 0.705  | -1.855 |
| C45H54N4O8     | DB00361 | Vinorelbine           | 0.766  | -1.826 |
| C21H30O2       | DB00396 | Progesterone          | -1.824 | -1.824 |
| C16H23BrN2O3   | DB00409 | Remoxipride           | -1.821 | -1.822 |
| C15H14F3N3O4S2 | DB00436 | Bendroflumethiazide   | -0.447 | -1.821 |
| C10H16N6S      | DB00501 | Cimetidine            | -1.031 | -1.816 |
| C16H24N2O      | DB00268 | Ropinirole            | -1.808 | -1.81  |
| C21H24F3N3S    | DB00831 | Trifluoperazine       | 0.534  | -1.809 |
| C11H15NO       | DB00830 | Phenmetrazine         | -1.797 | -1.803 |
| C17H20N2S      | DB00420 | Promazine             | -1.8   | -1.801 |
| C19H24N2       | DB00458 | Imipramine            | -1.799 | -1.799 |
| C17H26N2O      | DB00296 | Ropivacaine           | -1.741 | -1.795 |
| C16H16CIN3O3S  | DB00524 | Metolazone            | -1.785 | -1.787 |
| C22H29N3S2     | DB00372 | Thiethylperazine      | 0.558  | -1.786 |
| C7H9N2O        | DB00733 | Pralidoxime           | -1.554 | -1.779 |
| C26H31Cl2N5O3  | DB00251 | Terconazole           | -0.805 | -1.768 |
| C25H27CIN2     | DB00737 | Meclizine             | -1.572 | -1.765 |
| C10H12N2       | DB00797 | Tolazoline            | -1.762 | -1.762 |
| C20H24N2O6     | DB00401 | Nisoldipine           | -1.757 | -1.757 |
| C21H24F3N3S    | DB00831 | Trifluoperazine       | -1.473 | -1.753 |
| C17H25N3O2S    | DB00918 | Almotriptan           | -1.74  | -1.744 |
| C26H28N2       | DB00568 | Cinnarizine           | 0.918  | -1.742 |

|                |         |                            |        |        |
|----------------|---------|----------------------------|--------|--------|
| C6H15N2O2      | DB00411 | Carbamoylcholine           | -1.738 | -1.738 |
| C32H26N4O2     | DB00872 | Conivaptan                 | -1.34  | -1.731 |
| C19H22N2       | DB00427 | Tripolidine                | -1.727 | -1.729 |
| C17H21N        | DB00865 | Benzphetamine              | -0.098 | -1.711 |
| C20H24CIN3S    | DB00433 | Prochlorperazine           | -1.097 | -1.707 |
| C21H28O2       | DB00367 | Levonorgestrel             | -1.692 | -1.692 |
| C29H41NO4      | DB00921 | Buprenorphine              | -1.685 | -1.685 |
| C21H24F3N3S    | DB00831 | Trifluoperazine            | -1.059 | -1.669 |
| C25H37NO4      | DB00905 | Bimatoprost                | -1.666 | -1.666 |
| C22H29NO2      | DB00647 | Dextropropoxyphene         | -1.66  | -1.665 |
| C11H14N2O4     | DB00949 | Felbamate                  | -1.663 | -1.663 |
| C17H19N3O      | DB00692 | Phentolamine               | -1.661 | -1.661 |
| C17H19N3       | DB00370 | Mirtazapine                | 0.816  | -1.659 |
| C11H11N3O2S    | DB00891 | Sulfapyridine              | -0.612 | -1.65  |
| C2H7NS         | DB00847 | Cysteamine                 | 0.537  | -1.646 |
| C18H20N2S      | DB00902 | Methdilazine               | -1.641 | -1.642 |
| C14H15N3O5     | DB00494 | Entacapone                 | -1.635 | -1.635 |
| C31H33F3N2O5S  | DB00932 | Tipranavir                 | -0.7   | -1.632 |
| C10H16N6S      | DB00501 | Cimetidine                 | -0.936 | -1.618 |
| C17H21N        | DB00865 | Benzphetamine              | -1.569 | -1.61  |
| C14H21N3O3S    | DB00839 | Tolazamide                 | 0.32   | -1.6   |
| C25H27CIN2     | DB00737 | Meclizine                  | 0.563  | -1.599 |
| C22H25N3O4S    | DB00680 | Moricizine                 | 0.095  | -1.596 |
| C22H29N3S2     | DB00372 | Thiethylperazine           | -0.983 | -1.593 |
| C25H27CIN2     | DB00737 | Meclizine                  | -0.775 | -1.59  |
| C10H13CIN2O3S  | DB00672 | Chlorpropamide             | -1.579 | -1.586 |
| C51H79NO13     | DB00877 | Sirolimus                  | -1.582 | -1.583 |
| C11H11N3O2S    | DB00891 | Sulfapyridine              | -1.424 | -1.581 |
| C12H21N        | DB00478 | Rimantadine                | -1.576 | -1.576 |
| C10H16N2O4S3   | DB00869 | Dorzolamide                | -0.151 | -1.563 |
| C7H9N2O        | DB00733 | Pralidoxime                | -0.875 | -1.557 |
| C16H21N3       | DB00792 | Tripeleminamine            | -1.55  | -1.555 |
| C14H30N2O4     | DB00202 | Succinylcholine            | -1.543 | -1.543 |
| C19H29NO       | DB00942 | Cycrimine                  | -1.524 | -1.525 |
| C18H13Cl4N3O   | DB00239 | Oxiconazole                | -1.402 | -1.515 |
| C21H25NO       | DB00245 | Benzatropine               | -1.49  | -1.491 |
| C19H35NO2      | DB00804 | Dicyclomine                | -1.469 | -1.486 |
| C22H19N3O4     | DB00820 | Tadalafil                  | -1.485 | -1.485 |
| C21H21CIN4OS   | DB00246 | Ziprasidone                | -1.235 | -1.466 |
| C18H27NO2      | DB00645 | Dyclonine                  | 1.244  | -1.462 |
| C22H25N3O4S    | DB00680 | Moricizine                 | -1.27  | -1.46  |
| C3H7NO2        | DB00160 | L-Alanine                  | -1.445 | -1.445 |
| C21H31N5O2     | DB00490 | Buspirone                  | -0.918 | -1.423 |
| C17H32BrNO2    | DB00517 | Anisotropine methylbromide | -1.418 | -1.418 |
| C29H35NO2      | DB00834 | Mifepristone               | -1.39  | -1.406 |
| C28H33CIN2     | DB00354 | Buclizine                  | 0.784  | -1.378 |
| C30H60I3N3O3   | DB00483 | Gallamine Triethiodide     | -1.373 | -1.373 |
| C46H58N4O9     | DB00570 | Vinblastine                | -0.479 | -1.347 |
| C19H35NO2      | DB00804 | Dicyclomine                | 0.773  | -1.345 |
| C18H26CIN3     | DB00608 | Chloroquine                | 0.352  | -1.324 |
| C25H38O5       | DB00641 | Simvastatin                | -1.32  | -1.32  |
| C10H10N4O2S    | DB00359 | Sulfadiazine               | -1.16  | -1.316 |
| C2H5NO2        | DB00145 | Glycine                    | -1.31  | -1.31  |
| C24H34N4O5S    | DB00222 | Glimepiride                | 0.638  | -1.285 |
| C21H26CIN3OS   | DB00850 | Perphenazine               | -0.687 | -1.234 |
| C14H16CIN3O4S2 | DB00606 | Cyclothiazide              | -1.204 | -1.217 |
| C31H33F3N2O5S  | DB00932 | Tipranavir                 | -1.055 | -1.193 |
| C21H26N2S2     | DB00679 | Thioridazine               | -1.178 | -1.179 |
| C32H26N4O2     | DB00872 | Conivaptan                 | -0.269 | -1.046 |
| C9H13N2O2      | DB00545 | Pyridostigmine             | -0.957 | -0.957 |
| C21H32N6O3     | DB00802 | Alfentanil                 | 0.402  | -0.918 |
| C22H28N2O      | DB00813 | Fentanyl                   | -0.896 | -0.913 |
| C46H58N4O9     | DB00570 | Vinblastine                | -0.652 | -0.913 |



|               |         |                             |        |        |
|---------------|---------|-----------------------------|--------|--------|
| C19H17NOS     | DB00525 | Tolnaftate                  | -0.902 | -0.902 |
| C28H31FN4O    | DB00637 | Astemizole                  | -0.387 | -0.901 |
| C20H28N2O5    | DB00899 | Remifentanil                | -0.557 | -0.843 |
| C18H21NO4     | DB00497 | Oxycodone                   | 0.338  | -0.783 |
| C18H21NO3     | DB00318 | Codeine                     | 0.769  | -0.775 |
| C12H24N2O4    | DB00395 | Carisoprodol                | -0.763 | -0.763 |
| C14H21N3O3S   | DB00839 | Tolazamide                  | -0.658 | -0.682 |
| C28H27NO4S    | DB00481 | Raloxifene                  | -0.658 | -0.673 |
| C31H33N3O6S   | DB00549 | Zafirlukast                 | 2.012  | -0.649 |
| C2H6O         | DB00898 | Ethanol                     | -0.632 | -0.632 |
| C10H17N       | DB00915 | Amantadine                  | -0.531 | -0.531 |
| C22H30N2O2S   | DB00708 | Sufentanil                  | -0.482 | -0.521 |
| C10H24N2O2    | DB00330 | Ethambutol                  | 0.348  | -0.451 |
| C22H30N2O2S   | DB00708 | Sufentanil                  | 1.218  | -0.416 |
| C27H29N5O6S   | DB00559 | Bosentan                    | -0.284 | -0.284 |
| C22H46O       | DB00632 | Docosanol                   | -0.283 | -0.283 |
| C17H19NO3     | DB00327 | Hydromorphone               | 1.986  | -0.118 |
| C12H19NO3     | DB00871 | Terbutaline                 | 2.149  | -0.066 |
| C11H17NO3     | DB00816 | Orciprenaline               | -0.039 | -0.053 |
| C32H53N2O4    | DB00728 | Rocuronium                  | 0.206  | 0.059  |
| C33H38N4O6    | DB00762 | Irinotecan                  | 0.307  | 0.304  |
| C11H11N3O2S   | DB00891 | Sulfapyridine               | 2.005  | 0.337  |
| C17H21NO4     | DB00907 | Cocaine                     | 0.442  | 0.385  |
| C23H36N6O5S   | DB00278 | Argatroban                  | 0.45   | 0.45   |
| C20H28N2O5    | DB00899 | Remifentanil                | 1.088  | 0.52   |
| C21H32N6O3    | DB00802 | Alfentanil                  | 0.703  | 0.636  |
| C18H30O2      | DB00132 | Alpha-Linolenic Acid        | 0.683  | 0.68   |
| C20H21N       | DB00924 | Cyclobenzaprine             | 0.746  | 0.742  |
| C24H34O4      | DB00603 | Medroxyprogesterone acetate | 0.771  | 0.771  |
| C15H20N2O4S   | DB00414 | Acetohexamide               | 0.783  | 0.778  |
| C21H26N2O7    | DB00393 | Nimodipine                  | 0.858  | 0.858  |
| C65H82N2O18S2 | DB00732 | Atracurium besylate         | 0.953  | 0.953  |
| C52H88N10O15  | DB00520 | Caspofungin                 | 3.772  | 1.179  |
| C43H55N5O7    | DB00309 | Vindesine                   | 1.713  | 1.523  |
| C18H22ClNO    | DB00925 | Phenoxybenzamine            | 2.203  | 1.754  |
| C32H52N4O4    | DB00944 | Demecarium                  | 1.99   | 1.99   |
| C19H20N2O3    | DB00757 | Dolasetron                  | 2.171  | 2.03   |
| C32H53N2O4    | DB00728 | Rocuronium                  | 5.871  | 4.973  |

### FDA approved drugs with 6y84, Table S8

| FORMULA        | DRUGBANK_ID | GENERIC_NAME    | docking score | glide gscore |
|----------------|-------------|-----------------|---------------|--------------|
| C23H45N5O14    | DB01421     | Paromomycin     | -9.463        | -11.579      |
| C23H45N5O14    | DB01421     | Paromomycin     | -9.859        | -10.848      |
| C23H45N5O14    | DB01421     | Paromomycin     | -8.866        | -10.611      |
| C23H45N5O14    | DB01421     | Paromomycin     | -8.223        | -10.413      |
| C27H30O16      | DB01698     | Rutin           | -9.824        | -9.853       |
| C28H44N2O23    | DB08818     | Hyaluronic acid | -9.786        | -9.786       |
| C52H76O24      | DB06810     | Plicamycin      | -7.673        | -9.777       |
| C5H15N2O3PS    | DB01143     | Amifostine      | -9.588        | -9.628       |
| C21H39N7O12    | DB01082     | Streptomycin    | -8.624        | -9.463       |
| C52H74N16O15S2 | DB02638     | Terlipressin    | -9.292        | -9.406       |
| C23H45N5O14    | DB01421     | Paromomycin     | -6.785        | -9.389       |
| C17H34N4O10    | DB03615     | Ribostamycin    | -8.836        | -9.257       |
| C52H76O24      | DB06810     | Plicamycin      | -7.44         | -9.153       |
| C17H34N4O10    | DB03615     | Ribostamycin    | -7.077        | -9.095       |
| C52H74N16O15S2 | DB02638     | Terlipressin    | -8.028        | -9.063       |
| C22H28N4O6     | DB01204     | Mitoxantrone    | -8.991        | -8.991       |
| C17H34N4O10    | DB03615     | Ribostamycin    | -7.409        | -8.973       |
| C27H30O16      | DB01698     | Rutin           | -6.914        | -8.834       |
| C23H45N5O14    | DB01421     | Paromomycin     | -7.35         | -8.788       |
| C35H44I6N6O15  | DB01249     | Iodixanol       | -8.717        | -8.717       |

|                     |         |                                             |        |        |
|---------------------|---------|---------------------------------------------|--------|--------|
| C17H34N4O10         | DB03615 | Ribostamycin                                | -6.982 | -8.584 |
| C27H33N9O15P2       | DB03147 | Flavin adenine dinucleotide                 | -8.524 | -8.524 |
| C12H22O11           | DB04465 | Lactose                                     | -8.514 | -8.514 |
| C23H45N5O14         | DB01421 | Paromomycin                                 | -5.946 | -8.347 |
| C23H45N5O14         | DB01421 | Paromomycin                                 | -6.209 | -8.059 |
| C18H36N4O11         | DB01172 | Kanamycin                                   | -6.497 | -8.048 |
| C17H34N4O10         | DB03615 | Ribostamycin                                | -7.261 | -7.981 |
| C27H29NO11          | DB00997 | Doxorubicin                                 | -7.951 | -7.978 |
| C21H39N7O12         | DB01082 | Streptomycin                                | -7.683 | -7.848 |
| C18H36N4O11         | DB01172 | Kanamycin                                   | -6.276 | -7.845 |
| C5H13O14P3          | DB01632 | 5-O-phosphono-alpha-D-ribofuranosyl diphosp | -5.452 | -7.787 |
| C23H28F2N6O4S       | DB08816 | Ticagrelor                                  | -7.054 | -7.77  |
| C17H34N4O10         | DB03615 | Ribostamycin                                | -5.696 | -7.595 |
| C23H45N5O14         | DB01421 | Paromomycin                                 | -6.865 | -7.495 |
| C6H17N2O12P4Sm      | DB05273 | Samarium (153Sm) lexicronam                 | -7.466 | -7.484 |
| C59H89N19O13S       | DB06196 | Icatibant                                   | -7.351 | -7.476 |
| C18H23NO4           | DB01102 | Arbutamine                                  | -4.743 | -7.456 |
| C52H76O24           | DB06810 | Plicamycin                                  | -7.279 | -7.332 |
| C6H17N2O12P4Sm      | DB05273 | Samarium (153Sm) lexicronam                 | -4.734 | -7.323 |
| C12H22O11           | DB02772 | Sucrose                                     | -7.282 | -7.282 |
| C17H25Cl2F3N5O12P3S | DB06441 | Cangrelor                                   | -5.01  | -7.237 |
| C26H27NO9           | DB01177 | Idarubicin                                  | -7.19  | -7.217 |
| C18H21NO5           | DB06814 | Protokylol                                  | -4.825 | -7.133 |
| C28H34O15           | DB04703 | Hesperidin                                  | -7.067 | -7.067 |
| C35H35F2N8O5S       | DB06636 | Isavuconazonium                             | -6.538 | -7.042 |
| C5H13O14P3          | DB01632 | 5-O-phosphono-alpha-D-ribofuranosyl diphosp | -5.706 | -6.939 |
| C27H29NO11          | DB00997 | Doxorubicin                                 | -5.075 | -6.915 |
| C23H45N5O14         | DB01421 | Paromomycin                                 | -5.772 | -6.854 |
| C18H34N2O6S         | DB01627 | Lincomycin                                  | -4.437 | -6.85  |
| C23H23N7O5          | DB06813 | Pralatrexate                                | -6.756 | -6.798 |
| C26H27NO9           | DB01177 | Idarubicin                                  | -4.934 | -6.775 |
| C64H82N18O13        | DB06825 | Triptorelin                                 | -6.135 | -6.762 |
| C5H13O14P3          | DB01632 | 5-O-phosphono-alpha-D-ribofuranosyl diphosp | -5.453 | -6.734 |
| C17H25Cl2F3N5O12P3S | DB06441 | Cangrelor                                   | -6.706 | -6.72  |
| C70H94N18O16        | DB06788 | Histrelin                                   | -5.293 | -6.693 |
| C18H21NO5           | DB06814 | Protokylol                                  | -6.678 | -6.69  |
| C64H82N18O13        | DB06825 | Triptorelin                                 | -5.848 | -6.674 |
| C23H27N3O7          | DB01017 | Minocycline                                 | -6.561 | -6.672 |
| C43H74N2O14         | DB06145 | Spiramycin                                  | -4.13  | -6.665 |
| C23H27N3O7          | DB01017 | Minocycline                                 | -5.568 | -6.654 |
| C20H32N6O12S2       | DB03310 | Glutathione disulfide                       | -6.645 | -6.649 |
| C15H18N8O5          | DB06213 | Regadenoson                                 | -6.63  | -6.63  |
| C18H36N4O11         | DB01172 | Kanamycin                                   | -6.465 | -6.614 |
| C17H21NO4           | DB01288 | Fenoterol                                   | -3.953 | -6.592 |
| C19H24N2O4          | DB01274 | Arformoterol                                | -4.223 | -6.531 |
| C15H24N4O6S2        | DB06211 | Doripenem                                   | -6.123 | -6.523 |
| C41H64O13           | DB01396 | Digitoxin                                   | -6.484 | -6.484 |
| C52H74Cl2O18        | DB08874 | Fidaxomicin                                 | -6.399 | -6.417 |
| C20H14I6N2O6        | DB04711 | Iodipamide                                  | -6.389 | -6.389 |
| C20H22N8O6S2        | DB04918 | Ceftobiprole                                | -6.32  | -6.32  |
| C70H94N18O16        | DB06788 | Histrelin                                   | -5.015 | -6.316 |
| C19H26I3N3O9        | DB01362 | Iohexol                                     | -6.254 | -6.254 |
| C14H22N6O5          | DB01610 | Valganciclovir                              | -5.534 | -6.243 |
| C18H18N6O8S3        | DB01328 | Cefonicid                                   | -6.201 | -6.201 |
| C22H21N8O8PS4       | DB06590 | Ceftaroline fosamil                         | -5.863 | -6.164 |
| C23H22F7N4O6P       | DB06717 | Fosaprepitant                               | -5.707 | -6.152 |
| C38H50N6O5          | DB01232 | Saquinavir                                  | -3.822 | -6.082 |
| C18H23NO4           | DB01102 | Arbutamine                                  | -6.049 | -6.055 |
| C19H21NO4           | DB01183 | Naloxone                                    | -5.904 | -6.028 |
| C12H17N3O4S         | DB01598 | Imipenem                                    | -6.004 | -6.004 |
| C25H34F2O5          | DB08819 | Tafluprost                                  | -5.984 | -5.984 |
| C23H23N7O5          | DB06813 | Pralatrexate                                | -4.382 | -5.977 |
| C32H40BrN5O5        | DB01200 | Bromocriptine                               | -5.134 | -5.971 |

|               |         |                                              |        |        |
|---------------|---------|----------------------------------------------|--------|--------|
| C6H14O6       | DB01638 | Sorbitol                                     | -5.92  | -5.92  |
| C25H34O6      | DB05013 | Ingenol mebutate                             | -5.912 | -5.912 |
| C29H44O12     | DB01092 | Ouabain                                      | -5.907 | -5.907 |
| C52H74Cl2O18  | DB08874 | Fidaxomicin                                  | -3.411 | -5.896 |
| C12H18N4O7P2S | DB01987 | Cocarboxylase                                | -4.597 | -5.882 |
| C17H21NO4     | DB01288 | Fenoterol                                    | -3.633 | -5.849 |
| C19H33NO2     | DB08868 | Fingolimod                                   | -5.796 | -5.839 |
| C23H28F2N6O4S | DB08816 | Ticagrelor                                   | -5.604 | -5.826 |
| C24H28F3N3O3  | DB06608 | Tafenoquine                                  | -3.123 | -5.8   |
| C11H15N5O5    | DB01280 | Nelarabine                                   | -5.799 | -5.799 |
| C17H21N4O9P   | DB03247 | Flavin mononucleotide                        | -4.724 | -5.799 |
| C23H23N3O5    | DB01030 | Topotecan                                    | -4.489 | -5.766 |
| C17H21N4O9P   | DB03247 | Flavin mononucleotide                        | -5.654 | -5.759 |
| C27H37N3O7S   | DB01264 | Darunavir                                    | -5.744 | -5.744 |
| C23H45N5O14   | DB01421 | Paromomycin                                  | -3.488 | -5.734 |
| C16H17N3O5S   | DB01140 | Cefadroxil                                   | -5.516 | -5.725 |
| C38H69NO13    | DB01211 | Clarithromycin                               | -5.677 | -5.684 |
| C23H30GdN3O11 | DB08884 | Gadoxetic acid                               | -5.292 | -5.679 |
| C17H27NO4     | DB01203 | Nadolol                                      | -5.673 | -5.674 |
| C18H33ClN2O5S | DB01190 | Clindamycin                                  | -3.305 | -5.661 |
| C25H28N8O2    | DB08882 | Linagliptin                                  | -5.658 | -5.658 |
| C10H12FN5O4   | DB01073 | Fludarabine                                  | -5.656 | -5.656 |
| C24H25FO5S    | DB08907 | Canagliflozin                                | -5.649 | -5.649 |
| C21H27NO3     | DB01182 | Propafenone                                  | -5.637 | -5.641 |
| C21H24N4O2S   | DB08893 | Mirabegron                                   | -5.454 | -5.622 |
| C58H66N10O9   | DB06663 | Pasireotide                                  | -5.615 | -5.615 |
| C15H23N3O4S   | DB01000 | Cyclacillin                                  | -4.382 | -5.609 |
| C19H24N2O4    | DB00983 | Formoterol                                   | -3.277 | -5.585 |
| C5H13O14P3    | DB01632 | 5-O-phosphono-alpha-D-ribofuranosyl diphosph | -5.405 | -5.583 |
| C16H17N3O5S   | DB01140 | Cefadroxil                                   | -4.854 | -5.578 |
| C24H40O5      | DB02659 | Cholic Acid                                  | -5.561 | -5.566 |
| C15H16Cl2N2O8 | DB07565 | Chloramphenicol succinate                    | -5.561 | -5.561 |
| C25H27N9O8S2  | DB01329 | Cefoperazone                                 | -5.56  | -5.56  |
| C24H28F3N3O3  | DB06608 | Tafenoquine                                  | -5.553 | -5.559 |
| C8H12N4O4     | DB01262 | Decitabine                                   | -3.052 | -5.554 |
| C32H40BrN5O5  | DB01200 | Bromocriptine                                | -5.36  | -5.539 |
| C30H34N2O3    | DB06401 | Bazedoxifene                                 | -5.524 | -5.534 |
| C7H9ClO6P2S   | DB01133 | Tiludronic acid                              | -4.135 | -5.525 |
| C24H28N2O3    | DB05039 | Indacaterol                                  | -3.742 | -5.523 |
| C6H13NO5      | DB01296 | Glucosamine                                  | -4.664 | -5.498 |
| C18H19N3O5S   | DB01150 | Cefprozil                                    | -5.215 | -5.497 |
| C23H29N3O2S   | DB01063 | Acetophenazine                               | -4.931 | -5.479 |
| C19H23N5O3    | DB01157 | Trimetrexate                                 | -3.212 | -5.479 |
| C6H13NO5      | DB01296 | Glucosamine                                  | -5.299 | -5.466 |
| C21H25ClO6    | DB06292 | Dapagliflozin                                | -5.451 | -5.451 |
| C19H24N2O4    | DB01274 | Arformoterol                                 | -5.435 | -5.447 |
| C19H22FN3O4   | DB01044 | Gatifloxacin                                 | -4.292 | -5.438 |
| C19H18N6O5S3  | DB01066 | Cefditoren                                   | -5.429 | -5.429 |
| C18H36N4O11   | DB01172 | Kanamycin                                    | -3.915 | -5.429 |
| C18H24O3      | DB04573 | Estriol                                      | -5.428 | -5.428 |
| C27H40O3      | DB02300 | Calcipotriol                                 | -5.425 | -5.425 |
| C33H30N4O2    | DB00966 | Telmisartan                                  | -5.14  | -5.414 |
| C14H8O4       | DB04816 | Dantron                                      | -5.409 | -5.409 |
| C16H18FN3O3   | DB01059 | Norfloxacin                                  | -4.296 | -5.4   |
| C25H29I2NO3   | DB01118 | Amiodarone                                   | -3.386 | -5.399 |
| C47H74O19     | DB01078 | Deslanoside                                  | -5.383 | -5.383 |
| C21H25N3O2S   | DB01224 | Quetiapine                                   | -4.194 | -5.375 |
| C24H23ClO2    | DB04938 | Ospemifene                                   | -5.371 | -5.371 |
| C14H18N6O     | DB01048 | Abacavir                                     | -5.36  | -5.365 |
| C22H31N3O5    | DB01340 | Cilazapril                                   | -5.117 | -5.355 |
| C22H31NO3     | DB01062 | Oxybutynin                                   | -4.12  | -5.353 |
| C18H18N8O7S3  | DB01212 | Ceftriaxone                                  | -5.349 | -5.349 |
| C32H40BrN5O5  | DB01200 | Bromocriptine                                | -2.757 | -5.347 |

|                   |         |                        |        |        |
|-------------------|---------|------------------------|--------|--------|
| C18H26ClN3O       | DB01611 | Hydroxychloroquine     | -3.637 | -5.34  |
| C21H25NO3         | DB06230 | Nalmefene              | -5.277 | -5.308 |
| C18H18N6O5S2      | DB01326 | Cefamandole            | -5.291 | -5.291 |
| C38H50N6O5        | DB01232 | Saquinavir             | -5.278 | -5.291 |
| C15H17N5O6S2      | DB01416 | Cefpodoxime            | -5.29  | -5.29  |
| C21H25NO3         | DB06230 | Nalmefene              | -3.336 | -5.283 |
| C17H21NO4         | DB01288 | Fenoterol              | -5.261 | -5.282 |
| C33H30N4O2        | DB00966 | Telmisartan            | -3.384 | -5.256 |
| C12H7Cl3O2        | DB08604 | Triclosan              | -4.695 | -5.254 |
| C16H19N3O5S       | DB01060 | Amoxicillin            | -4.48  | -5.245 |
| C25H32F3N3O4      | DB06207 | Silodosin              | -5.24  | -5.244 |
| C22H24BrFN4O2     | DB05294 | Vandetanib             | -5.242 | -5.242 |
| C9H13N3O5         | DB00987 | Cytarabine             | -5.232 | -5.232 |
| C28H29NO4S        | DB06249 | Arzoxifene             | -2.543 | -5.23  |
| C14H10BN03        | DB05219 | Crisaborole            | -5.229 | -5.229 |
| C10H13NO4         | DB00968 | Methyldopa             | -5.226 | -5.226 |
| C17H20O6          | DB01024 | Mycophenolic acid      | -5.192 | -5.224 |
| C20H20FN03S       | DB06209 | Prasugrel              | -4.995 | -5.221 |
| C6H12O6           | DB04173 | Fructose               | -5.213 | -5.213 |
| C22H24ClN5O2      | DB01184 | Domperidone            | -3.108 | -5.213 |
| C22H29FO5         | DB01234 | Dexamethasone          | -5.209 | -5.209 |
| C64H82N18O13      | DB06825 | Triptorelin            | -4.669 | -5.204 |
| C22H30N2O5S2      | DB01348 | Spirapril              | -4.285 | -5.202 |
| C15H21N3O         | DB01087 | Primaquine             | -5.19  | -5.19  |
| C27H30F6N2O2      | DB01126 | Dutasteride            | -5.187 | -5.187 |
| C14H16N2O6S3      | DB01145 | Sulfoxone              | -5.186 | -5.186 |
| C24H25ClFN5O3     | DB08916 | Afatinib               | -3.366 | -5.181 |
| C20H24O2          | DB00977 | Ethinylestradiol       | -5.171 | -5.171 |
| C17H19F2N3O3      | DB00978 | Lomefloxacin           | -3.817 | -5.171 |
| C22H26ClN7O2S     | DB01254 | Dasatinib              | -4.734 | -5.168 |
| C33H38GdN3Na3O14P | DB06705 | Gadofosveset trisodium | -3.025 | -5.166 |
| C43H53NO14        | DB01248 | Docetaxel              | -5.156 | -5.158 |
| C2H8O7P2          | DB01077 | Etidronic acid         | -4.91  | -5.156 |
| C21H20Cl2O3       | DB04930 | Permethrin             | -5.155 | -5.155 |
| C22H21N8O8PS4     | DB06590 | Ceftaroline fosamil    | -4.609 | -5.154 |
| C21H23Cl2NO6      | DB04920 | Clevidipine            | -5.151 | -5.151 |
| C19H25N5O4        | DB01162 | Terazosin              | -4.074 | -5.147 |
| C16H19N3O4S       | DB01333 | Cefradine              | -4.855 | -5.132 |
| C16H23N5O         | DB01079 | Tegaserod              | -5.128 | -5.128 |
| C18H23NO3         | DB01551 | Dihydrocodeine         | -2.906 | -5.128 |
| C24H31NO          | DB05812 | Abiraterone            | -3.127 | -5.127 |
| C33H60O10         | DB06804 | Nonoxynol-9            | -5.12  | -5.12  |
| C34H50N4O9S       | DB01764 | Dalfopristin           | -4.878 | -5.115 |
| C24H45NO8         | DB01160 | Dinoprost tromethamine | -5.11  | -5.113 |
| C22H30MnN4O14P2   | DB06796 | Mangafodipir           | -3.761 | -5.108 |
| C13H10N2O4        | DB01041 | Thalidomide            | -5.105 | -5.105 |
| C13H11N3O4        | DB08910 | Pomalidomide           | -5.097 | -5.097 |
| C22H31N3O5        | DB01340 | Cilazapril             | -4.436 | -5.091 |
| C19H20N2O3        | DB03585 | Oxyphenbutazone        | -2.536 | -5.091 |
| C19H23N5O3        | DB01157 | Trimetrexate           | -3.058 | -5.087 |
| C14H14N8O4S3      | DB01327 | Cefazolin              | -5.086 | -5.086 |
| C22H26ClN7O2S     | DB01254 | Dasatinib              | -2.988 | -5.085 |
| C27H33N3O8        | DB01301 | Rolitetraacycline      | -4.142 | -5.08  |
| C19H33NO2         | DB08868 | Fingolimod             | -3.499 | -5.075 |
| C19H23N3O2        | DB01253 | Ergometrine            | -4.444 | -5.07  |
| C25H29I2NO3       | DB01118 | Amiodarone             | -5.048 | -5.068 |
| C23H20F3N5O2S2    | DB08912 | Dabrafenib             | -4.658 | -5.064 |
| C27H46O           | DB04540 | Cholesterol            | -5.061 | -5.061 |
| C9H13NO3          | DB06707 | Levonordefrin          | -5.043 | -5.06  |
| C22H25F2NO4       | DB04861 | Nebivolol              | -5.04  | -5.06  |
| C52H74Cl2O18      | DB08874 | Fidaxomicin            | -2.363 | -5.044 |
| C19H21NO4         | DB01183 | Naloxone               | -3.955 | -5.042 |
| C22H32O4          | DB01088 | Iloprost               | -5.029 | -5.032 |

|                |         |                           |        |        |
|----------------|---------|---------------------------|--------|--------|
| C2H8O7P2       | DB01077 | Etidronic acid            | -4.389 | -5.029 |
| C19H22F2N4O3   | DB01208 | Sparfloxacin              | -4.934 | -5.016 |
| C21H15N3O4     | DB01609 | Deferasirox               | -5.009 | -5.015 |
| C17H19FN2O2    | DB06654 | Safinamide                | -4.828 | -5.014 |
| C13H21O5P      | DB06716 | Fospropofol               | -3.588 | -4.997 |
| C18H34N2O6S    | DB01627 | Lincomycin                | -4.981 | -4.991 |
| C70H94N18O16   | DB06788 | Histrelin                 | -3.605 | -4.988 |
| C25H25N5O4     | DB06605 | Apixaban                  | -4.987 | -4.987 |
| C17H17N3O6S2   | DB01139 | Cefapirin                 | -4.978 | -4.987 |
| C20H26N2O2     | DB01426 | Ajmaline                  | -4.488 | -4.987 |
| C26H29Cl2N5O3  | DB06616 | Bosutinib                 | -4.872 | -4.985 |
| C18H20FN3O4    | DB01137 | Levofloxacin              | -2.428 | -4.98  |
| C18H20FN3O4    | DB01165 | Ofloxacin                 | -2.428 | -4.98  |
| C22H25F2NO4    | DB04861 | Nebivolol                 | -2.956 | -4.979 |
| C31H48O6       | DB02703 | Fusidic acid              | -4.958 | -4.977 |
| C18H27NO3      | DB06774 | Capsaicin                 | -4.973 | -4.973 |
| C23H26ClN7O3   | DB06237 | Avanafil                  | -4.933 | -4.97  |
| C13H11N3       | DB01123 | Proflavine                | -3.197 | -4.964 |
| C19H20N2O3     | DB03585 | Oxyphenbutazone           | -4.954 | -4.962 |
| C19H22NO4S2    | DB01409 | Tiotropium                | -4.958 | -4.958 |
| C22H31NO       | DB01036 | Tolterodine               | -4.956 | -4.956 |
| C22H26ClN7O2S  | DB01254 | Dasatinib                 | -4.527 | -4.949 |
| C18H19N3O5S    | DB01150 | Cefprozil                 | -4.37  | -4.944 |
| C19H25NOS      | DB05271 | Rotigotine                | -2.224 | -4.942 |
| C17H19FN2O2    | DB06654 | Safinamide                | -4.159 | -4.938 |
| C11H13BrN2O5   | DB03312 | Brivudine                 | -2.863 | -4.933 |
| C59H89N19O13S  | DB06196 | Icatibant                 | -3.944 | -4.926 |
| C6H12O6        | DB01914 | D-glucose                 | -4.925 | -4.925 |
| C22H22N2O4     | DB06403 | Ambrisentan               | -4.923 | -4.923 |
| C17H18N6       | DB08877 | Ruxolitinib               | -4.922 | -4.922 |
| C22H30O5       | DB00959 | Methylprednisolone        | -4.921 | -4.921 |
| C18H20FN5O4    | DB01155 | Gemifloxacin              | -3.312 | -4.915 |
| C22H30N2O5S2   | DB01348 | Spirapril                 | -4.767 | -4.909 |
| C21H25ClN2O3   | DB04890 | Bepotastine               | -4.902 | -4.907 |
| C53H83NO14     | DB01590 | Everolimus                | -4.904 | -4.906 |
| C28H31NO2      | DB06202 | Lasofoxifene              | -4.898 | -4.903 |
| C15H14N4O6S2   | DB01415 | Ceftibuten                | -4.9   | -4.9   |
| C22H25NO6      | DB01394 | Colchicine                | -4.89  | -4.89  |
| C54H69N11O10S2 | DB06791 | Lanreotide                | -4.178 | -4.887 |
| C20H21FN6O5    | DB06817 | Raltegravir               | -4.29  | -4.883 |
| C16H19N3O4S    | DB01333 | Cefradine                 | -4.297 | -4.881 |
| C33H30N4O2     | DB00966 | Telmisartan               | -2.714 | -4.871 |
| C13H13N5O5S2   | DB01332 | Ceftizoxime               | -4.866 | -4.866 |
| C20H32O5       | DB01240 | Epoprostenol              | -4.861 | -4.864 |
| C18H33ClN2O5S  | DB01190 | Clindamycin               | -4.846 | -4.857 |
| C16H16N4O8S    | DB01112 | Cefuroxime                | -4.855 | -4.855 |
| C19H24N6O5S2   | DB01413 | Cefepime                  | -4.845 | -4.845 |
| C16H14N2O4     | DB01025 | Amlexanox                 | -4.827 | -4.844 |
| C29H39NO9      | DB04865 | Omacetaxine mepesuccinate | -4.718 | -4.831 |
| C19H20N2O3S    | DB01132 | Pioglitazone              | -4.39  | -4.83  |
| C17H17N3O6S2   | DB01139 | Cefapirin                 | -2.33  | -4.829 |
| C17H17ClN6O3   | DB01198 | Zopiclone                 | -4.35  | -4.828 |
| C15H14N2O4S    | DB05015 | Belinostat                | -2.571 | -4.824 |
| C7H9ClO6P2S    | DB01133 | Tiludronic acid           | -4.751 | -4.811 |
| C35H35F2N8O5S  | DB06636 | Isavuconazonium           | -3.038 | -4.811 |
| C18H21N3O3S    | DB01129 | Rabeprazole               | -3.108 | -4.808 |
| C21H32O3       | DB06412 | Oxymetholone              | -4.03  | -4.8   |
| C15H15NO2S     | DB06413 | Armodafinil               | -4.796 | -4.796 |
| C17H19N5O2     | DB06193 | Pixantrone                | -4.795 | -4.795 |
| C23H30O6       | DB01380 | Cortisone acetate         | -4.795 | -4.795 |
| C16H20N6O      | DB08895 | Tofacitinib               | -4.783 | -4.794 |
| C16H27NO6      | DB08872 | Gabapentin enacarbil      | -4.788 | -4.791 |
| C12H18N4O7P2S  | DB01987 | Cocarboxylase             | -4.696 | -4.787 |

|                 |         |                       |        |        |
|-----------------|---------|-----------------------|--------|--------|
| C47H64N4O12     | DB01201 | Rifapentine           | -3.709 | -4.786 |
| C21H32O3        | DB06412 | Oxymetholone          | -4.577 | -4.785 |
| C20H31NO4       | DB06217 | Vernakalant           | -4.777 | -4.783 |
| C27H45N5O5      | DB08873 | Boceprevir            | -4.78  | -4.78  |
| C17H19NO4       | DB01192 | Oxymorphone           | -4.656 | -4.775 |
| C30H34N2O3      | DB06401 | Bazedoxifene          | -2.314 | -4.771 |
| C23H20N2O3S     | DB01138 | Sulfapyrazone         | -4.768 | -4.77  |
| C16H19N3O5S     | DB01060 | Amoxicillin           | -4.573 | -4.765 |
| C19H20N2O3S     | DB01132 | Pioglitazone          | -4.281 | -4.764 |
| C24H40O4        | DB03619 | Deoxycholic Acid      | -4.758 | -4.762 |
| C25H32CIN5O2    | DB01149 | Nefazodone            | -4.359 | -4.762 |
| C29H53NO5       | DB01083 | Orlistat              | -4.761 | -4.761 |
| C11H17NO3       | DB01064 | Isoprenaline          | -4.757 | -4.757 |
| C24H21F2NO3     | DB00973 | Ezetimibe             | -4.756 | -4.757 |
| C27H44O2        | DB01436 | Alfacalcidol          | -4.755 | -4.755 |
| C11H13BrN2O5    | DB03312 | Brivudine             | -4.735 | -4.753 |
| C22H28FN3O6S    | DB01098 | Rosuvastatin          | -4.746 | -4.748 |
| C38H52N6O7      | DB01072 | Atazanavir            | -2.157 | -4.734 |
| C18H28N2O4      | DB01193 | Acebutolol            | -4.727 | -4.729 |
| C15H17NO2       | DB06594 | Agomelatine           | -4.726 | -4.726 |
| C28H29NO4S      | DB06249 | Arzoxifene            | -4.71  | -4.726 |
| C21H32O3        | DB06412 | Oxymetholone          | -2.465 | -4.718 |
| C5H9NO4S        | DB04339 | Carbocisteine         | -2.024 | -4.718 |
| C12H18N4O7P2S   | DB01987 | Cocarboxylase         | -2.583 | -4.705 |
| C24H28N2O3      | DB05039 | Indacaterol           | -4.658 | -4.7   |
| C21H23N3O2      | DB06603 | Panobinostat          | -4.698 | -4.698 |
| C32H36N4O5      | DB01346 | Quinidine barbiturate | -2.42  | -4.695 |
| C27H33N3O8      | DB01301 | Rolitetraacycline     | -4.474 | -4.694 |
| C18H20FN3O4     | DB01137 | Levofloxacin          | -3.473 | -4.694 |
| C18H20FN3O4     | DB01165 | Ofloxacin             | -3.473 | -4.694 |
| C25H24FNO4      | DB08860 | Pitavastatin          | -4.672 | -4.682 |
| C30H32N2O2      | DB01081 | Diphenoxylate         | -4.233 | -4.672 |
| C30H21I7N2Na2O8 | DB01583 | Liotrix               | -3.679 | -4.667 |
| C26H23FIN5O4    | DB08911 | Trametinib            | -4.665 | -4.665 |
| C24H40O4        | DB01586 | Ursodeoxycholic acid  | -4.661 | -4.665 |
| C16H18FN3O3     | DB01059 | Norfloracin           | -4.565 | -4.665 |
| C30H26F6N4O2    | DB01419 | Antrafenine           | -2.693 | -4.665 |
| C19H15NO6       | DB01418 | Acenocoumarol         | -4.643 | -4.663 |
| C26H30NO4S2     | DB08897 | Aclidinium            | -4.649 | -4.649 |
| C22H31NO3       | DB01062 | Oxybutynin            | -4.57  | -4.649 |
| C31H46O2        | DB01022 | Phylloquinone         | -4.648 | -4.648 |
| C16H14F3N3O2S   | DB05351 | Dexlansoprazole       | -2.615 | -4.648 |
| C9H11NO5        | DB06262 | Droxidopa             | -4.643 | -4.643 |
| C20H15Cl3N2OS   | DB01153 | Sertaconazole         | -4.023 | -4.638 |
| C21H32O2        | DB02789 | Pregnenolone          | -4.636 | -4.636 |
| C23H29N3O2S     | DB01063 | Acetophenazine        | -2.666 | -4.636 |
| C15H25N3O       | DB01255 | Lisdexamfetamine      | -4.54  | -4.635 |
| C20H21NO4       | DB01113 | Papaverine            | -4.534 | -4.626 |
| C21H24N4O2S     | DB08893 | Mirabegron            | -3.773 | -4.624 |
| C19H15NO6       | DB01418 | Acenocoumarol         | -2.621 | -4.619 |
| C23H33N2O       | DB01625 | Isopropamide          | -4.617 | -4.617 |
| C30H21I7N2Na2O8 | DB01583 | Liotrix               | -4.492 | -4.616 |
| C20H26N2O2      | DB01426 | Ajmaline              | -3.079 | -4.615 |
| C26H32F2O7      | DB01047 | Fluocinonide          | -4.614 | -4.614 |
| C15H24N4O6S2    | DB06211 | Doripenem             | -4.19  | -4.612 |
| C24H25ClFN5O3   | DB08916 | Afatinib              | -4.428 | -4.611 |
| C19H23N5O3      | DB01157 | Trimetrexate          | -4.577 | -4.61  |
| C31H44N2O5S     | DB04855 | Dronedarone           | -4.535 | -4.608 |
| C33H30N4O2      | DB00966 | Telmisartan           | -3.893 | -4.603 |
| C25H32O2        | DB04575 | Quinestrol            | -4.602 | -4.602 |
| C9H11NO4        | DB01235 | Levodopa              | -4.598 | -4.598 |
| C19H22F2N4O3    | DB01208 | Sparfloxacin          | -3.386 | -4.596 |
| C13H17N3O4S     | DB04817 | Metamizole            | -4.593 | -4.595 |

|                 |         |                           |        |        |
|-----------------|---------|---------------------------|--------|--------|
| C19H24N2OS      | DB01403 | Methotrimeprazine         | -4.593 | -4.594 |
| C19H20N2O3S     | DB01132 | Pioglitazone              | -2.715 | -4.59  |
| C27H34F2O7      | DB06781 | Difluprednate             | -4.58  | -4.58  |
| C19H24N2O4      | DB00983 | Formoterol                | -4.563 | -4.575 |
| C19H20CINO4     | DB01393 | Bezafibrate               | -4.574 | -4.574 |
| C25H34O6        | DB01222 | Budesonide                | -4.568 | -4.568 |
| C22H24CIN5O2    | DB01184 | Domperidone               | -4.547 | -4.564 |
| C39H43N3O11S    | DB05109 | Trabectedin               | -4.419 | -4.564 |
| C28H54N8        | DB06809 | Plerixafor                | -2.097 | -4.562 |
| C17H20O6        | DB01024 | Mycophenolic acid         | -2.8   | -4.56  |
| C19H28NO3       | DB00986 | Glycopyrronium            | -4.552 | -4.552 |
| C13H12N2O5S     | DB04743 | Nimesulide                | -3.805 | -4.547 |
| C29H39NO9       | DB04865 | Omacetaxine mepesuccinate | -3.501 | -4.539 |
| C15H23N3O4S     | DB01000 | Cyclacillin               | -4.448 | -4.528 |
| C24H31NO4       | DB06751 | Drotaverine               | -4.524 | -4.524 |
| C20H30O2        | DB06710 | Methyltestosterone        | -4.517 | -4.517 |
| C24H40N8O4      | DB00975 | Dipyridamole              | -4.513 | -4.513 |
| C22H18N4OS      | DB06626 | Axitinib                  | -4.507 | -4.51  |
| C16H24N2O2      | DB01618 | Molindone                 | -4.454 | -4.506 |
| C20H33N3O4      | DB04846 | Celiprolol                | -4.504 | -4.505 |
| C22H30MnN4O14P2 | DB06796 | Mangafodipir              | -2.155 | -4.504 |
| C17H25NO3       | DB01210 | Levobunolol               | -4.5   | -4.501 |
| C31H36N2O11     | DB01051 | Novobiocin                | -4.484 | -4.501 |
| C15H28N4O4      | DB06614 | Peramivir                 | -4.5   | -4.5   |
| C16H12O3        | DB01125 | Anisindione               | -4.488 | -4.5   |
| C17H20N2O6S     | DB01603 | Meticillin                | -4.499 | -4.499 |
| C24H26N2O4      | DB01136 | Carvedilol                | -2.921 | -4.496 |
| C17H25NO3       | DB00979 | Cyclopentolate            | -4.476 | -4.495 |
| C20H14O4        | DB04824 | Phenolphthalein           | -3.67  | -4.494 |
| C7H7NO2         | DB08797 | Salicylamide              | -2.846 | -4.493 |
| C9H13NO3        | DB06707 | Levonordefrin             | -2.398 | -4.492 |
| C26H29Cl2N5O3   | DB06616 | Bosutinib                 | -3.335 | -4.49  |
| C45H69N11O12S   | DB01282 | Carbetocin                | -4.489 | -4.489 |
| C16H20N6O       | DB08895 | Tofacitinib               | -2.146 | -4.487 |
| C19H18CIN3O5S   | DB01147 | Cloxacillin               | -4.481 | -4.481 |
| C37H41N2O6      | DB01199 | Tubocurarine              | -1.867 | -4.479 |
| C16H18FN3O2     | DB04953 | Ezogabine                 | -1.895 | -4.476 |
| C18H15Cl3N2S    | DB06820 | Sulconazole               | -3.971 | -4.473 |
| C12H12N2O2S     | DB04880 | Enoximone                 | -4.463 | -4.463 |
| C28H29F2N3O     | DB01100 | Pimozide                  | -1.807 | -4.452 |
| C23H22F7N4O6P   | DB06717 | Fosaprepitant             | -1.931 | -4.451 |
| C24H40O4        | DB06777 | Chenodeoxycholic acid     | -4.445 | -4.449 |
| C20H31NO4       | DB06217 | Vernakalant               | -1.721 | -4.447 |
| C14H10BrN3O     | DB01558 | Bromazepam                | -4.446 | -4.446 |
| C38H69NO13      | DB01211 | Clarithromycin            | -1.81  | -4.445 |
| C20H20N6O9S     | DB04570 | Latamoxef                 | -4.443 | -4.444 |
| C15H14FN3O3     | DB01205 | Flumazenil                | -4.441 | -4.442 |
| C28H24FN3O5     | DB08875 | Cabozantinib              | -2.885 | -4.435 |
| C19H21ClFN3O3   | DB06771 | Besifloxacin              | -4.368 | -4.434 |
| C26H37NO3       | DB06702 | Fesoterodine              | -4.425 | -4.427 |
| C21H23N3OS      | DB01608 | Periciazine               | -4.422 | -4.424 |
| C11H20N2O2      | DB05541 | Brivaracetam              | -4.419 | -4.419 |
| C15H22N2O       | DB04896 | Milnacipran               | -4.418 | -4.419 |
| C17H20BrNO      | DB01237 | Bromodiphenhydramine      | -4.401 | -4.415 |
| C27H33N3O8      | DB01301 | Rolitetracline            | -1.992 | -4.414 |
| C14H10O5        | DB01399 | Salsalate                 | -4.384 | -4.409 |
| C19H25NO2       | DB06152 | Nylidrin                  | -1.84  | -4.409 |
| C32H44O7        | DB01410 | Ciclesonide               | -4.404 | -4.404 |
| C22H18N2        | DB04794 | Bifonazole                | -3.901 | -4.398 |
| C10H14N2O5      | DB01265 | Telbivudine               | -4.393 | -4.394 |
| C20H21F3N4O     | DB04908 | Flibanserin               | -4.38  | -4.391 |
| C21H22Cl2FN5O   | DB08865 | Crizotinib                | -4.051 | -4.387 |
| C24H31NO        | DB05812 | Abiraterone               | -4.359 | -4.38  |

|                 |         |                         |        |        |
|-----------------|---------|-------------------------|--------|--------|
| C22H25CIN2OS    | DB01624 | Zuclopenthixol          | -4.151 | -4.378 |
| C28H35NO3       | DB08867 | Ulipristal              | -2.183 | -4.377 |
| C23H26CIN7O3    | DB06237 | Avanafil                | -2.093 | -4.377 |
| C14H22N6O5      | DB01610 | Valganciclovir          | -4.162 | -4.376 |
| C17H18N4O       | DB00969 | Alosetron               | -3.472 | -4.375 |
| H4O7P2          | DB04160 | Pyrophosphoric acid     | -2.038 | -4.375 |
| C28H29NO4S      | DB06249 | Arzoxifene              | -1.909 | -4.372 |
| C19H25NO2       | DB06152 | Nylidrin                | -4.36  | -4.368 |
| C28H22F3N7O     | DB04868 | Nilotinib               | -3.441 | -4.366 |
| C20H24N2        | DB08801 | Dimetindene             | -1.828 | -4.366 |
| C20H29FO3       | DB01185 | Fluoxymesterone         | -4.364 | -4.364 |
| C19H27NO3       | DB04844 | Tetrabenazine           | -2.868 | -4.363 |
| C16H26N2O5S     | DB01597 | Cilastatin              | -1.651 | -4.361 |
| C19H28O2        | DB01708 | Prasterone              | -4.36  | -4.36  |
| C18H15NO3       | DB00991 | Oxaprozin               | -4.357 | -4.359 |
| C17H26N4O       | DB01084 | Emedastine              | -3.787 | -4.358 |
| C22H30MnN4O14P2 | DB06796 | Mangafodipir            | -2.896 | -4.357 |
| C21H25NO3       | DB06230 | Nalmefene               | -1.8   | -4.356 |
| C14H12O3        | DB02709 | Resveratrol             | -4.352 | -4.352 |
| C14H10F3NO2     | DB02266 | Flufenamic Acid         | -4.351 | -4.352 |
| C22H27NO2       | DB01406 | Danazol                 | -4.351 | -4.351 |
| C18H28N2O       | DB01002 | Levobupivacaine         | -4.296 | -4.351 |
| C43H74N2O14     | DB06145 | Spiramycin              | -2.726 | -4.351 |
| C24H28N2O3      | DB05039 | Indacaterol             | -2.008 | -4.346 |
| C32H36N4O5      | DB01346 | Quinidine barbiturate   | -4.328 | -4.343 |
| C8H12N4O4       | DB01262 | Decitabine              | -3.922 | -4.341 |
| C21H15ClF4N4O3  | DB08896 | Regorafenib             | -4.34  | -4.34  |
| C21H32N2O       | DB06718 | Stanozolol              | -3.903 | -4.338 |
| C19H21NO4       | DB01183 | Naloxone                | -2.234 | -4.337 |
| C12H19N3O       | DB01168 | Procarbazine            | -3.824 | -4.334 |
| C35H38Cl2N8O4   | DB01167 | Itraconazole            | -2.357 | -4.329 |
| C17H14Cl2F2N2O3 | DB01656 | Roflumilast             | -4.327 | -4.327 |
| C37H41N2O6      | DB01199 | Tubocurarine            | -4.132 | -4.322 |
| C17H18N4O       | DB00969 | Alosetron               | -3.286 | -4.32  |
| C22H25CIN2OS    | DB01624 | Zuclopenthixol          | -2.819 | -4.32  |
| C16H13Cl2NO4    | DB06736 | Aceclofenac             | -4.318 | -4.318 |
| C33H38O6        | DB08909 | Glycerol phenylbutyrate | -4.317 | -4.317 |
| C22H38O5        | DB06826 | Unoprostone             | -4.314 | -4.317 |
| C11H16N2O       | DB01056 | Tocainide               | -4.159 | -4.317 |
| C12H6Cl4O2S     | DB04813 | Bithionol               | -2.764 | -4.314 |
| C15H16N2O6S2    | DB01607 | Ticarcillin             | -4.313 | -4.313 |
| C9H13N5O4       | DB01004 | Ganciclovir             | -4.312 | -4.312 |
| C16H24N2O2      | DB01618 | Molindone               | -2.847 | -4.312 |
| C17H19NO4       | DB01192 | Oxymorphone             | -3.227 | -4.31  |
| C23H27FN4O3     | DB01267 | Paliperidone            | -1.888 | -4.31  |
| C15H22FN3O6     | DB01101 | Capecitabine            | -4.308 | -4.308 |
| C22H32O2        | DB03756 | Doconexent              | -4.301 | -4.304 |
| C17H27N3O4S     | DB06288 | Amisulpride             | -4.302 | -4.303 |
| C28H44O3        | DB08804 | Nandrolone decanoate    | -4.302 | -4.302 |
| C19H25N5O4      | DB01162 | Terazosin               | -2.069 | -4.298 |
| C20H33NO3       | DB04822 | Oxeladin                | -1.651 | -4.295 |
| C21H26O2        | DB01357 | Mestranol               | -4.294 | -4.294 |
| C17H24O3        | DB04838 | Cyclandelate            | -4.292 | -4.293 |
| C37H41N2O6      | DB01199 | Tubocurarine            | -3.277 | -4.289 |
| C18H21N3O3S     | DB01129 | Rabeprazole             | -4.248 | -4.283 |
| C16H17BrN2      | DB04832 | Zimelidine              | -4.249 | -4.282 |
| C19H20N2O3S     | DB01132 | Pioglitazone            | -2.36  | -4.278 |
| C28H42Cl2N4O2   | DB01122 | Ambenonium              | -4.275 | -4.275 |
| C28H44O         | DB04038 | Ergosterol              | -4.271 | -4.271 |
| C14H20N2O2      | DB00960 | Pindolol                | -4.269 | -4.27  |
| C10H16N2O3      | DB01353 | Butobarbital            | -2.58  | -4.268 |
| C18H20FN5O4     | DB01155 | Gemifloxacin            | -4.221 | -4.262 |
| C22H24N2O7S     | DB05676 | Apremilast              | -4.261 | -4.261 |



|               |         |                      |        |        |
|---------------|---------|----------------------|--------|--------|
| C25H36N3O9PS  | DB01319 | Fosamprenavir        | -2.993 | -4.261 |
| C17H20CINO    | DB04837 | Clofedanol           | -4.256 | -4.26  |
| C14H12O3      | DB04571 | Trioxsalen           | -4.254 | -4.254 |
| C18H25N3O2    | DB06335 | Saxagliptin          | -3.212 | -4.253 |
| C16H17N3O7S2  | DB01331 | Cefoxitin            | -4.251 | -4.251 |
| C16H22N2O3    | DB01366 | Procaterol           | -2.388 | -4.249 |
| C15H25N3O     | DB01255 | Lisdexamfetamine     | -3.115 | -4.248 |
| C21H26NO4     | DB06800 | Methylnaltrexone     | -4.237 | -4.244 |
| C25H24FNO4    | DB08860 | Pitavastatin         | -1.788 | -4.244 |
| C22H28N2O2    | DB01228 | Encainide            | -4.239 | -4.24  |
| C17H27NO4     | DB01214 | Metipranolol         | -4.238 | -4.24  |
| C20H32F2O5    | DB01046 | Lubiprostone         | -4.236 | -4.239 |
| C16H17BrN2    | DB04832 | Zimelidine           | -2.512 | -4.232 |
| C17H20F6N2O3  | DB01195 | Flecainide           | -4.23  | -4.23  |
| C14H10N2O6    | DB01250 | Olsalazine           | -4.229 | -4.229 |
| C20H15Cl3N2OS | DB01153 | Sertaconazole        | -3.96  | -4.219 |
| C16H12ClNO3   | DB04812 | Benoxaprofen         | -4.213 | -4.214 |
| C16H14N2O4    | DB01025 | Amlexanox            | -2.095 | -4.209 |
| C24H25NO4     | DB01148 | Flavoxate            | -1.776 | -4.206 |
| C31H36N2O11   | DB01051 | Novobiocin           | -1.776 | -4.201 |
| C14H12O3      | DB01428 | Oxybenzone           | -4.163 | -4.198 |
| C34H50N4O9S   | DB01764 | Dalfopristin         | -3.539 | -4.197 |
| C16H21Cl2N3O2 | DB06769 | Bendamustine         | -3.748 | -4.192 |
| C20H21F3N4O   | DB04908 | Flibanserin          | -1.815 | -4.189 |
| C16H15N2O6P   | DB01320 | Fosphenytoin         | -2.652 | -4.186 |
| C19H23N3O2    | DB01253 | Ergometrine          | -3.932 | -4.185 |
| C17H25N3O2    | DB04876 | Vildagliptin         | -2.635 | -4.18  |
| C27H42N2O5S   | DB04845 | Ixabepilone          | -4.169 | -4.175 |
| C13H21O5P     | DB06716 | Fospropofol          | -4.117 | -4.175 |
| C39H43N3O11S  | DB05109 | Trabectedin          | -2.16  | -4.175 |
| C17H17Cl2N    | DB01104 | Sertraline           | -1.87  | -4.168 |
| C28H44O2      | DB06410 | Doxercalciferol      | -4.164 | -4.164 |
| C17H18N4O     | DB00969 | Alosetron            | -3.867 | -4.162 |
| C70H94N18O16  | DB06788 | Histrelin            | -2.779 | -4.162 |
| C16H14F3N3O2S | DB05351 | Dexlansoprazole      | -4.141 | -4.161 |
| C34H41N7O5    | DB06695 | Dabigatran etexilate | -2.69  | -4.161 |
| C18H15Cl3N2O  | DB01127 | Econazole            | -3.951 | -4.158 |
| C5H15N2O3PS   | DB01143 | Amifostine           | -2.533 | -4.158 |
| C23H29N3O2S   | DB01063 | Acetophenazine       | -3.819 | -4.155 |
| C19H21ClFN3O3 | DB06771 | Besifloxacin         | -2.819 | -4.152 |
| C11H6ClN3O6   | DB06794 | Lodoxamide           | -4.149 | -4.149 |
| C15H9FN2O3    | DB05016 | Ataluren             | -4.147 | -4.147 |
| C17H19F2N3O3  | DB00978 | Lomefloxacin         | -4.076 | -4.146 |
| C14H22ClN3O2  | DB01233 | Metoclopramide       | -4.139 | -4.143 |
| C28H28N2O2    | DB01501 | Difenoxin            | -1.974 | -4.142 |
| C15H14N2O2    | DB06802 | Nepafenac            | -4.139 | -4.139 |
| C27H29F3O6S   | DB08906 | Fluticasone furoate  | -4.138 | -4.138 |
| C27H36O8      | DB01130 | Prednicarbate        | -4.131 | -4.131 |
| C13H16N2O2    | DB01065 | Melatonin            | -4.125 | -4.125 |
| C23H26ClN7O3  | DB06237 | Avanafil             | -2.227 | -4.124 |
| C10H8F2N4O    | DB06201 | Rufinamide           | -4.12  | -4.12  |
| C9H7N7O2S     | DB00993 | Azathioprine         | -3.594 | -4.12  |
| C37H42F2N8O4  | DB01263 | Posaconazole         | -4.101 | -4.119 |
| C70H94N18O16  | DB06788 | Histrelin            | -2.136 | -4.117 |
| C31H48O2S2    | DB01599 | Probucol             | -4.115 | -4.115 |
| C13H18ClNO    | DB01156 | Bupropion            | -3.458 | -4.115 |
| C13H16ClNO    | DB01221 | Ketamine             | -3.033 | -4.114 |
| C26H28Cl2N4O4 | DB01026 | Ketoconazole         | -1.414 | -4.113 |
| C18H19Cl2NO4  | DB01023 | Felodipine           | -4.109 | -4.109 |
| C13H15NO2     | DB01437 | Glutethimide         | -4.109 | -4.109 |
| C18H15Cl3N2O  | DB01127 | Econazole            | -3.386 | -4.109 |
| C23H23N3O5    | DB01030 | Topotecan            | -3.276 | -4.108 |
| C12H18Cl2N2O  | DB01407 | Clenbuterol          | -4.104 | -4.105 |

|                 |         |                         |        |        |
|-----------------|---------|-------------------------|--------|--------|
| C16H22N2O3      | DB01366 | Procaterol              | -4.077 | -4.103 |
| C43H65N5O10     | DB00976 | Telithromycin           | -3.52  | -4.102 |
| C12H12N2O3      | DB01174 | Phenobarbital           | -3.276 | -4.097 |
| C23H22F7N4O6P   | DB06717 | Fosaprepitant           | -3.681 | -4.093 |
| C25H28N6O       | DB01029 | Irbesartan              | -4.083 | -4.089 |
| C15H10ClN3O3    | DB01068 | Clonazepam              | -4.087 | -4.087 |
| C16H12O3        | DB01125 | Anisindione             | -1.745 | -4.087 |
| C17H26ClN       | DB01105 | Sibutramine             | -4.084 | -4.085 |
| C9H5Cl2NO       | DB01243 | Chloroxine              | -3.137 | -4.085 |
| C13H17ClN2O2    | DB01171 | Moclobemide             | -3.894 | -4.083 |
| C10H12N4O5S     | DB01606 | Tazobactam              | -4.081 | -4.081 |
| C18H23NO        | DB01173 | Orphenadrine            | -4.066 | -4.079 |
| C17H18N2O6      | DB01115 | Nifedipine              | -4.073 | -4.073 |
| C21H25ClN2O3    | DB06282 | Levocetirizine          | -3.6   | -4.065 |
| C20H21ClO4      | DB01039 | Fenofibrate             | -4.063 | -4.063 |
| C23H16O11       | DB01003 | Cromoglicic acid        | -4.063 | -4.063 |
| C18H23NO3       | DB01551 | Dihydrocodeine          | -4.048 | -4.063 |
| H4O7P2          | DB04160 | Pyrophosphoric acid     | -3.828 | -4.061 |
| C29H27F3N6O     | DB08901 | Ponatinib               | -3.852 | -4.059 |
| C7H15Cl2N2O2P   | DB01181 | Ifosfamide              | -4.058 | -4.058 |
| C13H17N3O       | DB01424 | Aminophenazone          | -3.995 | -4.057 |
| C18H14Cl4N2O    | DB01110 | Miconazole              | -3.334 | -4.057 |
| C21H27N3O7S     | DB01602 | Bacampicillin           | -3.332 | -4.057 |
| C21H23NO5       | DB01452 | Diamorphine             | -3.983 | -4.047 |
| C15H10O2        | DB07776 | Flavone                 | -4.046 | -4.046 |
| C13H12N2O5S     | DB04743 | Nimesulide              | -3.845 | -4.044 |
| C22H23NO7       | DB06174 | Noscapine               | -3.206 | -4.038 |
| C14H14N2O       | DB01011 | Metirapone              | -4.032 | -4.037 |
| C19H21NO        | DB01142 | Doxepin                 | -4.033 | -4.036 |
| C17H25NO3       | DB00979 | Cyclopentolate          | -2.011 | -4.035 |
| C21H25N3O2S     | DB01224 | Quetiapine              | -3.944 | -4.033 |
| C22H30MnN4O14P2 | DB06796 | Mangafodipir            | -3.008 | -4.032 |
| C16H14O3        | DB01009 | Ketoprofen              | -4.03  | -4.031 |
| C12H19N3O       | DB01168 | Procarbazine            | -3.346 | -4.031 |
| C15H18N2O       | DB04864 | Huperzine A             | -2.912 | -4.031 |
| C13H8Cl2N2O4    | DB06803 | Niclosamide             | -2.703 | -4.031 |
| C24H32O6        | DB01260 | Desonide                | -4.028 | -4.028 |
| C16H21NO2       | DB00980 | Ramelteon               | -4.028 | -4.028 |
| C23H15N3O       | DB08883 | Perampanel              | -4.028 | -4.028 |
| C53H67N9O10S    | DB01369 | Quinupristin            | -3.555 | -4.028 |
| C10H20N2O4      | DB06797 | Mebutamate              | -4.027 | -4.027 |
| C28H54N8        | DB06809 | Plerixafor              | -3.32  | -4.027 |
| C19H26N2S       | DB01186 | Pergolide               | -1.677 | -4.017 |
| C19H23ClN2      | DB01242 | Clomipramine            | -4.014 | -4.014 |
| C13H18N2O3      | DB06218 | Lacosamide              | -4.013 | -4.013 |
| C15H11N3O3      | DB01595 | Nitrazepam              | -4.013 | -4.013 |
| C15H23NO3       | DB01580 | Oxprenolol              | -4.011 | -4.013 |
| C21H32N2O       | DB06718 | Stanozolol              | -3.616 | -4.006 |
| C24H26FNO4      | DB01095 | Fluvastatin             | -4.002 | -4.004 |
| C17H15N5O       | DB00962 | Zaleplon                | -3.999 | -3.999 |
| C37H41N2O6      | DB01199 | Tubocurarine            | -2.204 | -3.995 |
| C25H36N6O4S     | DB06267 | Udenafil                | -3.986 | -3.991 |
| C18H25N3O2      | DB06335 | Saxagliptin             | -3.877 | -3.99  |
| C6H10N2O5       | DB06775 | Carglumic acid          | -3.989 | -3.989 |
| C25H32ClFO5     | DB01013 | Clobetasol propionate   | -3.983 | -3.983 |
| C13H21NO3       | DB01001 | Salbutamol              | -3.979 | -3.979 |
| C38H52N6O7      | DB01072 | Atazanavir              | -3.97  | -3.978 |
| C26H44O4        | DB05990 | Obeticholic acid        | -3.971 | -3.976 |
| C18H22O5S       | DB04574 | Estrone sulfate         | -3.975 | -3.975 |
| C20H33NO3       | DB04822 | Oxeladin                | -3.968 | -3.974 |
| C11H18N2O3      | DB01351 | Amobarbital             | -2.255 | -3.969 |
| C22H32O3        | DB01420 | Testosterone propionate | -3.962 | -3.962 |
| C62H86N12O16    | DB00970 | Dactinomycin            | -3.96  | -3.96  |

|                   |         |                        |        |        |
|-------------------|---------|------------------------|--------|--------|
| C36H53N7O6        | DB05521 | Telaprevir             | -3.959 | -3.959 |
| C20H21FN2O        | DB01175 | Escitalopram           | -3.956 | -3.958 |
| C26H27N5O2        | DB06684 | Vilazodone             | -2.862 | -3.957 |
| C25H22N4O4        | DB06210 | Eltrombopag            | -3.951 | -3.956 |
| C21H27NO          | DB01231 | Diphenidol             | -3.954 | -3.955 |
| C11H12N2O3        | DB02959 | Oxtripitan             | -3.954 | -3.954 |
| C19H18N2O4S       | DB08439 | Parecoxib              | -1.838 | -3.951 |
| C8H14N2O2         | DB01202 | Levetiracetam          | -3.95  | -3.95  |
| C24H29ClO4        | DB04839 | Cyproterone acetate    | -3.948 | -3.948 |
| C12H9F3N2O2       | DB08880 | Teriflunomide          | -3.943 | -3.948 |
| C24H28ClN5O3      | DB00985 | Dimenhydrinate         | -1.71  | -3.947 |
| C21H27N3O7S       | DB01602 | Bacampicillin          | -3.739 | -3.946 |
| C70H94N18O16      | DB06788 | Histrelin              | -2.644 | -3.945 |
| C17H17N7O8S4      | DB01330 | Cefotetan              | -3.941 | -3.941 |
| C6H13NO4          | DB05018 | Migalastat             | -3.938 | -3.941 |
| C9H9Cl2N3O        | DB01018 | Guanfacine             | -3.939 | -3.939 |
| C15H12BrNO3       | DB00963 | Bromfenac              | -3.936 | -3.937 |
| C22H18N2          | DB04794 | Bifonazole             | -3.599 | -3.934 |
| C18H15ClN2O2S     | DB01628 | Etoricoxib             | -3.933 | -3.933 |
| C18H20FN3O4       | DB01137 | Levofloxacin           | -3.789 | -3.932 |
| C18H20FN3O4       | DB01165 | Ofloxacin              | -3.789 | -3.932 |
| C14H12F3N3O5      | DB05154 | Pretomanid             | -3.929 | -3.929 |
| C20H33N2O         | DB06787 | Hexocyclium            | -3.878 | -3.926 |
| C12H14N4O4S       | DB01299 | Sulfadoxine            | -2.829 | -3.918 |
| C16H25NO2         | DB06700 | Desvenlafaxine         | -3.917 | -3.917 |
| C19H19N           | DB01619 | Phenindamine           | -3.434 | -3.917 |
| C22H18N6          | DB08864 | Rilpivirine            | -3.913 | -3.913 |
| C9H5ClINO         | DB04815 | Clioquinol             | -3.122 | -3.912 |
| C9H17NO5          | DB01783 | Pantothenic acid       | -3.91  | -3.911 |
| C12H19N3O         | DB01168 | Procarbazine           | -3.118 | -3.911 |
| C26H28Cl2N4O4     | DB01026 | Ketoconazole           | -3.359 | -3.908 |
| C24H25ClFN5O3     | DB08916 | Afatinib               | -3.003 | -3.905 |
| C16H12FN3O3       | DB01544 | Flunitrazepam          | -3.903 | -3.903 |
| C30H62O10         | DB06811 | Polidocanol            | -3.899 | -3.899 |
| C8H10IN3          | DB06704 | Iobenguane             | -3.896 | -3.896 |
| C23H28ClN3O5S     | DB01016 | Glyburide              | -1.913 | -3.896 |
| C18H23FINO2       | DB08824 | Ioflupane I-123        | -3.881 | -3.895 |
| C15H22N2O         | DB00961 | Mepivacaine            | -3.798 | -3.893 |
| C14H21N3O3        | DB01096 | Oxamniquine            | -3.891 | -3.891 |
| C12H12N2O3        | DB01174 | Phenobarbital          | -3.721 | -3.891 |
| C14H10O5          | DB01399 | Salsalate              | -1.993 | -3.887 |
| C43H65N5O10       | DB00976 | Telithromycin          | -3.609 | -3.886 |
| C31H36N2O11       | DB01051 | Novobiocin             | -1.188 | -3.886 |
| C16H15N2O6P       | DB01320 | Fosphenytoin           | -3.835 | -3.884 |
| C30H24N4O8        | DB08822 | Azilsartan medoxomil   | -3.881 | -3.881 |
| C26H28Cl2N4O4     | DB01026 | Ketoconazole           | -1.405 | -3.88  |
| C37H48N4O5        | DB01601 | Lopinavir              | -3.877 | -3.877 |
| C9H23NO3PS        | DB01057 | Echothiophate          | -3.876 | -3.876 |
| C18H23FINO2       | DB08824 | Ioflupane I-123        | -1.638 | -3.875 |
| C23H31NO3         | DB00957 | Norgestimate           | -3.873 | -3.873 |
| C11H16N2O         | DB01056 | Tocainide              | -3.012 | -3.873 |
| C16H18N2          | DB04821 | Nomifensine            | -1.942 | -3.873 |
| C17H20BrNO        | DB01237 | Bromodiphenhydramine   | -1.647 | -3.872 |
| C24H30O3          | DB01395 | Drospirenone           | -3.87  | -3.87  |
| C22H34O2          | DB08887 | Icosapent ethyl        | -3.869 | -3.869 |
| C33H38GdN3Na3O14P | DB06705 | Gadofosveset trisodium | -3.77  | -3.862 |
| CHNaO3            | DB01390 | Sodium bicarbonate     | -2.815 | -3.858 |
| CCaO3             | DB06724 | Calcium Carbonate      | -2.815 | -3.858 |
| C3La2O9           | DB06792 | Lanthanum carbonate    | -2.815 | -3.858 |
| C16H26O5          | DB06697 | Artemether             | -3.852 | -3.852 |
| C19H19N           | DB01619 | Phenindamine           | -2.058 | -3.852 |
| C32H31BrN2O2      | DB08903 | Bedaquiline            | -3.846 | -3.85  |
| C25H28N6O         | DB01029 | Irbesartan             | -1.14  | -3.848 |

|                   |         |                              |        |        |
|-------------------|---------|------------------------------|--------|--------|
| C22H25CIN2OS      | DB01624 | Zuclopenthixol               | -2.999 | -3.846 |
| C29H27F3N6O       | DB08901 | Ponatinib                    | -3.085 | -3.84  |
| C18H28N2O         | DB01002 | Levobupivacaine              | -2.399 | -3.84  |
| C19H26O3          | DB08905 | Formestane                   | -3.838 | -3.838 |
| C23H36N2O2        | DB01216 | Finasteride                  | -3.835 | -3.835 |
| C19H27NO3         | DB04844 | Tetrabenazine                | -3.784 | -3.834 |
| C8H11NO2          | DB00988 | Dopamine                     | -3.828 | -3.828 |
| C17H21NO          | DB01075 | Diphenhydramine              | -3.81  | -3.823 |
| C10H12CIN3O3S     | DB01325 | Quinethazone                 | -3.82  | -3.822 |
| C12H20N2O3        | DB01291 | Pirbuterol                   | -1.997 | -3.822 |
| C21H26NO3         | DB04843 | Mepenzolate                  | -3.82  | -3.82  |
| C27H40O4          | DB06789 | Hydroxyprogesterone caproate | -3.819 | -3.819 |
| C12H20N2O3        | DB01291 | Pirbuterol                   | -3.451 | -3.814 |
| C13H17CIN2O2      | DB01171 | Moclobemide                  | -3.039 | -3.809 |
| C23H32O4          | DB06780 | Desoxycorticosterone acetate | -3.806 | -3.806 |
| C15H22O3          | DB01241 | Gemfibrozil                  | -3.803 | -3.806 |
| C18H15Cl3N2S      | DB06820 | Sulconazole                  | -3.473 | -3.804 |
| C20H14O4          | DB04824 | Phenolphthalein              | -3.627 | -3.796 |
| C33H38GdN3Na3O14P | DB06705 | Gadofosveset trisodium       | -2.402 | -3.794 |
| C18H21N5O2        | DB06203 | Alogliptin                   | -3.789 | -3.789 |
| C23H27N           | DB01091 | Butenafine                   | -2.841 | -3.789 |
| C33H35FN2O5       | DB01076 | Atorvastatin                 | -3.783 | -3.785 |
| C19H29IO2         | DB01187 | Iophendylate                 | -3.781 | -3.781 |
| C20H27NO3         | DB01108 | Trilostane                   | -3.778 | -3.778 |
| C15H13ClFNO2      | DB01283 | Lumiracoxib                  | -3.776 | -3.777 |
| C5H9NO3S          | DB06151 | Acetylcysteine               | -3.776 | -3.776 |
| C19H22FN3O4       | DB01044 | Gatifloxacin                 | -3.684 | -3.776 |
| C15H22N2O         | DB00961 | Mepivacaine                  | -2.642 | -3.774 |
| C22H29N3O6S       | DB01604 | Pivampicillin                | -3.048 | -3.769 |
| C10H13N3          | DB04840 | Debrisoquine                 | -3.768 | -3.768 |
| C39H37F6N3O2      | DB08827 | Lomitapide                   | -3.763 | -3.766 |
| C20H24N2          | DB08801 | Dimetindene                  | -1.862 | -3.766 |
| C16H18FN3O2       | DB04953 | Ezogabine                    | -3.756 | -3.765 |
| C10H7F3O4         | DB08814 | Triflusal                    | -3.764 | -3.764 |
| C15H18N2O         | DB04864 | Huperzine A                  | -3.659 | -3.756 |
| C18H26CIN3O3      | DB06480 | Prucalopride                 | -1.043 | -3.755 |
| C16H18N2          | DB04821 | Nomifensine                  | -3.728 | -3.751 |
| C18H15CIN2O6S2    | DB06268 | Sitaxentan                   | -3.749 | -3.749 |
| C13H11N3          | DB01123 | Proflavine                   | -3.718 | -3.749 |
| C22H29N3O6S       | DB01604 | Pivampicillin                | -3.541 | -3.749 |
| C12H14N4O4S       | DB06150 | Sulfadimethoxine             | -2.666 | -3.739 |
| C17H11N5          | DB01006 | Letrozole                    | -3.737 | -3.737 |
| C17H19N3          | DB08799 | Antazoline                   | -3.733 | -3.734 |
| C31H44N2O5S       | DB04855 | Dronedarone                  | -2.45  | -3.733 |
| C21H16F4N4O2S     | DB08899 | Enzalutamide                 | -3.732 | -3.732 |
| C11H16N2O2        | DB01085 | Pilocarpine                  | -2.977 | -3.732 |
| C27H34O3          | DB00984 | Nandrolone phenpropionate    | -3.73  | -3.73  |
| C16H13Cl3N2OS     | DB01007 | Tioconazole                  | -3.463 | -3.722 |
| C37H41N2O6        | DB01199 | Tubocurarine                 | -1.547 | -3.721 |
| C30H26F6N4O2      | DB01419 | Antrafenine                  | -3.122 | -3.719 |
| C24H28N2O3        | DB08820 | Ivacaftor                    | -3.718 | -3.718 |
| C19H19CIN2        | DB00967 | Desloratadine                | -3.714 | -3.715 |
| C13H10CIN3O4S2    | DB06725 | Lornoxicam                   | -3.713 | -3.715 |
| C28H54N8          | DB06809 | Plerixafor                   | -1.565 | -3.71  |
| C17H21NO          | DB01075 | Diphenhydramine              | -1.469 | -3.707 |
| C22H23NO7         | DB06174 | Noscapine                    | -3.538 | -3.705 |
| C13H18Cl2N2O2     | DB01042 | Melphalan                    | -3.703 | -3.703 |
| C21H26N2O3        | DB01392 | Yohimbine                    | -3.678 | -3.702 |
| C18H14Cl4N2O      | DB01110 | Miconazole                   | -3.492 | -3.699 |
| C25H34FN3O2       | DB05316 | Pimavanserin                 | -3.694 | -3.697 |
| C14H17N3O         | DB00998 | Frovatriptan                 | -3.696 | -3.696 |
| C6H9NO6           | DB01020 | Isosorbide Mononitrate       | -3.695 | -3.695 |
| C18H20FN3O4       | DB01137 | Levofloxacin                 | -2.15  | -3.691 |

|                |         |                    |        |        |
|----------------|---------|--------------------|--------|--------|
| C18H20FN3O4    | DB01165 | Ofloxacin          | -2.15  | -3.691 |
| C12H6Cl4O2S    | DB04813 | Bithionol          | -3.159 | -3.69  |
| C18H22N2       | DB01151 | Desipramine        | -3.687 | -3.687 |
| C6H6N2O        | DB02701 | Nicotinamide       | -3.685 | -3.685 |
| C21H26NO4      | DB06800 | Methylnaltrexone   | -1.119 | -3.684 |
| C18H22N2S      | DB01246 | Alimemazine        | -3.682 | -3.683 |
| C6H12F2N2O2    | DB06243 | Eflornithine       | -3.402 | -3.682 |
| C22H22F3N      | DB01012 | Cinacalcet         | -3.667 | -3.678 |
| C12H13N3O2     | DB01247 | Isocarboxazid      | -3.677 | -3.677 |
| C16H15F6N5O    | DB01261 | Sitagliptin        | -3.672 | -3.675 |
| C12H14N4O3S    | DB01298 | Sulfacytine        | -3.636 | -3.674 |
| C20H24N2       | DB08801 | Dimetindene        | -3.288 | -3.674 |
| C35H38Cl2N8O4  | DB01167 | Itraconazole       | -3.651 | -3.672 |
| C19H21N3O      | DB06766 | Alcaftadine        | -3.66  | -3.669 |
| C28H35NO3      | DB08867 | Ulipristal         | -3.653 | -3.668 |
| C15H14N2O4S    | DB05015 | Belinostat         | -3.645 | -3.667 |
| C18H23NO       | DB01173 | Orphenadrine       | -1.428 | -3.665 |
| C24H28ClN5O3   | DB00985 | Dimenhydrinate     | -3.65  | -3.664 |
| C6H12F2N2O2    | DB06243 | Eflornithine       | -3.084 | -3.663 |
| C15H14N2O4S    | DB05015 | Belinostat         | -1.127 | -3.659 |
| C10H16N2O8     | DB00974 | Edetic Acid        | -3.643 | -3.657 |
| C23H31NO2      | DB01227 | Levacetylmethadol  | -3.652 | -3.656 |
| C24H26ClFN4O   | DB06144 | Sertindole         | -3.648 | -3.653 |
| C11H12Cl2N2O   | DB04948 | Lofexidine         | -3.649 | -3.651 |
| C29H27F3N6O    | DB08901 | Ponatinib          | -1.148 | -3.651 |
| C28H54N8       | DB06809 | Plerixafor         | -2.175 | -3.65  |
| C20H24O2       | DB00990 | Exemestane         | -3.647 | -3.647 |
| C12H11NO       | DB04951 | Pirfenidone        | -3.646 | -3.646 |
| C20H26N2O2     | DB01426 | Ajmaline           | -3.215 | -3.642 |
| C16H16N2O3S    | DB04854 | Febuxostat         | -3.636 | -3.637 |
| C12H14N4O2S    | DB01582 | Sulfamethazine     | -3.325 | -3.637 |
| C12H14N4O4S    | DB06150 | Sulfadimethoxine   | -1.751 | -3.635 |
| C10H15NO       | DB01364 | Ephedrine          | -3.626 | -3.632 |
| C24H25NO4      | DB01148 | Flavoxate          | -3.621 | -3.631 |
| C7H10N2O2S     | DB06795 | Mafenide           | -1.842 | -3.631 |
| C59H79N15O21S6 | DB08890 | Linaclotide        | -3.319 | -3.629 |
| C10H14O        | DB02513 | Thymol             | -3.626 | -3.626 |
| C10H9N3O       | DB01427 | Amrinone           | -3.625 | -3.625 |
| C13H18Br2N2O   | DB06742 | Ambroxol           | -3.613 | -3.623 |
| C14H10N4O5     | DB01219 | Dantrolene         | -3.55  | -3.622 |
| C18H26ClN3O    | DB01611 | Hydroxychloroquine | -1.381 | -3.622 |
| C29H41F2N5O    | DB04835 | Maraviroc          | -3.616 | -3.616 |
| C20H23N5O6S    | DB01061 | Azlocillin         | -3.612 | -3.612 |
| C40H59NO11     | DB08871 | Eribulin           | -1.036 | -3.607 |
| C38H47N5O7S2   | DB06290 | Simeprevir         | -0.935 | -3.606 |
| C2H4Cl3O4P     | DB06753 | Triclofos          | -2.259 | -3.604 |
| C13H15N3O4S    | DB01382 | Glymidine          | -3.155 | -3.6   |
| C43H74N2O14    | DB06145 | Spiramycin         | -3.55  | -3.599 |
| C15H14N4O2S    | DB06729 | Sulfaphenazole     | -2.139 | -3.598 |
| C29H26ClFN4O4S | DB01259 | Lapatinib          | -3.506 | -3.595 |
| C30H26F6N4O2   | DB01419 | Antrafenine        | -3.235 | -3.594 |
| C19H18ClN3O5S  | DB06228 | Rivaroxaban        | -3.589 | -3.589 |
| C15H18Cl6N2O5  | DB01495 | Dichloralphenazone | -3.587 | -3.587 |
| C11H12N2O      | DB01435 | Antipyrine         | -3.582 | -3.582 |
| C12H14N4O2S    | DB01582 | Sulfamethazine     | -2.904 | -3.58  |
| C16H20N2       | DB01620 | Pheniramine        | -3.578 | -3.578 |
| C13H18O2       | DB01050 | Ibuprofen          | -3.575 | -3.576 |
| C14H12O3S      | DB01600 | Tiaprofenic acid   | -3.574 | -3.574 |
| C32H38N2O8     | DB01089 | Deserpidine        | -3.538 | -3.571 |
| C17H19NO4      | DB01192 | Oxymorphone        | -1.291 | -3.565 |
| C9H10N2O2      | DB01121 | Phenacemide        | -3.562 | -3.562 |
| C20H20FNO3S    | DB06209 | Prasugrel          | -2.88  | -3.56  |
| C23H23N3O5     | DB01030 | Topotecan          | -3.282 | -3.55  |

|                 |         |                      |        |        |
|-----------------|---------|----------------------|--------|--------|
| C21H25CIN2O3    | DB06282 | Levocetirizine       | -1.688 | -3.547 |
| C30H47NO4S      | DB01256 | Retapamulin          | -3.543 | -3.545 |
| C7H9NO2         | DB08826 | Deferiprone          | -3.541 | -3.541 |
| C20H33N2O       | DB06787 | Hexocyclium          | -2.035 | -3.539 |
| C26H29Cl2N5O3   | DB06616 | Bosutinib            | -1.484 | -3.533 |
| C37H42F2N8O4    | DB01263 | Posaconazole         | -1.442 | -3.531 |
| C11H18N2O3      | DB01351 | Amobarbital          | -3.495 | -3.529 |
| C17H19N5        | DB01217 | Anastrozole          | -3.524 | -3.524 |
| C22H22F3N       | DB01012 | Cinacalcet           | -1.155 | -3.523 |
| C6H18N4         | DB06824 | Triethylenetetramine | -1.802 | -3.521 |
| C13H19CIN2O2    | DB01161 | Chloroprocaine       | -1.535 | -3.521 |
| C23H26N2O2      | DB01591 | Solifenacin          | -3.513 | -3.516 |
| C17H18N2O5S     | DB02925 | Piretanide           | -3.513 | -3.513 |
| C24H26N2O4      | DB01136 | Carvedilol           | -3.467 | -3.51  |
| C54H69N11O10S2  | DB06791 | Lanreotide           | -3.297 | -3.51  |
| C6H6Cl2N2O4S2   | DB01144 | Diclofenamide        | -0.899 | -3.509 |
| C18H20N2O6      | DB01054 | Nitrendipine         | -3.507 | -3.507 |
| C16H15CIN2OS    | DB01559 | Clotiazepam          | -3.506 | -3.507 |
| C23H30GdN3O11   | DB08884 | Gadoxetic acid       | -1.05  | -3.506 |
| C7H7NO2         | DB02362 | Aminobenzoic acid    | -3.5   | -3.502 |
| C16H18N4O2      | DB04820 | Nialamide            | -3.501 | -3.501 |
| C9H8N2O2        | DB01230 | Pemoline             | -3.496 | -3.499 |
| C16H24N10O4     | DB01223 | Aminophylline        | -3.466 | -3.498 |
| C23H22F7N4O6P   | DB06717 | Fosaprepitant        | -1.011 | -3.497 |
| C19H19N         | DB01619 | Phenindamine         | -1.674 | -3.495 |
| C16H13Cl3N2OS   | DB01007 | Tioconazole          | -2.879 | -3.494 |
| C24H32ClFO5     | DB06786 | Halcinonide          | -3.492 | -3.492 |
| C23H29N3O2S2    | DB01623 | Thiothixene          | -2.233 | -3.491 |
| C13H16CINO      | DB01221 | Ketamine             | -3.383 | -3.487 |
| C40H57N5O7      | DB08889 | Carfilzomib          | -3.481 | -3.484 |
| C12H21N3O5S3    | DB01194 | Brinzolamide         | -1.162 | -3.478 |
| C19H19N3O6      | DB06712 | Nilvadipine          | -3.475 | -3.476 |
| C22H30MnN4O14P2 | DB06796 | Mangafodipir         | -1.342 | -3.476 |
| C5H9NO4S        | DB04339 | Carbocisteine        | -3.468 | -3.475 |
| C16H11CIN4      | DB01215 | Estazolam            | -3.473 | -3.473 |
| C21H21F3IN3O2   | DB05239 | Cobimetinib          | -3.47  | -3.472 |
| C9H5Cl2NO       | DB01243 | Chloroxine           | -3.336 | -3.469 |
| C12H7Cl3O2      | DB08604 | Triclosan            | -3.175 | -3.467 |
| C21H29NO2       | DB06713 | Norelgestromin       | -3.464 | -3.464 |
| C12H20N2O3      | DB01291 | Pirbuterol           | -2.937 | -3.462 |
| C18H20N2        | DB06148 | Mianserin            | -2.573 | -3.459 |
| C14H19NO2       | DB06701 | Dexmethylphenidate   | -3.457 | -3.457 |
| C23H31Cl2NO3    | DB01196 | Estramustine         | -3.455 | -3.455 |
| C10H15NO        | DB01364 | Ephedrine            | -0.793 | -3.455 |
| C28H54N8        | DB06809 | Plerixafor           | -1.319 | -3.452 |
| C34H41N7O5      | DB06695 | Dabigatran etexilate | -2.714 | -3.449 |
| C34H41N7O5      | DB06695 | Dabigatran etexilate | -2.795 | -3.442 |
| C9H5ClINO       | DB04815 | Clioquinol           | -3.255 | -3.437 |
| C9H15NO3S       | DB01197 | Captopril            | -3.435 | -3.435 |
| C38H47N5O7S2    | DB06290 | Simeprevir           | -3.427 | -3.434 |
| C20H27N5O2      | DB01166 | Cilostazol           | -3.432 | -3.432 |
| C16H26N2O5S     | DB01597 | Cilastatin           | -3.426 | -3.432 |
| C22H30MnN4O14P2 | DB06796 | Mangafodipir         | -1.008 | -3.432 |
| H4O7P2          | DB04160 | Pyrophosphoric acid  | -2.727 | -3.428 |
| C21H20CINO5     | DB06216 | Asenapine            | -3.423 | -3.427 |
| C10H22N4        | DB01170 | Guanethidine         | -1.463 | -3.426 |
| C23H18ClF2N3O3S | DB08881 | Vemurafenib          | -3.043 | -3.423 |
| C13H18Br2N2O    | DB06742 | Ambroxol             | -1.015 | -3.421 |
| C22H30MnN4O14P2 | DB06796 | Mangafodipir         | -0.977 | -3.421 |
| C10H17NO2       | DB01107 | Methyprylon          | -3.419 | -3.419 |
| C22H27FN4O2     | DB01268 | Sunitinib            | -3.415 | -3.419 |
| C23H28F2N6O4S   | DB08816 | Ticagrelor           | -0.879 | -3.416 |
| C10H16N2O8      | DB00974 | Edetic Acid          | -1.2   | -3.414 |

|                  |         |                       |        |        |
|------------------|---------|-----------------------|--------|--------|
| C19H21N3O        | DB06766 | Alcaftadine           | -0.892 | -3.41  |
| C29H26ClFN4O4S   | DB01259 | Lapatinib             | -2.239 | -3.408 |
| C11H16ClN5       | DB01131 | Proguanil             | -2.327 | -3.405 |
| C22H30MnN4O14P2  | DB06796 | Mangafodipir          | -1.494 | -3.402 |
| C11H13ClF3N3O4S3 | DB01324 | Polythiazide          | -3.398 | -3.401 |
| C3H7NO3          | DB03929 | D-Serine              | -3.4   | -3.4   |
| C12H17NO         | DB01579 | Phendimetrazine       | -2.694 | -3.4   |
| C26H28Cl2N4O4    | DB01026 | Ketoconazole          | -3.074 | -3.398 |
| C12H14N4O3S      | DB01298 | Sulfacytine           | -1.735 | -3.389 |
| C17H17Cl2N       | DB01104 | Sertraline            | -3.373 | -3.386 |
| C14H16O3         | DB01322 | Kava                  | -3.385 | -3.385 |
| C11H12N4O2S      | DB01581 | Sulfamerazine         | -3.16  | -3.382 |
| C12H18N2O2S      | DB01154 | Thiamylal             | -3.332 | -3.372 |
| C27H33N3O6S      | DB01251 | Gliquidone            | -1.263 | -3.369 |
| C16H18N2O4S      | DB01053 | Benzylpenicillin      | -3.365 | -3.365 |
| C22H30MnN4O14P2  | DB06796 | Mangafodipir          | -2.34  | -3.364 |
| C9H16ClN3O2      | DB01206 | Lomustine             | -3.36  | -3.36  |
| C8H11NO4S2       | DB05057 | Erdosteine            | -3.356 | -3.356 |
| C20H28O2         | DB00982 | Isotretinoin          | -3.345 | -3.349 |
| C13H17N3O        | DB01424 | Aminophenazone        | -1.981 | -3.348 |
| C12H14N4O4S      | DB06150 | Sulfadimethoxine      | -3.21  | -3.346 |
| C7H7NO2          | DB08797 | Salicylamide          | -3.307 | -3.345 |
| C7H8O            | DB06770 | Benzyl alcohol        | -3.338 | -3.338 |
| C23H27FN4O3      | DB01267 | Paliperidone          | -3.322 | -3.332 |
| C22H24ClN3O      | DB00972 | Azelastine            | -3.33  | -3.331 |
| C12H18N2O2S      | DB01154 | Thiamylal             | -1.302 | -3.327 |
| C10H12O2         | DB06819 | Phenylbutyric acid    | -3.322 | -3.325 |
| C17H26N4O        | DB01084 | Emedastine            | -3.026 | -3.32  |
| C9H13N           | DB01576 | Dextroamphetamine     | -3.318 | -3.319 |
| C34H41N7O5       | DB06695 | Dabigatran etexilate  | -1.775 | -3.312 |
| C20H21NO4        | DB01113 | Papaverine            | -2.154 | -3.308 |
| C11H12ClNO3S     | DB01178 | Chlormezanone         | -3.3   | -3.3   |
| C19H14Cl2N2O3S   | DB08828 | Vismodegib            | -3.283 | -3.283 |
| C6H8O7           | DB04272 | Citric acid           | -3.28  | -3.28  |
| C6H5GaO7         | DB06784 | Gallium citrate Ga 67 | -3.28  | -3.28  |
| C8H8N4           | DB01275 | Hydralazine           | -2.757 | -3.28  |
| C9H13NO2         | DB01031 | Ethinamate            | -3.279 | -3.279 |
| C9H7N7O2S        | DB00993 | Azathioprine          | -1.533 | -3.275 |
| C12H13NO2        | DB05246 | Methsuximide          | -3.27  | -3.27  |
| C9H7N7O2S        | DB00993 | Azathioprine          | -2.896 | -3.266 |
| C5H9N3           | DB05381 | Histamine             | -1.932 | -3.264 |
| C35H42N2O9       | DB01180 | Rescinnamine          | -1.51  | -3.263 |
| C22H30MnN4O14P2  | DB06796 | Mangafodipir          | -0.753 | -3.263 |
| C14H23NO         | DB06204 | Tapentadol            | -3.262 | -3.262 |
| C15H22N2O        | DB08918 | Levomilnacipran       | -3.256 | -3.257 |
| C17H23N3O        | DB06691 | Mepyramine            | -3.25  | -3.256 |
| C20H17ClN2O3     | DB01587 | Ketazolam             | -3.255 | -3.255 |
| C4H11NO3         | DB03754 | Tromethamine          | -3.015 | -3.255 |
| C12H14N4O4S      | DB01299 | Sulfadoxine           | -1.648 | -3.253 |
| C18H20N2         | DB06148 | Mianserin             | -3.096 | -3.247 |
| C10H16NO         | DB01010 | Edrophonium           | -3.175 | -3.246 |
| CH4N2O2          | DB01005 | Hydroxyurea           | -3.234 | -3.242 |
| C14H14N2         | DB06711 | Naphazoline           | -3.241 | -3.241 |
| C21H22Cl2FN5O    | DB08865 | Crizotinib            | -2.745 | -3.24  |
| C22H19ClO3       | DB01117 | Atovaquone            | -3.239 | -3.239 |
| C6H18N4          | DB06824 | Triethylenetetramine  | -1.747 | -3.237 |
| C6H10O6          | DB04564 | Gluconolactone        | -3.236 | -3.236 |
| C8H8N4           | DB01275 | Hydralazine           | -2.911 | -3.236 |
| C17H20N2S        | DB01069 | Promethazine          | -3.234 | -3.235 |
| C18H22N2         | DB01176 | Cyclizine             | -1.199 | -3.23  |
| C22H30MnN4O14P2  | DB06796 | Mangafodipir          | -2.041 | -3.227 |
| C10H16N2O3       | DB01353 | Butobarbital          | -3.187 | -3.222 |
| C3H6O3           | DB04398 | Lactic acid           | -3.208 | -3.208 |

|               |         |                        |        |        |
|---------------|---------|------------------------|--------|--------|
| C20H27N       | DB01616 | Alverine               | -3.203 | -3.204 |
| C5H9N3        | DB05381 | Histamine              | -2.689 | -3.197 |
| C21H32Cl2N4O  | DB06016 | Cariprazine            | -1.718 | -3.196 |
| C16H24N10O4   | DB01223 | Aminophylline          | -1.363 | -3.196 |
| C11H12N4O2S   | DB01581 | Sulfamerazine          | -0.82  | -3.196 |
| C4H3N3O4      | DB03209 | Oteracil               | -1.015 | -3.195 |
| C26H30Cl2F3NO | DB01218 | Halofantrine           | -3.191 | -3.192 |
| C5H9N3        | DB05381 | Histamine              | -2.734 | -3.189 |
| C26H27N5O2    | DB06684 | Vilazodone             | -3.076 | -3.178 |
| C16H19CIN2    | DB01114 | Chlorphenamine         | -3.173 | -3.173 |
| C6H11NO3      | DB00992 | Methyl aminolevulinate | -2.694 | -3.169 |
| C18H29NO2     | DB01359 | Penbutolol             | -3.167 | -3.168 |
| C40H59NO11    | DB08871 | Eribulin               | -3.159 | -3.167 |
| C18H22N2      | DB01176 | Cyclizine              | -2.772 | -3.167 |
| C7H8CIN3O4S2  | DB00999 | Hydrochlorothiazide    | -0.915 | -3.165 |
| C20H24N2      | DB08801 | Dimetindene            | -2.648 | -3.162 |
| C10H9AgN4O2S  | DB05245 | Silver sulfadiazine    | -2.293 | -3.162 |
| C8H7CIN2O2S   | DB01119 | Diazoxide              | -0.589 | -3.159 |
| C12H14N4O4S   | DB01299 | Sulfadoxine            | -3.006 | -3.158 |
| C10H15N       | DB01577 | Metamfetamine          | -3.155 | -3.155 |
| C11H14CIN     | DB04871 | Lorcaserin             | -3.154 | -3.155 |
| C8H8Cl3N3O4S2 | DB01021 | Trichlormethiazide     | -2.906 | -3.155 |
| C12H21N3O5S3  | DB01194 | Brinzolamide           | -3.107 | -3.152 |
| C20H21FN6O5   | DB06817 | Raltegravir            | -2.88  | -3.151 |
| C24H35N5O5    | DB04898 | Ximelagatran           | -2.453 | -3.151 |
| C19H26N2S     | DB01186 | Pergolide              | -3.134 | -3.145 |
| C14H22N2O2    | DB00989 | Rivastigmine           | -1.613 | -3.113 |
| C12H16F3N     | DB01191 | Dexfenfluramine        | -3.107 | -3.107 |
| C18H14F4N2O4S | DB01128 | Bicalutamide           | -3.106 | -3.106 |
| C18H26CIN3O3  | DB06480 | Prucalopride           | -3.098 | -3.105 |
| C3H9NO3       | DB06768 | Ammonium lactate       | -3.101 | -3.101 |
| C12H14N4O2S   | DB01582 | Sulfamethazine         | -1.257 | -3.095 |
| C17H11ClF4N2S | DB01589 | Quazepam               | -3.094 | -3.094 |
| C6H6O         | DB03255 | Phenol                 | -3.092 | -3.093 |
| C12H9F3N2O2   | DB01097 | Leflunomide            | -3.092 | -3.092 |
| C16H24N2      | DB06694 | Xylometazoline         | -3.091 | -3.091 |
| C12H13N       | DB01367 | Rasagiline             | -2.673 | -3.09  |
| C19H21NS      | DB06153 | Pizotifen              | -3.081 | -3.089 |
| C16H21Cl2N3O2 | DB06769 | Bendamustine           | -2.701 | -3.084 |
| C13H13N3      | DB01273 | Varenicline            | -3.077 | -3.077 |
| C8H7CIN2O2S   | DB01119 | Diazoxide              | -3.065 | -3.073 |
| C3H8O2        | DB01839 | Propylene glycol       | -3.07  | -3.07  |
| C40H48N2O6    | DB01336 | Metocurine             | -3.069 | -3.069 |
| C15H21N3O3S   | DB01120 | Gliclazide             | -3.046 | -3.069 |
| C21H25CIN2O3  | DB06282 | Levocetirizine         | -2.654 | -3.065 |
| C12H17NO2     | DB01188 | Ciclopirox             | -3.062 | -3.062 |
| C19H24N2O2    | DB01058 | Praziquantel           | -3.057 | -3.057 |
| C11H16CIN5    | DB01131 | Proguanil              | -1.068 | -3.055 |
| C11H12N4O2S   | DB01581 | Sulfamerazine          | -0.629 | -3.053 |
| C9H11NO2      | DB01086 | Benzocaine             | -3.048 | -3.048 |
| C3H7NO2       | DB04827 | Urethane               | -3.045 | -3.045 |
| C3H8O         | DB03175 | Propyl alcohol         | -3.041 | -3.041 |
| C23H27N       | DB01091 | Butenafine             | -2.896 | -3.029 |
| C20H15BrN6O   | DB06414 | Etravirine             | -3.024 | -3.024 |
| C43H51N3O11   | DB01220 | Rifaximin              | -2.227 | -3.023 |
| C11H16CIN5    | DB01131 | Proguanil              | -0.757 | -3.021 |
| C2H4Cl3O4P    | DB06753 | Triclofos              | -2.948 | -3.013 |
| C11H16CIN5    | DB01131 | Proguanil              | -0.962 | -3.012 |
| C26H25CIN2O3  | DB06212 | Tolvaptan              | -3.008 | -3.008 |
| C5H9NO3S      | DB06823 | Tiopronin              | -2.996 | -3.008 |
| C4H3N3O4      | DB03209 | Oteracil               | -2.928 | -3.007 |
| C26H26F2N2    | DB04841 | Flunarizine            | -0.34  | -3     |
| C21H23N7O2S   | DB06589 | Pazopanib              | -2.991 | -2.998 |



|                 |         |                           |        |        |
|-----------------|---------|---------------------------|--------|--------|
| C19H18N2O4S     | DB08439 | Parecoxib                 | -2.981 | -2.998 |
| C28H46O         | DB01070 | Dihydrotachysterol        | -2.997 | -2.997 |
| C5H7NO3         | DB03088 | Pidolic Acid              | -2.993 | -2.993 |
| C30H40N4        | DB04209 | Dequalinium               | -2.981 | -2.981 |
| C4H4FN3O        | DB01099 | Flucytosine               | -2.98  | -2.981 |
| C20H18NO4       | DB04115 | Berberine                 | -2.979 | -2.979 |
| C19H35N         | DB01074 | Perhexiline               | -2.977 | -2.977 |
| C12H13NO2S      | DB04657 | Carboxin                  | -2.975 | -2.975 |
| C17H25N3O2      | DB04876 | Vildagliptin              | -2.926 | -2.972 |
| C43H51N3O11     | DB01220 | Rifaximin                 | -1.931 | -2.971 |
| C9H17NO4        | DB08842 | Acetylcarnitine           | -2.968 | -2.968 |
| C27H33N3O6S     | DB01251 | Gliquidone                | -2.949 | -2.966 |
| C21H33N3O5S     | DB01605 | Pivmecillinam             | -2.965 | -2.965 |
| C24H27FN2O4     | DB04946 | Iloperidone               | -0.684 | -2.958 |
| C5H4N4S         | DB01033 | Mercaptopurine            | -2.842 | -2.957 |
| C26H28N3        | DB06816 | Pyrvinium                 | -2.956 | -2.956 |
| C7H10N2O2S      | DB06795 | Mafenide                  | -2.926 | -2.956 |
| C24H27N         | DB04825 | Prenylamine               | -2.942 | -2.942 |
| C11H16N2O2      | DB01085 | Pilocarpine               | -2.742 | -2.936 |
| C19H21NS        | DB06153 | Pizotifen                 | -0.357 | -2.933 |
| C14H22N2O3      | DB01297 | Practolol                 | -2.925 | -2.927 |
| C24H27FN2O4     | DB04946 | Iloperidone               | -2.91  | -2.923 |
| C14H10N4O5      | DB01219 | Dantrolene                | -1.632 | -2.913 |
| C18H22N2        | DB01176 | Cyclizine                 | -2.439 | -2.907 |
| C13H19CIN2O2    | DB01161 | Chloroprocaine            | -2.884 | -2.905 |
| C6H18N4         | DB06824 | Triethylenetetramine      | -2.807 | -2.894 |
| C35H35F2N8O5S   | DB06636 | Isavuconazonium           | -0.989 | -2.894 |
| C19H19N         | DB01619 | Phenindamine              | -2.435 | -2.891 |
| C22H22O8        | DB01179 | Podofilox                 | -2.883 | -2.883 |
| C9H17NO2        | DB00996 | Gabapentin                | -2.881 | -2.881 |
| C23H18CIF2N3O3S | DB08881 | Vemurafenib               | -2.431 | -2.875 |
| C22H30MnN4O14P2 | DB06796 | Mangafodipir              | -0.806 | -2.875 |
| C9H10Cl2N4      | DB00964 | Apraclonidine             | -2.863 | -2.866 |
| C9H9N3O2S2      | DB06147 | Sulfathiazole             | -2.178 | -2.859 |
| C4H6N2          | DB01213 | Fomepizole                | -2.849 | -2.849 |
| C2H7NO3S        | DB01956 | Taurine                   | -2.847 | -2.848 |
| C11H16CIN5      | DB01131 | Proguanil                 | -2.625 | -2.848 |
| C5H9NO3S        | DB06823 | Tiopronin                 | -0.526 | -2.848 |
| C10H22N4        | DB01170 | Guanethidine              | -2.822 | -2.844 |
| C11H11N5        | DB01438 | Phenazopyridine           | -2.831 | -2.836 |
| C2H4O3          | DB03085 | Glycolic acid             | -2.835 | -2.835 |
| C5H5NOS         | DB06815 | Pyrrithione               | -2.832 | -2.832 |
| C45H57NO14      | DB06772 | Cabazitaxel               | -2.825 | -2.828 |
| C7H6O2          | DB03793 | Benzoic Acid              | -2.822 | -2.822 |
| C13H21N3O       | DB01035 | Procainamide              | -2.814 | -2.817 |
| C4H8O3          | DB01440 | gamma-Hydroxybutyric acid | -2.811 | -2.813 |
| C12H17NO        | DB01579 | Phendimetrazine           | -2.597 | -2.812 |
| C8H12N2         | DB06698 | Betahistine               | -2.809 | -2.809 |
| C4H3N3O4        | DB03209 | Oteracil                  | -1.259 | -2.79  |
| C25H32CIN5O2    | DB01149 | Nefazodone                | -2.371 | -2.789 |
| C53H67N9O10S    | DB01369 | Quinupristin              | -0.832 | -2.784 |
| C13H18CINO      | DB01156 | Bupropion                 | -2.544 | -2.781 |
| C11H12N4O3S     | DB06821 | Sulfameter                | -2.327 | -2.776 |
| C30H32Cl3NO     | DB06708 | Lumefantrine              | -0.869 | -2.77  |
| C28H54N8        | DB06809 | Plerixafor                | -0.7   | -2.754 |
| C6H14O6S2       | DB01008 | Busulfan                  | -2.744 | -2.744 |
| C4H3N3O4        | DB03209 | Oteracil                  | -0.264 | -2.744 |
| C5H4N4S         | DB01033 | Mercaptopurine            | -1.698 | -2.737 |
| C3H8OS2         | DB06782 | Dimercaprol               | -2.728 | -2.735 |
| C23H28CIN3O5S   | DB01016 | Glyburide                 | -2.71  | -2.731 |
| C11H12N4O2S     | DB01581 | Sulfamerazine             | -1.951 | -2.711 |
| C4H11NO3        | DB03754 | Tromethamine              | -2.056 | -2.708 |
| C35H35F2N8O5S   | DB06636 | Isavuconazonium           | -2.273 | -2.705 |

|                 |         |                                 |        |        |
|-----------------|---------|---------------------------------|--------|--------|
| C28H54N8        | DB06809 | Plerixafor                      | 0.03   | -2.693 |
| C4H9NO2         | DB02530 | gamma-Aminobutyric acid         | -2.682 | -2.682 |
| C12H21N5O3      | DB01303 | Oxtriphylline                   | -2.681 | -2.681 |
| C26H29MgNO10    | DB01401 | Choline magnesium trisalicylate | -2.681 | -2.681 |
| C23H27Cl2N3O2   | DB01238 | Aripiprazole                    | -2.479 | -2.672 |
| C22H48N         | DB04221 | Didecyldimethylammonium         | -2.664 | -2.664 |
| C23H20F3N5O2S2  | DB08912 | Dabrafenib                      | -2.248 | -2.664 |
| C13H17N         | DB01037 | Selegiline                      | -2.555 | -2.656 |
| C19H25N5O4      | DB01162 | Terazosin                       | -2.525 | -2.647 |
| C19H17ClN2O     | DB01588 | Prazepam                        | -2.644 | -2.644 |
| C10H16O         | DB01744 | Camphor                         | -2.642 | -2.642 |
| C28H22F3N7O     | DB04868 | Nilotinib                       | -2.489 | -2.629 |
| C35H60N2O4      | DB01337 | Pancuronium                     | -2.628 | -2.628 |
| C22H21Cl3N4O    | DB06155 | Rimonabant                      | -2.623 | -2.623 |
| C5H6N2          | DB06637 | Dalfampridine                   | -2.62  | -2.623 |
| C3H8OS2         | DB06782 | Dimercaprol                     | 0.037  | -2.619 |
| C13H16N2        | DB06764 | Tetryzoline                     | -2.608 | -2.608 |
| C26H26F2N2      | DB04841 | Flunarizine                     | -1.388 | -2.608 |
| C70H94N18O16    | DB06788 | Histrelin                       | -0.654 | -2.602 |
| C23H29N3O2S2    | DB01623 | Thiothixene                     | -0.588 | -2.6   |
| C34H41N7O5      | DB06695 | Dabigatran etexilate            | -0.456 | -2.599 |
| C35H62N4O4      | DB01338 | Pipecuronium                    | -2.36  | -2.567 |
| C13H11NO3       | DB06807 | Phenyl aminosalicylate          | -0.615 | -2.566 |
| C10H11N3O3S     | DB01015 | Sulfamethoxazole                | -0.028 | -2.564 |
| C5H11NO2        | DB06756 | Glycine betaine                 | -2.561 | -2.561 |
| C58H80N2O14     | DB01226 | Mivacurium                      | -2.555 | -2.555 |
| C8H8Cl3N3O4S2   | DB01021 | Trichlormethiazide              | -1.912 | -2.545 |
| C35H62N4O4      | DB01338 | Pipecuronium                    | -1.73  | -2.539 |
| C25H32N2O4      | DB06274 | Alvimopan                       | -2.532 | -2.537 |
| C22H30MnN4O14P2 | DB06796 | Mangafodipir                    | -1.339 | -2.524 |
| C28H28N2O2      | DB01501 | Difenoxin                       | -2.504 | -2.52  |
| C23H29N3O2S2    | DB01623 | Thiothixene                     | -2.416 | -2.514 |
| C10H11N3O3S     | DB01015 | Sulfamethoxazole                | -2.504 | -2.513 |
| C19H23NO        | DB01146 | Diphenylpyraline                | -2.499 | -2.502 |
| C18H26ClN3O     | DB01611 | Hydroxychloroquine              | -2.443 | -2.493 |
| C6H11NO3        | DB00992 | Methyl aminolevulinate          | -2.139 | -2.492 |
| C3H4Cl2F2O      | DB01028 | Methoxyflurane                  | -2.482 | -2.482 |
| C10H9AgN4O2S    | DB05245 | Silver sulfadiazine             | -2.326 | -2.482 |
| C25H36N3O9PS    | DB01319 | Fosamprenavir                   | -2.395 | -2.469 |
| C11H12N4O3S     | DB06821 | Sulfamer                        | -2.089 | -2.465 |
| C23H27N3O7      | DB01017 | Minocycline                     | 0.174  | -2.456 |
| C35H42N2O9      | DB01180 | Rescinnamine                    | -2.421 | -2.453 |
| C11H21NO3       | DB06261 | Hexaminolevulinate              | -1.996 | -2.442 |
| C14H20N2O3      | DB02546 | Vorinostat                      | -2.439 | -2.439 |
| C13H19N5        | DB06762 | Pinacidil                       | -2.431 | -2.437 |
| C10H21N         | DB06714 | Propylhexedrine                 | -2.413 | -2.413 |
| C12H21N         | DB01043 | Memantine                       | -2.401 | -2.401 |
| C18H18ClNS      | DB01239 | Chlorprothixene                 | -2.383 | -2.387 |
| C21H27N5O4S     | DB01067 | Glipizide                       | -0.413 | -2.382 |
| C11H17BrN       | DB01158 | Bretylium                       | -2.379 | -2.379 |
| C19H25NOS       | DB05271 | Rotigotine                      | -2.368 | -2.374 |
| C11H13N         | DB01626 | Pargyline                       | -2.228 | -2.373 |
| C13H19NO4S      | DB01032 | Probenecid                      | -2.371 | -2.371 |
| C7H17N2O2       | DB01019 | Bethanechol                     | -2.366 | -2.366 |
| C2H3Cl3O2       | DB01563 | Chloral hydrate                 | -2.329 | -2.329 |
| C6H12N3PS       | DB04572 | Thiotepa                        | -2.324 | -2.324 |
| C35H62N4O4      | DB01338 | Pipecuronium                    | -0.217 | -2.302 |
| C4H6N4O12       | DB01613 | Erythryl tetranitrate           | -2.298 | -2.298 |
| C9H9N3O2S2      | DB06147 | Sulfathiazole                   | -2.059 | -2.285 |
| C12H13N         | DB01367 | Rasagiline                      | -1.879 | -2.283 |
| C21H32Cl2N4O    | DB06016 | Cariprazine                     | -2.221 | -2.272 |
| C28H24FN3O5     | DB08875 | Cabozantinib                    | -2.225 | -2.27  |
| C26H29F2N7      | DB01430 | Almitrine                       | -2.22  | -2.263 |

|               |         |                              |        |        |
|---------------|---------|------------------------------|--------|--------|
| CuO4S         | DB06778 | Cupric sulfate               | -2.256 | -2.256 |
| C7H8ClN3O4S2  | DB00999 | Hydrochlorothiazide          | -2.24  | -2.254 |
| C13H17N       | DB01037 | Selegiline                   | -1.156 | -2.254 |
| C34H41N7O5    | DB06695 | Dabigatran etexilate         | -0.695 | -2.254 |
| C5H11NO2S     | DB02893 | D-Methionine                 | -2.236 | -2.236 |
| CH4N2O        | DB03904 | Urea                         | -2.23  | -2.23  |
| ClH4N         | DB06767 | Ammonium chloride            | -2.222 | -2.224 |
| C28H54N8      | DB06809 | Plerixafor                   | -0.027 | -2.216 |
| C12H21N3O5S3  | DB01194 | Brinzolamide                 | -0.479 | -2.213 |
| C15H21N3O3S   | DB01120 | Gliclazide                   | -0.29  | -2.213 |
| C24H34N2O     | DB01244 | Bepidil                      | -2.21  | -2.21  |
| C22H25N2OS    | DB01116 | Trimethaphan                 | -2.208 | -2.208 |
| C2H2Cl2O2     | DB08809 | Dichloroacetic acid          | -2.183 | -2.183 |
| C9H19N        | DB06706 | Isometheptene                | -2.18  | -2.18  |
| C11H17N       | DB01365 | Mephentermine                | -2.173 | -2.173 |
| C20H41NO3     | DB06689 | Ethanolamine oleate          | -2.153 | -2.156 |
| C11H21NO3     | DB06261 | Hexaminolevulinate           | -1.746 | -2.123 |
| C2H4O2        | DB03166 | Acetic acid                  | -2.113 | -2.116 |
| C14H12O3      | DB01428 | Oxybenzone                   | -0.431 | -2.111 |
| C6H6Cl2N2O4S2 | DB01144 | Diclofenamide                | -2.103 | -2.11  |
| C23H30GdN3O11 | DB08884 | Gadoxetic acid               | -1.218 | -2.103 |
| C28H54N8      | DB06809 | Plerixafor                   | -1.356 | -2.094 |
| C16H32O2      | DB03796 | Palmitic Acid                | -2.088 | -2.091 |
| C2H6OS        | DB01093 | Dimethyl sulfoxide           | -2.089 | -2.089 |
| C4H3F7O       | DB01236 | Sevoflurane                  | -2.087 | -2.087 |
| C26H26F2N2    | DB04841 | Flunarizine                  | -1.993 | -2.081 |
| C21H27N5O4S   | DB01067 | Glipizide                    | -2.057 | -2.079 |
| C30H32Cl3NO   | DB06708 | Lumefantrine                 | -2.034 | -2.059 |
| C18H34O2      | DB04224 | Oleic Acid                   | -2.022 | -2.025 |
| C12H18N2O3S   | DB01124 | Tolbutamide                  | -2.004 | -2.022 |
| C17H22N2S     | DB04826 | Thenalidine                  | -2.019 | -2.019 |
| C53H67N9O10S  | DB01369 | Quinupristin                 | -1.588 | -1.984 |
| C24H36N4O6S2  | DB06176 | Romidepsin                   | -1.981 | -1.981 |
| C29H31F2N3O   | DB04842 | Fluspirilene                 | -1.955 | -1.96  |
| C8H18NO2      | DB06709 | Methacholine                 | -1.959 | -1.959 |
| C12H19N2O2    | DB01400 | Neostigmine                  | -1.957 | -1.957 |
| C12H24O2      | DB03017 | Lauric acid                  | -1.939 | -1.943 |
| C23H27Cl2N3O2 | DB01238 | Aripiprazole                 | -1.164 | -1.923 |
| C26H29F2N7    | DB01430 | Almitrine                    | -0.258 | -1.917 |
| C11H13N       | DB01626 | Pargyline                    | -0.984 | -1.887 |
| C23H30GdN3O11 | DB08884 | Gadoxetic acid               | -0.155 | -1.878 |
| C6H11NO2      | DB01080 | Vigabatrin                   | -1.865 | -1.865 |
| C23H30GdN3O11 | DB08884 | Gadoxetic acid               | -0.806 | -1.859 |
| C15H14N4O2S   | DB06729 | Sulfaphenazole               | -1.804 | -1.857 |
| C40H56        | DB06755 | Beta carotene                | -1.829 | -1.829 |
| C18H36O2      | DB03193 | Stearic acid                 | -1.82  | -1.823 |
| C56H78N2O16   | DB01135 | Doxacurium                   | -1.811 | -1.811 |
| C15H21N3O2    | DB00981 | Physostigmine                | 0.692  | -1.805 |
| C27H33N3O8    | DB01301 | Rolitetraacycline            | -0.22  | -1.804 |
| C15H32N2      | DB01090 | Pentolinium                  | -1.8   | -1.8   |
| C14H22N2O2    | DB00989 | Rivastigmine                 | -1.706 | -1.755 |
| CH2O          | DB03843 | Formaldehyde                 | -1.754 | -1.754 |
| C31H48O6      | DB02703 | Fusidic acid                 | 0.287  | -1.743 |
| CH4N2O2       | DB01005 | Hydroxyurea                  | 0.755  | -1.743 |
| C43H58N4O12   | DB01045 | Rifampicin                   | -0.84  | -1.726 |
| C39H43N3O11S  | DB05109 | Trabectedin                  | -0.718 | -1.722 |
| C13H15N3O4S   | DB01382 | Glymidine                    | -1.312 | -1.693 |
| C21H26N2O3    | DB01392 | Yohimbine                    | 0.226  | -1.679 |
| C5H8N4O12     | DB06154 | Pentaerythritol tetranitrate | -1.672 | -1.672 |
| C13H11NO3     | DB06807 | Phenyl aminosaliclylate      | -1.61  | -1.632 |
| C3H2F6O       | DB01189 | Desflurane                   | -1.627 | -1.627 |
| C3H6O2        | DB03766 | Propanoic acid               | -1.608 | -1.611 |
| GaN3O9        | DB05260 | Gallium nitrate              | -1.603 | -1.603 |

|                |         |                      |        |        |
|----------------|---------|----------------------|--------|--------|
| C6H12N4        | DB06799 | Methenamine          | 0.683  | -1.58  |
| C28H29F2N3O    | DB01100 | Pimozide             | -1.522 | -1.529 |
| C6H12N4        | DB06799 | Methenamine          | -1.475 | -1.488 |
| C43H58N4O12    | DB01045 | Rifampicin           | -1.103 | -1.47  |
| C30H32N2O2     | DB01081 | Diphenoxylate        | -1.08  | -1.464 |
| CHNaO3         | DB01390 | Sodium bicarbonate   | -1.33  | -1.442 |
| CCaO3          | DB06724 | Calcium Carbonate    | -1.33  | -1.442 |
| C3La2O9        | DB06792 | Lanthanum carbonate  | -1.33  | -1.442 |
| C3H8O          | DB02325 | Isopropyl alcohol    | -1.417 | -1.417 |
| C7H16NO2       | DB03128 | Acetylcholine        | -1.337 | -1.337 |
| C28H54N8       | DB06809 | Plerixafor           | 1.363  | -1.308 |
| C32H38N2O8     | DB01089 | Deserpidine          | 0.468  | -1.257 |
| N2O            | DB06690 | Nitrous oxide        | -1.233 | -1.233 |
| C2HBrClF3      | DB01159 | Halothane            | -1.216 | -1.216 |
| C15H21N3O2     | DB00981 | Physostigmine        | -1.119 | -1.128 |
| I2             | DB05382 | Iodine               | -1.121 | -1.121 |
| C47H64N4O12    | DB01201 | Rifapentine          | -0.765 | -1.113 |
| C30H26F6N4O2   | DB01419 | Antrafenine          | 0.621  | -1.112 |
| C59H79N15O21S6 | DB08890 | Linaclotide          | -0.525 | -1.056 |
| C21H23N7O2S    | DB06589 | Pazopanib            | 1.741  | -0.901 |
| C16H38N2       | DB01245 | Decamethonium        | -0.888 | -0.888 |
| C28H54N8       | DB06809 | Plerixafor           | 1.394  | -0.797 |
| C28H54N8       | DB06809 | Plerixafor           | 0.474  | -0.791 |
| C13H8Cl2N2O4   | DB06803 | Niclosamide          | -0.696 | -0.763 |
| C19H42N        | DB01718 | Cetrimonium          | -0.758 | -0.758 |
| C5H11NO2       | DB01612 | Amyl Nitrite         | -0.702 | -0.702 |
| C12H18N2O3S    | DB01124 | Tolbutamide          | 1.379  | -0.701 |
| C34H41N7O5     | DB06695 | Dabigatran etexilate | 1.68   | -0.68  |
| C17H15N3O6     | DB01014 | Balsalazide          | -0.655 | -0.656 |
| C24H33N3O3S2   | DB01621 | Pipotiazine          | -0.575 | -0.575 |
| Al2H4O9Si2     | DB01575 | Kaolin               | -0.561 | -0.561 |
| C12H6Cl4O2S    | DB04813 | Bithionol            | -0.11  | -0.499 |
| C26H29FN2O2    | DB01106 | Levocabastine        | -0.444 | -0.444 |
| C10H16NO       | DB01010 | Edrophonium          | 1.032  | -0.259 |
| C28H54N8       | DB06809 | Plerixafor           | 2.219  | -0.211 |
| C24H35N5O5     | DB04898 | Ximelagatran         | 0.03   | -0.188 |
| C28H36N4O2S    | DB08815 | Lurasidone           | -0.155 | -0.155 |
| C17H17ClN6O3   | DB01198 | Zopiclone            | 0.262  | -0.088 |
| C28H54N8       | DB06809 | Plerixafor           | 2.729  | 0.036  |
| C56H87NO16     | DB06287 | Temsirolimus         | 0.212  | 0.21   |
| C43H58N4O12    | DB01045 | Rifampicin           | 1.602  | 0.511  |
| C47H64N4O12    | DB01201 | Rifapentine          | 1.548  | 0.688  |
| C70H94N18O16   | DB06788 | Histrelin            | 2.727  | 0.746  |
| C47H51NO14     | DB01229 | Paclitaxel           | 1.027  | 1.026  |
| C37H61N2O4     | DB04834 | Rapacuronium         | 1.237  | 1.233  |
| C35H62N4O4     | DB01338 | Pipecuronium         | 4.064  | 1.359  |
| C21H23NO5      | DB01452 | Diamorphine          | 3.039  | 1.688  |
| C47H64N4O12    | DB01201 | Rifapentine          | 3.909  | 1.916  |
| C25H43N13O10   | DB06827 | Viomycin             | 2.351  | 1.941  |
| C6H8O4         | DB08908 | Dimethyl fumarate    | 2.072  | 2.072  |
| C34H57N2O4     | DB01339 | Vecuronium           | 4.081  | 4.077  |

### FDA approved drugs with 6y84, Table S9

| FORMULA          | DRUGBANK_ID | GENERIC_NAME                | docking score | glide gscore |
|------------------|-------------|-----------------------------|---------------|--------------|
| C37H48I6N6O18    | DB09487     | Iotrolan                    | -10.853       | -11.001      |
| C36H70O19        | DB11602     | Hydroxyethyl cellulose      | -10.119       | -10.119      |
| C11H20O10        | DB12767     | Gaxilose                    | -9.728        | -9.728       |
| C62H80InN12O19S2 | DB11835     | Indium In-111 pentetreotide | -9.464        | -10.795      |

|                  |         |                             |        |         |
|------------------|---------|-----------------------------|--------|---------|
| C18H24I3N3O8     | DB09156 | Iopromide                   | -9.338 | -9.338  |
| C65H87LuN14O19S2 | DB13985 | Lutetium Lu 177 dotatate    | -8.948 | -10.607 |
| C17H22I3N3O8     | DB08947 | Iopamidol                   | -8.567 | -8.567  |
| C62H80InN12O19S2 | DB11835 | Indium In-111 pentetreotide | -8.32  | -10.178 |
| C28H32O15        | DB08995 | Diosmin                     | -8.28  | -8.28   |
| C49H62N10O16S3   | DB09142 | Sinacalide                  | -8.216 | -8.233  |
| C22H42N4O8S2     | DB11190 | Pantethine                  | -7.813 | -7.813  |
| C65H90N14O19S2   | DB14554 | Dotatate                    | -7.75  | -9.43   |
| C65H87LuN14O19S2 | DB13985 | Lutetium Lu 177 dotatate    | -7.701 | -9.451  |
| C62H80InN12O19S2 | DB11835 | Indium In-111 pentetreotide | -7.659 | -9.487  |
| C32H50O13        | DB12434 | Steviolbioside              | -7.617 | -7.621  |
| C20H25N7O6       | DB11256 | Levomefolic acid            | -7.599 | -7.615  |
| C42H62O16        | DB13751 | Glycyrrhizic acid           | -7.592 | -7.596  |
| C65H87LuN14O19S2 | DB13985 | Lutetium Lu 177 dotatate    | -7.448 | -9.16   |
| C25H48N6O10      | DB12615 | Plazomicin                  | -7.418 | -9.565  |
| C65H90N14O19S2   | DB14554 | Dotatate                    | -7.416 | -9.18   |
| C37H48I6N6O18    | DB09487 | Iotrolan                    | -7.311 | -8.205  |
| C29H40N4O7       | DB12455 | Omadacycline                | -7.305 | -7.431  |
| C18H24I3N3O8     | DB09135 | Ioxilan                     | -7.278 | -7.278  |
| C65H90N14O19S2   | DB14554 | Dotatate                    | -7.201 | -8.913  |
| C12H29Fe5Na2O23  | DB09146 | Iron saccharate             | -7.1   | -7.1    |
| C24H21I6N5O8     | DB09313 | Ioxaglic acid               | -7.031 | -7.031  |
| C17H22I3N3O8     | DB11705 | Iomeprol                    | -6.993 | -6.993  |
| C20H28I3N3O9     | DB12407 | Iobitridol                  | -6.975 | -6.975  |
| C62H80InN12O19S2 | DB11835 | Indium In-111 pentetreotide | -6.956 | -8.765  |
| C12H22MnO14      | DB11141 | Manganese gluconate         | -6.921 | -6.921  |
| C12H22CaO14      | DB11126 | Calcium gluconate           | -6.921 | -6.921  |
| C17H15BrF2N4O3   | DB11967 | Binimetinib                 | -6.917 | -6.926  |
| C62H80InN12O19S2 | DB11835 | Indium In-111 pentetreotide | -6.886 | -8.531  |
| C65H90N14O19S2   | DB14554 | Dotatate                    | -6.737 | -8.553  |
| C50H71N13O12     | DB11842 | Angiotensin II              | -6.731 | -7.381  |
| C26H27F3N2O6     | DB11712 | Tezacaftor                  | -6.622 | -6.622  |
| C43H67N11O12S2   | DB09059 | Atosiban                    | -6.574 | -6.574  |
| C13H21NO3        | DB13139 | Levosalbutamol              | -6.417 | -6.417  |
| C15H14O6         | DB14086 | Cianidanol                  | -6.402 | -6.402  |
| C62H80InN12O19S2 | DB11835 | Indium In-111 pentetreotide | -6.347 | -7.944  |
| C11H16N8O8       | DB14075 | Imidurea                    | -6.328 | -6.614  |
| C20H23N7O7       | DB11596 | Levoleucovorin              | -6.327 | -6.327  |
| C50H68N14O10     | DB11653 | Bremelanotide               | -6.325 | -6.946  |
| C14H26N4O11P2    | DB12153 | Citicoline                  | -6.259 | -6.259  |
| C46H65N13O12S2   | DB14642 | Lypressin                   | -6.25  | -6.443  |
| C32H30F5N3O5     | DB11979 | Elagolix                    | -6.24  | -6.448  |
| C65H90N14O19S2   | DB14554 | Dotatate                    | -6.221 | -7.618  |
| C6H12O6          | DB13178 | Inositol                    | -6.186 | -6.186  |
| C18H24I3N3O9     | DB09134 | Ioversol                    | -6.185 | -6.185  |
| C12H16O7         | DB14109 | alpha-Arbutin               | -6.165 | -6.165  |
| C25H48N6O10      | DB12615 | Plazomicin                  | -6.157 | -6.648  |
| C29H40N4O7       | DB12455 | Omadacycline                | -6.125 | -7.382  |
| C26H30N6O3       | DB13074 | Macimorelin                 | -6.109 | -6.231  |
| C10H15N3O5       | DB12783 | Benserazide                 | -6.104 | -6.196  |
| C21H29N6O5P      | DB09299 | Tenofovir alafenamide       | -6.037 | -6.037  |
| C11H16N8O8       | DB14075 | Imidurea                    | -6.021 | -6.66   |
| C20H22O8         | DB11263 | Polydatin                   | -6.013 | -6.013  |
| C12H26MgO16      | DB13749 | Magnesium gluconate         | -6.004 | -6.004  |
| C24H33Cl2NO5     | DB09082 | Vilanterol                  | -5.933 | -5.939  |
| C28H27N3O3       | DB13931 | Netarsudil                  | -5.817 | -5.828  |
| C15H18N2O9       | DB09144 | Uridine triacetate          | -5.806 | -5.808  |
| C12H22O14Zn      | DB11248 | Zinc gluconate              | -5.75  | -5.75   |
| C25H48N6O10      | DB12615 | Plazomicin                  | -5.732 | -6.631  |
| C8H18O10S2       | DB12097 | Mannitol busulfan           | -5.719 | -5.719  |
| C6H11KO7         | DB13620 | Potassium gluconate         | -5.69  | -5.69   |
| C21H30NO4        | DB09300 | Butylscopolamine            | -5.689 | -5.689  |
| C19H23N4O6PS     | DB11748 | Benfotiamine                | -5.662 | -6.928  |

|                  |         |                                    |        |        |
|------------------|---------|------------------------------------|--------|--------|
| C30H53N3O6       | DB09026 | Aliskiren                          | -5.645 | -5.65  |
| C23H32O3         | DB13956 | Estradiol valerate                 | -5.62  | -5.62  |
| C22H28O5         | DB09383 | Meprednisone                       | -5.611 | -5.611 |
| C15H16O9         | DB13155 | Esculin                            | -5.609 | -5.62  |
| C29H42O6         | DB14541 | Hydrocortisone cypionate           | -5.588 | -5.588 |
| C23H27ClO7       | DB09038 | Empagliflozin                      | -5.582 | -5.582 |
| C23H26FN6O9P     | DB12010 | Fostamatinib                       | -5.574 | -6.928 |
| C27H41NO8        | DB11660 | Latanoprostene Bunod               | -5.557 | -5.557 |
| C23H23ClFNO5     | DB09101 | Elvitegravir                       | -5.495 | -6.451 |
| C34H53NO11       | DB09049 | Naloxegol                          | -5.494 | -5.581 |
| C23H30N12O8S2    | DB09050 | Ceftolozane                        | -5.473 | -5.475 |
| C11H8Na4O8P2     | DB09332 | Kappadione                         | -5.47  | -6.813 |
| C65H87LuN14O19S2 | DB13985 | Lutetium Lu 177 dotatate           | -5.46  | -7.224 |
| C28H33N7O2       | DB09330 | Osimertinib                        | -5.445 | -5.453 |
| C22H25ClO7       | DB11827 | Ertugliflozin                      | -5.414 | -5.414 |
| C10H8N2O2S2      | DB11327 | Dipyrrithione                      | -5.404 | -5.404 |
| C12H22FeO14      | DB14488 | Ferrous gluconate                  | -5.39  | -5.39  |
| C6H12O6          | DB11735 | Galactose                          | -5.387 | -5.387 |
| C19H23N4O6PS     | DB11748 | Benfotiamine                       | -5.382 | -6.623 |
| C29H44N8O3       | DB12141 | Gilteritinib                       | -5.381 | -5.407 |
| C23H23ClFNO5     | DB09101 | Elvitegravir                       | -5.374 | -5.51  |
| C28H41N3O3       | DB12532 | Oxetacaine                         | -5.372 | -5.44  |
| C30H44N2O10      | DB13265 | Hexobendine                        | -5.36  | -5.381 |
| C34H67O10P       | DB11284 | DL-dimyristoylphosphatidylglycerol | -5.35  | -5.35  |
| C52H78N10O17     | DB13156 | Inosine pranobex                   | -5.347 | -5.347 |
| C65H90N14O19S2   | DB14554 | Dotatate                           | -5.324 | -6.954 |
| C8H14N4O7        | DB14173 | Diazolidinylurea                   | -5.314 | -5.314 |
| C11H12O8P2       | DB14650 | Menadiol diphosphate               | -5.305 | -6.724 |
| C11H8Na4O8P2     | DB09332 | Kappadione                         | -5.305 | -6.724 |
| C20H17F3N2O4     | DB08976 | Floctafenine                       | -5.3   | -5.314 |
| C18H33CrO21      | DB14528 | Chromium gluconate                 | -5.294 | -5.294 |
| C56H98N16O13     | DB00781 | Polymyxin B                        | -5.282 | -5.291 |
| C18H37N5O8       | DB13270 | Dibekacin                          | -5.277 | -6.758 |
| C22H29FN3O9P     | DB08934 | Sofosbuvir                         | -5.254 | -5.257 |
| C21H28O3         | DB11636 | Nomegestrol                        | -5.246 | -5.246 |
| C29H34Cl2N6O3S2  | DB11995 | Avatrombopag                       | -5.233 | -5.237 |
| C6H12O7          | DB13180 | Gluconic Acid                      | -5.224 | -5.224 |
| C11H18N2O9       | DB12362 | Diaminopropanol tetraacetic acid   | -5.21  | -5.299 |
| C32H43N5O5       | DB11275 | Epicriptine                        | -5.188 | -5.231 |
| C65H90N14O19S2   | DB14554 | Dotatate                           | -5.18  | -6.944 |
| C6H8CaO8         | DB13962 | Calcium saccharate                 | -5.17  | -5.171 |
| C16H22N6O4       | DB09421 | Protirelin                         | -5.158 | -5.833 |
| C7H6O3           | DB11268 | Protocatechualdehyde               | -5.156 | -5.263 |
| C20H34O5         | DB12789 | Dinoprost                          | -5.138 | -5.141 |
| C29H32Cl2N2O5S   | DB13125 | Lusutrombopag                      | -5.132 | -5.132 |
| C12H22CuO14      | DB11246 | Copper gluconate                   | -5.129 | -5.129 |
| C14H19BCl2N2O4   | DB09570 | Ixazomib                           | -5.128 | -5.128 |
| C26H25F3N6O5     | DB09335 | Alatrofloxacin                     | -5.117 | -5.254 |
| C25H30N4O9S2     | DB12127 | Sultamicillin                      | -5.117 | -5.325 |
| C17H15FN6O3      | DB14569 | Tedizolid                          | -5.109 | -5.109 |
| C23H38O5         | DB08964 | Gemprost                           | -5.104 | -5.104 |
| C35H46ClN5O9S    | DB11586 | Asunaprevir                        | -5.101 | -5.107 |
| C26H30N6O3       | DB13074 | Macimorelin                        | -5.052 | -6.049 |
| C27H33N2O7S2     | DB13967 | Patent Blue                        | -5.051 | -5.267 |
| C12H16O7         | DB11217 | Arbutin                            | -5.046 | -5.046 |
| C22H28O5         | DB12952 | Methylprednisone                   | -5.041 | -5.041 |
| C12H11I3N2O5     | DB13444 | Ioxitalamic acid                   | -5.031 | -5.031 |
| C23H30N2O4       | DB09209 | Pholcodine                         | -5.021 | -5.122 |
| C32H30F5N3O5     | DB11979 | Elagolix                           | -5.014 | -5.746 |
| C19H22N2O3       | DB13286 | Bumadizone                         | -4.993 | -4.993 |
| C32H43N5O5       | DB11274 | Dihydro-alpha-ergocryptine         | -4.991 | -5.035 |
| C26H34O8         | DB14644 | Methylprednisolone hemisuccinate   | -4.983 | -4.984 |
| C21H19ClN4O4     | DB09078 | Lenvatinib                         | -4.954 | -4.954 |

|                  |         |                                   |        |        |
|------------------|---------|-----------------------------------|--------|--------|
| C14H7Cl2NO3      | DB11644 | Tafamidis                         | -4.953 | -4.953 |
| C26H25F3N6O5     | DB09335 | Alatrofloxacin                    | -4.902 | -6.884 |
| C19H20Cl2N2O5    | DB13258 | Etofamide                         | -4.897 | -4.897 |
| C23H32O6         | DB14539 | Hydrocortisone acetate            | -4.895 | -4.895 |
| C21H30O2         | DB09061 | Cannabidiol                       | -4.884 | -4.884 |
| C22H18FN7O       | DB09054 | Idelalisib                        | -4.883 | -4.904 |
| C23H28N8O4       | DB12483 | Copanlisib                        | -4.88  | -5.311 |
| C14H12O6S        | DB11185 | Sulisobenzone                     | -4.873 | -4.912 |
| C30H26N2O13      | DB11184 | Oftasceine                        | -4.871 | -4.961 |
| C50H71N13O12     | DB11842 | Angiotensin II                    | -4.865 | -5.548 |
| C29H24Cl2N2O7S   | DB11611 | Lifitegrast                       | -4.854 | -4.854 |
| C14H10O3         | DB11157 | Anthralin                         | -4.837 | -4.837 |
| C29H39ClN7O2P    | DB12267 | Brigatinib                        | -4.825 | -4.838 |
| C22H29NO5        | DB09089 | Trimebutine                       | -4.824 | -5.479 |
| C29H33FO9S       | DB14703 | Dexamethasone metasulfobenzoate   | -4.823 | -4.823 |
| C28H40O7         | DB14543 | Hydrocortisone probutate          | -4.818 | -4.818 |
| C65H90N14O19S2   | DB14554 | Dotatate                          | -4.817 | -6.567 |
| C20H41N5O7       | DB13274 | Micronomicin                      | -4.81  | -6.627 |
| C26H32N2O8       | DB13711 | Tritoqualine                      | -4.808 | -5.64  |
| C26H25F3N6O5     | DB09335 | Alatrofloxacin                    | -4.805 | -5.879 |
| C26H36O3         | DB13954 | Estradiol cypionate               | -4.805 | -4.805 |
| C11H8Na4O8P2     | DB09332 | Kappadione                        | -4.802 | -4.939 |
| C24H31FO6        | DB14657 | Paramethasone acetate             | -4.788 | -4.788 |
| C18H32Fe4O31     | DB14520 | Tetraferic tricitrate decahydrate | -4.788 | -4.788 |
| C21H26FNO3       | DB09148 | Florbetaben (18F)                 | -4.781 | -4.785 |
| C42H30N6O12      | DB08949 | Inositol nicotinate               | -4.776 | -4.777 |
| C12H6N2O8SSr2    | DB09267 | Strontium ranelate                | -4.776 | -4.776 |
| C62H80InN12O19S2 | DB11835 | Indium In-111 pentetreotide       | -4.768 | -6.62  |
| C19H28O8         | DB09274 | Artesunate                        | -4.766 | -4.767 |
| C20H25FN2O3      | DB09149 | Florbetapir (18F)                 | -4.75  | -4.754 |
| C17H12I2O3       | DB13277 | Benziodarone                      | -4.75  | -4.758 |
| C20H23NO         | DB13114 | Amitriptylinoxide                 | -4.737 | -4.737 |
| C27H31FN4O8      | DB12329 | Eravacycline                      | -4.729 | -5.967 |
| C16H17N7O2S      | DB11817 | Baricitinib                       | -4.725 | -4.725 |
| C6H5Li3O7        | DB14507 | Lithium citrate                   | -4.724 | -4.724 |
| C6H5K3O7         | DB09125 | Potassium Citrate                 | -4.724 | -4.724 |
| C14H11FN2OS      | DB09151 | Flutemetamol (18F)                | -4.72  | -4.734 |
| C36H51Cl2N3O4    | DB14185 | Aripiprazole lauroxil             | -4.718 | -4.911 |
| C21H31O8P        | DB14542 | Hydrocortisone phosphate          | -4.706 | -4.772 |
| C14H20InN3O10    | DB09425 | Indium In-111 pentetate           | -4.706 | -4.944 |
| C19H20Br2N6O4S   | DB08932 | Macitentan                        | -4.7   | -4.9   |
| C15H10Cl2N4O6    | DB11632 | Opicapone                         | -4.69  | -4.844 |
| C24H31N3OS       | DB13213 | Butaperazine                      | -4.689 | -4.969 |
| C62H80InN12O19S2 | DB11835 | Indium In-111 pentetreotide       | -4.686 | -6.318 |
| C11H12O8P2       | DB14650 | Menadiol diphosphate              | -4.674 | -6.017 |
| C24H31FO6        | DB14649 | Dexamethasone acetate             | -4.672 | -4.672 |
| C17H20N2O5S      | DB13337 | Pheneticillin                     | -4.668 | -4.668 |
| C18H18ClNOS      | DB09225 | Zotepine                          | -4.667 | -4.667 |
| C17H11ClF3N5O3   | DB12301 | Doravirine                        | -4.646 | -4.646 |
| C11H12O8P2       | DB14650 | Menadiol diphosphate              | -4.645 | -4.782 |
| C12H16BNO5S      | DB12107 | Vaborbactam                       | -4.632 | -4.633 |
| C22H17ClN6O      | DB11952 | Duvelisib                         | -4.63  | -4.651 |
| C21H21N3O3       | DB12924 | Ozenoxacin                        | -4.624 | -5.221 |
| C21H31O8P        | DB14542 | Hydrocortisone phosphate          | -4.619 | -5.952 |
| C16H12Cl2N2O2    | DB13872 | Lormetazepam                      | -4.616 | -4.616 |
| C20H25NO2        | DB09123 | Dienogest                         | -4.611 | -4.611 |
| C5H10O5          | DB09419 | Xylose                            | -4.601 | -4.601 |
| C21H27FO5        | DB09378 | Fluprednisolone                   | -4.601 | -4.601 |
| C22H30O4         | DB09015 | Canrenoic acid                    | -4.596 | -4.6   |
| C15H30N2O5       | DB12839 | Pegvaliase                        | -4.592 | -4.592 |
| C30H48O3         | DB13946 | Testosterone undecanoate          | -4.586 | -4.586 |
| C24H25ClFN5O2    | DB11963 | Dacomitinib                       | -4.582 | -4.691 |
| C21H34O5         | DB09081 | Idebenone                         | -4.58  | -4.58  |

|                  |         |                                            |        |        |
|------------------|---------|--------------------------------------------|--------|--------|
| C38H73N21O10S2   | DB12865 | Etelcalcetide                              | -4.569 | -6.778 |
| C15H14N2O2       | DB14575 | Eslicarbazepine                            | -4.567 | -4.567 |
| C28H36ClN5O3S    | DB09063 | Ceritinib                                  | -4.566 | -4.566 |
| C7H11N3O6S       | DB09060 | Avibactam                                  | -4.561 | -4.561 |
| C24H29NO5        | DB09292 | Sacubitril                                 | -4.559 | -4.574 |
| C21H29O8P        | DB14631 | Prednisolone phosphate                     | -4.553 | -4.619 |
| C6H6N2O3         | DB09055 | Acipimox                                   | -4.543 | -4.546 |
| C14H17N5O3S      | DB14203 | Disperse Blue 106                          | -4.54  | -4.54  |
| C25H48N6O10      | DB12615 | Plazomicin                                 | -4.539 | -7.096 |
| C50H68N14O10     | DB11653 | Bremelanotide                              | -4.53  | -5.08  |
| C21H27NO2        | DB08954 | Ifenprodil                                 | -4.525 | -4.525 |
| C16H22N6O4       | DB09421 | Protirelin                                 | -4.524 | -5.168 |
| C23H28O6         | DB14646 | Prednisone acetate                         | -4.522 | -4.522 |
| C6H11FO5         | DB09502 | Fludeoxyglucose F-18                       | -4.522 | -4.524 |
| C22H28F2O4       | DB09095 | Difluocortolone                            | -4.517 | -4.517 |
| C26H40O3         | DB13944 | Testosterone enanthate                     | -4.515 | -4.515 |
| C14H12O2         | DB14020 | Benzoin                                    | -4.51  | -4.51  |
| C16H21NO3        | DB11181 | Homatropine                                | -4.506 | -4.506 |
| C32H35N5O5       | DB09272 | Eluxadoline                                | -4.499 | -5.803 |
| C25H34O8         | DB14545 | Hydrocortisone succinate                   | -4.498 | -4.499 |
| C12H13I3N2O3     | DB09403 | Iocetamic acid                             | -4.496 | -4.497 |
| C22H22N6O5S2     | DB13682 | Cefpirome                                  | -4.493 | -4.493 |
| C22H29NO5        | DB09089 | Trimebutine                                | -4.48  | -4.718 |
| C23H36N2O4       | DB09039 | Eliglustat                                 | -4.48  | -4.486 |
| C32H35N5O5       | DB09272 | Eluxadoline                                | -4.476 | -5.235 |
| C38H49N3O5       | DB11206 | Bemotrizinol                               | -4.467 | -4.467 |
| C19H23N3O        | DB09084 | Benzydamine                                | -4.453 | -4.453 |
| C21H27ClO5       | DB00873 | Loteprednol                                | -4.45  | -4.45  |
| C13H21N5O4       | DB09092 | Xanthinol                                  | -4.446 | -4.524 |
| C65H87LuN14O19S2 | DB13985 | Lutetium Lu 177 dotatate                   | -4.441 | -6.214 |
| C18H22F2N4O      | DB09040 | Efinaconazole                              | -4.44  | -4.471 |
| C18H23NO3        | DB08941 | Isoxsuprine                                | -4.439 | -4.474 |
| C25H48N6O10      | DB12615 | Plazomicin                                 | -4.437 | -5.519 |
| C21H22F2N6O2     | DB14723 | Larotrectinib                              | -4.436 | -4.436 |
| C21H30O4S        | DB09091 | Tixocortol                                 | -4.425 | -4.434 |
| C17H13N3O5S2     | DB13248 | Phthalylsulfathiazole                      | -4.424 | -4.72  |
| C26H38O6         | DB14544 | Hydrocortisone valerate                    | -4.423 | -4.423 |
| C20H25N7O6       | DB11256 | Levomefolic acid                           | -4.421 | -6.653 |
| C24H31NO4        | DB11269 | Diethylamino hydroxybenzoyl hexyl benzoate | -4.419 | -4.431 |
| C25H30N4O9S2     | DB12127 | Sultamicillin                              | -4.418 | -5.139 |
| C19H23N4O6PS     | DB11748 | Benfotiamine                               | -4.416 | -4.596 |
| C14H23N3O10      | DB14007 | Pentetic acid                              | -4.409 | -4.647 |
| C34H53NO11       | DB09049 | Naloxegol                                  | -4.406 | -5.652 |
| C37H47NO12       | DB11753 | Rifamycin                                  | -4.404 | -4.513 |
| C12H18O          | DB13908 | Amylmetacresol                             | -4.403 | -4.403 |
| C16H25NO3        | DB09205 | Moxisylyte                                 | -4.403 | -4.423 |
| C20H25NO         | DB11609 | Normethadone                               | -4.399 | -4.402 |
| C15H19NO2        | DB09071 | Tasimelteon                                | -4.378 | -4.379 |
| C15H17N3O6S      | DB14082 | Betiotide                                  | -4.372 | -4.372 |
| C10H15N3O5       | DB12783 | Benserazide                                | -4.368 | -5.519 |
| C11H8Na4O8P2     | DB09332 | Kappadione                                 | -4.363 | -6.987 |
| C18H29NO3        | DB09351 | Levobetaxolol                              | -4.353 | -4.355 |
| C11H12O8P2       | DB14650 | Menadiol diphosphate                       | -4.353 | -6.977 |
| C16H14O3         | DB08981 | Fenbufen                                   | -4.346 | -4.347 |
| C22H29FO4        | DB08971 | Fluocortolone                              | -4.346 | -4.346 |
| C22H30FO8P       | DB14669 | Betamethasone phosphate                    | -4.344 | -5.684 |
| C16H14N2O3       | DB13501 | Bendazac                                   | -4.344 | -4.344 |
| C24H29N3O8       | DB12035 | Sarecycline                                | -4.343 | -5.429 |
| C20H25N3S        | DB12710 | Perazine                                   | -4.343 | -4.623 |
| C21H28O2         | DB09389 | Norgestrel                                 | -4.333 | -4.333 |
| C11H13NO4        | DB11102 | N-acetyltyrosine                           | -4.329 | -4.329 |
| C16H28N2O2       | DB13288 | Tromantadine                               | -4.329 | -4.342 |
| C10H12ClNO4      | DB14656 | Chlorphenesin carbamate                    | -4.327 | -4.327 |



|                  |         |                              |        |        |
|------------------|---------|------------------------------|--------|--------|
| C17H16N2O3       | DB09119 | Eslicarbazepine acetate      | -4.324 | -4.324 |
| C14H14N4O4       | DB12954 | Terizidone                   | -4.323 | -4.323 |
| C15H10Cl2N4O6    | DB11632 | Opicapone                    | -4.319 | -5.279 |
| C29H38N4O6S      | DB09320 | Procaine benzylpenicillin    | -4.316 | -4.316 |
| C21H24O4         | DB14083 | Bisphenol A diglycidyl ether | -4.316 | -4.316 |
| C20H19FN4O4      | DB09047 | Finaxofloxacin               | -4.314 | -5.237 |
| C12H14CaO12      | DB14483 | Calcium ascorbate            | -4.313 | -4.313 |
| C19H12O8         | DB11994 | Diacerein                    | -4.309 | -4.309 |
| C65H87LuN14O19S2 | DB13985 | Lutetium Lu 177 dotatate     | -4.308 | -5.644 |
| C24H23FN4O3      | DB09074 | Olaparib                     | -4.306 | -4.306 |
| C10H14O3         | DB13583 | Mephenesin                   | -4.303 | -4.303 |
| C62H80InN12O19S2 | DB11835 | Indium In-111 pentetreotide  | -4.302 | -5.538 |
| C12H14O4         | DB11285 | Ethyl ferulate               | -4.294 | -4.295 |
| C16H18N2O7S2     | DB12343 | Temocillin                   | -4.288 | -4.288 |
| C50H67N7O8       | DB09296 | Ombitasvir                   | -4.271 | -4.271 |
| C22H27F3O4S      | DB13867 | Fluticasone                  | -4.264 | -4.264 |
| C20H33N3O3S      | DB09097 | Quinagolide                  | -4.256 | -4.295 |
| C24H38N2O4       | DB11915 | Valbenazine                  | -4.25  | -4.498 |
| C13H21N5O4       | DB09092 | Xanthinol                    | -4.246 | -5.488 |
| C23H29NO3        | DB12278 | Propiverine                  | -4.242 | -4.25  |
| C14H14O2         | DB14120 | Phenylethyl resorcinol       | -4.235 | -4.238 |
| C32H34N4O6       | DB11691 | Naldemedine                  | -4.227 | -4.618 |
| C18H12ClF3N4O4   | DB11943 | Delafloxacin                 | -4.227 | -4.271 |
| C40H53N7O5S2     | DB09065 | Cobicistat                   | -4.224 | -4.754 |
| C25H48N6O10      | DB12615 | Plazomicin                   | -4.223 | -5.595 |
| C20H28O          | DB12474 | Lynestrenol                  | -4.22  | -4.22  |
| C3H7Na2O6P       | DB09561 | Sodium glycerophosphate      | -4.218 | -4.325 |
| C24H18F2N2O5     | DB09280 | Lumacaftor                   | -4.216 | -4.216 |
| C21H29O8P        | DB14631 | Prednisolone phosphate       | -4.214 | -5.55  |
| C24H29Cl2FO5     | DB08973 | Fluclorolone acetoneide      | -4.208 | -4.208 |
| C21H20O6         | DB11672 | Curcumin                     | -4.201 | -4.544 |
| C35H41N5O5       | DB13345 | Dihydroergocristine          | -4.199 | -4.247 |
| C14H18O3         | DB09118 | Stiripentol                  | -4.198 | -4.198 |
| C18H21N3O        | DB13225 | Dibenzepin                   | -4.179 | -4.193 |
| C3H6BrNO4        | DB13960 | Bronopol                     | -4.179 | -4.179 |
| C20H15NO4        | DB09219 | Bisoxatin                    | -4.179 | -4.183 |
| C25H29NO3        | DB11226 | Ethylhexyl methoxycrylene    | -4.174 | -4.174 |
| C10H9N5O         | DB11336 | Kinetin                      | -4.174 | -4.194 |
| C18H37N5O8       | DB13270 | Dibekacin                    | -4.17  | -5.712 |
| C11H10FNO2S      | DB13228 | Flosequinan                  | -4.165 | -4.165 |
| C9H11ClN4O2      | DB09343 | Tipiracil                    | -4.165 | -4.34  |
| C21H19ClFNO4S    | DB11629 | Laropiprant                  | -4.161 | -4.163 |
| C13H10N2O3S      | DB11115 | Ensulizole                   | -4.157 | -4.568 |
| C30H32F6N4O      | DB09048 | Netupitant                   | -4.157 | -4.183 |
| BH3O3            | DB11326 | Boric acid                   | -4.155 | -4.155 |
| C23H26FN6O9P     | DB12010 | Fostamatinib                 | -4.152 | -4.215 |
| C27H36O7         | DB14643 | Methylprednisolone aceponate | -4.15  | -4.15  |
| C16H22N6O4       | DB09421 | Protirelin                   | -4.147 | -4.781 |
| C19H17F6N7O      | DB13874 | Enasidenib                   | -4.145 | -4.145 |
| C21H27N          | DB09016 | Butriptyline                 | -4.142 | -4.143 |
| C15H23N3OS       | DB13858 | Dimazole                     | -4.138 | -4.158 |
| C49H62N10O16S3   | DB09142 | Sincalide                    | -4.136 | -6.257 |
| C21H21N3O3       | DB12924 | Ozenoxacin                   | -4.135 | -4.494 |
| C20H19FN4O4      | DB09047 | Finaxofloxacin               | -4.132 | -4.335 |
| C14H22N2O3       | DB09069 | Trimetazidine                | -4.126 | -4.528 |
| C25H36O6         | DB14540 | Hydrocortisone butyrate      | -4.113 | -4.113 |
| C20H27NO5        | DB13279 | Carbocromen                  | -4.111 | -4.114 |
| C22H30FO8P       | DB14669 | Betamethasone phosphate      | -4.11  | -4.175 |
| C24H29N7O2       | DB09073 | Palbociclib                  | -4.109 | -4.579 |
| C37H47NO12       | DB11753 | Rifamycin                    | -4.109 | -6.779 |
| C19H20N4O        | DB11793 | Niraparib                    | -4.104 | -4.104 |
| C26H26F3N3O3     | DB09143 | Sonidegib                    | -4.097 | -4.097 |
| C10H14Cl2NO2PS   | DB11768 | Zytron                       | -4.095 | -4.095 |

|                 |         |                                    |        |        |
|-----------------|---------|------------------------------------|--------|--------|
| C11H16N8O8      | DB14075 | Imidurea                           | -4.095 | -5.962 |
| C46H65N13O12S2  | DB14642 | Lypressin                          | -4.092 | -4.849 |
| C38H50N6O9S     | DB11575 | Grazoprevir                        | -4.091 | -4.097 |
| C27H33N2O7S2    | DB13967 | Patent Blue                        | -4.09  | -4.799 |
| HNao3S          | DB14015 | Sodium bisulfite                   | -4.09  | -4.09  |
| C9H12N2S        | DB12667 | Protonamide                        | -4.09  | -4.09  |
| C18H37N5O8      | DB13270 | Dibekacin                          | -4.087 | -4.313 |
| C17H28N2O       | DB08987 | Etidocaine                         | -4.087 | -4.102 |
| CH6O7P2         | DB14159 | Oxidronic acid                     | -4.085 | -4.196 |
| CH6O7P2Tc       | DB09139 | Technetium Tc-99m oxidronate       | -4.085 | -4.196 |
| C33H57N3O9      | DB08965 | Fusafungine                        | -4.08  | -4.08  |
| C23H17FN6O      | DB11791 | Capmatinib                         | -4.074 | -4.08  |
| C27H40O3        | DB13943 | Testosterone cypionate             | -4.072 | -4.072 |
| C12H10Ca3O14    | DB11093 | Calcium Citrate                    | -4.067 | -4.067 |
| C15H12F3NO4S    | DB12938 | Isoxoflutole                       | -4.065 | -4.065 |
| C21H21N3O3      | DB12924 | Ozenoxacin                         | -4.061 | -5.769 |
| C12H8BiK5O14    | DB09275 | Bismuth subcitrate potassium       | -4.058 | -4.058 |
| C12H14MgO12     | DB14484 | Magnesium ascorbate                | -4.057 | -4.057 |
| C12H14N2O7      | DB14486 | Niacinamide ascorbate              | -4.051 | -4.051 |
| C8H8O3          | DB09543 | Methyl salicylate                  | -4.05  | -4.138 |
| C11H9I3N2O4     | DB09133 | Iothalamic acid                    | -4.047 | -4.047 |
| C59H92O4        | DB11340 | Ubiquinol                          | -4.045 | -4.045 |
| C7H8O2          | DB11359 | Guaiaacol                          | -4.045 | -4.045 |
| C49H55N9O7      | DB11574 | Elbasvir                           | -4.037 | -5.425 |
| C10H12CaN2Na2O8 | DB14598 | Edetate calcium disodium anhydrous | -4.03  | -4.045 |
| C16H14O3        | DB09214 | Dexketoprofen                      | -4.03  | -4.031 |
| C11H12I3NO2     | DB08946 | Iopanoic acid                      | -4.022 | -4.022 |
| C15H18I3NO3     | DB09340 | Tyropanoic acid                    | -4.02  | -4.021 |
| C23H32Cl2NO6P   | DB14674 | Estramustine phosphate             | -4.012 | -4.906 |
| C11H16N2O5      | DB13421 | Edoxudine                          | -4.011 | -4.012 |
| C12H11I3N2O4    | DB09346 | Metrizoic acid                     | -3.998 | -3.998 |
| C16H22I2N6O4S   | DB09546 | Iobenguane sulfate I-123           | -3.986 | -3.986 |
| CH6O6P2         | DB14078 | Medronic acid                      | -3.983 | -4.296 |
| CH6O8P2Tc       | DB09138 | Technetium Tc-99m medronate        | -3.983 | -4.296 |
| C65H90N14O19S2  | DB14554 | Dotatate                           | -3.978 | -5.719 |
| C18H27NO3       | DB09120 | Zucapsaicin                        | -3.976 | -3.976 |
| C32H35N5O5      | DB09272 | Eluxadoline                        | -3.975 | -5.268 |
| C18H24Fe4O42P6  | DB13995 | Ferric pyrophosphate citrate       | -3.973 | -3.973 |
| C21H35N2O3      | DB09376 | Lapyrium                           | -3.969 | -3.969 |
| C26H33NO6       | DB09236 | Lacidipine                         | -3.962 | -3.962 |
| C21H45N3        | DB08958 | Hexetidine                         | -3.962 | -4.355 |
| C25H31NO6       | DB11921 | Deflazacort                        | -3.96  | -3.961 |
| C21H19FN6O2     | DB12130 | Lorlatinib                         | -3.959 | -4.454 |
| C28H22ClF3N6O3  | DB14568 | Ivosidenib                         | -3.957 | -3.957 |
| C15H9FO2        | DB13136 | Fluindione                         | -3.957 | -3.958 |
| C19H20Br2N6O4S  | DB08932 | Macitentan                         | -3.952 | -4.694 |
| C14H27N3O2      | DB13247 | Pramiracetam                       | -3.949 | -3.953 |
| C8H14CaO10      | DB11168 | Calcium threonate                  | -3.943 | -3.943 |
| C29H44N8O3      | DB12141 | Gilteritinib                       | -3.935 | -6.195 |
| C22H24N2O2      | DB09488 | Acrivastine                        | -3.932 | -3.938 |
| C12H10O14Zn3    | DB11154 | Zinc citrate                       | -3.929 | -3.929 |
| C6H5Na3O7       | DB09154 | Sodium citrate                     | -3.929 | -3.929 |
| C14H27NaO5S     | DB13157 | Sodium lauryl sulfoacetate         | -3.926 | -3.926 |
| C25H26F6N2O2    | DB09291 | Rolapitant                         | -3.926 | -5.142 |
| C14H12O4        | DB11221 | Dioxybenzone                       | -3.912 | -3.974 |
| C12H24N2O4S2    | DB11164 | Bicisate                           | -3.91  | -4.151 |
| C24H34O5        | DB11622 | Dehydrocholic acid                 | -3.909 | -3.913 |
| C6H10O4         | DB09401 | Isosorbide                         | -3.908 | -3.908 |
| C24H30ClN7O4S   | DB09075 | Edoxaban                           | -3.903 | -4.573 |
| C27H30Cl2O6     | DB14512 | Mometasone furoate                 | -3.903 | -3.903 |
| C21H28O2        | DB09070 | Tibolone                           | -3.9   | -3.9   |
| C32H35N5O5      | DB09272 | Eluxadoline                        | -3.895 | -4.622 |
| C22H26ClFO4     | DB13158 | Clobetasone                        | -3.888 | -3.888 |

|                |         |                                             |        |        |
|----------------|---------|---------------------------------------------|--------|--------|
| C28H37N3O3     | DB11591 | Bilastine                                   | -3.883 | -3.925 |
| C18H22N2       | DB14196 | N-Cyclohexyl-N'-phenyl-1,4-phenylenediamine | -3.882 | -4.08  |
| C49H55N9O7     | DB11574 | Elbasvir                                    | -3.875 | -5.286 |
| C6H11FeNO7     | DB09501 | Ferric ammonium citrate                     | -3.874 | -3.874 |
| C20H26O2       | DB09371 | Norethynodrel                               | -3.868 | -3.868 |
| C15H20O3       | DB13063 | Parthenolide                                | -3.865 | -3.865 |
| C29H50O2       | DB14476 | DL-alpha-Tocopherol                         | -3.865 | -3.865 |
| C31H41N5O5     | DB11273 | Dihydroergocornine                          | -3.861 | -3.904 |
| C14H12ClNO2    | DB09216 | Tolfenamic Acid                             | -3.858 | -3.859 |
| CH6O6P2        | DB14078 | Medronic acid                               | -3.856 | -4.382 |
| C18H22N2S      | DB09068 | Vortioxetine                                | -3.855 | -3.862 |
| C21H15F4N5O2S  | DB11901 | Apalutamide                                 | -3.849 | -3.849 |
| C10H13N3O2     | DB13211 | Guanoxan                                    | -3.843 | -3.843 |
| C26H32N4O4S    | DB11362 | Selexipag                                   | -3.842 | -3.847 |
| C20H23ClN2O4   | DB09555 | Dexchlorpheniramine maleate                 | -3.839 | -3.839 |
| C26H26ClN3     | DB11614 | Rupatadine                                  | -3.83  | -3.953 |
| O7P2Tc         | DB09165 | Technetium Tc-99m pyrophosphate             | -3.828 | -4.061 |
| C23H32O2       | DB09124 | Medrogestone                                | -3.827 | -3.827 |
| C7H6Cl2O       | DB13269 | Dichlorobenzyl alcohol                      | -3.824 | -3.824 |
| C27H32F2N8     | DB12001 | Abemaciclib                                 | -3.818 | -4.02  |
| C8H8O3         | DB13218 | Mandelic acid                               | -3.815 | -3.815 |
| C20H19FN4O4    | DB09047 | Finafloxacin                                | -3.815 | -6.185 |
| C13H14Cl2O3    | DB09064 | Ciprofibrate                                | -3.814 | -3.814 |
| C25H27N3O2S    | DB09128 | Brexiprazole                                | -3.812 | -3.948 |
| C27H23F2N3O7S  | DB13997 | Baloxavir marboxil                          | -3.811 | -3.811 |
| C9H10O4        | DB11323 | Glycol salicylate                           | -3.811 | -3.812 |
| C3H7CaO6P      | DB11264 | Calcium glycerophosphate                    | -3.809 | -3.914 |
| C26H23N7O2     | DB11703 | Acalabrutinib                               | -3.803 | -3.817 |
| C17H26N4O3S2   | DB08966 | Fursultiamine                               | -3.803 | -3.895 |
| C23H36O3       | DB14655 | Drostanolone propionate                     | -3.793 | -3.793 |
| C27H42Cl2N2O6  | DB14658 | Chloramphenicol palmitate                   | -3.778 | -3.778 |
| C27H38O6       | DB14632 | Prednisolone tebutate                       | -3.776 | -3.776 |
| C27H18InN3O3   | DB09473 | Indium In-111 oxyquinoline                  | -3.775 | -3.793 |
| C22H32N2O2     | DB12313 | Dopexamine                                  | -3.774 | -3.774 |
| C18H14Cl4N2O   | DB08943 | Isoconazole                                 | -3.773 | -4.496 |
| C22H17F2N5OS   | DB11633 | Isavuconazole                               | -3.771 | -3.771 |
| C12H14O12Zn    | DB14485 | Zinc ascorbate                              | -3.753 | -3.753 |
| C6H7NaO6       | DB14482 | Sodium ascorbate                            | -3.753 | -3.753 |
| C12H14FeO12    | DB14490 | Ferrous ascorbate                           | -3.748 | -3.748 |
| C28H41N3O3     | DB12532 | Oxetacaine                                  | -3.741 | -5.055 |
| C21H34O2       | DB11859 | Brexanolone                                 | -3.74  | -3.74  |
| C17H14BrN3O2S  | DB11560 | Lesinurad                                   | -3.736 | -3.736 |
| C14H22N2O3     | DB09069 | Trimetazidine                               | -3.734 | -4.189 |
| C19H21NS       | DB09167 | Dosulepin                                   | -3.732 | -3.736 |
| C32H55N4O      | DB09552 | Thonzonium                                  | -3.726 | -3.726 |
| C17H15BrF2N4O3 | DB11967 | Binimetinib                                 | -3.725 | -6.233 |
| C20H41N5O7     | DB13274 | Micronomicin                                | -3.717 | -5.328 |
| C15H26O        | DB13153 | Levomenol                                   | -3.717 | -3.717 |
| C10H22O3       | DB13163 | Terpin hydrate                              | -3.714 | -3.714 |
| C26H38O4       | DB14677 | Gestonorone caproate                        | -3.712 | -3.712 |
| C22H28ClFO4    | DB11750 | Clobetasol                                  | -3.709 | -3.709 |
| C10H11I2NO3    | DB09366 | Propylidone                                 | -3.708 | -3.708 |
| C11H12N2OS2    | DB14202 | Morpholinylmercaptobenzothiazole            | -3.708 | -3.708 |
| C10H15NO2      | DB11610 | Oxilofrine                                  | -3.707 | -3.719 |
| C9H7NO         | DB11145 | Oxyquinoline                                | -3.707 | -3.725 |
| C30H50O2       | DB14555 | Ursadiol                                    | -3.705 | -3.705 |
| C36H84O10P4Tc  | DB09160 | Technetium Tc-99m tetrofosmin               | -3.705 | -4.298 |
| C10H13NO4S2    | DB13284 | Meticrane                                   | -3.704 | -3.705 |
| C21H20O6       | DB11672 | Curcumin                                    | -3.701 | -4.934 |
| C27H42NO2      | DB11125 | Benzethonium                                | -3.696 | -3.696 |
| C12H12N4O3     | DB11989 | Benznidazole                                | -3.691 | -3.691 |
| C16H16N4O      | DB14753 | Hydroxystilbamidine                         | -3.688 | -3.688 |
| C13H16ClNO     | DB11823 | Esketamine                                  | -3.682 | -3.786 |

|                  |         |                                     |        |        |
|------------------|---------|-------------------------------------|--------|--------|
| C12H18O2         | DB11254 | Hexylresorcinol                     | -3.681 | -3.682 |
| C10H8BrNO        | DB13222 | Tilbroquinol                        | -3.68  | -3.886 |
| C29H34NO2        | DB09076 | Umeclidinium                        | -3.674 | -3.674 |
| C14H18O          | DB14175 | alpha-Amyl cinnamaldehyde           | -3.674 | -3.674 |
| C25H35NO5        | DB12554 | Mebeverine                          | -3.674 | -3.677 |
| C4H4Na2O6        | DB13707 | Sodium tartrate                     | -3.67  | -3.67  |
| C18H37N5O8       | DB13270 | Dibekacin                           | -3.669 | -5.235 |
| C12H18O3         | DB11299 | Vanillyl butyl ether                | -3.668 | -3.669 |
| C17H26N2O4S      | DB13273 | Sultopride                          | -3.666 | -3.667 |
| C65H87LuN14O19S2 | DB13985 | Lutetium Lu 177 dotatate            | -3.663 | -5.293 |
| C7H8O2           | DB09516 | Mequinol                            | -3.663 | -3.663 |
| C44H32N4O4       | DB11630 | Temoporfin                          | -3.662 | -3.662 |
| C10H12O2         | DB14188 | Isoeugenol                          | -3.661 | -3.662 |
| C26H41BrNO4      | DB09090 | Pinaverium                          | -3.651 | -3.651 |
| C30H29ClN6O3     | DB11828 | Neratinib                           | -3.649 | -3.831 |
| C6H10N2O2        | DB09210 | Piracetam                           | -3.646 | -3.646 |
| C10H14N2Na2O8    | DB14600 | Edetate disodium anhydrous          | -3.643 | -3.657 |
| C38H73N21O10S2   | DB12865 | Etelcalcetide                       | -3.642 | -3.657 |
| C29H33FN2O4      | DB09030 | Vorapaxar                           | -3.639 | -3.65  |
| C27H26ClF3N6O3   | DB12095 | Telotristat ethyl                   | -3.634 | -4.072 |
| C5H7N3           | DB11640 | Amifampridine                       | -3.632 | -3.635 |
| C27H32F2N8       | DB12001 | Abemaciclib                         | -3.617 | -4.436 |
| C45H54F2N4O8     | DB11641 | Vinflunine                          | -3.614 | -4.975 |
| C25H26F6N2O2     | DB09291 | Rolapitant                          | -3.603 | -3.684 |
| C26H27N3O5S      | DB09183 | Dasabuvir                           | -3.603 | -3.613 |
| C17H20N2O2       | DB11699 | Tropisetron                         | -3.593 | -3.598 |
| C18H22O          | DB11219 | Enzacamene                          | -3.584 | -3.584 |
| C18H12ClF3N4O4   | DB11943 | Delafloxacin                        | -3.581 | -5.147 |
| C23H23ClN6O2     | DB09034 | Suvorexant                          | -3.57  | -3.57  |
| C15H18N2         | DB14195 | 4-(Isopropylamino)diphenylamine     | -3.566 | -3.838 |
| C20H19FN8O2      | DB08931 | Riociguat                           | -3.565 | -3.567 |
| C17H24O3         | DB11201 | Menthyl salicylate                  | -3.564 | -3.565 |
| C21H18ClNO6      | DB13783 | Acemetacin                          | -3.559 | -3.559 |
| C17H16FN6O6P     | DB09042 | Tedizolid phosphate                 | -3.549 | -4.742 |
| C40H53N7O5S2     | DB09065 | Cobicistat                          | -3.541 | -3.853 |
| C57H65F5N10O8    | DB13878 | Pibrentasvir                        | -3.538 | -4.053 |
| C6H6O2           | DB11085 | Resorcinol                          | -3.537 | -3.541 |
| C18H21NO         | DB11584 | Pipradrol                           | -3.535 | -3.539 |
| C13H18O2         | DB09213 | Dexibuprofen                        | -3.526 | -3.527 |
| C9H13NO          | DB09352 | Hydroxyamphetamine                  | -3.522 | -3.522 |
| C15H24N2O2       | DB09085 | Tetracaine                          | -3.52  | -3.53  |
| C19H27NO3        | DB12161 | Deutetabenazine                     | -3.517 | -3.567 |
| C36H84O10P4Tc    | DB09160 | Technetium Tc-99m tetrofosmin       | -3.514 | -4.06  |
| C35H43N5O4       | DB11855 | Revefenacin                         | -3.513 | -3.585 |
| C14H30O4S        | DB11328 | Tetradecyl hydrogen sulfate (ester) | -3.511 | -3.511 |
| C26H26N2O6S      | DB09319 | Carindacillin                       | -3.505 | -3.753 |
| C18H24N2O5       | DB09477 | Enalaprilat                         | -3.499 | -4.475 |
| C13H10N2O3S      | DB11115 | Ensulizole                          | -3.494 | -4.061 |
| C17H16FN6O6P     | DB09042 | Tedizolid phosphate                 | -3.492 | -3.577 |
| C18H24NO4        | DB11315 | Methscopolamine                     | -3.492 | -3.492 |
| C25H25F3N4O6     | DB11637 | Delamanid                           | -3.49  | -3.501 |
| C20H41N5O7       | DB13274 | Micronomicin                        | -3.49  | -5.007 |
| C23H28N8O4       | DB12483 | Copanlisib                          | -3.49  | -3.905 |
| C22H27ClFN7O4S   | DB11718 | Encorafenib                         | -3.486 | -3.875 |
| AlO4P            | DB14517 | Aluminium phosphate                 | -3.48  | -5.089 |
| HNa2O4P          | DB14502 | Sodium phosphate, dibasic           | -3.48  | -5.089 |
| CaH5O6P          | DB14481 | Calcium phosphate dihydrate         | -3.48  | -5.089 |
| Ca3O8P2          | DB11348 | Calcium Phosphate                   | -3.48  | -5.089 |
| H2NaO4P          | DB09449 | Sodium phosphate, monobasic         | -3.48  | -5.089 |
| HK2O4P           | DB09414 | Dipotassium phosphate               | -3.48  | -5.089 |
| H2KO4P           | DB09413 | Monopotassium phosphate             | -3.48  | -5.089 |
| H3O4P            | DB09394 | Phosphoric acid                     | -3.48  | -5.089 |
| C24H31N3OS       | DB13213 | Butaperazine                        | -3.477 | -4.087 |

|                  |         |                                                |        |        |
|------------------|---------|------------------------------------------------|--------|--------|
| C30H44N2O10      | DB13265 | Hexobendine                                    | -3.47  | -6.002 |
| C15H19BrN2O5Tc   | DB09137 | Technetium Tc-99m mebprofenin                  | -3.469 | -3.514 |
| C15H20O3         | DB11207 | Amiloxate                                      | -3.461 | -3.461 |
| C19H15F3N2O3     | DB12020 | Tecovirimat                                    | -3.46  | -3.46  |
| C12H17NO3        | DB13346 | Bufexamac                                      | -3.456 | -3.461 |
| C19H14F2N6O      | DB11760 | Talazoparib                                    | -3.454 | -3.454 |
| C18H40O4P2       | DB11180 | Tetrofosmin                                    | -3.452 | -4.045 |
| C18H26O3         | DB09496 | Octinoxate                                     | -3.452 | -3.452 |
| C17H27NO3        | DB09345 | Pramocaine                                     | -3.438 | -3.838 |
| C11H11ClO3       | DB13167 | Alclofenac                                     | -3.438 | -3.438 |
| C17H28O5         | DB13851 | Artemotil                                      | -3.437 | -3.437 |
| C19H31N          | DB12728 | Fenpropidin                                    | -3.434 | -3.435 |
| C18H21ClN2       | DB08936 | Chlorcyclizine                                 | -3.43  | -3.824 |
| C24H39N3O3Si3    | DB11585 | Drometrizole trisiloxane                       | -3.428 | -3.428 |
| C49H55N9O7       | DB11574 | Elbasvir                                       | -3.425 | -4.793 |
| C18H18ClN3S      | DB13256 | Clothiapine                                    | -3.425 | -3.458 |
| C21H46NO4P       | DB09031 | Miltefosine                                    | -3.423 | -3.423 |
| C12H17NO3        | DB13278 | Bucetin                                        | -3.423 | -3.423 |
| C13H19NO3        | DB09185 | Viloxazine                                     | -3.422 | -3.445 |
| CH6O7P2          | DB14159 | Oxidronic acid                                 | -3.416 | -4.461 |
| CH6O7P2Tc        | DB09139 | Technetium Tc-99m oxidronate                   | -3.416 | -4.461 |
| C6H5ClO          | DB13154 | Parachlorophenol                               | -3.414 | -3.417 |
| C20H19FN4O4      | DB09047 | Finafloxacin                                   | -3.411 | -5.073 |
| C21H21N3O3       | DB12924 | Ozenoxacin                                     | -3.409 | -5.457 |
| C32H34N4O6       | DB11691 | Naldemedine                                    | -3.401 | -3.925 |
| C18H15NO8S2      | DB09268 | Picosulfuric acid                              | -3.399 | -3.411 |
| C19H22F3N5O2S    | DB12015 | Alpelisib                                      | -3.398 | -3.398 |
| C31H35F6N4O5P    | DB14019 | Fosnetupitant                                  | -3.395 | -3.416 |
| C20H41N5O7       | DB13274 | Micronomicin                                   | -3.393 | -3.577 |
| C12H17NO         | DB11282 | Diethyltoluamide                               | -3.392 | -3.392 |
| H2O3S2           | DB09499 | Thiosulfuric acid                              | -3.387 | -3.387 |
| C8H9ClO          | DB11121 | Chloroxylenol                                  | -3.386 | -3.387 |
| C17H21NO         | DB11160 | Phenyltoloxamine                               | -3.384 | -3.404 |
| C29H40N4O7       | DB12455 | Omadacycline                                   | -3.383 | -5.321 |
| C10H7Cl2NO       | DB13306 | Chlorquinaldol                                 | -3.382 | -4.172 |
| C4H9Al2ClN4O7    | DB11205 | Alcloxa                                        | -3.38  | -3.654 |
| C8H11NO5S        | DB09324 | Sulbactam                                      | -3.379 | -3.379 |
| CH6O8P2Tc        | DB09138 | Technetium Tc-99m medronate                    | -3.379 | -3.906 |
| C28H27N3O3       | DB13931 | Netarsudil                                     | -3.375 | -5.737 |
| C7H7BrN4O2       | DB14018 | Bromotheophylline                              | -3.374 | -3.405 |
| C27H33N2         | DB11279 | Brilliant green cation                         | -3.371 | -3.586 |
| C31H33N5O4       | DB09079 | Nintedanib                                     | -3.368 | -4.223 |
| C21H19FN6O2      | DB12130 | Lorlatinib                                     | -3.362 | -3.699 |
| C20H38O7S        | DB11089 | Docusate                                       | -3.361 | -3.361 |
| C12H13I3N2O2     | DB09333 | Iopodic acid                                   | -3.356 | -3.438 |
| C19H30O5         | DB09350 | Piperonyl butoxide                             | -3.356 | -3.356 |
| C18H14Cl4N2O     | DB08943 | Isoconazole                                    | -3.341 | -3.548 |
| C38H74NaO10P     | DB14105 | Sodium 1,2-Dipalmitoyl-sn-glycero-3-phospho-   | -3.337 | -3.337 |
| C65H87LuN14O19S2 | DB13985 | Lutetium Lu 177 dotatate                       | -3.334 | -5.15  |
| C27H36N2O5       | DB09083 | Ivabradine                                     | -3.329 | -3.33  |
| C45H54F2N4O8     | DB11641 | Vinflunine                                     | -3.323 | -5.54  |
| C13H12N2O3S      | DB09355 | Sulfabenzamide                                 | -3.321 | -3.321 |
| C13H16N2S2       | DB14200 | Thiohexam                                      | -3.319 | -3.319 |
| C19H18FN3O       | DB12332 | Rucaparib                                      | -3.314 | -3.329 |
| C10H12O2         | DB09086 | Eugenol                                        | -3.311 | -3.311 |
| C62H80InN12O19S2 | DB11835 | Indium In-111 pentetreotide                    | -3.31  | -5.086 |
| C40H77O10P       | DB11331 | 1-Palmitoyl-2-oleoyl-sn-glycero-3-(phospho-rac | -3.309 | -3.309 |
| C32H35N5O5       | DB09272 | Eluxadoline                                    | -3.307 | -4.739 |
| C23H30N8O        | DB11730 | Ribociclib                                     | -3.305 | -3.374 |
| C3H7Na2O6P       | DB09561 | Sodium glycerophosphate                        | -3.296 | -4.363 |
| C14H8N2S4        | DB14201 | 2,2'-Dibenzothiazyl disulfide                  | -3.292 | -3.292 |
| C14H10O4         | DB09096 | Benzoyl peroxide                               | -3.289 | -3.289 |
| C4H6O4S2         | DB14089 | Dimercaptosuccinic acid                        | -3.288 | -3.288 |

|                  |         |                                   |        |        |
|------------------|---------|-----------------------------------|--------|--------|
| C21H23BrFNO2     | DB12401 | Bromperidol                       | -3.288 | -3.301 |
| C12H10Mg3O14     | DB11110 | Magnesium citrate                 | -3.28  | -3.28  |
| C23H36N2O4       | DB09039 | Eliglustat                        | -3.277 | -5.961 |
| C8H9FN2O3        | DB09256 | Tegafur                           | -3.277 | -3.306 |
| C11H18N2O9       | DB12362 | Diaminopropanol tetraacetic acid  | -3.264 | -4.694 |
| C29H28F4N4O4     | DB12070 | Letermovir                        | -3.264 | -3.264 |
| C24H38N2O4       | DB11915 | Valbenazine                       | -3.262 | -3.937 |
| C10H14N2O4       | DB13253 | Proxibarbal                       | -3.261 | -4.577 |
| C12H13FN4O5      | DB09327 | Tegafur-uracil                    | -3.252 | -3.281 |
| C49H54N8O8       | DB11613 | Velpatasvir                       | -3.252 | -4.637 |
| C21H22N6O        | DB11978 | Glasdegib                         | -3.251 | -4.283 |
| C57H65F5N10O8    | DB13878 | Pibrentasvir                      | -3.239 | -4.382 |
| C13H18ClN3O4S2   | DB13532 | Cyclopenothiazide                 | -3.234 | -3.244 |
| C49H54N8O8       | DB11613 | Velpatasvir                       | -3.233 | -3.837 |
| C10H20O2         | DB14187 | Hydroxycitronellal                | -3.231 | -3.231 |
| C8H10N6          | DB12945 | Dihydralazine                     | -3.231 | -3.604 |
| C16H23NO2        | DB08988 | Ethoheptazine                     | -3.23  | -3.236 |
| C12H19NO         | DB11587 | Etafedrine                        | -3.224 | -3.275 |
| C10H8OS3         | DB13853 | Anethole trithione                | -3.221 | -3.221 |
| C25H46N          | DB11583 | Cetalkonium                       | -3.22  | -3.22  |
| C21H22N6O        | DB11978 | Glasdegib                         | -3.22  | -3.846 |
| C50H68N14O10     | DB11653 | Bremelanotide                     | -3.22  | -4.031 |
| C7H10O6S3        | DB13267 | Ritiometan                        | -3.218 | -3.219 |
| C14H9Cl3N2OS     | DB12245 | Triclabendazole                   | -3.218 | -3.399 |
| C16H22N4O        | DB11235 | Thonzylamine                      | -3.215 | -3.22  |
| C10H14N2O2       | DB14754 | Solriamfetol                      | -3.213 | -3.231 |
| C20H31NO3        | DB11186 | Pentoxifyverine                   | -3.211 | -3.218 |
| C11H15NO2        | DB11148 | Butamben                          | -3.21  | -3.21  |
| C6H10CaO6        | DB13231 | Calcium lactate                   | -3.208 | -3.208 |
| C3H5KO3          | DB09483 | Potassium lactate                 | -3.208 | -3.208 |
| C10H14N2O4       | DB13253 | Proxibarbal                       | -3.206 | -3.351 |
| C14H19N3O        | DB13216 | Oxolamine                         | -3.206 | -3.223 |
| C10H12O4         | DB12328 | Cantharidin                       | -3.203 | -3.203 |
| C20H22O3         | DB09495 | Avobenzone                        | -3.201 | -3.482 |
| C4H6N4O3         | DB11100 | Allantoin                         | -3.199 | -3.469 |
| C21H18F3N3O5     | DB11799 | Bictegravir                       | -3.198 | -5.166 |
| C23H32Cl2NO6P    | DB14674 | Estramustine phosphate            | -3.192 | -3.341 |
| C8H10O2          | DB11304 | Phenoxyethanol                    | -3.186 | -3.186 |
| C16H10N2O8S2     | DB11577 | Indigotindisulfonic Acid          | -3.183 | -3.183 |
| C20H2Br4Cl4Na2O5 | DB13911 | Phloxine B                        | -3.179 | -3.18  |
| C9H10O           | DB14186 | Cinnamyl alcohol                  | -3.169 | -3.169 |
| C31H41N5O5       | DB11273 | Dihydroergocornine                | -3.166 | -4.904 |
| C14H11Cl2NO4     | DB14638 | Diloxanide furoate                | -3.162 | -3.162 |
| C22H23NO4S2      | DB13166 | Zofenopril                        | -3.156 | -3.156 |
| C9H5I2NO         | DB09115 | Diiodohydroxyquinoline            | -3.153 | -3.732 |
| C8H8O2           | DB09269 | Phenylacetic acid                 | -3.149 | -3.15  |
| C20H4Cl4I4O5     | DB11182 | Rose bengal free acid             | -3.144 | -3.149 |
| C18H12Cl2N2O     | DB12792 | Boscalid                          | -3.139 | -3.139 |
| C24H45BiO6       | DB13910 | Valproate bismuth                 | -3.138 | -3.14  |
| C7H6BFO2         | DB09041 | Tavaborole                        | -3.132 | -3.132 |
| C27H34N4O        | DB12492 | Piritramide                       | -3.132 | -4.728 |
| C6H6O2           | DB09526 | Hydroquinone                      | -3.124 | -3.124 |
| C3H8O3           | DB09462 | Glycerin                          | -3.121 | -3.121 |
| C30H29ClN6O3     | DB11828 | Neratinib                         | -3.119 | -4.022 |
| C24H29NO5        | DB09292 | Sacubitril                        | -3.114 | -5.328 |
| C14H12O3         | DB14176 | Benzylparaben                     | -3.106 | -3.13  |
| C17H25NO2        | DB11096 | Meradimate                        | -3.104 | -3.104 |
| C18H40O4P2       | DB11180 | Tetrofosmin                       | -3.103 | -3.649 |
| C43H49N2O6S2     | DB09374 | Indocyanine green acid form       | -3.1   | -3.1   |
| C12H20N2S4       | DB14174 | Dipentamethylenethiuram disulfide | -3.096 | -3.096 |
| C17H27NO2        | DB11570 | Padimate O                        | -3.092 | -3.092 |
| C22H23ClN2O8     | DB09093 | Chlortetracycline                 | -3.091 | -3.227 |
| C19H23N4O6PS     | DB11748 | Benfotiamine                      | -3.09  | -5.415 |

|                  |         |                             |        |        |
|------------------|---------|-----------------------------|--------|--------|
| C65H90N14O19S2   | DB14554 | Dotatate                    | -3.09  | -4.863 |
| C16H24N2         | DB08944 | Isoaminile                  | -3.081 | -3.107 |
| C22H27CIFN7O4S   | DB11718 | Encorafenib                 | -3.076 | -3.51  |
| C25H48N6O10      | DB12615 | Plazomicin                  | -3.075 | -5.641 |
| C3H7CaO6P        | DB11264 | Calcium glycerophosphate    | -3.072 | -4.15  |
| C9H10O3          | DB13628 | Ethyl hydroxybenzoate       | -3.071 | -3.089 |
| C32H39NO2        | DB11742 | Ebastine                    | -3.07  | -3.078 |
| C9H16N2O2        | DB13221 | Apronalide                  | -3.068 | -3.068 |
| C24H29N3O8       | DB12035 | Sarecycline                 | -3.058 | -3.17  |
| C18H33NO3        | DB11272 | Methyl undecenoyl leucinate | -3.057 | -3.057 |
| C9H11CIN4O2      | DB09343 | Tipiracil                   | -3.056 | -3.864 |
| C9H5I2NO         | DB09115 | Diiodoxyhydroxyquinoline    | -3.055 | -3.334 |
| C8H9N3O4         | DB09220 | Nicorandil                  | -3.054 | -3.054 |
| C40H52F4N6O9S    | DB12026 | Voxilaprevir                | -3.053 | -3.056 |
| C4H4FeO4         | DB14489 | Ferrous succinate           | -3.042 | -3.042 |
| C21H24O2         | DB11619 | Gestrinone                  | -3.039 | -3.039 |
| C7H11N3O3        | DB12834 | Secnidazole                 | -3.038 | -3.038 |
| C65H87LuN14O19S2 | DB13985 | Lutetium Lu 177 dotatate    | -3.027 | -4.768 |
| C21H35NO         | DB09056 | Amorolfine                  | -3.026 | -3.833 |
| C27H26CIF3N6O3   | DB12095 | Telotristat ethyl           | -3.024 | -3.46  |
| C6H18O4Si3       | DB09512 | Simethicone                 | -3.02  | -3.02  |
| C14H23N3O10      | DB14007 | Pentetic acid               | -3.015 | -5.192 |
| C14H20InN3O10    | DB09425 | Indium In-111 pentetate     | -3.015 | -5.192 |
| C40H50N8O6       | DB09102 | Daclatasvir                 | -3.014 | -4.296 |
| C14H20Br2N2      | DB09019 | Bromhexine                  | -3.012 | -3.035 |
| C62H80InN12O19S2 | DB11835 | Indium In-111 pentetreotide | -3.012 | -4.854 |
| C21H18F3N3O5     | DB11799 | Bictegravir                 | -3.004 | -3.528 |
| C21H35NO         | DB09056 | Amorolfine                  | -3.002 | -3.178 |
| C57H65F5N10O8    | DB13878 | Pibrentasvir                | -3.002 | -4.626 |
| C10H12O3         | DB14177 | Propylparaben               | -2.995 | -3.012 |
| C17H26N4O3S2     | DB08966 | Fursultiamine               | -2.994 | -4.141 |
| C24H30CIN7O4S    | DB09075 | Edoxaban                    | -2.994 | -3.224 |
| C32H34N4O6       | DB11691 | Naldemedine                 | -2.993 | -4.88  |
| C6H6Br2N2        | DB14199 | Bromothalonil               | -2.989 | -2.989 |
| C17H15ClO4       | DB13873 | Fenofibric acid             | -2.988 | -2.988 |
| C14H9Cl2N3S2     | DB08933 | Luliconazole                | -2.987 | -2.987 |
| C22H19NO4        | DB09020 | Bisacodyl                   | -2.984 | -2.996 |
| C23H30N2O4       | DB09209 | Pholcodine                  | -2.977 | -4.577 |
| C13H9Cl3N2O      | DB11155 | Triclocarban                | -2.97  | -2.97  |
| C12H24N2O4S2     | DB11164 | Bicisate                    | -2.963 | -3.717 |
| C5H4ClNO2        | DB09257 | Gimeracil                   | -2.962 | -2.962 |
| C32H43N5O5       | DB11275 | Epicriptine                 | -2.96  | -4.698 |
| C16H18CIN3S      | DB09241 | Methylene blue              | -2.955 | -2.973 |
| C11H14CIN5       | DB14763 | Cycloguanil                 | -2.947 | -3.398 |
| C17H19NO         | DB12293 | Nefopam                     | -2.946 | -2.998 |
| C21H18F3N3O5     | DB11799 | Bictegravir                 | -2.939 | -3.293 |
| C10H30O5Si5      | DB11244 | Cyclomethicone 5            | -2.935 | -2.935 |
| C9H8N2           | DB12537 | Benzodiazepine              | -2.934 | -2.934 |
| C12H17NO3        | DB12911 | Nicoboxil                   | -2.931 | -2.931 |
| C18H26N2O5Tc     | DB09164 | Technetium Tc-99m disofenin | -2.924 | -4.466 |
| C18H12CrN3O6     | DB14529 | Chromium nicotinate         | -2.924 | -2.934 |
| C41H50N6O2       | DB11262 | Bisotrizole                 | -2.919 | -2.938 |
| C6H8N2           | DB14141 | p-Phenylenediamine          | -2.916 | -3.041 |
| C16H26N2O3       | DB09342 | Propoxycaine                | -2.906 | -2.927 |
| C12H18IN         | DB09480 | Iofetamine I-123            | -2.905 | -2.905 |
| C49H55N9O7       | DB11574 | Elbasvir                    | -2.901 | -4.293 |
| C13H15N3O4S      | DB14033 | Acetyl sulfisoxazole        | -2.901 | -2.901 |
| C17H26CINO       | DB11642 | Pitolisant                  | -2.9   | -2.901 |
| C20H33N3O3S      | DB09097 | Quinagolide                 | -2.881 | -4.902 |
| C29H39CIN7O2P    | DB12267 | Brigatinib                  | -2.876 | -5.124 |
| C49H54N8O8       | DB11613 | Velpatasvir                 | -2.874 | -4.371 |
| C11H17NO         | DB13624 | Methoxyphenamine            | -2.862 | -2.862 |
| C13H20N2O3S      | DB09009 | Articaine                   | -2.849 | -2.899 |

|                  |         |                                  |        |        |
|------------------|---------|----------------------------------|--------|--------|
| C10H14CaO6       | DB13800 | Calcium levulinate               | -2.849 | -2.851 |
| C27H33N2O6S2     | DB09136 | Isosulfan blue                   | -2.84  | -3.054 |
| C11H18N2O9       | DB12362 | Diaminopropanol tetraacetic acid | -2.84  | -5.087 |
| C24H25ClFN5O2    | DB11963 | Dacomitinib                      | -2.826 | -4.108 |
| C62H80InN12O19S2 | DB11835 | Indium In-111 pentetreotide      | -2.816 | -4.603 |
| CK2O3            | DB13977 | Potassium carbonate              | -2.815 | -3.858 |
| CNa2O3           | DB09460 | Sodium carbonate                 | -2.815 | -3.858 |
| CLi2O3           | DB14509 | Lithium carbonate                | -2.814 | -3.858 |
| CH24Al2Mg6O24    | DB13322 | Hydrotalcite                     | -2.814 | -3.858 |
| CHKO3            | DB11098 | Potassium bicarbonate            | -2.814 | -3.858 |
| CMgO3            | DB09481 | Magnesium carbonate              | -2.814 | -3.858 |
| C4H7NaO3         | DB09072 | Sodium oxybate                   | -2.811 | -2.813 |
| C31H35F6N4O5P    | DB14019 | Fosnetupitant                    | -2.806 | -4.787 |
| C26H32N2O8       | DB13711 | Tritoqualine                     | -2.796 | -2.962 |
| C27H31FN4O8      | DB12329 | Eravacycline                     | -2.795 | -2.929 |
| C15H23N3OS       | DB13858 | Dimazole                         | -2.794 | -4.807 |
| C25H24N6O2       | DB09053 | Ibrutinib                        | -2.787 | -2.787 |
| C24H29N7O2       | DB09073 | Palbociclib                      | -2.783 | -3.189 |
| C18H37N5O8       | DB13270 | Dibekacin                        | -2.779 | -4.531 |
| C10H18O          | DB14183 | Geraniol                         | -2.777 | -2.777 |
| C17H15NO5        | DB13657 | Benorilate                       | -2.776 | -2.776 |
| C10H7Cl2NO       | DB13306 | Chlorquinaldol                   | -2.775 | -2.957 |
| C28H34O8S2       | DB09534 | Ecamsule                         | -2.767 | -2.767 |
| C11H17NO         | DB11278 | DL-Methylephedrine               | -2.757 | -2.849 |
| C13H16ClNO       | DB11823 | Esketamine                       | -2.752 | -3.834 |
| C22H18FN7O       | DB09054 | Idelalisib                       | -2.747 | -4.744 |
| C35H38N4O6       | DB09238 | Manidipine                       | -2.742 | -2.883 |
| C33H54O5         | DB14001 | alpha-Tocopherol succinate       | -2.739 | -2.739 |
| C20H22O3         | DB09495 | Avobenzon                        | -2.729 | -3.993 |
| C12H8N2O4Zn      | DB11175 | Zinc picolinate                  | -2.727 | -2.737 |
| O7P2Tc           | DB09165 | Technetium Tc-99m pyrophosphate  | -2.727 | -3.428 |
| C8H17FeN3O6S2    | DB11197 | Ferrous cysteine glycinate       | -2.719 | -2.733 |
| C4H7Cl3O         | DB11386 | Chlorobutanol                    | -2.717 | -2.717 |
| C2H6O3S2         | DB09110 | Coenzyme M                       | -2.715 | -2.717 |
| C18H26N2O5Tc     | DB09164 | Technetium Tc-99m disofenin      | -2.714 | -2.76  |
| C21H24N2         | DB13246 | Quinupramine                     | -2.712 | -2.712 |
| C2H7N5           | DB13100 | Biguanide                        | -2.709 | -2.713 |
| C20H25N3S        | DB12710 | Perazine                         | -2.707 | -3.316 |
| C8H8O3           | DB14212 | Methylparaben                    | -2.702 | -2.726 |
| C12H9NO2         | DB12300 | P-nitrobiphenyl                  | -2.69  | -2.69  |
| C12H19NO4        | DB14006 | Choline salicylate               | -2.681 | -2.681 |
| C5H14NO          | DB09563 | Choline C-11                     | -2.681 | -2.681 |
| C5H14ClNO        | DB09277 | Choline C 11                     | -2.681 | -2.681 |
| C31H38O7         | DB11260 | Diacetyl benzoyl lathyrol        | -2.677 | -2.677 |
| C4H4ClNOS        | DB14197 | Methylchloroisothiazolinone      | -2.675 | -2.675 |
| C21H45N3         | DB08958 | Hexetidine                       | -2.659 | -3.092 |
| C11H14N2S        | DB11156 | Pyrantel                         | -2.656 | -2.656 |
| C15H19BrN2O5Tc   | DB09137 | Technetium Tc-99m mebprofenin    | -2.654 | -4.196 |
| C22H40NO         | DB11594 | Domiphen                         | -2.654 | -2.654 |
| C10H15N          | DB09571 | Levmetamfetamine                 | -2.652 | -2.652 |
| C10H16O          | DB14156 | Synthetic camphor                | -2.642 | -2.642 |
| C10H10N2O        | DB12243 | Edaravone                        | -2.635 | -2.987 |
| C18H30O2         | DB13854 | Gamolenic acid                   | -2.627 | -2.631 |
| C15H18N2         | DB14195 | 4-(Isopropylamino)diphenylamine  | -2.617 | -3.208 |
| C19H27NO3        | DB12161 | Deutetrabenazine                 | -2.614 | -4.109 |
| C14H12O4         | DB11221 | Dioxybenzone                     | -2.613 | -4.511 |
| C9H14N4O4        | DB09282 | Molsidomine                      | -2.613 | -2.613 |
| C32H43N5O5       | DB11274 | Dihydro-alpha-ergocryptine       | -2.608 | -5.036 |
| C17H27NO3        | DB09345 | Pramocaine                       | -2.605 | -3.026 |
| C14H21NO2        | DB09088 | Amylocaine                       | -2.601 | -2.613 |
| C9H12ClN5O       | DB09242 | Moxonidine                       | -2.6   | -2.667 |
| C18H21N3O        | DB13225 | Dibenzepin                       | -2.596 | -4.807 |
| C38H46F4N6O9S    | DB13879 | Glecaprevir                      | -2.595 | -2.598 |



|                |         |                                             |        |        |
|----------------|---------|---------------------------------------------|--------|--------|
| C24H38N2O4     | DB11915 | Valbenazine                                 | -2.59  | -5.027 |
| C32H35N5O5     | DB09272 | Eluxadolone                                 | -2.588 | -3.861 |
| S8Tc           | DB09397 | Technetium Tc-99m sulfur colloid            | -2.582 | -2.582 |
| S8             | DB09353 | Octasulfur                                  | -2.582 | -2.582 |
| C14H12O6S      | DB11185 | Sulisobenzone                               | -2.579 | -4.204 |
| C4H2FeO4       | DB14491 | Ferrous fumarate                            | -2.577 | -2.577 |
| AlO4P          | DB14517 | Aluminium phosphate                         | -2.564 | -2.604 |
| HNa2O4P        | DB14502 | Sodium phosphate, dibasic                   | -2.564 | -2.604 |
| CaH5O6P        | DB14481 | Calcium phosphate dihydrate                 | -2.564 | -2.604 |
| Ca3O8P2        | DB11348 | Calcium Phosphate                           | -2.564 | -2.604 |
| H2NaO4P        | DB09449 | Sodium phosphate, monobasic                 | -2.564 | -2.604 |
| HK2O4P         | DB09414 | Dipotassium phosphate                       | -2.564 | -2.604 |
| H2KO4P         | DB09413 | Monopotassium phosphate                     | -2.564 | -2.604 |
| H3O4P          | DB09394 | Phosphoric acid                             | -2.564 | -2.604 |
| C27H26ClF3N6O3 | DB12095 | Telotristat ethyl                           | -2.563 | -4.835 |
| C16H19NO2      | DB13219 | Medifoxamine                                | -2.561 | -3.028 |
| C9H15NO2       | DB13262 | Aceclidine                                  | -2.553 | -2.555 |
| C11H17NO       | DB11278 | DL-Methylephedrine                          | -2.551 | -3.699 |
| C34H53NO11     | DB09049 | Naloxegol                                   | -2.546 | -5.093 |
| C10H8BrNO      | DB13222 | Tilbroquinol                                | -2.54  | -3.265 |
| C7H6O3         | DB11268 | Protocatechualdehyde                        | -2.535 | -3.601 |
| C22H24FN3O2    | DB12867 | Benperidol                                  | -2.516 | -2.533 |
| C9H8O          | DB14184 | Cinnamaldehyde                              | -2.513 | -2.513 |
| C14H12O4       | DB11221 | Dioxybenzone                                | -2.509 | -4.215 |
| C30H26N2O13    | DB11184 | Oftasceine                                  | -2.508 | -3.781 |
| C20H17F3N2O4   | DB08976 | Floctafenine                                | -2.504 | -4.714 |
| C30H34N4O2     | DB11363 | Alectinib                                   | -2.503 | -2.656 |
| C21H22N6O      | DB11978 | Glasdegib                                   | -2.5   | -2.939 |
| C23H22CIN5O3   | DB12364 | Betrixaban                                  | -2.487 | -2.488 |
| C49H54F2N8O6   | DB09027 | Ledipasvir                                  | -2.482 | -3.632 |
| C5H11NO2S      | DB13972 | Racemethionine                              | -2.465 | -2.465 |
| C13H10N2O3S    | DB11115 | Ensulizole                                  | -2.459 | -3.736 |
| C3H4O2         | DB09348 | Propiolactone                               | -2.452 | -2.452 |
| C6H12N2S4      | DB13245 | Thiram                                      | -2.449 | -2.449 |
| C5H8FN02       | DB13146 | Fluciclovine (18F)                          | -2.448 | -2.448 |
| C29H44N8O3     | DB12141 | Gilteritinib                                | -2.444 | -5.136 |
| C45H50CIN7O7S  | DB11581 | Venetoclax                                  | -2.429 | -2.44  |
| C14H9Cl3N2OS   | DB12245 | Triclabendazole                             | -2.426 | -3.223 |
| C40H80NO8P     | DB09114 | Colfosceril palmitate                       | -2.417 | -2.417 |
| C20H24N        | DB13720 | Diphemanil                                  | -2.417 | -2.417 |
| B4Na2O7        | DB14505 | Sodium borate                               | -2.407 | -2.407 |
| C3H3F5         | DB13117 | Pentafluoropropane                          | -2.405 | -2.405 |
| C13H20N2O3S    | DB09009 | Articaine                                   | -2.397 | -3.892 |
| C18H21CIN2     | DB08936 | Chlorcyclizine                              | -2.396 | -2.864 |
| O2Si           | DB11132 | Silicon dioxide                             | -2.391 | -2.391 |
| C32H48O4       | DB13955 | Estradiol dianthate                         | -2.384 | -2.384 |
| C9H19NO4       | DB09357 | Dexpanthenol                                | -2.381 | -2.381 |
| C49H54F2N8O6   | DB09027 | Ledipasvir                                  | -2.375 | -4.619 |
| C40H50N8O6     | DB09102 | Daclatasvir                                 | -2.372 | -3.494 |
| C22H24FN3O2    | DB12867 | Benperidol                                  | -2.37  | -4.506 |
| C30H34N4O2     | DB11363 | Alectinib                                   | -2.369 | -3.249 |
| C23H30N2O4     | DB09209 | Pholcodine                                  | -2.368 | -3.841 |
| FNa2O3P        | DB09484 | Sodium fluorophosphate                      | -2.368 | -2.386 |
| C20H22O3       | DB09495 | Avobenzon                                   | -2.363 | -3.58  |
| C18H22N2       | DB14196 | N-Cyclohexyl-N'-phenyl-1,4-phenylenediamine | -2.358 | -3.104 |
| C40H50N8O6     | DB09102 | Daclatasvir                                 | -2.356 | -3.196 |
| Al2ClH7O6      | DB11573 | Aluminum chlorohydrate                      | -2.342 | -2.342 |
| H8O4Tc         | DB09314 | Technetium Tc-99m pertechnetate             | -2.342 | -2.342 |
| H2O            | DB09145 | Water                                       | -2.342 | -2.342 |
| C49H54F2N8O6   | DB09027 | Ledipasvir                                  | -2.325 | -3.581 |
| C32H43N5O5     | DB11275 | Epicriptine                                 | -2.316 | -4.737 |
| C12H13I3N2O2   | DB09333 | Iopodic acid                                | -2.311 | -3.524 |
| C24H25ClFN5O2  | DB11963 | Dacomitinib                                 | -2.311 | -4.06  |

|                  |         |                                                |        |        |
|------------------|---------|------------------------------------------------|--------|--------|
| C65H87LuN14O19S2 | DB13985 | Lutetium Lu 177 dotatate                       | -2.31  | -4.074 |
| C7H7NO2          | DB13882 | Methyl nicotinate                              | -2.303 | -2.303 |
| C4H6N4O3         | DB11100 | Allantoin                                      | -2.301 | -3.957 |
| C20H19F2N3O5     | DB08930 | Dolutegravir                                   | -2.279 | -4.247 |
| C4H10O2          | DB14110 | Butylene glycol                                | -2.279 | -2.279 |
| C7H16N4O4S2      | DB12473 | Taurolidine                                    | -2.278 | -2.853 |
| C22H23ClN2O8     | DB09093 | Chlortetracycline                              | -2.27  | -3.518 |
| C19H18FN3O       | DB12332 | Rucaparib                                      | -2.264 | -4.449 |
| C49H54N8O8       | DB11613 | Velpatasvir                                    | -2.26  | -3.411 |
| C18H23NO3        | DB08941 | Isoxsuprine                                    | -2.26  | -3.953 |
| C35H43N5O4       | DB11855 | Revefenacin                                    | -2.259 | -4.097 |
| K2O4S            | DB14499 | Potassium sulfate                              | -2.256 | -2.256 |
| NiO4S            | DB14180 | Nickel sulfate                                 | -2.256 | -2.256 |
| FeO4S            | DB13257 | Ferrous sulfate anhydrous                      | -2.256 | -2.256 |
| CrO4S            | DB14530 | Chromous sulfate                               | -2.256 | -2.256 |
| Fe2H10O17S3      | DB11171 | Ferric sulfate                                 | -2.256 | -2.256 |
| BaO4S            | DB11150 | Barium sulfate                                 | -2.256 | -2.256 |
| Al2O12S3         | DB11239 | Aluminum sulfate                               | -2.256 | -2.256 |
| Na2O4S           | DB09472 | Sodium sulfate                                 | -2.256 | -2.256 |
| O4SZn            | DB09322 | Zinc sulfate                                   | -2.256 | -2.256 |
| Al5H33Mg10O40S2  | DB08938 | Magaldrate                                     | -2.256 | -2.256 |
| AlKO8S2          | DB09087 | Potassium alum                                 | -2.256 | -2.256 |
| C24H44BCuF4N4O4  | DB14106 | Tetrakis(2-methoxyisobutylisocyanide)copper(I) | -2.252 | -2.252 |
| C36H66N6O6Tc     | DB09161 | Technetium Tc-99m sestamibi                    | -2.252 | -2.252 |
| C25H27N3O2S      | DB09128 | Brexpiprazole                                  | -2.252 | -3.193 |
| Al2H2MgO9Si2     | DB13595 | Almasilate                                     | -2.247 | -2.247 |
| C44H88NO8P       | DB14099 | 1,2-Distearoyllecithin                         | -2.245 | -2.245 |
| C35H38N4O6       | DB09238 | Manidipine                                     | -2.242 | -3.522 |
| CH6N2O3          | DB11129 | Carbamide peroxide                             | -2.23  | -2.23  |
| CH4N2O           | DB09513 | Urea C-14                                      | -2.23  | -2.23  |
| CH4N2O           | DB09510 | Urea C-13                                      | -2.23  | -2.23  |
| C30H44N2O10      | DB13265 | Hexobendine                                    | -2.229 | -4.521 |
| C7H7BrN4O2       | DB14018 | Bromotheophylline                              | -2.228 | -4.005 |
| C11H14ClN5       | DB14763 | Cycloguanil                                    | -2.223 | -4.249 |
| C18H22F2N4O      | DB09040 | Efinaconazole                                  | -2.222 | -3.999 |
| C21H38N          | DB11073 | Cetylpyridinium                                | -2.222 | -2.222 |
| H32Mo7N6O28      | DB11128 | Ammonium molybdate                             | -2.222 | -2.224 |
| H3N              | DB09326 | Ammonia N-13                                   | -2.222 | -2.224 |
| C29H35F3N2O3     | DB12371 | Siponimod                                      | -2.214 | -2.222 |
| C21H26F3N5       | DB09195 | Lorpiprazole                                   | -2.201 | -2.315 |
| C65H87LuN14O19S2 | DB13985 | Lutetium Lu 177 dotatate                       | -2.193 | -3.591 |
| C49H55N9O7       | DB11574 | Elbasvir                                       | -2.187 | -3.477 |
| C27H34N4O        | DB12492 | Piritramide                                    | -2.187 | -2.281 |
| C16H25NO3        | DB09205 | Moxisylyte                                     | -2.182 | -4.195 |
| C11H18N2O9       | DB12362 | Diaminopropanol tetraacetic acid               | -2.169 | -4.359 |
| C6H12O3          | DB09117 | Paraldehyde                                    | -2.162 | -2.162 |
| C9H12ClN5O       | DB09242 | Moxonidine                                     | -2.162 | -3.484 |
| C40H50N8O6       | DB09102 | Daclatasvir                                    | -2.16  | -3.025 |
| C18H32O2         | DB14104 | Linoleic acid                                  | -2.16  | -2.163 |
| C13H13N3         | DB14191 | Diphenylguanidine                              | -2.157 | -2.157 |
| C16H19NO2        | DB13219 | Medifoxamine                                   | -2.153 | -2.512 |
| C7H5NS2          | DB11496 | 2-mercaptobenzothiazole                        | -2.151 | -2.151 |
| C21H26N2O5       | DB09080 | Olodaterol                                     | -2.146 | -4.77  |
| C15H10Cl2N4O6    | DB11632 | Opicapone                                      | -2.145 | -4.387 |
| C8H8O3           | DB09543 | Methyl salicylate                              | -2.136 | -3.309 |
| C2HCl3           | DB13323 | Trichloroethylene                              | -2.136 | -2.136 |
| C28H37N3O3       | DB11591 | Bilastine                                      | -2.131 | -3.88  |
| C12H13FN4O5      | DB09327 | Tegafur-uracil                                 | -2.128 | -3.926 |
| C8H9FN2O3        | DB09256 | Tegafur                                        | -2.128 | -3.926 |
| C10H10N2O        | DB12243 | Edaravone                                      | -2.123 | -3.431 |
| C6H9AlO6         | DB14518 | Aluminum acetate                               | -2.113 | -2.116 |
| C2H3KO2          | DB14498 | Potassium acetate                              | -2.113 | -2.116 |
| C4H6O4Zn         | DB14487 | Zinc acetate                                   | -2.113 | -2.116 |

|                 |         |                                    |        |        |
|-----------------|---------|------------------------------------|--------|--------|
| C4H6MgO4        | DB13996 | Magnesium acetate                  | -2.113 | -2.116 |
| C4H14MgO8       | DB09409 | Magnesium acetate tetrahydrate     | -2.113 | -2.116 |
| C2H3NaO2        | DB09395 | Sodium acetate                     | -2.113 | -2.116 |
| C49H54N8O8      | DB11613 | Velpatasvir                        | -2.108 | -4.197 |
| C7H16N4O2       | DB11815 | Tilarginine                        | -2.108 | -2.108 |
| C35H46CIN5O9S   | DB11586 | Asunaprevir                        | -2.105 | -4.823 |
| C20H26O3        | DB13952 | Estradiol acetate                  | -2.096 | -2.096 |
| C22H17CIN6O     | DB11952 | Duvelisib                          | -2.095 | -4.092 |
| C26H26CIN3      | DB11614 | Rupatadine                         | -2.09  | -3.253 |
| C35H43N5O4      | DB11855 | Revefenacin                        | -2.089 | -3.697 |
| C6H12N2S3       | DB14178 | Tetramethylthiuram monosulfide     | -2.065 | -2.065 |
| C29H33FN2O4     | DB09030 | Vorapaxar                          | -2.064 | -4.421 |
| C23H28N8O4      | DB12483 | Copanlisib                         | -2.046 | -4.769 |
| C7H16N4O4S2     | DB12473 | Taurolidine                        | -2.044 | -2.613 |
| C6H8N2          | DB14141 | p-Phenylenediamine                 | -2.042 | -3.027 |
| C9H17Cl2N4      | DB14198 | Quaternium-15                      | -2.039 | -2.039 |
| O7P2Te          | DB09165 | Technetium Tc-99m pyrophosphate    | -2.038 | -4.375 |
| C20H31NO3       | DB11186 | Pentoxifyverine                    | -2.035 | -4.678 |
| C35H41N5O5      | DB13345 | Dihydroergocristine                | -2.011 | -3.753 |
| C41H50N6O2      | DB11262 | Bisotrizole                        | -2.006 | -4.057 |
| C10H16N2O       | DB11738 | Rilmenidine                        | -1.954 | -1.955 |
| C32H43N5O5      | DB11274 | Dihydro-alpha-ergocryptine         | -1.943 | -3.681 |
| AuH4Na3O8S4     | DB13743 | Sodium aurotiosulfate              | -1.912 | -2.018 |
| C37H34N2Na2O9S3 | DB11183 | Light green SF yellowish           | -1.909 | -1.911 |
| C8H10N6         | DB12945 | Dihydralazine                      | -1.894 | -2.351 |
| CCaN2           | DB09116 | Calcium carbimide                  | -1.888 | -1.888 |
| C18H24N2O5      | DB09477 | Enalaprilat                        | -1.886 | -2.012 |
| C4H9Al2CIN4O7   | DB11205 | Alcloxa                            | -1.884 | -3.535 |
| C10H12CaN2Na2O8 | DB14598 | Edetate calcium disodium anhydrous | -1.873 | -4.088 |
| C3H8N2OS        | DB13838 | Noxytiolin                         | -1.87  | -1.87  |
| C19H19NS        | DB13292 | Pimethixene                        | -1.867 | -1.877 |
| ClKO4           | DB09418 | Potassium perchlorate              | -1.866 | -1.866 |
| C25H28O3        | DB13953 | Estradiol benzoate                 | -1.862 | -1.862 |
| C45H50CIN7O7S   | DB11581 | Venetoclax                         | -1.853 | -4.211 |
| C21H26N2O5      | DB09080 | Olodaterol                         | -1.848 | -1.855 |
| C24H31N3OS      | DB13213 | Butaperazine                       | -1.843 | -4.187 |
| C21H30O4S       | DB09091 | Tixocortol                         | -1.809 | -4.305 |
| C2H8N2          | DB14189 | Ethylenediamine                    | -1.803 | -2.503 |
| C2H8N2          | DB14189 | Ethylenediamine                    | -1.803 | -2.02  |
| CHI3            | DB13813 | Iodoform                           | -1.797 | -1.797 |
| C24H29N7O2      | DB09073 | Palbociclib                        | -1.796 | -3.708 |
| C16H24N2        | DB08944 | Isoaminile                         | -1.796 | -3.65  |
| C17H28N2O       | DB08987 | Etidocaine                         | -1.789 | -3.962 |
| C18H22N2S       | DB09068 | Vortioxetine                       | -1.773 | -4.453 |
| C6H15NO3        | DB13747 | Trolamine                          | -1.762 | -1.832 |
| C13H21NO6       | DB11079 | Trolamine salicylate               | -1.754 | -1.825 |
| Mg2O8Si3        | DB09281 | Magnesium trisilicate              | -1.753 | -1.753 |
| C21H38N         | DB13282 | Benzododecinium                    | -1.735 | -1.735 |
| C20H19F2N3O5    | DB08930 | Dolutegravir                       | -1.714 | -2.001 |
| C34H28N6O14S4   | DB09158 | Trypan blue free acid              | -1.704 | -3.555 |
| C10H9N5O        | DB11336 | Kinetin                            | -1.695 | -3.692 |
| C16H28N2O2      | DB13288 | Tromantadine                       | -1.684 | -3.927 |
| CHCl3           | DB11387 | Chloroform                         | -1.676 | -1.676 |
| C7H16N4O4S2     | DB12473 | Taurolidine                        | -1.674 | -2.524 |
| C49H55N9O7      | DB11574 | Elbasvir                           | -1.652 | -2.905 |
| C17H21NO        | DB11160 | Phenyltoloxamine                   | -1.64  | -3.653 |
| C10H10N2O       | DB12243 | Edaravone                          | -1.639 | -2.432 |
| C45H54F2N4O8    | DB11641 | Vinflunine                         | -1.638 | -1.843 |
| C57H65F5N10O8   | DB13878 | Pibrentasvir                       | -1.634 | -3.068 |
| C17H19NO        | DB12293 | Nefopam                            | -1.633 | -3.099 |
| C10H15NO2       | DB11610 | Oxilofrine                         | -1.629 | -3.974 |
| C12H19NO        | DB11587 | Etafedrine                         | -1.609 | -3.094 |
| C27H31FN4O8     | DB12329 | Eravacycline                       | -1.606 | -4.139 |

|                |         |                                          |        |        |
|----------------|---------|------------------------------------------|--------|--------|
| C14H11FN2OS    | DB09151 | Flutemetamol (18F)                       | -1.603 | -3.824 |
| Bi5H9N4O22     | DB13209 | Bismuth subnitrate                       | -1.603 | -1.603 |
| CrN3O9         | DB14527 | Chromic nitrate                          | -1.603 | -1.603 |
| KNO3           | DB11090 | Potassium nitrate                        | -1.603 | -1.603 |
| C14H20InN3O10  | DB09425 | Indium In-111 pentetate                  | -1.595 | -2.411 |
| C49H54N8O8     | DB11613 | Velpatasvir                              | -1.58  | -3.839 |
| C49H54N8O8     | DB11613 | Velpatasvir                              | -1.574 | -2.782 |
| CO2            | DB09157 | Carbon dioxide                           | -1.568 | -1.568 |
| C17H34O2       | DB13966 | Isopropyl myristate                      | -1.562 | -1.562 |
| C27H34N4O      | DB12492 | Piritramide                              | -1.557 | -3.766 |
| C10H10N2O      | DB12243 | Edaravone                                | -1.555 | -3.088 |
| C16H34O        | DB09494 | Cetyl alcohol                            | -1.533 | -1.533 |
| C63H87N13O19S2 | DB12602 | Pentetreotide                            | -1.518 | -1.584 |
| C36H51Cl2N3O4  | DB14185 | Aripiprazole lauroxil                    | -1.493 | -2.251 |
| C27H33N2O6S2   | DB09136 | Isosulfan blue                           | -1.486 | -2.192 |
| C13H10O3       | DB11071 | Phenyl salicylate                        | -1.485 | -1.51  |
| C38H80N        | DB14143 | Distearyltrimonium                       | -1.441 | -1.441 |
| C11H20O2       | DB11117 | Undecylenic acid                         | -1.413 | -1.416 |
| C49H54F2N8O6   | DB09027 | Ledipasvir                               | -1.397 | -2.577 |
| ClO            | DB11123 | Hypochlorite                             | -1.377 | -1.377 |
| C11H14O3       | DB14084 | Butylparaben                             | -1.375 | -3.458 |
| C26H27N3O5S    | DB09183 | Dasabuvir                                | -1.366 | -3.785 |
| C31H33N5O4     | DB09079 | Nintedanib                               | -1.365 | -2.189 |
| C2H5Cl         | DB13259 | Ethyl chloride                           | -1.365 | -1.365 |
| C13H19NO3      | DB09185 | Viloxazine                               | -1.365 | -3.298 |
| C4H10FeN2O8S   | DB14501 | Ferrous glycine sulfate                  | -1.363 | -1.363 |
| C4H8FeN2O4     | DB11210 | Ferrous bisglycinate                     | -1.363 | -1.363 |
| C2H8AlClNO4Zr  | DB11200 | Aluminum zirconium octachlorohydrate gly | -1.363 | -1.363 |
| C4H8MgN2O4     | DB11189 | Magnesium glycinate                      | -1.363 | -1.363 |
| C14H21NO2      | DB09088 | Amylocaine                               | -1.346 | -3.683 |
| C15H24N2O2     | DB09085 | Tetracaine                               | -1.342 | -3.76  |
| C9H10O3        | DB13628 | Ethyl hydroxybenzoate                    | -1.336 | -3.401 |
| CK2O3          | DB13977 | Potassium carbonate                      | -1.33  | -1.442 |
| CNa2O3         | DB09460 | Sodium carbonate                         | -1.33  | -1.442 |
| CLi2O3         | DB14509 | Lithium carbonate                        | -1.33  | -1.442 |
| CH24Al2Mg6O24  | DB13322 | Hydrotalcite                             | -1.33  | -1.442 |
| CHKO3          | DB11098 | Potassium bicarbonate                    | -1.33  | -1.442 |
| CMgO3          | DB09481 | Magnesium carbonate                      | -1.33  | -1.442 |
| O2             | DB09140 | Oxygen                                   | -1.31  | -1.31  |
| C27H31FN4O8    | DB12329 | Eravacycline                             | -1.308 | -3.45  |
| C20H19F2N3O5   | DB08930 | Dolutegravir                             | -1.306 | -1.932 |
| C10H14N2Na2O8  | DB14600 | Edetate disodium anhydrous               | -1.29  | -3.505 |
| C27H26ClF3N6O3 | DB12095 | Telotristat ethyl                        | -1.29  | -3.559 |
| C21H26F3N5     | DB09195 | Loripiprazole                            | -1.279 | -2.32  |
| C35H38N4O6     | DB09238 | Manidipine                               | -1.273 | -2.666 |
| C16H26N2O3     | DB09342 | Propoxycaine                             | -1.268 | -3.254 |
| C10H14N2O2     | DB14754 | Solriamfetol                             | -1.261 | -3.347 |
| C8H8O3         | DB14212 | Methylparaben                            | -1.261 | -3.184 |
| C20H33N3O3S    | DB09097 | Quinagolide                              | -1.245 | -3.322 |
| C49H54N8O8     | DB11613 | Velpatasvir                              | -1.212 | -2.388 |
| C17H12I2O3     | DB13277 | Benziodarone                             | -1.198 | -3.74  |
| H4OSi          | DB11343 | Silanol                                  | -1.192 | -1.192 |
| C57H65F5N10O8  | DB13878 | Pibrentasvir                             | -1.125 | -1.888 |
| C27H34N4O      | DB12492 | Piritramide                              | -1.114 | -2.826 |
| C20H25N3S      | DB12710 | Perazine                                 | -1.112 | -3.456 |
| C49H55N9O7     | DB11574 | Elbasvir                                 | -1.11  | -2.39  |
| C9H7NO         | DB11145 | Oxyquinoline                             | -1.093 | -3.172 |
| C27H18InN3O3   | DB09473 | Indium In-111 oxyquinoline               | -1.093 | -3.172 |
| C14H23N3O10    | DB14007 | Pentetic acid                            | -1.068 | -1.884 |
| C36H72N8O8P    | DB11283 | DL-dimyrystoylphosphatidylcholine        | -1.065 | -1.065 |
| C19H25N3O2S2   | DB08967 | Dimetotiazine                            | -1.047 | -1.048 |
| C27H32F2N8     | DB12001 | Abemaciclib                              | -1.041 | -3.693 |
| C18H18ClN3S    | DB13256 | Clothiapine                              | -1.035 | -2.766 |

|                  |         |                                               |        |        |
|------------------|---------|-----------------------------------------------|--------|--------|
| C14H19N3O        | DB13216 | Oxolamine                                     | -1.034 | -3.131 |
| C40H50N8O6       | DB09102 | Daclatasvir                                   | -1.023 | -2.276 |
| C28H37N3O3       | DB11591 | Bilastine                                     | -1.022 | -3.487 |
| C30H32F6N4O      | DB09048 | Netupitant                                    | -1.003 | -2.895 |
| C16H25GdN4O8     | DB09132 | Gadoteric acid                                | -1.002 | -1.067 |
| C14H20Br2N2      | DB09019 | Bromhexine                                    | -0.985 | -2.932 |
| C41H67NO15       | DB13179 | Troleandomycin                                | -0.983 | -1.137 |
| C40H43N7O7S      | DB09297 | Paritaprevir                                  | -0.978 | -0.985 |
| C26H23N7O2       | DB11703 | Acalabrutinib                                 | -0.968 | -3.191 |
| C17H13N3O5S2     | DB13248 | Phthalylsulfathiazole                         | -0.965 | -1.518 |
| C18H15NO8S2      | DB09268 | Picosulfuric acid                             | -0.957 | -3.298 |
| C20H41N5O7       | DB13274 | Micronomicin                                  | -0.956 | -2.69  |
| C12H24N2O4S2     | DB11164 | Bicisate                                      | -0.955 | -2.698 |
| CO               | DB11588 | Carbon monoxide                               | -0.949 | -0.949 |
| NO2              | DB12529 | Nitrite                                       | -0.948 | -0.948 |
| C8H17FeN3O6S2    | DB11197 | Ferrous cysteine glycinate                    | -0.888 | -3.107 |
| C49H55N9O7       | DB11574 | Elbasvir                                      | -0.888 | -2.131 |
| C25H25F3N4O6     | DB11637 | Delamanid                                     | -0.884 | -3.252 |
| F6S              | DB11104 | Sulfur hexafluoride                           | -0.849 | -0.849 |
| C25H30N6O2       | DB12147 | Erdafitinib                                   | -0.844 | -0.844 |
| C32H39NO2        | DB11742 | Ebastine                                      | -0.806 | -3.311 |
| C4F10            | DB12821 | Perflubutane                                  | -0.801 | -0.801 |
| C41H67NO15       | DB13179 | Troleandomycin                                | -0.727 | -1.604 |
| C31H33N5O4       | DB09079 | Nintedanib                                    | -0.712 | -3.222 |
| N2               | DB09152 | Nitrogen                                      | -0.709 | -0.709 |
| C32H34N4O6       | DB11691 | Naldemedine                                   | -0.675 | -3.084 |
| C24H31NO4        | DB11269 | Diethylamino hydroxybenzoyl hexyl benzoate    | -0.662 | -2.951 |
| C49H55N9O7       | DB11574 | Elbasvir                                      | -0.658 | -1.802 |
| C21H23BrFNO2     | DB12401 | Bromperidol                                   | -0.653 | -2.905 |
| C50H71N13O12     | DB11842 | Angiotensin II                                | -0.647 | -1.325 |
| C19H18N6O6S2     | DB14725 | Cefamandole nafate                            | -0.631 | -0.631 |
| C29H40N4O7       | DB12455 | Omadacycline                                  | -0.629 | -3.009 |
| C40H43N7O7S      | DB09297 | Paritaprevir                                  | -0.626 | -3.341 |
| FH               | DB11072 | Hydrogen fluoride                             | -0.616 | -0.616 |
| C27H32F2N8       | DB12001 | Abemaciclib                                   | -0.583 | -2.736 |
| C15H16O9         | DB13155 | Esculin                                       | -0.557 | -2.906 |
| C40H52N2O4       | DB13947 | Testosterone enantate benzilic acid hydrazone | -0.538 | -0.538 |
| C32H34N4O6       | DB11691 | Naldemedine                                   | -0.535 | -3.16  |
| C18H21ClN2       | DB08936 | Chlorcyclizine                                | -0.535 | -2.566 |
| HNO2             | DB09112 | Nitrous acid                                  | -0.469 | -0.469 |
| C65H87GaN14O19S2 | DB13925 | Dotatate gallium Ga-68                        | -0.422 | -1.633 |
| C22H23ClN2O8     | DB09093 | Chlortetracycline                             | -0.401 | -2.105 |
| C14H23N3O10      | DB14007 | Pentetic acid                                 | -0.385 | -2.224 |
| C2H2F4           | DB13116 | Norflurane                                    | -0.378 | -0.378 |
| C29H35F3N2O3     | DB12371 | Siponimod                                     | -0.367 | -2.969 |
| C36H84O10P4Tc    | DB09160 | Technetium Tc-99m tetrofosmin                 | -0.351 | -1.211 |
| C18H40N          | DB13970 | Diocetyltrimonium                             | -0.332 | -0.332 |
| C19H19NS         | DB13292 | Pimethixene                                   | -0.33  | -2.805 |
| FN2O3P           | DB09484 | Sodium fluorophosphate                        | -0.319 | -2.418 |
| H2O2             | DB11091 | Hydrogen peroxide                             | -0.313 | -0.313 |
| AuH4Na3O8S4      | DB13743 | Sodium aurotiolate                            | -0.308 | -1.382 |
| C18H12CrN3O6     | DB14529 | Chromium nicotinate                           | -0.216 | -2.664 |
| C30H29ClN6O3     | DB11828 | Neratinib                                     | -0.203 | -2.017 |
| C31H41N5O5       | DB11273 | Dihydroergocornine                            | -0.2   | -2.633 |
| C23H29NO3        | DB12278 | Propiverine                                   | -0.196 | -2.78  |
| C34H28N6O14S4    | DB09158 | Trypan blue free acid                         | -0.191 | -0.246 |
| C18H40O4P2       | DB11180 | Tetrofosmin                                   | -0.17  | -1.029 |
| C27H33N2         | DB11279 | Brilliant green cation                        | -0.133 | -0.84  |
| C26H26N2O6S      | DB09319 | Carindacillin                                 | -0.128 | -0.763 |
| C45H54F2N4O8     | DB11641 | Vinflunine                                    | -0.113 | -1.172 |
| C12H8N2O4Zn      | DB11175 | Zinc picolinate                               | -0.108 | -2.556 |
| C16H25GdN4O8     | DB09132 | Gadoteric acid                                | -0.062 | -1.464 |
| C49H54F2N8O6     | DB09027 | Ledipasvir                                    | -0.05  | -1.407 |

|                  |         |                                             |        |        |
|------------------|---------|---------------------------------------------|--------|--------|
| C14H20InN3O10    | DB09425 | Indium In-111 pentetate                     | -0.028 | -1.867 |
| C29H44N8O3       | DB12141 | Gilteritinib                                | 0.021  | -2.659 |
| C65H87GaN14O19S2 | DB13925 | Dotatate gallium Ga-68                      | 0.041  | -2.623 |
| C35H41N5O5       | DB13345 | Dihydroergocristine                         | 0.117  | -2.115 |
| C14H22N2O3       | DB09069 | Trimetazidine                               | 0.212  | -2     |
| C13H21NO6        | DB11079 | Trolamine salicylate                        | 0.266  | -1.027 |
| C40H50N8O6       | DB09102 | Daclatasvir                                 | 0.271  | -0.897 |
| C37H47NO12       | DB11753 | Rifamycin                                   | 0.288  | -0.862 |
| C23H30N8O        | DB11730 | Ribociclib                                  | 0.429  | -0.972 |
| C49H54F2N8O6     | DB09027 | Ledipasvir                                  | 0.435  | -1.105 |
| C49H54F2N8O6     | DB09027 | Ledipasvir                                  | 0.451  | -1.617 |
| C13H18CIN3O4S2   | DB13532 | Cyclophentiazide                            | 0.468  | -1.973 |
| C24H29N3O8       | DB12035 | Sarecycline                                 | 0.493  | -2.137 |
| Al2H2Mg2O12Si3   | DB14116 | Silodrate                                   | 0.497  | 0.497  |
| C16H18CIN3S      | DB09241 | Methylene blue                              | 0.504  | -1.562 |
| C13H10O3         | DB11071 | Phenyl salicylate                           | 0.524  | -1.37  |
| C6H15NO3         | DB13747 | Trolamine                                   | 0.529  | -0.765 |
| C47H72NO10P      | DB14096 | 1,2-icosapentoyl-sn-glycero-3-phosphoserine | 0.717  | 0.704  |
| C26H26CIN3       | DB11614 | Rupatadine                                  | 0.858  | -0.947 |
| C65H87GaN14O19S2 | DB13925 | Dotatate gallium Ga-68                      | 0.891  | -0.692 |
| C38H50N6O9S      | DB11575 | Grazoprevir                                 | 0.949  | -1.77  |
| C22H23CIN2O8     | DB09093 | Chlortetracycline                           | 0.988  | -1.304 |
| C31H52O3         | DB14002 | D-alpha-Tocopherol acetate                  | 1.065  | 1.065  |
| C65H87GaN14O19S2 | DB13925 | Dotatate gallium Ga-68                      | 1.118  | 0.112  |
| C59H90O4         | DB09270 | Ubidecarenone                               | 1.618  | 1.618  |
| C27H31FN4O8      | DB12329 | Eravacycline                                | 1.682  | -0.44  |
| C49H54F2N8O6     | DB09027 | Ledipasvir                                  | 1.716  | 1.129  |
| C10H12O3         | DB14177 | Propylparaben                               | 1.73   | -0.352 |
| C11H14O3         | DB14084 | Butylparaben                                | 1.842  | 1.824  |
| C14H12O3         | DB14176 | Benzylparaben                               | 2.086  | 0.169  |
| C47H72NO10P      | DB14096 | 1,2-icosapentoyl-sn-glycero-3-phosphoserine | 3.332  | 1.048  |
| C63H87N13O19S2   | DB12602 | Pentetreotide                               | 3.976  | 2.518  |
| C24H19NO5        | DB14627 | Oxyphenisatin acetate                       | 4.049  | 4.049  |
| C22H19NO4        | DB09020 | Bisacodyl                                   | 4.239  | 1.899  |

### FDA approved drugs with 6y84, Table S10

| FORMULA        | DRUGBANK_ID | GENERIC_NAME | docking score | glide gscore |
|----------------|-------------|--------------|---------------|--------------|
| C25H43NO18     | DB00284     | Acarbose     | -12.507       | -13.139      |
| C25H43NO18     | DB00284     | Acarbose     | -10.525       | -10.775      |
| C52H98N16O13   | DB00803     | Colistin     | -10.271       | -12.63       |
| C55H84N17O21S3 | DB00290     | Bleomycin    | -9.182        | -10.542      |
| C21H29N7O14P2  | DB00157     | NADH         | -9.031        | -9.031       |
| C55H75N17O13   | DB00644     | Gonadorelin  | -8.688        | -9.315       |
| C66H75Cl2N9O24 | DB00512     | Vancomycin   | -8.66         | -9.053       |
| C31H53N3O49S8  | DB00569     | Fondaparinux | -8.617        | -9.283       |
| C23H46N6O13    | DB00452     | Framycetin   | -8.609        | -9.949       |
| C23H46N6O13    | DB00452     | Framycetin   | -8.533        | -10.713      |
| C23H46N6O13    | DB00452     | Framycetin   | -8.478        | -9.518       |
| C22H43N5O13    | DB00479     | Amikacin     | -8.44         | -8.504       |
| C12H22O11      | DB00581     | Lactulose    | -8.109        | -8.109       |
| C27H29NO10     | DB00694     | Daunorubicin | -8.065        | -8.093       |
| C22H43N5O13    | DB00479     | Amikacin     | -7.947        | -10.186      |
| C27H29NO11     | DB00445     | Epirubicin   | -7.915        | -7.942       |
| C50H88N28O15   | DB00314     | Capreomycin  | -7.898        | -8.41        |
| C55H75N17O13   | DB00644     | Gonadorelin  | -7.869        | -8.696       |
| C59H84N18O14   | DB00014     | Goserelin    | -7.577        | -8.403       |
| C23H46N6O13    | DB00452     | Framycetin   | -7.439        | -9.655       |
| C37H49N7O9S    | DB00183     | Pentagastrin | -7.436        | -7.437       |

|                |         |                        |        |        |
|----------------|---------|------------------------|--------|--------|
| C52H88N10O15   | DB00520 | Casposfungin           | -7.431 | -7.439 |
| C29H39N5O8     | DB00560 | Tigecycline            | -7.182 | -7.316 |
| C18H22O4       | DB00179 | Masoprocol             | -7.141 | -7.141 |
| C14H26CaO16    | DB00326 | Calcium glucoheptonate | -7.034 | -7.034 |
| C23H46N6O13    | DB00452 | Framycetin             | -7.015 | -9.175 |
| C20H23N7O7     | DB00650 | Leucovorin             | -6.876 | -6.876 |
| C29H39N5O8     | DB00560 | Tigecycline            | -6.62  | -7.728 |
| C8H12N4O5      | DB00811 | Ribavirin              | -6.58  | -6.58  |
| C46H64N14O12S2 | DB00035 | Desmopressin           | -6.555 | -6.556 |
| C23H34O5       | DB00374 | Treprostinil           | -6.359 | -6.359 |
| C18H23NO3      | DB00841 | Dobutamine             | -6.355 | -6.355 |
| C52H98N16O13   | DB00803 | Colistin               | -6.346 | -7.552 |
| C14H13N5O5S2   | DB00535 | Cefdinir               | -6.333 | -6.333 |
| C25H24N8O7S2   | DB00430 | Cefpiramide            | -6.316 | -6.316 |
| C15H22N6O5S    | DB00118 | Ademetionine           | -6.309 | -6.319 |
| C23H36O7       | DB00175 | Pravastatin            | -6.267 | -6.269 |
| C23H46N6O13    | DB00452 | Framycetin             | -6.238 | -8.752 |
| C23H24N2O4S    | DB00876 | Eprosartan             | -6.219 | -6.251 |
| C25H37NO4      | DB00905 | Bimatoprost            | -6.206 | -6.206 |
| C21H27NO4      | DB00844 | Nalbuphine             | -6.194 | -6.224 |
| C47H73NO17     | DB00681 | Amphotericin B         | -6.158 | -6.196 |
| C50H88N28O15   | DB00314 | Capreomycin            | -6.144 | -7.665 |
| C34H36F3NO13   | DB00385 | Valrubicin             | -6.091 | -6.091 |
| C66H83N17O13   | DB00666 | Nafarelin              | -6.046 | -6.673 |
| C66H83N17O13   | DB00666 | Nafarelin              | -5.984 | -6.52  |
| C14H11NO5      | DB00323 | Tolcapone              | -5.984 | -6.039 |
| C10H13N5O4     | DB00640 | Adenosine              | -5.955 | -5.955 |
| C10H14N5O7P    | DB00131 | Adenosine phosphate    | -5.928 | -6.02  |
| C8H17NO5       | DB00491 | Miglitol               | -5.903 | -5.948 |
| C23H46N6O13    | DB00452 | Framycetin             | -5.88  | -8.51  |
| C17H20N4O6     | DB00140 | Riboflavin             | -5.877 | -5.877 |
| C19H25BN4O4    | DB00188 | Bortezomib             | -5.864 | -5.864 |
| C20H21N7O6S2   | DB00923 | Ceforanide             | -5.82  | -5.844 |
| C26H35F3O6     | DB00287 | Travoprost             | -5.816 | -5.816 |
| C52H98N16O13   | DB00803 | Colistin               | -5.759 | -7.092 |
| C8H14N3O6P     | DB00369 | Cidofovir              | -5.748 | -6.044 |
| C16H21N3O2     | DB00315 | Zolmitriptan           | -5.744 | -5.748 |
| C7H11NO7P2     | DB00884 | Risedronic acid        | -5.728 | -6.521 |
| C20H21N5O6     | DB00642 | Pemetrexed             | -5.692 | -5.692 |
| C12H18N2O4     | DB00211 | Midodrine              | -5.69  | -5.798 |
| C27H44O3       | DB00910 | Paricalcitol           | -5.685 | -5.685 |
| C66H75Cl2N9O24 | DB00512 | Vancomycin             | -5.682 | -7.784 |
| C21H25N5O8S2   | DB00948 | Mezlocillin            | -5.655 | -5.655 |
| C21H22N4O6S    | DB00293 | Raltitrexed            | -5.655 | -5.719 |
| C23H46N6O13    | DB00452 | Framycetin             | -5.654 | -7.93  |
| C24H36O5       | DB00227 | Lovastatin             | -5.615 | -5.615 |
| C4H13NO7P2     | DB00630 | Alendronic acid        | -5.613 | -6.356 |
| C27H44O2       | DB00146 | Calcifediol            | -5.611 | -5.611 |
| C66H75Cl2N9O24 | DB00512 | Vancomycin             | -5.596 | -7.361 |
| C26H44O9       | DB00410 | Mupirocin              | -5.589 | -5.592 |
| C10H11ClFN5O3  | DB00631 | Clofarabine            | -5.568 | -5.568 |
| C17H19NO3      | DB00295 | Morphine               | -5.567 | -5.626 |
| C14H24N2O7     | DB00919 | Spectinomycin          | -5.565 | -5.815 |
| C33H47NO13     | DB00826 | Natamycin              | -5.559 | -5.597 |
| C21H41N5O7     | DB00955 | Netilmicin             | -5.553 | -6.263 |
| C8H15NO6       | DB00141 | N-Acetylglucosamine    | -5.544 | -5.544 |
| C52H98N16O13   | DB00803 | Colistin               | -5.539 | -6.788 |
| C7H11NO7P2     | DB00884 | Risedronic acid        | -5.522 | -5.71  |
| C52H98N16O13   | DB00803 | Colistin               | -5.51  | -7.398 |
| C9H11F2N3O4    | DB00441 | Gemcitabine            | -5.504 | -5.51  |
| C10H12ClN5O3   | DB00242 | Cladribine             | -5.485 | -5.485 |
| C31H53N3O49S8  | DB00569 | Fondaparinux           | -5.438 | -6.06  |
| C19H29NO5      | DB00449 | Dipivefrin             | -5.431 | -5.437 |

|               |         |                         |        |        |
|---------------|---------|-------------------------|--------|--------|
| C18H29NO3     | DB00195 | Betaxolol               | -5.406 | -5.408 |
| C4H13NO7P2    | DB00630 | Alendronic acid         | -5.388 | -5.587 |
| C20H25CIN2O5  | DB00381 | Amlodipine              | -5.387 | -5.391 |
| C6H14O6       | DB00742 | Mannitol                | -5.383 | -5.383 |
| C22H24N2O8    | DB00759 | Tetracycline            | -5.382 | -6.428 |
| C25H47NO8     | DB00429 | Carboprost tromethamine | -5.362 | -5.365 |
| C20H30O       | DB00162 | Vitamin A               | -5.355 | -5.355 |
| C32H45N3O4S   | DB00220 | Nelfinavir              | -5.345 | -5.358 |
| C22H25N3O7S   | DB00303 | Ertapenem               | -5.341 | -5.39  |
| C43H66O14     | DB00511 | Acetyldigitoxin         | -5.333 | -5.333 |
| C23H32N2O5    | DB00178 | Ramipril                | -5.327 | -5.532 |
| C22H26N2O2S   | DB00216 | Eletriptan              | -5.322 | -5.324 |
| C10H11F3N2O5  | DB00432 | Trifluridine            | -5.308 | -5.393 |
| C19H17NO7     | DB00716 | Nedocromil              | -5.305 | -5.305 |
| C22H36N2O5S   | DB00775 | Tirofiban               | -5.303 | -5.303 |
| C22H22N2O8    | DB00931 | Metacycline             | -5.278 | -5.913 |
| C8H15N3O7     | DB00428 | Streptozocin            | -5.255 | -5.255 |
| C17H21NO3     | DB00867 | Ritodrine               | -5.254 | -5.266 |
| C20H34O5      | DB00770 | Alprostadil             | -5.252 | -5.256 |
| C18H31NO4     | DB00612 | Bisoprolol              | -5.216 | -5.218 |
| C32H47F5O3S   | DB00947 | Fulvestrant             | -5.193 | -5.193 |
| C36H47N5O4    | DB00224 | Indinavir               | -5.185 | -5.827 |
| C18H24O2      | DB00783 | Estradiol               | -5.173 | -5.173 |
| C41H64O14     | DB00390 | Digoxin                 | -5.169 | -5.169 |
| C10H17N3O6S   | DB00143 | Glutathione             | -5.165 | -5.171 |
| C32H39NO4     | DB00950 | Fexofenadine            | -5.16  | -5.16  |
| C17H23NO3     | DB00424 | Hyoscyamine             | -5.146 | -5.148 |
| C17H25N3O2S   | DB00918 | Almotriptan             | -5.135 | -5.139 |
| C9H11N2O5     | DB00249 | Idoxuridine             | -5.134 | -5.148 |
| C15H12I3NO4   | DB00279 | Liothyronine            | -5.13  | -5.232 |
| C32H32O13S    | DB00444 | Teniposide              | -5.127 | -5.127 |
| C12H20N4O7    | DB00558 | Zanamivir               | -5.121 | -5.122 |
| C15H15NO2S    | DB00745 | Modafinil               | -5.111 | -5.111 |
| C21H26N2O7    | DB00393 | Nimodipine              | -5.106 | -5.106 |
| C37H48N6O5S2  | DB00503 | Ritonavir               | -5.104 | -5.104 |
| C19H19N7O6    | DB00158 | Folic acid              | -5.1   | -5.278 |
| C18H23N9O4S3  | DB00229 | Cefotiam                | -5.086 | -5.186 |
| C21H21CIN2O8  | DB00618 | Demeclocycline          | -5.084 | -5.281 |
| C52H98N16O13  | DB00803 | Colistin                | -5.084 | -6.479 |
| C22H24N2O9    | DB00595 | Oxytetracycline         | -5.081 | -5.74  |
| C29H32O13     | DB00773 | Etoposide               | -5.073 | -5.073 |
| C30H53NO11    | DB00868 | Benzonatate             | -5.07  | -5.07  |
| C10H14N5O7P   | DB00131 | Adenosine phosphate     | -5.068 | -6.217 |
| C17H20N2O2    | DB00809 | Tropicamide             | -5.063 | -5.071 |
| C20H29N3O2    | DB00527 | Cinchocaine             | -5.062 | -5.066 |
| C19H24N4O2    | DB00738 | Pentamidine             | -5.059 | -5.059 |
| C25H37NO4     | DB00938 | Salmeterol              | -5.05  | -5.055 |
| C16H17N9O5S3  | DB00267 | Cefmenoxime             | -5.047 | -5.047 |
| C18H20O2      | DB00255 | Diethylstilbestrol      | -5.046 | -5.047 |
| C21H21CIN2O8  | DB00618 | Demeclocycline          | -5.044 | -6.077 |
| C52H98N16O13  | DB00803 | Colistin                | -5.043 | -6.33  |
| C10H18O21S4   | DB00686 | Pentosan Polysulfate    | -5.039 | -5.039 |
| C10H13N5O4    | DB00495 | Zidovudine              | -5.038 | -5.038 |
| C33H37N5O5    | DB00320 | Dihydroergotamine       | -5.037 | -5.087 |
| C17H25N3O2S   | DB00952 | Naratriptan             | -5.032 | -5.034 |
| C10H14N4O4    | DB00651 | Dyphylline              | -5.026 | -5.026 |
| C27H44O3      | DB00136 | Calcitriol              | -5.003 | -5.003 |
| C18H37N5O9    | DB00684 | Tobramycin              | -5.002 | -6.529 |
| C21H41N5O7    | DB00955 | Netilmicin              | -4.991 | -6.759 |
| C11H12CI2N2O5 | DB00446 | Chloramphenicol         | -4.988 | -4.988 |
| C23H46N6O13   | DB00452 | Framycetin              | -4.971 | -5.957 |
| C16H18N2O5S   | DB00417 | Phenoxymethylpenicillin | -4.969 | -4.969 |
| C3H11NO7P2    | DB00282 | Pamidronic acid         | -4.967 | -6.021 |



|                |         |                     |        |        |
|----------------|---------|---------------------|--------|--------|
| C9H15N5O3      | DB00360 | Sapropterin         | -4.966 | -4.978 |
| C17H18N2O6S    | DB00578 | Carbenicillin       | -4.963 | -4.963 |
| C21H29NO       | DB00810 | Biperiden           | -4.959 | -4.96  |
| C26H40O5       | DB00654 | Latanoprost         | -4.948 | -4.948 |
| C20H22CIN3O    | DB00613 | Amodiaquine         | -4.937 | -5.228 |
| C27H41NO6      | DB00769 | Hydrocortamate      | -4.933 | -5.031 |
| C17H23NO3      | DB00572 | Atropine            | -4.928 | -4.93  |
| C52H98N16O13   | DB00803 | Colistin            | -4.923 | -6.317 |
| C20H23NO4      | DB00704 | Naltrexone          | -4.908 | -4.956 |
| C12H20N2O3S    | DB00489 | Sotalol             | -4.905 | -4.926 |
| C27H36N2O4     | DB00912 | Repaglinide         | -4.9   | -4.908 |
| C16H14CIN3O    | DB00475 | Chlordiazepoxide    | -4.899 | -4.946 |
| C21H29FO5      | DB00687 | Fludrocortisone     | -4.897 | -4.897 |
| C27H29NO10     | DB00694 | Daunorubicin        | -4.897 | -6.737 |
| C23H21F7N4O3   | DB00673 | Aprepitant          | -4.894 | -4.894 |
| C19H20N2O2     | DB00812 | Phenylbutazone      | -4.892 | -4.9   |
| C17H21NO4      | DB00747 | Scopolamine         | -4.888 | -5.101 |
| C17H25N3O5S    | DB00760 | Meropenem           | -4.865 | -4.894 |
| C3H11NO7P2     | DB00282 | Pamidronic acid     | -4.856 | -4.966 |
| C10H15N5O3     | DB00299 | Penciclovir         | -4.846 | -4.846 |
| C27H29NO11     | DB00445 | Epirubicin          | -4.832 | -6.672 |
| C8H14N3O6P     | DB00369 | Cidofovir           | -4.831 | -5.384 |
| C16H15N5O7S2   | DB00671 | Cefixime            | -4.819 | -4.819 |
| C19H25NO       | DB00504 | Levallorphan        | -4.812 | -4.839 |
| C20H24N2O      | DB00192 | Indecainide         | -4.811 | -4.811 |
| C9H13NO3       | DB00668 | Epinephrine         | -4.811 | -4.822 |
| C22H29ClO5     | DB00240 | Alclometasone       | -4.807 | -4.807 |
| C13H8F2O3      | DB00861 | Diflunisal          | -4.807 | -4.807 |
| C29H38N4O10    | DB00256 | Lymecycline         | -4.8   | -4.962 |
| C9H11FN2O5     | DB00322 | Floxuridine         | -4.799 | -4.828 |
| C17H17NO2      | DB00714 | Apomorphine         | -4.797 | -6.361 |
| CH4Cl2O6P2     | DB00720 | Clodronic acid      | -4.796 | -4.801 |
| C16H17N5O7S2   | DB00493 | Cefotaxime          | -4.795 | -4.795 |
| C26H28ClNO     | DB00539 | Toremifene          | -4.79  | -4.81  |
| C52H98N16O13   | DB00803 | Colistin            | -4.755 | -6.195 |
| C21H27CIN2O2   | DB00557 | Hydroxyzine         | -4.747 | -5.065 |
| C18H23N9O4S3   | DB00229 | Cefotiam            | -4.743 | -5.845 |
| C20H28N2O5     | DB00584 | Enalapril           | -4.737 | -4.932 |
| C9H23NO7P2     | DB00710 | Ibandronate         | -4.736 | -4.827 |
| C14H21N3O2S    | DB00669 | Sumatriptan         | -4.725 | -4.729 |
| C20H12O5       | DB00693 | Fluorescein         | -4.703 | -4.919 |
| C33H35N5O5     | DB00696 | Ergotamine          | -4.698 | -4.875 |
| C21H26O5       | DB00635 | Prednisone          | -4.694 | -4.694 |
| C21H43N5O7     | DB00798 | Gentamicin          | -4.687 | -4.863 |
| C22H28GdN3O11  | DB00743 | Gadobenic acid      | -4.682 | -4.862 |
| C11H16N4O4     | DB00552 | Pentostatin         | -4.68  | -4.712 |
| C22H26N2O4S    | DB00343 | Diltiazem           | -4.678 | -4.696 |
| C16H21NO2      | DB00571 | Propranolol         | -4.678 | -4.679 |
| C22H22N6O7S2   | DB00438 | Ceftazidime         | -4.676 | -4.676 |
| C49H66N10O10S2 | DB00104 | Octreotide          | -4.673 | -4.886 |
| C21H30O5       | DB00741 | Hydrocortisone      | -4.673 | -4.673 |
| C52H98N16O13   | DB00803 | Colistin            | -4.672 | -6.183 |
| C19H32N2O5     | DB00790 | Perindopril         | -4.668 | -4.922 |
| C22H43N5O13    | DB00479 | Amikacin            | -4.666 | -6.168 |
| C22H29FO5      | DB00443 | Betamethasone       | -4.664 | -4.664 |
| C18H19N3O6S    | DB00689 | Cephaloglycin       | -4.66  | -4.91  |
| C22H24N2O8     | DB00254 | Doxycycline         | -4.66  | -4.892 |
| C15H17FN4O3    | DB00467 | Enoxacin            | -4.653 | -4.701 |
| C14H24N2O7     | DB00919 | Spectinomycin       | -4.647 | -5.479 |
| C13H24NO10P    | DB00144 | Phosphatidyl serine | -4.646 | -4.659 |
| C19H22FN3O3    | DB00365 | Grepafloxacin       | -4.643 | -5.651 |
| C22H28F2O5     | DB00223 | Diflorasone         | -4.631 | -4.631 |
| C18H19NOS      | DB00476 | Duloxetine          | -4.63  | -4.631 |

|                |         |                             |        |        |
|----------------|---------|-----------------------------|--------|--------|
| C23H27N5O7S    | DB00319 | Piperacillin                | -4.629 | -4.63  |
| C10H13N5O4     | DB00194 | Vidarabine                  | -4.628 | -4.628 |
| C5H10N2O7P2    | DB00399 | Zoledronic acid             | -4.625 | -5.132 |
| C9H23NO7P2     | DB00710 | Ibandronate                 | -4.623 | -5.792 |
| C23H32N2O5     | DB00178 | Ramipril                    | -4.618 | -5.344 |
| C15H12N2O2     | DB00776 | Oxcarbazepine               | -4.617 | -4.617 |
| C14H11Cl2NO2   | DB00939 | Meclofenamic acid           | -4.614 | -4.615 |
| C18H22O2       | DB00655 | Estrone                     | -4.614 | -4.614 |
| C17H18FN3O3    | DB00537 | Ciprofloxacin               | -4.608 | -5.712 |
| C20H32O5       | DB00917 | Dinoprostone                | -4.605 | -4.608 |
| C31H53N3O49S8  | DB00569 | Fondaparinux                | -4.597 | -5.265 |
| C12H15N5O3     | DB00442 | Entecavir                   | -4.596 | -4.596 |
| C26H37N5O2     | DB00248 | Cabergoline                 | -4.593 | -5.261 |
| C20H30NO3      | DB00332 | Ipratropium                 | -4.591 | -4.591 |
| C21H24F3N3S    | DB00831 | Trifluoperazine             | -4.59  | -4.87  |
| C9H13N3O3      | DB00943 | Zalcitabine                 | -4.588 | -4.588 |
| C18H21NO3      | DB00318 | Codeine                     | -4.587 | -4.633 |
| C19H27NO       | DB00652 | Pentazocine                 | -4.577 | -4.588 |
| C21H19N3O3S    | DB00276 | Amsacrine                   | -4.576 | -4.595 |
| C19H19N7O6     | DB00158 | Folic acid                  | -4.571 | -5.916 |
| C16H24N2O3     | DB00521 | Carteolol                   | -4.57  | -4.571 |
| C21H28N2O5     | DB00662 | Trimethobenzamide           | -4.569 | -4.589 |
| C16H19ClN2O    | DB00748 | Carbinoxamine               | -4.561 | -4.566 |
| C22H28ClFO4    | DB00838 | Clocortolone                | -4.56  | -4.56  |
| C13H21NO3      | DB00221 | Isoetarine                  | -4.558 | -4.558 |
| C18H18O2       | DB00890 | Dienestrol                  | -4.558 | -4.558 |
| C20H24ClN3S    | DB00433 | Prochlorperazine            | -4.556 | -4.836 |
| C8H11NO3       | DB00368 | Norepinephrine              | -4.553 | -4.57  |
| C28H44O        | DB00153 | Ergocalciferol              | -4.547 | -4.547 |
| C23H36N6O5S    | DB00278 | Argatroban                  | -4.546 | -4.546 |
| C24H33FO6      | DB00846 | Flurandrenolide             | -4.545 | -4.545 |
| C19H17Cl2N3O5S | DB00485 | Dicloxacillin               | -4.544 | -4.544 |
| C10H21NO4      | DB00419 | Miglustat                   | -4.534 | -4.553 |
| C22H30Cl2N10   | DB00878 | Chlorhexidine               | -4.533 | -4.543 |
| C17H21NO3      | DB00749 | Etodolac                    | -4.521 | -4.522 |
| C15H11I4NO4    | DB00509 | Dextrothyroxine             | -4.521 | -4.645 |
| C11H13N3O3S    | DB00263 | Sulfisoxazole               | -4.52  | -4.52  |
| C26H28ClNO     | DB00882 | Clomifene                   | -4.52  | -4.54  |
| C20H25N3O2     | DB00353 | Methylephedrine             | -4.518 | -4.771 |
| C19H28O2       | DB00624 | Testosterone                | -4.518 | -4.518 |
| C11H15NO5      | DB00423 | Methocarbamol               | -4.514 | -4.514 |
| C15H11I4NO4    | DB00451 | Levothyroxine               | -4.505 | -4.629 |
| C10H14O4       | DB00874 | Guafenesin                  | -4.504 | -4.504 |
| C22H30O        | DB00304 | Desogestrel                 | -4.502 | -4.502 |
| C49H66N10O10S2 | DB00104 | Octreotide                  | -4.496 | -5.206 |
| C21H27N3O2     | DB00247 | Methysergide                | -4.495 | -4.748 |
| C10H12N2O4     | DB00649 | Stavudine                   | -4.494 | -4.496 |
| C18H19N3O3S    | DB00412 | Rosiglitazone               | -4.492 | -5.016 |
| C21H26ClN3OS   | DB00850 | Perphenazine                | -4.491 | -5.038 |
| C22H26F3N3OS   | DB00623 | Fluphenazine                | -4.49  | -5.037 |
| C19H22FN3O3    | DB00365 | Grepafloxacin               | -4.486 | -4.606 |
| C21H27FO6      | DB00620 | Triamcinolone               | -4.485 | -4.485 |
| C18H24BrNO4    | DB00462 | Methscopolamine bromide     | -4.483 | -4.483 |
| C19H24N2O3     | DB00598 | Labetalol                   | -4.483 | -4.511 |
| C19H23N3O4S    | DB00739 | Hetacillin                  | -4.482 | -4.485 |
| C27H44O        | DB00169 | Cholecalciferol             | -4.479 | -4.479 |
| C8H9NO5        | DB00766 | Clavulanic acid             | -4.46  | -4.46  |
| C26H34FNO5     | DB00439 | Cerivastatin                | -4.459 | -4.482 |
| C20H22N8O5     | DB00563 | Methotrexate                | -4.458 | -4.523 |
| C46H58N4O9     | DB00570 | Vinblastine                 | -4.456 | -5.873 |
| C30H46NO7P     | DB00492 | Fosinopril                  | -4.444 | -4.445 |
| C22H28F2O5     | DB00663 | Flumethasone                | -4.444 | -4.444 |
| C28H37ClO7     | DB00394 | Beclomethasone dipropionate | -4.44  | -4.44  |

|               |         |                              |        |        |
|---------------|---------|------------------------------|--------|--------|
| C20H21FN2O    | DB00215 | Citalopram                   | -4.439 | -4.441 |
| C20H26O2      | DB00717 | Norethisterone               | -4.438 | -4.438 |
| C21H28O2      | DB00367 | Levonorgestrel               | -4.41  | -4.41  |
| C25H48N6O8    | DB00746 | Deferoxamine                 | -4.409 | -4.409 |
| C19H29NO      | DB00942 | Cycrimine                    | -4.407 | -4.408 |
| C11H17NO3     | DB00816 | Orciprenaline                | -4.403 | -4.417 |
| C20H28N2O3    | DB00383 | Oxyphencyclimine             | -4.395 | -4.395 |
| C19H16O4      | DB00682 | Warfarin                     | -4.391 | -4.412 |
| C43H55N5O7    | DB00309 | Vindesine                    | -4.391 | -5.188 |
| C7H15Cl2N2O2P | DB00531 | Cyclophosphamide             | -4.391 | -4.391 |
| C16H13N3O3    | DB00643 | Mebendazole                  | -4.39  | -5.073 |
| C16H25NO2     | DB00193 | Tramadol                     | -4.389 | -4.392 |
| C55H75N17O13  | DB00644 | Gonadorelin                  | -4.387 | -4.922 |
| C16H16ClN3O4  | DB00447 | Loracarbef                   | -4.381 | -4.932 |
| C22H29N3S2    | DB00372 | Thiethylperazine             | -4.38  | -4.66  |
| C25H30N2O5    | DB00881 | Quinapril                    | -4.378 | -4.531 |
| C15H15NO2     | DB00784 | Mefenamic acid               | -4.375 | -4.376 |
| C28H46N6O8S   | DB00895 | Benzylpenicilloyl Polylysine | -4.374 | -4.374 |
| C14H10F3NO5   | DB00348 | Nitisinone                   | -4.368 | -4.368 |
| C15H17N7O5S3  | DB00274 | Cefmetazole                  | -4.363 | -4.363 |
| C27H41NO6     | DB00769 | Hydrocortamate               | -4.363 | -5.478 |
| C29H39N5O8    | DB00560 | Tigecycline                  | -4.361 | -6.327 |
| C11H16N4O4    | DB00380 | Dexrazoxane                  | -4.361 | -4.969 |
| C12H8O4       | DB00553 | Methoxsalen                  | -4.361 | -4.361 |
| C27H29N5O6S   | DB00559 | Bosentan                     | -4.359 | -4.359 |
| C16H11ClN2O3  | DB00628 | Clorazepic acid              | -4.358 | -4.358 |
| C52H98N16O13  | DB00803 | Colistin                     | -4.356 | -6.643 |
| C22H24ClFN4O3 | DB00317 | Gefitinib                    | -4.353 | -4.759 |
| C18H19N3O3S   | DB00412 | Rosiglitazone                | -4.347 | -4.914 |
| C8H12N4O5     | DB00928 | Azacitidine                  | -4.341 | -4.758 |
| C16H23BrN2O3  | DB00409 | Remoxipride                  | -4.338 | -4.339 |
| C20H24N2O6    | DB00401 | Nisoldipine                  | -4.336 | -4.336 |
| C22H24N2O8    | DB00254 | Doxycycline                  | -4.336 | -5.03  |
| C21H26NO3     | DB00940 | Methantheleine               | -4.335 | -4.335 |
| C13H13N3O3    | DB00480 | Lenalidomide                 | -4.335 | -4.335 |
| C12H17N4OS    | DB00152 | Thiamine                     | -4.331 | -4.35  |
| C21H27NO4     | DB00844 | Nalbuphine                   | -4.33  | -6.289 |
| C5H10N2O7P2   | DB00399 | Zoledronic acid              | -4.328 | -4.873 |
| C20H24N2O2    | DB00468 | Quinine                      | -4.328 | -4.343 |
| C9H18N2O4     | DB00371 | Meprobamate                  | -4.328 | -4.328 |
| C22H38O5      | DB00929 | Misoprostol                  | -4.327 | -4.327 |
| C16H16ClN3O4  | DB00447 | Loracarbef                   | -4.324 | -4.621 |
| C10H16Br2N2O2 | DB00236 | Pipobroman                   | -4.321 | -4.321 |
| C29H38N4O10   | DB00256 | Lymecycline                  | -4.317 | -6.446 |
| C8H11N3O3S    | DB00709 | Lamivudine                   | -4.308 | -4.308 |
| C17H18F3NO    | DB00472 | Fluoxetine                   | -4.306 | -4.306 |
| C16H16N2O6S2  | DB00456 | Cefalotin                    | -4.305 | -4.305 |
| C15H21F3N2O2  | DB00176 | Fluvoxamine                  | -4.294 | -4.297 |
| C16H13ClN2O   | DB00579 | Mazindol                     | -4.292 | -4.3   |
| C22H29FO4     | DB00547 | Desoximetasone               | -4.292 | -4.292 |
| C22H24ClFN4O3 | DB00317 | Gefitinib                    | -4.291 | -4.706 |
| C17H19NO3     | DB00295 | Morphine                     | -4.288 | -5.775 |
| C21H27ClN2O2  | DB00557 | Hydroxyzine                  | -4.288 | -4.891 |
| C23H46N6O13   | DB00452 | Framycetin                   | -4.286 | -6.147 |
| C15H14ClN3O4S | DB00833 | Cefaclor                     | -4.281 | -4.514 |
| C17H20FN3O3   | DB00487 | Pefloxacin                   | -4.281 | -5.408 |
| C22H23ClN6O   | DB00678 | Losartan                     | -4.279 | -4.279 |
| C19H12O6      | DB00266 | Dicoumarol                   | -4.279 | -4.393 |
| C13H18N4O3    | DB00806 | Pentoxifylline               | -4.278 | -4.278 |
| C14H19Cl2N2O2 | DB00291 | Chlorambucil                 | -4.269 | -4.272 |
| C8H15N7O2S3   | DB00927 | Famotidine                   | -4.262 | -4.747 |
| C17H19N3O3S   | DB00338 | Omeprazole                   | -4.256 | -4.29  |
| C21H28O5      | DB00860 | Prednisolone                 | -4.254 | -4.254 |

|               |         |                       |        |        |
|---------------|---------|-----------------------|--------|--------|
| C31H33F3N2O5S | DB00932 | Tipranavir            | -4.254 | -4.392 |
| C15H12N2O     | DB00564 | Carbamazepine         | -4.252 | -4.252 |
| C11H12N2O2S   | DB00744 | Zileuton              | -4.252 | -4.271 |
| C21H30O2      | DB00470 | Dronabinol            | -4.248 | -4.248 |
| C19H21N3O5    | DB00270 | Isradipine            | -4.239 | -4.239 |
| C23H31NO7     | DB00688 | Mycophenolate mofetil | -4.236 | -4.305 |
| C13H14N2O3    | DB00849 | Methyphenobarbital    | -4.236 | -4.323 |
| C15H14N4O     | DB00238 | Nevirapine            | -4.233 | -4.233 |
| C18H19N3O3S   | DB00412 | Rosiglitazone         | -4.231 | -5.565 |
| C22H22FN3O2   | DB00450 | Droperidol            | -4.23  | -4.329 |
| C26H29NO      | DB00675 | Tamoxifen             | -4.229 | -4.249 |
| C11H17NO3     | DB00723 | Methoxamine           | -4.227 | -4.237 |
| C25H38O5      | DB00641 | Simvastatin           | -4.226 | -4.226 |
| C21H21N       | DB00735 | Naftifine             | -4.224 | -4.304 |
| C26H31Cl2N5O3 | DB00251 | Terconazole           | -4.224 | -4.47  |
| C52H98N16O13  | DB00803 | Colistin              | -4.217 | -6.601 |
| C8H5F3N2OS    | DB00740 | Riluzole              | -4.214 | -4.214 |
| C20H21N7O6S2  | DB00923 | Ceforanide            | -4.214 | -6.123 |
| C7H10N2OS     | DB00550 | Propylthiouracil      | -4.213 | -4.251 |
| C16H17N3O4S   | DB00567 | Cephalexin            | -4.204 | -4.82  |
| C21H26N2OS2   | DB00933 | Mesoridazine          | -4.196 | -4.197 |
| C18H19N3O     | DB00904 | Ondansetron           | -4.195 | -4.32  |
| C20H17FO3S    | DB00605 | Sulindac              | -4.189 | -4.189 |
| C17H20FN3O3   | DB00487 | Pefloxacin            | -4.187 | -4.348 |
| C22H29FO4     | DB00324 | Fluorometholone       | -4.184 | -4.184 |
| C24H31FO6     | DB00180 | Flunisolide           | -4.184 | -4.184 |
| C21H41N5O7    | DB00955 | Netilmicin            | -4.184 | -5.278 |
| C10H16N2O3S   | DB00121 | Biotin                | -4.181 | -4.184 |
| C13H16N2      | DB00633 | Dexmedetomidine       | -4.18  | -4.899 |
| C13H12Cl2O4   | DB00903 | Etacrynic acid        | -4.166 | -4.166 |
| C21H21ClN4OS  | DB00246 | Ziprasidone           | -4.166 | -4.397 |
| C14H22N2O3    | DB00335 | Atenolol              | -4.161 | -4.162 |
| C11H9B3N2O4   | DB00271 | Diatrizoate           | -4.148 | -4.148 |
| C21H24FN3O4   | DB00218 | Moxifloxacin          | -4.144 | -5.242 |
| C16H14F3N3O2S | DB00448 | Lansoprazole          | -4.141 | -4.161 |
| C17H14O4S     | DB00533 | Rofecoxib             | -4.141 | -4.141 |
| C5H10N2O7P2   | DB00399 | Zoledronic acid       | -4.139 | -5.503 |
| C25H30NO3     | DB00209 | Trospium              | -4.136 | -4.136 |
| C22H28Cl2O4   | DB00764 | Mometasone            | -4.133 | -4.133 |
| C8H11NO3      | DB00165 | Pyridoxine            | -4.126 | -4.841 |
| C28H35FO7     | DB00288 | Amcinonide            | -4.124 | -4.124 |
| C22H23N3O4    | DB00530 | Erlotinib             | -4.124 | -4.124 |
| C18H19ClN4    | DB00363 | Clozapine             | -4.123 | -4.149 |
| C15H16O2      | DB00461 | Nabumetone            | -4.122 | -4.122 |
| C20H28N2O5    | DB00584 | Enalapril             | -4.117 | -4.868 |
| C24H30O6      | DB00700 | Eplerenone            | -4.116 | -4.116 |
| C22H26F3N3OS  | DB00623 | Fluphenazine          | -4.114 | -4.45  |
| C13H20N6O4    | DB00577 | Valaciclovir          | -4.111 | -4.317 |
| C18H24N4O     | DB00889 | Granisetron           | -4.108 | -4.109 |
| C47H75NO17    | DB00646 | Nystatin              | -4.107 | -4.139 |
| C15H14ClN3O4S | DB00833 | Cefaclor              | -4.107 | -4.775 |
| C20H30O2      | DB00159 | Icosapent             | -4.107 | -4.11  |
| C20H32N5O8P   | DB00718 | Adefovir dipivoxil    | -4.105 | -4.105 |
| C9H11ClO3     | DB00856 | Chlorphenesin         | -4.102 | -4.102 |
| C9H7Cl2N5     | DB00555 | Lamotrigine           | -4.099 | -4.127 |
| C5H10N2O7P2   | DB00399 | Zoledronic acid       | -4.099 | -5.631 |
| C7H7NO3       | DB00233 | Aminosalicylic Acid   | -4.094 | -4.095 |
| C20H24N2O2    | DB00908 | Quinidine             | -4.086 | -4.101 |
| C19H12O6      | DB00266 | Dicoumarol            | -4.084 | -5.143 |
| C21H22N2O5S   | DB00607 | Nafcillin             | -4.082 | -4.082 |
| C14H18N4O3    | DB00440 | Trimethoprim          | -4.08  | -4.55  |
| C8H11Cl2N3O2  | DB00791 | Uracil mustard        | -4.072 | -4.096 |
| C33H47NO13    | DB00826 | Natamycin             | -4.061 | -5.702 |

|                |         |                             |        |        |
|----------------|---------|-----------------------------|--------|--------|
| C9H13NO2       | DB00610 | Metaraminol                 | -4.058 | -4.068 |
| C19H21N        | DB00540 | Nortriptyline               | -4.057 | -4.057 |
| C14H14O3       | DB00788 | Naproxen                    | -4.055 | -4.056 |
| C12H14N2O2     | DB00794 | Primidone                   | -4.052 | -4.052 |
| C11H14N2O4     | DB00949 | Felbamate                   | -4.052 | -4.052 |
| C22H29NO2      | DB00647 | Dextropropoxyphene          | -4.05  | -4.054 |
| C24H34O4       | DB00603 | Medroxyprogesterone acetate | -4.049 | -4.049 |
| C24H34N2O5     | DB00519 | Trandolapril                | -4.049 | -4.254 |
| C14H18N4O3     | DB00440 | Trimethoprim                | -4.045 | -4.677 |
| C21H41N5O7     | DB00955 | Netilmicin                  | -4.045 | -6.575 |
| C17H19CIN2S    | DB00477 | Chlorpromazine              | -4.042 | -4.043 |
| C19H30O3       | DB00621 | Oxandrolone                 | -4.038 | -4.038 |
| C21H30O2       | DB00396 | Progesterone                | -4.038 | -4.038 |
| C17H21NO3      | DB00674 | Galantamine                 | -4.035 | -4.052 |
| C13H17NO       | DB00265 | Crotamiton                  | -4.035 | -4.035 |
| C15H14O3       | DB00573 | Fenoprofen                  | -4.034 | -4.035 |
| C17H14N2O3     | DB00817 | Rosoxacin                   | -4.034 | -5.308 |
| C24H32O4       | DB00823 | Ethynodiol diacetate        | -4.034 | -4.034 |
| C23H25N5O5     | DB00590 | Doxazosin                   | -4.031 | -5.07  |
| C24H28N2O5     | DB00542 | Benazepril                  | -4.03  | -4.387 |
| C19H17CIFN3O5S | DB00301 | Flucloxacillin              | -4.026 | -4.026 |
| C8H15N7O2S3    | DB00927 | Famotidine                  | -4.024 | -5.004 |
| C21H34NO3      | DB00219 | Oxyphenonium                | -4.018 | -4.018 |
| C36H47N5O4     | DB00224 | Indinavir                   | -4.014 | -5.16  |
| C19H21N3O      | DB00425 | Zolpidem                    | -4.013 | -4.356 |
| C19H27NO3      | DB00731 | Nateglinide                 | -4.012 | -4.012 |
| C8H17NO5       | DB00491 | Miglitol                    | -4.009 | -5.568 |
| C24H26N6O3     | DB00275 | Olmesartan                  | -4.009 | -5.122 |
| C17H14F3N3O2S  | DB00482 | Celecoxib                   | -4.006 | -4.007 |
| C21H27NO       | DB00333 | Methadone                   | -4.005 | -4.008 |
| C18H16O3       | DB00946 | Phenprocoumon               | -4     | -4.049 |
| C13H16N2O2     | DB00357 | Aminoglutethimide           | -3.998 | -3.999 |
| C17H25N3O5S    | DB00760 | Meropenem                   | -3.998 | -5.799 |
| C19H16CINO4    | DB00328 | Indometacin                 | -3.995 | -3.996 |
| C21H31N3O5     | DB00722 | Lisinopril                  | -3.995 | -4.991 |
| C18H37N5O9     | DB00684 | Tobramycin                  | -3.991 | -4.262 |
| C12H12N2O2S    | DB00250 | Dapsone                     | -3.99  | -3.99  |
| C21H26CIN3OS   | DB00850 | Perphenazine                | -3.987 | -4.324 |
| C11H11NO2      | DB00832 | Phensuximide                | -3.983 | -3.983 |
| C17H17ClO6     | DB00400 | Griseofulvin                | -3.982 | -3.982 |
| C20H21N        | DB00924 | Cyclobenzaprine             | -3.973 | -3.977 |
| C14H22N2O      | DB00281 | Lidocaine                   | -3.972 | -3.993 |
| C9H15N5O       | DB00350 | Minoxidil                   | -3.97  | -3.97  |
| C21H23NO3      | DB00768 | Olopatadine                 | -3.965 | -3.965 |
| C22H26NO3      | DB00771 | Clidinium                   | -3.964 | -3.964 |
| C19H17Cl3N2S   | DB00639 | Butoconazole                | -3.964 | -4.408 |
| C12H11N7       | DB00384 | Triamterene                 | -3.962 | -3.963 |
| C15H12I3NO4    | DB00279 | Liothyronine                | -3.96  | -5.051 |
| C17H21NO       | DB00289 | Atomoxetine                 | -3.954 | -3.955 |
| C35H36CINO3S   | DB00471 | Montelukast                 | -3.954 | -3.954 |
| C10H19N3O2     | DB00226 | Guanadrel                   | -3.952 | -3.952 |
| C21H28O2       | DB00378 | Dydrogesterone              | -3.951 | -3.951 |
| C11H12N4O3S    | DB00664 | Sulfametopyrazine           | -3.948 | -4.062 |
| C18H37N5O9     | DB00684 | Tobramycin                  | -3.946 | -5.557 |
| C47H73NO17     | DB00681 | Amphotericin B              | -3.939 | -5.579 |
| C14H11Cl2NO2   | DB00586 | Diclofenac                  | -3.938 | -3.94  |
| C8H10FN3O3S    | DB00879 | Emtricitabine               | -3.935 | -3.935 |
| C10H19O6PS2    | DB00772 | Malathion                   | -3.934 | -3.934 |
| C17H28N2O3     | DB00892 | Oxybuprocaine               | -3.933 | -3.954 |
| C17H21NO4      | DB00747 | Scopolamine                 | -3.931 | -4.641 |
| C14H18N2O3     | DB00474 | Methohexital                | -3.927 | -3.984 |
| C19H21N5O2     | DB00670 | Pirenzepine                 | -3.925 | -4.21  |
| C16H16CINO2S   | DB00758 | Clopidogrel                 | -3.924 | -3.947 |

|              |         |                        |        |        |
|--------------|---------|------------------------|--------|--------|
| C19H19N7O6   | DB00158 | Folic acid             | -3.92  | -5.061 |
| C9H4Cl3IO    | DB00793 | Haloproglin            | -3.916 | -3.916 |
| C14H16N4     | DB00724 | Imiquimod              | -3.914 | -4.4   |
| C18H19N3O6S  | DB00689 | Cephaloglycin          | -3.913 | -4.546 |
| C22H28N6O3S  | DB00705 | Delavirdine            | -3.91  | -4.072 |
| C21H22N4O6S  | DB00293 | Raltitrexed            | -3.91  | -5.258 |
| C17H14N2O3   | DB00817 | Rosoxacin              | -3.902 | -3.976 |
| C10H13NO3    | DB00765 | Metyrosine             | -3.899 | -3.899 |
| C15H19N5     | DB00953 | Rizatriptan            | -3.899 | -3.903 |
| C15H15NO3    | DB00500 | Tolmetin               | -3.898 | -3.899 |
| C21H21ClN4OS | DB00246 | Ziprasidone            | -3.893 | -4.563 |
| C16H16ClNO3  | DB00800 | Fenoldopam             | -3.891 | -3.917 |
| C17H20N4S    | DB00334 | Olanzapine             | -3.889 | -3.932 |
| C14H24N2O7   | DB00919 | Spectinomycin          | -3.886 | -5.255 |
| C17H26N2O    | DB00296 | Ropivacaine            | -3.882 | -3.937 |
| C10H15NO     | DB00852 | Pseudoephedrine        | -3.879 | -3.885 |
| C17H19NO3    | DB00327 | Hydromorphone          | -3.877 | -3.928 |
| C17H16F6N2O  | DB00358 | Mefloquine             | -3.875 | -3.878 |
| C8H15N7O2S3  | DB00927 | Famotidine             | -3.874 | -4.68  |
| C8H10NO6P    | DB00114 | Pyridoxal phosphate    | -3.867 | -5.283 |
| C12H10F3N3O4 | DB00665 | Nilutamide             | -3.863 | -3.863 |
| C16H19N3O4S  | DB00415 | Ampicillin             | -3.862 | -4.538 |
| C17H16ClN3O  | DB00543 | Amoxapine              | -3.853 | -3.866 |
| C20H28O2     | DB00523 | Alitretinoin           | -3.853 | -3.857 |
| C15H13FO2    | DB00712 | Flurbiprofen           | -3.852 | -3.852 |
| C19H24O3     | DB00894 | Testolactone           | -3.852 | -3.852 |
| C19H35NO2    | DB00804 | Dicyclomine            | -3.849 | -3.865 |
| C25H35N3O6S  | DB00701 | Amprenavir             | -3.847 | -3.847 |
| C16H20FN3O4  | DB00601 | Linezolid              | -3.846 | -3.846 |
| C17H19N3O    | DB00692 | Phentolamine           | -3.844 | -3.844 |
| C13H20N2O    | DB00750 | Prilocaine             | -3.84  | -3.902 |
| C59H84N18O14 | DB00014 | Goserelin              | -3.837 | -4.372 |
| C8H11N5O3    | DB00787 | Acyclovir              | -3.835 | -3.835 |
| C20H26N4O    | DB00589 | Lisuride               | -3.831 | -4.269 |
| C14H12O3S    | DB00870 | Suprofen               | -3.829 | -3.829 |
| C21H27ClN2O2 | DB00557 | Hydroxyzine            | -3.828 | -5.553 |
| C15H12ClNO2  | DB00821 | Carprofen              | -3.827 | -3.828 |
| C11H16N4O4   | DB00380 | Dexrazoxane            | -3.826 | -4.699 |
| C12H15N3O2S  | DB00518 | Albendazole            | -3.826 | -3.911 |
| C12H18O      | DB00818 | Propofol               | -3.82  | -3.82  |
| C12H15NO3    | DB00660 | Metaxalone             | -3.819 | -3.819 |
| C16H13ClN2O2 | DB00231 | Temazepam              | -3.817 | -3.817 |
| C24H31ClO7   | DB14596 | Loteprednol etabonate  | -3.816 | -3.816 |
| C8H6N4O5     | DB00698 | Nitrofurantoin         | -3.81  | -3.883 |
| C15H11I4NO4  | DB00451 | Levothyroxine          | -3.81  | -4.798 |
| C16H19BrN2   | DB00405 | Dexbrompheniramine     | -3.805 | -3.805 |
| C8H12N4O5    | DB00928 | Azacitidine            | -3.8   | -6.484 |
| C13H20N6O4   | DB00577 | Valaciclovir           | -3.796 | -4.522 |
| C6H6N6O2     | DB00853 | Temozolomide           | -3.796 | -3.797 |
| C22H27ClF2O4 | DB00596 | Ulobetasol             | -3.793 | -3.793 |
| C11H11F3N2O3 | DB00499 | Flutamide              | -3.79  | -3.79  |
| C17H27NO2    | DB00285 | Venlafaxine            | -3.789 | -3.789 |
| C16H13ClN2O2 | DB00349 | Clobazam               | -3.786 | -4.224 |
| C20H24N2OS   | DB00777 | Propiomazine           | -3.784 | -3.785 |
| C25H31F3O5S  | DB00588 | Fluticasone propionate | -3.783 | -3.783 |
| C13H24N4O3S  | DB00373 | Timolol                | -3.781 | -3.782 |
| C17H18FN3O3  | DB00537 | Ciprofloxacin          | -3.781 | -3.88  |
| C12H13ClN4   | DB00205 | Pyrimethamine          | -3.776 | -4.255 |
| C15H10O2     | DB00498 | Phenindione            | -3.772 | -3.773 |
| C15H17FN4O3  | DB00467 | Enoxacin               | -3.762 | -5.385 |
| C9H13NO2     | DB00388 | Phenylephrine          | -3.759 | -3.766 |
| C16H17N3O4S  | DB00567 | Cephalexin             | -3.759 | -4.017 |
| C19H24N2O    | DB00377 | Palonosetron           | -3.758 | -3.759 |

|                |         |                            |        |        |
|----------------|---------|----------------------------|--------|--------|
| C20H34GdN5O10  | DB00538 | Gadoversetamide            | -3.757 | -5.271 |
| C52H98N16O13   | DB00803 | Colistin                   | -3.754 | -6.177 |
| C6H8O6         | DB00126 | Ascorbic acid              | -3.753 | -3.753 |
| C18H18ClN3O    | DB00408 | Loxapine                   | -3.752 | -3.785 |
| C8H10NO6P      | DB00114 | Pyridoxal phosphate        | -3.75  | -3.842 |
| C8H10NO6P      | DB00114 | Pyridoxal phosphate        | -3.747 | -5.705 |
| C12H12N2O3     | DB00779 | Nalidixic acid             | -3.747 | -3.792 |
| C21H26ClNO     | DB00283 | Clemastine                 | -3.746 | -3.747 |
| C12H11ClN2O5S  | DB00695 | Furosemide                 | -3.742 | -3.742 |
| C18H21NO4      | DB00497 | Oxycodone                  | -3.737 | -3.833 |
| C6H8ClN7O      | DB00594 | Amiloride                  | -3.737 | -3.738 |
| C15H14ClN3O4S3 | DB00562 | Benzthiazide               | -3.736 | -4.039 |
| C19H30N5O10P   | DB00300 | Tenofovir disoproxil       | -3.735 | -3.735 |
| C18H19N3O      | DB00904 | Ondansetron                | -3.735 | -4.718 |
| C22H32O3       | DB00253 | Medrysone                  | -3.729 | -3.729 |
| C28H27NO4S     | DB00481 | Raloxifene                 | -3.724 | -3.739 |
| C17H12ClF3N2O  | DB00801 | Halazepam                  | -3.723 | -3.723 |
| C32H26N4O2     | DB00872 | Conivaptan                 | -3.722 | -4.635 |
| C14H11ClN2O4S  | DB00310 | Chlorthalidone             | -3.721 | -3.723 |
| C23H30NO3      | DB00782 | Propantheline              | -3.72  | -3.72  |
| C19H29NO       | DB00387 | Procyclidine               | -3.719 | -3.719 |
| C13H6Cl6O2     | DB00756 | Hexachlorophene            | -3.714 | -3.723 |
| C14H13N3O4S2   | DB00814 | Meloxicam                  | -3.714 | -3.729 |
| C19H24N2       | DB00458 | Imipramine                 | -3.712 | -3.712 |
| C19H21N        | DB00344 | Protriptyline              | -3.709 | -3.709 |
| C16H20N4O3S    | DB00214 | Torsemide                  | -3.704 | -4.13  |
| C24H34N2O5     | DB00519 | Trandolapril               | -3.701 | -4.429 |
| C16H19N3O4S    | DB00415 | Ampicillin                 | -3.699 | -3.927 |
| C11H8O2        | DB00170 | Menadiolone                | -3.691 | -3.691 |
| C15H21NO2      | DB00454 | Meperidine                 | -3.691 | -3.705 |
| C36H42N2       | DB00941 | Hexafluoronium             | -3.686 | -3.686 |
| C18H37N5O9     | DB00684 | Tobramycin                 | -3.684 | -6.282 |
| C20H31NO       | DB00376 | Trihexyphenidyl            | -3.684 | -3.685 |
| C17H32BrNO2    | DB00517 | Anisotropine methylbromide | -3.684 | -3.684 |
| C19H32N2O5     | DB00790 | Perindopril                | -3.682 | -4.305 |
| C23H25F3N2O5   | DB00875 | Flupentixol                | -3.666 | -3.905 |
| C12H12N2O3     | DB00779 | Nalidixic acid             | -3.662 | -5.223 |
| C20H25NO2S2    | DB00906 | Tiagabine                  | -3.662 | -3.662 |
| C11H12N2O2     | DB00754 | Ethotoin                   | -3.659 | -3.659 |
| C22H28N2O2     | DB00913 | Anileridine                | -3.657 | -3.679 |
| C29H38N4O10    | DB00256 | Lymecycline                | -3.655 | -5.515 |
| C17H20N2S      | DB00420 | Promazine                  | -3.652 | -3.653 |
| C9H13NO        | DB00397 | Phenylpropanolamine        | -3.649 | -3.659 |
| C12H9N3O       | DB00235 | Milrinone                  | -3.648 | -3.666 |
| C20H28O2       | DB00755 | Tretinoin                  | -3.647 | -3.651 |
| C10H14N2O4     | DB00190 | Carbidopa                  | -3.645 | -3.645 |
| C5H5N5S        | DB00352 | Tioguanine                 | -3.642 | -3.66  |
| C14H16N4       | DB00724 | Imiquimod                  | -3.64  | -3.984 |
| C24H36O3       | DB00486 | Nabilone                   | -3.639 | -3.639 |
| C16H21N3       | DB00792 | Tripelennamine             | -3.636 | -3.641 |
| C15H11I4NO4    | DB00509 | Dextrothyroxine            | -3.636 | -4.624 |
| C18H28N2O      | DB00297 | Bupivacaine                | -3.635 | -3.689 |
| C17H22N4O      | DB00805 | Minaprine                  | -3.632 | -3.726 |
| C20H26N2       | DB00726 | Trimipramine               | -3.631 | -3.631 |
| C24H26BrN3O3   | DB00699 | Nicergoline                | -3.63  | -5.211 |
| C8H8Cl2N4      | DB00629 | Guanabenz                  | -3.627 | -3.627 |
| C24H32O4S      | DB00421 | Spirolactone               | -3.624 | -3.624 |
| C20H36N2O3S    | DB00308 | Ibutilide                  | -3.622 | -3.633 |
| C12H9N3O5S     | DB00507 | Nitazoxanide               | -3.621 | -3.636 |
| C12H10N2O5     | DB00827 | Cinoxacin                  | -3.618 | -5.462 |
| C16H15F2N3O4S  | DB00213 | Pantoprazole               | -3.618 | -3.92  |
| C18H37N5O9     | DB00684 | Tobramycin                 | -3.616 | -4.969 |
| C16H14F3N5O    | DB00582 | Voriconazole               | -3.615 | -3.615 |

|                |         |                           |        |        |
|----------------|---------|---------------------------|--------|--------|
| C18H14N4O5S    | DB00795 | Sulfasalazine             | -3.613 | -4.92  |
| C10H7Cl2N3O    | DB00261 | Anagrelide                | -3.613 | -3.613 |
| C9H8O4         | DB00945 | Acetylsalicylic acid      | -3.606 | -3.606 |
| C14H10Cl4      | DB00648 | Mitotane                  | -3.603 | -3.603 |
| C9H11NO3       | DB00135 | Tyrosine                  | -3.602 | -3.602 |
| C6H12N2O4S2    | DB00138 | Cystine                   | -3.598 | -3.627 |
| C14H11NO5      | DB00323 | Tolcapone                 | -3.594 | -5.131 |
| C27H38N2O4     | DB00661 | Verapamil                 | -3.593 | -3.598 |
| C17H19N3O3S    | DB00736 | Esomeprazole              | -3.592 | -3.685 |
| C22H28N2O      | DB00813 | Fentanyl                  | -3.588 | -3.605 |
| C17H24BrNO3    | DB00725 | Homatropine methylbromide | -3.587 | -3.588 |
| C22H30N6O4S    | DB00203 | Sildenafil                | -3.586 | -3.768 |
| C12H14N2O2     | DB00532 | Mephenytoin               | -3.574 | -3.574 |
| C16H16ClN3O3S  | DB00524 | Metolazone                | -3.569 | -3.571 |
| C18H19N3O3S    | DB00412 | Rosiglitazone             | -3.568 | -4.945 |
| C15H25NO3      | DB00264 | Metoprolol                | -3.566 | -3.567 |
| C12H10N2O5     | DB00827 | Cinoxacin                 | -3.565 | -3.592 |
| C29H50O2       | DB00163 | Vitamin E                 | -3.562 | -3.562 |
| C24H34O3       | DB00896 | Rimexolone                | -3.562 | -3.562 |
| C19H20FNO3     | DB00715 | Paroxetine                | -3.562 | -3.563 |
| C20H23N        | DB00934 | Maprotiline               | -3.56  | -3.56  |
| C65H82N2O18S2  | DB00732 | Atracurium besylate       | -3.557 | -3.557 |
| C24H30F2O6     | DB00591 | Fluocinolone acetonide    | -3.556 | -3.556 |
| C11H12N2O2     | DB00150 | L-Tryptophan              | -3.554 | -3.554 |
| C19H27N3O5S2   | DB00204 | Dofetilide                | -3.554 | -3.62  |
| C12H18N2O4     | DB00211 | Midodrine                 | -3.554 | -4.615 |
| C7H11NO2       | DB00593 | Ethosuximide              | -3.553 | -3.554 |
| C20H15F3N4O3   | DB00685 | Trovafloxacin             | -3.549 | -3.595 |
| C11H18N2O2S    | DB00599 | Thiopental                | -3.547 | -3.574 |
| C22H17ClN2     | DB00257 | Clotrimazole              | -3.546 | -3.97  |
| C14H16ClN3O4S2 | DB00606 | Cyclothiazide             | -3.543 | -3.555 |
| C12H18N2O3     | DB00418 | Secobarbital              | -3.542 | -3.644 |
| C15H22N6O5S    | DB00118 | Ademetionine              | -3.53  | -5.932 |
| C29H31N7O      | DB00619 | Imatinib                  | -3.528 | -4.283 |
| C9H10N2O3      | DB00345 | Aminohippuric acid        | -3.526 | -3.526 |
| C10H20O        | DB00825 | Levomenthol               | -3.524 | -3.524 |
| C7H7NO3        | DB00244 | Mesalazine                | -3.524 | -3.527 |
| C15H12N2O2     | DB00252 | Phenytoin                 | -3.519 | -3.884 |
| C10H12N4O3     | DB00900 | Didanosine                | -3.518 | -3.601 |
| C6H14FO3P      | DB00677 | Isoflurophate             | -3.511 | -3.511 |
| C10H17N3S      | DB00413 | Pramipexole               | -3.508 | -3.508 |
| C20H26N4O      | DB00589 | Lisuride                  | -3.503 | -3.887 |
| C20H23N        | DB00321 | Amitriptyline             | -3.502 | -3.505 |
| C17H22N2O      | DB00366 | Doxylamine                | -3.5   | -3.504 |
| C8H15NO2       | DB00302 | Tranexamic acid           | -3.497 | -3.497 |
| C17H20N2O5S    | DB00887 | Bumetanide                | -3.491 | -3.491 |
| C18H19F3N2S    | DB00508 | Triflupromazine           | -3.487 | -3.488 |
| C10H16N2O3     | DB00237 | Butabarbital              | -3.487 | -3.522 |
| C21H27N3O2     | DB00247 | Methysergide              | -3.486 | -4.114 |
| C16H13ClN2O    | DB00829 | Diazepam                  | -3.486 | -3.486 |
| C16H13N3O3     | DB00643 | Mebendazole               | -3.482 | -4.096 |
| C21H26N2S2     | DB00679 | Thioridazine              | -3.48  | -3.481 |
| C15H20N2O4S    | DB00414 | Acetohehexamide           | -3.474 | -3.479 |
| C6H6N4O4       | DB00336 | Nitrofurural              | -3.473 | -3.473 |
| C16H13ClN2O2   | DB00349 | Clobazam                  | -3.47  | -3.855 |
| C11H16N2O3     | DB00306 | Talbutal                  | -3.47  | -3.525 |
| C6H7N3O        | DB00951 | Isoniazid                 | -3.47  | -3.471 |
| C19H21N3O      | DB00425 | Zolpidem                  | -3.468 | -3.954 |
| C7H8N4O2       | DB00277 | Theophylline              | -3.466 | -3.498 |
| C17H17ClN6O3   | DB00402 | Eszopiclone               | -3.459 | -3.937 |
| C9H13N         | DB00182 | Amphetamine               | -3.458 | -3.459 |
| C21H29NO2      | DB00611 | Butorphanol               | -3.458 | -3.469 |
| C15H14ClN3O4S3 | DB00562 | Benzthiazide              | -3.452 | -4     |



|                |         |                       |        |        |
|----------------|---------|-----------------------|--------|--------|
| C12H19NO3      | DB00871 | Terbutaline           | -3.449 | -3.463 |
| C8H10N2S       | DB00609 | Ethionamide           | -3.446 | -3.447 |
| C66H75Cl2N9O24 | DB00512 | Vancomycin            | -3.446 | -5.928 |
| C24H26BrN3O3   | DB00699 | Nicergoline           | -3.445 | -3.487 |
| C7H6O3         | DB00936 | Salicylic acid        | -3.44  | -3.44  |
| C15H18N4O5     | DB00305 | Mitomycin             | -3.437 | -3.454 |
| C29H41NO4      | DB00921 | Buprenorphine         | -3.432 | -3.432 |
| C11H17NO       | DB00379 | Mexiletine            | -3.431 | -3.436 |
| C10H21NO4      | DB00419 | Miglustat             | -3.427 | -5.474 |
| C5H10N2O3      | DB00130 | L-Glutamine           | -3.423 | -3.423 |
| C10H12ClNO2    | DB00181 | Baclofen              | -3.422 | -3.422 |
| C27H34N2O7     | DB00691 | Moexipril             | -3.421 | -3.575 |
| C20H34GdN5O10  | DB00538 | Gadoversetamide       | -3.415 | -5.289 |
| C32H41NO2      | DB00342 | Terfenadine           | -3.414 | -3.417 |
| C12H21NO8S     | DB00273 | Topiramate            | -3.412 | -3.422 |
| C31H33N3O6S    | DB00549 | Zafirlukast           | -3.411 | -3.417 |
| C21H28N2O5     | DB00662 | Trimethobenzamide     | -3.409 | -5.422 |
| C8H10N4O2      | DB00824 | Enprofylline          | -3.405 | -3.464 |
| C21H23ClFNO2   | DB00502 | Haloperidol           | -3.405 | -3.418 |
| C16H19BrN2     | DB00835 | Brompheniramine       | -3.404 | -3.404 |
| C6H13NO2       | DB00513 | Aminocaproic Acid     | -3.401 | -3.401 |
| C14H18N2O3     | DB00474 | Methohexital          | -3.4   | -4.812 |
| C14H19N5O4     | DB00426 | Famciclovir           | -3.397 | -3.397 |
| C11H16N4O4     | DB00380 | Dexrazoxane           | -3.392 | -4.585 |
| C6H9N3O2       | DB00117 | Histidine             | -3.387 | -3.821 |
| C14H16N2O2     | DB00292 | Etomidate             | -3.386 | -3.397 |
| C16H24N2O      | DB00268 | Ropinirole            | -3.386 | -3.387 |
| C12H21N5O2S2   | DB00585 | Nizatidine            | -3.379 | -3.379 |
| C14H18N4O3     | DB00440 | Trimethoprim          | -3.377 | -4.32  |
| C17H19N3       | DB00370 | Mirtazapine           | -3.374 | -3.462 |
| C19H21N5O4     | DB00457 | Prazosin              | -3.372 | -4.614 |
| C19H27N5O4     | DB00346 | Alfuzosin             | -3.366 | -3.366 |
| C4H8N2O3       | DB00174 | Asparagine            | -3.359 | -3.359 |
| C2H5NO2        | DB00551 | Acetohydroxamic acid  | -3.357 | -3.36  |
| C20H24ClN3S    | DB00433 | Prochlorperazine      | -3.355 | -3.964 |
| C23H31NO7      | DB00688 | Mycophenolate mofetil | -3.352 | -5.107 |
| C12H15ClO3     | DB00636 | Clofibrate            | -3.35  | -3.35  |
| C17H13ClN4     | DB00404 | Alprazolam            | -3.35  | -3.352 |
| C14H15N3O5     | DB00494 | Entacapone            | -3.348 | -3.348 |
| C59H84N18O14   | DB00014 | Goserelin             | -3.348 | -3.975 |
| C22H23ClN2O2   | DB00455 | Loratadine            | -3.34  | -3.366 |
| C16H28N2O4     | DB00198 | Oseltamivir           | -3.34  | -4.552 |
| C25H27ClN2     | DB00737 | Meclizine             | -3.34  | -3.533 |
| C16H16ClN3O3S  | DB00808 | Indapamide            | -3.333 | -3.336 |
| C20H28N2O5S    | DB00706 | Tamsulosin            | -3.327 | -3.327 |
| C5H5N3O        | DB00339 | Pyrazinamide          | -3.325 | -3.325 |
| C8H9NO2        | DB00316 | Acetaminophen         | -3.32  | -3.321 |
| C21H16ClF3N4O3 | DB00398 | Sorafenib             | -3.32  | -3.332 |
| C6H13N3O3      | DB00155 | L-Citrulline          | -3.319 | -3.319 |
| C21H43N5O7     | DB00798 | Gentamicin            | -3.317 | -4.93  |
| C13H14N2O3     | DB00849 | Methylphenobarbital   | -3.315 | -4.491 |
| C14H12O2       | DB00676 | Benzyl benzoate       | -3.311 | -3.311 |
| C22H28O2       | DB00294 | Etonogestrel          | -3.301 | -3.301 |
| C19H21N5O4     | DB00457 | Prazosin              | -3.292 | -3.384 |
| C21H26O3       | DB00459 | Acitretin             | -3.291 | -3.294 |
| C20H23NO4      | DB00704 | Naltrexone            | -3.29  | -5.021 |
| C13H12F2N6O    | DB00196 | Fluconazole           | -3.289 | -3.289 |
| C4H6O4S2       | DB00566 | Succimer              | -3.288 | -3.288 |
| C7H15NO3       | DB00583 | Levocarnitine         | -3.287 | -3.287 |
| C29H31N7O      | DB00619 | Imatinib              | -3.286 | -3.493 |
| C10H8N6O       | DB00885 | Pemirolast            | -3.279 | -3.28  |
| C11H18N2O3     | DB00312 | Pentobarbital         | -3.279 | -3.314 |
| C19H24N2S      | DB00392 | Profenamine           | -3.277 | -3.279 |

|                |         |                     |        |        |
|----------------|---------|---------------------|--------|--------|
| C18H21NO3      | DB00318 | Codeine             | -3.277 | -4.821 |
| C6H14N2O2      | DB00123 | L-Lysine            | -3.268 | -3.268 |
| C17H23NO       | DB00854 | Levorphanol         | -3.263 | -3.268 |
| C8H8N2O3S      | DB00909 | Zonisamide          | -3.262 | -3.264 |
| C19H21N5O2     | DB00670 | Pirenzepine         | -3.258 | -3.899 |
| C15H23N3O4S    | DB00391 | Sulpiride           | -3.258 | -3.258 |
| C23H25F3N2OS   | DB00875 | Flupentixol         | -3.253 | -4.062 |
| C11H16N2O3     | DB00241 | Butalbital          | -3.244 | -3.299 |
| C6H10N6O       | DB00851 | Dacarbazine         | -3.244 | -3.277 |
| C22H25N3O7S    | DB00303 | Ertapenem           | -3.244 | -4.745 |
| C8H10N4O2      | DB00201 | Caffeine            | -3.241 | -3.241 |
| C20H22N8O5     | DB00563 | Methotrexate        | -3.232 | -4.668 |
| C11H10BrN5     | DB00484 | Brimonidine         | -3.229 | -3.278 |
| C21H41N5O7     | DB00955 | Netilmicin          | -3.228 | -3.866 |
| C6H14N4O2      | DB00125 | L-Arginine          | -3.226 | -3.226 |
| C5H4N4O        | DB00437 | Allopurinol         | -3.225 | -3.328 |
| C5H9N3         | DB00272 | Betazole            | -3.224 | -3.635 |
| C24H29N5O3     | DB00177 | Valsartan           | -3.223 | -3.223 |
| C15H11ClN2O2   | DB00842 | Oxazepam            | -3.22  | -3.22  |
| C13H17N5O8S2   | DB00355 | Aztreonam           | -3.216 | -3.216 |
| C21H21N        | DB00434 | Cyproheptadine      | -3.212 | -3.221 |
| C13H22N4O3S    | DB00863 | Ranitidine          | -3.21  | -3.662 |
| C6H9N3O2       | DB00117 | Histidine           | -3.203 | -3.659 |
| C19H27N3O5S2   | DB00204 | Dofetilide          | -3.202 | -4.75  |
| CH3O5P         | DB00529 | Foscarnet           | -3.201 | -3.207 |
| C17H19NO3      | DB00327 | Hydromorphone       | -3.198 | -4.936 |
| C5H12N2O2      | DB00129 | Ornithine           | -3.195 | -3.195 |
| C18H13Cl4N3O   | DB00239 | Oxiconazole         | -3.193 | -3.306 |
| C21H25ClN2O3   | DB00341 | Cetirizine          | -3.193 | -3.604 |
| C43H55N5O7     | DB00309 | Vindesine           | -3.192 | -3.382 |
| C9H8ClN5S      | DB00697 | Tizanidine          | -3.192 | -3.357 |
| C19H22ClN5O    | DB00656 | Trazodone           | -3.187 | -3.605 |
| C9H11Cl2N3O4S2 | DB00232 | Methyclothiazide    | -3.169 | -3.169 |
| C6H9N3O3       | DB00916 | Metronidazole       | -3.166 | -3.166 |
| C10H24N2O2     | DB00330 | Ethambutol          | -3.164 | -3.342 |
| C24H30N2O2     | DB00561 | Doxapram            | -3.163 | -3.511 |
| C17H20FN3O3    | DB00487 | Pefloxacin          | -3.152 | -5.611 |
| C13H6Cl6O2     | DB00756 | Hexachlorophene     | -3.148 | -5.67  |
| C10H7N3S       | DB00730 | Thiabendazole       | -3.147 | -3.147 |
| C19H17Cl3N2S   | DB00639 | Butoconazole        | -3.143 | -3.522 |
| C26H29N3O6     | DB00622 | Nicardipine         | -3.14  | -3.361 |
| C8H16O2        | DB00313 | Valproic Acid       | -3.138 | -3.14  |
| C23H32N6O4S    | DB00862 | Vardenafil          | -3.134 | -3.905 |
| C23H32N6O4S    | DB00862 | Vardenafil          | -3.131 | -3.81  |
| C16H14N2O3S    | DB00580 | Valdecocixib        | -3.122 | -3.122 |
| C5H9NO3        | DB00855 | Aminolevulinic acid | -3.12  | -3.819 |
| C11H16N4O4     | DB00380 | Dexrazoxane         | -3.113 | -4.041 |
| C2H7NS         | DB00847 | Cysteamine          | -3.113 | -3.136 |
| C32H26N4O2     | DB00872 | Conivaptan          | -3.111 | -3.888 |
| C21H31N5O2     | DB00490 | Buspirone           | -3.111 | -3.616 |
| C29H33ClN2O2   | DB00836 | Loperamide          | -3.111 | -3.14  |
| C18H26ClN3     | DB00608 | Chloroquine         | -3.109 | -3.145 |
| C12H16F3N      | DB00574 | Fenfluramine        | -3.107 | -3.107 |
| C9H11FN2O5     | DB00322 | Floxuridine         | -3.1   | -4.886 |
| C28H27NO4S     | DB00481 | Raloxifene          | -3.1   | -5.562 |
| C21H43N5O7     | DB00798 | Gentamicin          | -3.098 | -5.087 |
| C7H6ClN3O4S2   | DB00880 | Chlorothiazide      | -3.097 | -3.41  |
| C8H13N3O4S     | DB00911 | Tinidazole          | -3.096 | -3.096 |
| C11H16N4O4     | DB00380 | Dexrazoxane         | -3.095 | -4.673 |
| C15H10Cl2N2O2  | DB00186 | Lorazepam           | -3.093 | -3.093 |
| C19H19N3O5S    | DB00713 | Oxacillin           | -3.092 | -3.092 |
| C9H11NO2       | DB00120 | L-Phenylalanine     | -3.086 | -3.086 |
| C9H10N4O2S2    | DB00576 | Sulfamethizole      | -3.085 | -3.101 |

|               |         |                           |        |        |
|---------------|---------|---------------------------|--------|--------|
| C21H41N5O7    | DB00955 | Netilmicin                | -3.083 | -5.213 |
| C16H24N2O     | DB00935 | Oxymetazoline             | -3.08  | -3.08  |
| C18H13ClFN3   | DB00683 | Midazolam                 | -3.076 | -3.288 |
| C40H48I2N2O6  | DB00416 | Metocurine Iodide         | -3.069 | -3.069 |
| C7H11NO3      | DB00617 | Paramethadione            | -3.063 | -3.063 |
| C21H25NO      | DB00245 | Benzatropine              | -3.062 | -3.064 |
| C9H8ClN5S     | DB00697 | Tizanidine                | -3.057 | -3.894 |
| C20H23NS      | DB00340 | Metixene                  | -3.051 | -3.051 |
| C18H21NO3     | DB00956 | Hydrocodone               | -3.046 | -4.834 |
| C33H34N6O6    | DB00796 | Candesartan cilexetil     | -3.039 | -3.195 |
| C8H10N2O3S    | DB00634 | Sulfacetamide             | -3.037 | -3.055 |
| C26H31Cl2N5O3 | DB00251 | Terconazole               | -3.035 | -4.192 |
| CH5N3         | DB00536 | Guanidine                 | -3.035 | -3.035 |
| C18H25NO      | DB00514 | Dextromethorphan          | -3.03  | -3.034 |
| C16H15F2N3O4S | DB00213 | Pantoprazole              | -3.027 | -3.734 |
| C15H13NO3     | DB00465 | Ketorolac                 | -3.024 | -3.025 |
| C46H62N4O11   | DB00615 | Rifabutin                 | -3.019 | -3.228 |
| C51H79NO13    | DB00877 | Sirolimus                 | -3.016 | -3.018 |
| C14H20GdN3O10 | DB00789 | Gadopentetic acid         | -3.015 | -5.192 |
| C16H23NO2     | DB00473 | Hexylcaine                | -3.01  | -3.011 |
| C20H15F3N4O3  | DB00685 | Trovafloxacin             | -3.009 | -4.905 |
| C14H29NaO4S   | DB00464 | Sodium Tetradecyl Sulfate | -3.007 | -3.007 |
| C8H14O2S2     | DB00166 | Lipoic Acid               | -3.006 | -3.009 |
| C22H28N6O3S   | DB00705 | Delavirdine               | -3.006 | -3.876 |
| C8H12N2       | DB00780 | Phenelzine                | -3.003 | -3.358 |
| C16H28N2O4    | DB00198 | Oseltamivir               | -3     | -3.082 |
| C4H6O4        | DB00139 | Succinic acid             | -2.998 | -3.004 |
| C18H14N4O5S   | DB00795 | Sulfasalazine             | -2.998 | -3.761 |
| C10H15N5      | DB00914 | Phenformin                | -2.993 | -3.01  |
| C21H29N3O     | DB00280 | Disopyramide              | -2.991 | -2.996 |
| C3H7NO2S      | DB00151 | L-Cysteine                | -2.989 | -3.003 |
| C10H15N       | DB00191 | Phentermine               | -2.988 | -2.989 |
| C5H9Cl2N3O2   | DB00262 | Carmustine                | -2.986 | -2.986 |
| C19H25NO      | DB00504 | Levallorphan              | -2.979 | -4.815 |
| C17H12Cl2N4   | DB00897 | Triazolam                 | -2.976 | -2.977 |
| C18H22ClNO    | DB00925 | Phenoxybenzamine          | -2.97  | -3.344 |
| C20H22ClN3O   | DB00613 | Amodiaquine               | -2.97  | -3.564 |
| C16H16ClNO3   | DB00800 | Fenoldopam                | -2.97  | -4.958 |
| C22H17ClN2    | DB00257 | Clotrimazole              | -2.968 | -3.367 |
| C4H9NO3       | DB00156 | L-Threonine               | -2.962 | -2.962 |
| C18H13ClFN3   | DB00683 | Midazolam                 | -2.953 | -3.666 |
| C24H30N2O2    | DB00561 | Doxapram                  | -2.952 | -3.432 |
| C14H9ClF3NO2  | DB00625 | Efavirenz                 | -2.944 | -2.944 |
| C8H15N7O2S3   | DB00927 | Famotidine                | -2.935 | -4.234 |
| C22H28N2O2    | DB00913 | Anileridine               | -2.934 | -4.946 |
| C14H21N3O3S   | DB00839 | Tolazamide                | -2.914 | -2.938 |
| C22H29N3S2    | DB00372 | Thiethylperazine          | -2.91  | -3.519 |
| C26H28N2      | DB00568 | Cinnarizine               | -2.906 | -2.994 |
| C17H20FN3O3   | DB00487 | Pefloxacin                | -2.905 | -4.464 |
| C23H31NO7     | DB00688 | Mycophenolate mofetil     | -2.902 | -4.61  |
| C21H43N5O7    | DB00798 | Gentamicin                | -2.9   | -4.597 |
| C17H21NO4     | DB00907 | Cocaine                   | -2.9   | -2.957 |
| C5H5N5        | DB00173 | Adenine                   | -2.898 | -2.919 |
| C12H13ClN4    | DB00205 | Pyrimethamine             | -2.898 | -3.634 |
| C14H19NO2     | DB00422 | Methylphenidate           | -2.897 | -2.897 |
| C17H19N3O3S   | DB00736 | Esomeprazole              | -2.895 | -4.291 |
| C5H11NO4S     | DB00659 | Acamprosate               | -2.892 | -2.892 |
| C10H20N2S4    | DB00822 | Disulfiram                | -2.887 | -2.887 |
| C13H20N2O     | DB00750 | Prilocaine                | -2.887 | -4.257 |
| C10H13ClN2O3S | DB00672 | Chlorpropamide            | -2.885 | -2.892 |
| C7H4ClNO2     | DB00356 | Chlorzoxazone             | -2.883 | -2.916 |
| C6H5NO2       | DB00627 | Niacin                    | -2.881 | -2.89  |
| C6H9NO3       | DB00347 | Trimethadione             | -2.875 | -2.875 |

|                |         |                      |        |        |
|----------------|---------|----------------------|--------|--------|
| C19H23NO3      | DB00234 | Reboxetine           | -2.874 | -4.582 |
| C21H25N        | DB00857 | Terbinafine          | -2.869 | -2.991 |
| C12H24N2O4     | DB00395 | Carisoprodol         | -2.862 | -2.862 |
| C18H16O3       | DB00946 | Phenprocoumon        | -2.856 | -4.357 |
| C16H20N4O3S    | DB00214 | Torsemide            | -2.853 | -3.263 |
| C16H25NO4      | DB00187 | Esmolol              | -2.846 | -2.848 |
| C32H26N4O2     | DB00872 | Conivaptan           | -2.846 | -3.237 |
| C18H13Cl4N3O   | DB00239 | Oxiconazole          | -2.843 | -3.882 |
| C12H20N2O3S    | DB00489 | Sotalol              | -2.836 | -4.819 |
| C11H21N        | DB00657 | Mecamylamine         | -2.835 | -2.835 |
| C18H20N2S      | DB00902 | Methdilazine         | -2.827 | -2.827 |
| C21H21ClN2O8   | DB00618 | Demeclocycline       | -2.825 | -5.338 |
| C3H7NO3        | DB00133 | Serine               | -2.823 | -2.823 |
| C7H10N2O2S     | DB00389 | Carbimazole          | -2.82  | -2.82  |
| C12H13ClN4     | DB00205 | Pyrimethamine        | -2.82  | -3.606 |
| C13H11N3O4S2   | DB00469 | Tenoxicam            | -2.815 | -2.816 |
| C33H37N5O5     | DB00320 | Dihydroergotamine    | -2.814 | -4.54  |
| C4H3FN2O2      | DB00544 | Fluorouracil         | -2.814 | -3.014 |
| C18H21NO4      | DB00497 | Oxycodone            | -2.806 | -3.926 |
| C14H14ClNS     | DB00208 | Ticlopidine          | -2.802 | -2.976 |
| C21H23ClFN3O   | DB00690 | Flurazepam           | -2.802 | -2.814 |
| C23H29ClFN3O4  | DB00604 | Cisapride            | -2.798 | -2.887 |
| C5H11NO2S      | DB00859 | Penicillamine        | -2.794 | -2.808 |
| C15H14F3N3O4S2 | DB00436 | Bendroflumethiazide  | -2.792 | -2.859 |
| C21H41N5O7     | DB00955 | Netilmicin           | -2.791 | -5.241 |
| C28H28O3       | DB00210 | Adapalene            | -2.786 | -2.786 |
| C11H15NO       | DB00830 | Phenmetrazine        | -2.783 | -2.789 |
| C22H46O        | DB00632 | Docosanol            | -2.779 | -2.779 |
| C24H29NO3      | DB00843 | Donepezil            | -2.772 | -2.776 |
| C46H56N4O10    | DB00541 | Vincristine          | -2.768 | -3.862 |
| C17H21N        | DB00865 | Benzphetamine        | -2.757 | -2.797 |
| C6H6Cl6        | DB00431 | Lindane              | -2.745 | -2.745 |
| C21H19N3O3S    | DB00276 | Amsacrine            | -2.74  | -4.787 |
| C14H20GdN3O10  | DB00789 | Gadopentetic acid    | -2.739 | -4.578 |
| C14H12N6O      | DB00922 | Levosimendan         | -2.732 | -2.813 |
| C21H26ClN3OS   | DB00850 | Perphenazine         | -2.732 | -4.702 |
| C4H10N2        | DB00592 | Piperazine           | -2.727 | -2.741 |
| C5H9N3         | DB00272 | Betazole             | -2.727 | -3.137 |
| C6H13NO2       | DB00149 | L-Leucine            | -2.723 | -2.723 |
| C19H22N2       | DB00427 | Tripolidine          | -2.721 | -2.724 |
| C10H14N2       | DB00184 | Nicotine             | -2.718 | -2.743 |
| C14H14ClNS     | DB00208 | Ticlopidine          | -2.712 | -3.522 |
| C17H19N3O3S    | DB00736 | Esomeprazole         | -2.707 | -4.476 |
| C26H29NO       | DB00675 | Tamoxifen            | -2.706 | -4.719 |
| C17H17NO2      | DB00714 | Apomorphine          | -2.704 | -2.748 |
| C46H62N4O11    | DB00615 | Rifabutin            | -2.702 | -3.421 |
| C21H25ClN2O3   | DB00341 | Cetirizine           | -2.696 | -3.161 |
| C5H9NO4        | DB00142 | Glutamic Acid        | -2.693 | -2.693 |
| C13H14N2       | DB00382 | Tacrine              | -2.69  | -2.69  |
| C18H27NO2      | DB00645 | Dyclonine            | -2.689 | -2.695 |
| C17H20N2O2     | DB00809 | Tropicamide          | -2.686 | -5.244 |
| C6H8N2O8       | DB00883 | Isosorbide dinitrate | -2.683 | -2.683 |
| C4H9N3O2       | DB00148 | Creatine             | -2.683 | -2.683 |
| C5H14NO        | DB00122 | Choline              | -2.681 | -2.681 |
| C23H25N5O5     | DB00590 | Doxazosin            | -2.674 | -2.804 |
| C11H10BrN5     | DB00484 | Brimonidine          | -2.669 | -4.171 |
| C20H22N2       | DB00719 | Azatadine            | -2.666 | -2.671 |
| C8H17NO2       | DB00230 | Pregabalin           | -2.657 | -2.657 |
| C24H33N3O4     | DB00243 | Ranolazine           | -2.652 | -4.506 |
| C13H16N2       | DB00633 | Dexmedetomidine      | -2.651 | -3.438 |
| C22H25N3O4S    | DB00680 | Moricizine           | -2.649 | -2.839 |
| C7H9ClO        | DB00189 | Ethchlorvynol        | -2.646 | -2.646 |
| C21H27NO4      | DB00844 | Nalbuphine           | -2.646 | -5.206 |

|               |         |                       |        |        |
|---------------|---------|-----------------------|--------|--------|
| C8H8F3N3O4S2  | DB00774 | Hydroflumethiazide    | -2.645 | -2.691 |
| C4H6N4O3S2    | DB00819 | Acetazolamide         | -2.639 | -2.894 |
| C24H28O2      | DB00307 | Bexarotene            | -2.637 | -2.638 |
| C11H12N4O3S   | DB00664 | Sulfametopyrazine     | -2.632 | -3.668 |
| C9H15N5O3     | DB00360 | Sapropterin           | -2.632 | -4.95  |
| C31H33F3N2O5S | DB00932 | Tipranavir            | -2.628 | -3.56  |
| C11H11N3O2S   | DB00891 | Sulfapyridine         | -2.625 | -2.783 |
| C25H30N3      | DB00406 | Gentian violet cation | -2.622 | -2.635 |
| C17H19N3      | DB00370 | Mirtazapine           | -2.615 | -3.877 |
| C17H21NO4     | DB00907 | Cocaine               | -2.614 | -4.033 |
| C28H31FN4O    | DB00637 | Astemizole            | -2.612 | -3.126 |
| C22H25N3O4S   | DB00680 | Moricizine            | -2.612 | -4.152 |
| C21H21N       | DB00735 | Naftifine             | -2.609 | -3.839 |
| C17H21NO3     | DB00674 | Galantamine           | -2.605 | -4.721 |
| C22H19N3O4    | DB00820 | Tadalafil             | -2.603 | -2.603 |
| C19H23NO3     | DB00234 | Reboxetine            | -2.602 | -2.636 |
| C11H12N2S     | DB00848 | Levamisole            | -2.6   | -2.682 |
| C19H19NOS     | DB00920 | Ketotifen             | -2.59  | -2.598 |
| C22H30N6O4S   | DB00203 | Sildenafil            | -2.588 | -3.407 |
| C9H11N2O5     | DB00249 | Idoxuridine           | -2.586 | -4.795 |
| C5H9NO3       | DB00855 | Aminolevulinic acid   | -2.585 | -2.803 |
| C20H23NO4     | DB00704 | Naltrexone            | -2.584 | -4.799 |
| C10H21N3O     | DB00711 | Diethylcarbamazine    | -2.578 | -3.054 |
| C3H7O4P       | DB00828 | Fosfomycin            | -2.578 | -2.831 |
| C52H98N16O13  | DB00803 | Colistin              | -2.56  | -5.012 |
| C21H24F3N3S   | DB00831 | Trifluoperazine       | -2.558 | -3.167 |
| C26H31Cl2N5O3 | DB00251 | Terconazole           | -2.557 | -3.52  |
| C23H25F3N2OS  | DB00875 | Flupentixol           | -2.554 | -4.075 |
| C20H12O5      | DB00693 | Fluorescein           | -2.54  | -3.251 |
| C3H7O4P       | DB00828 | Fosfomycin            | -2.538 | -3.163 |
| C13H16N2      | DB00633 | Dexmedetomidine       | -2.525 | -3.014 |
| C21H21NO2S    | DB00799 | Tazarotene            | -2.523 | -2.523 |
| C45H54N4O8    | DB00361 | Vinorelbine           | -2.516 | -2.657 |
| C21H24FN3O4   | DB00218 | Moxifloxacin          | -2.513 | -2.614 |
| C19H22ClN5O   | DB00656 | Trazodone             | -2.507 | -2.91  |
| C8H11NO3      | DB00165 | Pyridoxine            | -2.501 | -2.725 |
| C21H32N6O3    | DB00802 | Alfentanil            | -2.487 | -2.554 |
| C18H14N4O5S   | DB00795 | Sulfasalazine         | -2.482 | -2.771 |
| C16H15N3      | DB00751 | Epinastine            | -2.48  | -4.124 |
| C18H28N2O     | DB00297 | Bupivacaine           | -2.471 | -3.912 |
| C11H16N4O4    | DB00552 | Pentostatin           | -2.468 | -4.202 |
| C7H6ClN3O4S2  | DB00880 | Chlorothiazide        | -2.467 | -3.001 |
| C29H35NO2     | DB00834 | Mifepristone          | -2.465 | -2.48  |
| C29H38N4O10   | DB00256 | Lymecycline           | -2.459 | -3.588 |
| C5H9NO2       | DB00172 | Proline               | -2.456 | -2.456 |
| C10H16N2O3    | DB00237 | Butabarbital          | -2.456 | -4.136 |
| C13H12O2      | DB00600 | Monobenzone           | -2.454 | -2.455 |
| C14H12N6O     | DB00922 | Levosimendan          | -2.453 | -3.673 |
| C7H10N2OS     | DB00550 | Propylthiouracil      | -2.451 | -4.12  |
| C5H11NO2      | DB00161 | L-Valine              | -2.45  | -2.45  |
| C13H19NO      | DB00937 | Diethylpropion        | -2.444 | -2.589 |
| C6H8N2O2S     | DB00259 | Sulfanilamide         | -2.443 | -2.443 |
| C17H22N4O     | DB00805 | Minaprine             | -2.44  | -3.624 |
| C22H22FN3O2   | DB00450 | Droperidol            | -2.43  | -3.542 |
| C8H12N2       | DB00780 | Phenelzine            | -2.423 | -3.43  |
| C6H15N2O2     | DB00411 | Carbamoylcholine      | -2.417 | -2.417 |
| C46H56N4O10   | DB00541 | Vincristine           | -2.416 | -2.741 |
| C22H24N2O9    | DB00595 | Oxytetracycline       | -2.413 | -2.684 |
| C21H29NO2     | DB00611 | Butorphanol           | -2.413 | -4.792 |
| C19H16O4      | DB00682 | Warfarin              | -2.412 | -4.41  |
| C10H15N3      | DB00217 | Bethanidine           | -2.398 | -2.398 |
| C38H72N2O12   | DB00207 | Azithromycin          | -2.398 | -5.043 |
| C10H12N4O3    | DB00900 | Didanosine            | -2.397 | -3.605 |

|               |         |                        |        |        |
|---------------|---------|------------------------|--------|--------|
| C21H25N       | DB00857 | Terbinafine            | -2.389 | -3.389 |
| C12H21N       | DB00478 | Rimantadine            | -2.387 | -2.387 |
| C9H13NO3      | DB00668 | Epinephrine            | -2.361 | -4.706 |
| C9H11F2N3O4   | DB00441 | Gemcitabine            | -2.355 | -5.076 |
| C20H24N2O2    | DB00468 | Quinine                | -2.353 | -4.63  |
| C13H19NO      | DB00937 | Diethylpropion         | -2.348 | -3.255 |
| C12H17N4OS    | DB00152 | Thiamine               | -2.332 | -4.382 |
| C3H6N2O2      | DB00260 | Cycloserine            | -2.329 | -2.576 |
| C46H56N4O10   | DB00541 | Vincristine            | -2.327 | -3.259 |
| C4H7NO4       | DB00128 | Aspartic acid          | -2.325 | -2.325 |
| C10H17NOS     | DB00185 | Cevimeline             | -2.321 | -2.323 |
| C23H27FN4O2   | DB00734 | Risperidone            | -2.318 | -2.328 |
| C3H6N2O2      | DB00260 | Cycloserine            | -2.317 | -2.955 |
| C22H24N2O8    | DB00759 | Tetracycline           | -2.313 | -2.451 |
| C19H21N5O2    | DB00670 | Pirenzepine            | -2.297 | -4.168 |
| C17H21NO3     | DB00867 | Ritodrine              | -2.295 | -4.603 |
| C19H27N5      | DB00298 | Dapiprazole            | -2.295 | -2.595 |
| C10H10N4O2S   | DB00359 | Sulfadiazine           | -2.293 | -3.162 |
| C18H22CINO    | DB00925 | Phenoxybenzamine       | -2.292 | -2.741 |
| C4H6N2S       | DB00763 | Methimazole            | -2.273 | -2.273 |
| C17H29GdN4O7  | DB00597 | Gadoteridol            | -2.273 | -2.304 |
| C12H15N3O2S   | DB00518 | Albendazole            | -2.272 | -3.686 |
| C19H20N2O3    | DB00757 | Dolasetron             | -2.272 | -3.191 |
| C10H17N3O6S   | DB00143 | Glutathione            | -2.27  | -4.973 |
| C3H2CIF5O     | DB00753 | Isoflurane             | -2.27  | -2.27  |
| C32H45N3O4S   | DB00220 | Nelfinavir             | -2.268 | -4.5   |
| C11H16N2O3    | DB00306 | Talbutal               | -2.264 | -3.704 |
| C23H29CIFN3O4 | DB00604 | Cisapride              | -2.261 | -3.426 |
| C13H24NO10P   | DB00144 | Phosphatidyl serine    | -2.258 | -4.542 |
| C12H25NaO4S   | DB00815 | Sodium lauryl sulfate  | -2.258 | -2.258 |
| C19H27NO      | DB00652 | Pentazocine            | -2.257 | -4.596 |
| MgO4S         | DB00653 | Magnesium sulfate      | -2.256 | -2.256 |
| C33H37N5O5    | DB00320 | Dihydroergotamine      | -2.256 | -4.442 |
| C30H60I3N3O3  | DB00483 | Gallamine Triethiodide | -2.251 | -2.251 |
| C13H20N2O2    | DB00721 | Procaine               | -2.239 | -2.26  |
| C9H11N        | DB00752 | Tranlycypromine        | -2.227 | -2.255 |
| C14H20GdN3O10 | DB00789 | Gadopentetic acid      | -2.22  | -3.036 |
| C5H8N4O3S2    | DB00703 | Methazolamide          | -2.219 | -2.454 |
| C17H26N2O     | DB00296 | Ropivacaine            | -2.217 | -3.657 |
| C14H21N3O3S   | DB00839 | Tolazamide             | -2.214 | -4.134 |
| C20H24N2O2    | DB00908 | Quinidine              | -2.2   | -4.477 |
| C33H40N2O9    | DB00206 | Reserpine              | -2.194 | -2.23  |
| C9H9Cl2N3     | DB00575 | Clonidine              | -2.194 | -4.126 |
| C19H27N5      | DB00298 | Dapiprazole            | -2.191 | -3.251 |
| C18H26ClN3    | DB00608 | Chloroquine            | -2.188 | -3.864 |
| C4H3FN2O2     | DB00544 | Fluorouracil           | -2.171 | -2.913 |
| C20H22N8O5    | DB00563 | Methotrexate           | -2.161 | -4.622 |
| C10H21N3O     | DB00711 | Diethylcarbamazine     | -2.156 | -2.508 |
| C9H7Cl2N5     | DB00555 | Lamotrigine            | -2.155 | -3.975 |
| C28H33ClN2    | DB00354 | Buclizine              | -2.148 | -2.963 |
| C8H11Cl2N3O2  | DB00791 | Uracil mustard         | -2.138 | -4.07  |
| C6H13NO2      | DB00167 | Isoleucine             | -2.137 | -2.137 |
| C22H26F3N3OS  | DB00623 | Fluphenazine           | -2.133 | -4.103 |
| C16H13N3O3    | DB00643 | Mebendazole            | -2.132 | -2.791 |
| C52H88N10O15  | DB00520 | Casprofungin           | -2.126 | -4.718 |
| C22H26N2O4S   | DB00343 | Diltiazem              | -2.125 | -4.221 |
| C10H16N6S     | DB00501 | Cimetidine             | -2.115 | -2.668 |
| C17H19N3O3S   | DB00338 | Omeprazole             | -2.114 | -3.825 |
| C4H6CaO4      | DB00258 | Calcium acetate        | -2.113 | -2.116 |
| C11H18N2O3    | DB00312 | Pentobarbital          | -2.109 | -3.797 |
| C14H11NO5     | DB00323 | Tolcapone              | -2.107 | -4.662 |
| C19H27N5      | DB00298 | Dapiprazole            | -2.095 | -2.966 |
| C12H9N3O5S    | DB00507 | Nitazoxanide           | -2.092 | -4.276 |

|                |         |                      |        |        |
|----------------|---------|----------------------|--------|--------|
| C32H53N2O4     | DB00728 | Rocuronium           | -2.092 | -2.239 |
| C5H11NO2S      | DB00134 | Methionine           | -2.088 | -2.088 |
| C9H18N6        | DB00488 | Altretamine          | -2.086 | -2.134 |
| C16H15N3       | DB00751 | Epinastine           | -2.082 | -2.12  |
| C33H35N5O5     | DB00696 | Ergotamine           | -2.079 | -4.418 |
| C18H30O2       | DB00132 | Alpha-Linolenic Acid | -2.051 | -2.055 |
| C19H24N2O3     | DB00598 | Labetalol            | -2.033 | -3.97  |
| C10H16N6S      | DB00501 | Cimetidine           | -2.029 | -2.711 |
| C13H22N4O3S    | DB00863 | Ranitidine           | -2.002 | -4.034 |
| C66H75Cl2N9O24 | DB00512 | Vancomycin           | -2.002 | -4.285 |
| C17H28N2O3     | DB00892 | Oxybuprocaine        | -1.991 | -3.977 |
| C19H20N2O2     | DB00812 | Phenylbutazone       | -1.991 | -4.589 |
| C22H24N2O8     | DB00759 | Tetracycline         | -1.98  | -4.31  |
| C17H20N4S      | DB00334 | Olanzapine           | -1.977 | -3.635 |
| C32H53N2O4     | DB00728 | Rocuronium           | -1.974 | -2.872 |
| C11H17NO3      | DB00816 | Orciprenaline        | -1.969 | -4.18  |
| C10H12N2       | DB00797 | Tolazoline           | -1.967 | -1.968 |
| C24H34N4O5S    | DB00222 | Glimepiride          | -1.961 | -1.985 |
| C22H29N3S2     | DB00372 | Thiethylperazine     | -1.96  | -4.304 |
| C8H10N4O2      | DB00824 | Enprofylline         | -1.958 | -3.432 |
| C19H20N2O3     | DB00757 | Dolasetron           | -1.958 | -2.099 |
| C22H22N2O8     | DB00931 | Metacycline          | -1.948 | -2.243 |
| C12H15N3O2S    | DB00518 | Albendazole          | -1.946 | -3.832 |
| C25H27ClN2     | DB00737 | Meclizine            | -1.92  | -2.735 |
| C26H28ClNO     | DB00539 | Toremifene           | -1.917 | -3.93  |
| C17H19NO3      | DB00327 | Hydromorphone        | -1.911 | -4.014 |
| C11H12N2O2S    | DB00744 | Zileuton             | -1.909 | -3.97  |
| C3H2ClF5O      | DB00228 | Enflurane            | -1.905 | -1.905 |
| C26H34FNO5     | DB00439 | Cerivastatin         | -1.903 | -3.84  |
| C3H4O3         | DB00119 | Pyruvic acid         | -1.899 | -1.899 |
| C19H29NO5      | DB00449 | Dipivefrin           | -1.889 | -4.551 |
| C20H34GdN5O10  | DB00538 | Gadoversetamide      | -1.888 | -1.988 |
| C45H54N4O8     | DB00361 | Vinorelbine          | -1.883 | -3.182 |
| C3H5N3O9       | DB00727 | Nitroglycerin        | -1.882 | -1.882 |
| C5H4N4O        | DB00437 | Allopurinol          | -1.876 | -3.055 |
| C23H46N6O13    | DB00452 | Framycetin           | -1.87  | -2.556 |
| C37H67NO13     | DB00199 | Erythromycin         | -1.864 | -4.508 |
| C5H11Cl2N      | DB00888 | Mechlorethamine      | -1.858 | -1.923 |
| C21H31N3O5     | DB00722 | Lisinopril           | -1.854 | -1.976 |
| C22H28N2O      | DB00813 | Fentanyl             | -1.85  | -3.958 |
| C10H10N4O2S    | DB00359 | Sulfadiazine         | -1.847 | -2.002 |
| C24H26N6O3     | DB00275 | Olmesartan           | -1.843 | -1.941 |
| C20H24ClN3S    | DB00433 | Prochlorperazine     | -1.843 | -4.186 |
| C15H17FN4O3    | DB00467 | Enoxacin             | -1.838 | -4.473 |
| C18H19ClN4     | DB00363 | Clozapine            | -1.836 | -3.705 |
| C6H12N2O4S2    | DB00138 | Cystine              | -1.835 | -3.63  |
| C10H16N6S      | DB00501 | Cimetidine           | -1.83  | -2.614 |
| C11H11N3O2S    | DB00891 | Sulfapyridine        | -1.828 | -2.866 |
| C26H37N5O2     | DB00248 | Cabergoline          | -1.825 | -2.058 |
| C4H11N5        | DB00331 | Metformin            | -1.822 | -1.825 |
| C8H12N2        | DB00780 | Phenelzine           | -1.821 | -2.601 |
| C8H10NO6P      | DB00114 | Pyridoxal phosphate  | -1.818 | -4.317 |
| C16H15F2N3O4S  | DB00213 | Pantoprazole         | -1.818 | -3.903 |
| C6H9N3O2       | DB00117 | Histidine            | -1.814 | -3.534 |
| C14H30N2O4     | DB00202 | Succinylcholine      | -1.809 | -1.809 |
| C41H76N2O15    | DB00778 | Roxithromycin        | -1.808 | -4.447 |
| C23H32N6O4S    | DB00862 | Vardenafil           | -1.807 | -3.565 |
| C15H21NO2      | DB00454 | Meperidine           | -1.803 | -3.996 |
| C21H23ClFN3O   | DB00690 | Flurazepam           | -1.803 | -4.1   |
| C5H8N4O3S2     | DB00703 | Methazolamide        | -1.8   | -3.01  |
| C21H43N5O7     | DB00798 | Gentamicin           | -1.791 | -3.301 |
| C16H26N2O3     | DB00807 | Proparacaine         | -1.79  | -1.809 |
| C72H95ClN14O14 | DB00106 | Abarelix             | -1.781 | -1.785 |

|                |         |                     |        |        |
|----------------|---------|---------------------|--------|--------|
| C16H14ClN3O    | DB00475 | Chlordiazepoxide    | -1.766 | -3.342 |
| C8H11NO3       | DB00368 | Norepinephrine      | -1.742 | -3.837 |
| C18H18ClN3O    | DB00408 | Loxapine            | -1.741 | -3.488 |
| C11H12N2S      | DB00848 | Levamisole          | -1.74  | -2.952 |
| C22H25N3O4S    | DB00680 | Moricizine          | -1.736 | -2.893 |
| C52H98N16O13   | DB00803 | Colistin            | -1.736 | -3.955 |
| C46H56N4O10    | DB00541 | Vincristine         | -1.733 | -3.435 |
| C9H13NO2       | DB00610 | Metaraminol         | -1.713 | -4.122 |
| C6H10N6O       | DB00851 | Dacarbazine         | -1.709 | -3.455 |
| C22H28GdN3O11  | DB00743 | Gadobenidic acid    | -1.701 | -3.155 |
| C23H24N2O4S    | DB00876 | Eprosartan          | -1.698 | -3.433 |
| C20H28N2O5     | DB00899 | Remifentanyl        | -1.697 | -1.983 |
| C26H28ClNO     | DB00882 | Clomifene           | -1.692 | -3.705 |
| C17H21N        | DB00865 | Benzphetamine       | -1.689 | -3.302 |
| C20H15F3N4O3   | DB00685 | Trovafloxacin       | -1.68  | -3.719 |
| C3H7NO2        | DB00160 | L-Alanine           | -1.679 | -1.679 |
| C11H11N3O2S    | DB00891 | Sulfapyridine       | -1.679 | -3.347 |
| C9H16O4        | DB00548 | Azelaic acid        | -1.654 | -1.661 |
| C21H41N5O7     | DB00955 | Netilmicin          | -1.649 | -4.058 |
| C15H14F3N3O4S2 | DB00436 | Bendroflumethiazide | -1.632 | -3.005 |
| C7H9N2O        | DB00733 | Pralidoxime         | -1.629 | -1.854 |
| C19H35NO2      | DB00804 | Dicyclomine         | -1.616 | -3.735 |
| C16H26N2O3     | DB00807 | Proparacaine        | -1.613 | -3.652 |
| C12H9N3O       | DB00235 | Milrinone           | -1.593 | -3.658 |
| C27H36N2O4     | DB00912 | Repaglinide         | -1.585 | -4.123 |
| C14H16ClN3O4S2 | DB00606 | Cyclothiazide       | -1.58  | -3.884 |
| C21H24F3N3S    | DB00831 | Trifluoperazine     | -1.563 | -3.906 |
| C13H20N2O2     | DB00721 | Procaine            | -1.562 | -3.549 |
| C5H8N4O3S2     | DB00703 | Methazolamide       | -1.56  | -3.01  |
| C14H22N2O      | DB00281 | Lidocaine           | -1.545 | -3.545 |
| C32H52N4O4     | DB00944 | Demecarium          | -1.539 | -1.539 |
| C16H13ClN2O    | DB00579 | Mazindol            | -1.529 | -4.144 |
| C21H23ClFNO2   | DB00502 | Haloperidol         | -1.528 | -3.779 |
| C9H13NO        | DB00397 | Phenylpropanolamine | -1.513 | -3.923 |
| C4H6N4O3S2     | DB00819 | Acetazolamide       | -1.494 | -2.913 |
| C24H33N3O4     | DB00243 | Ranolazine          | -1.484 | -1.515 |
| C19H17NOS      | DB00525 | Tolnaftate          | -1.478 | -1.478 |
| C36H41N3O6     | DB00528 | Lercanidipine       | -1.477 | -3.265 |
| C20H22ClN3O    | DB00613 | Amodiaquine         | -1.471 | -4.035 |
| C10H15N5       | DB00914 | Phenformin          | -1.461 | -3.997 |
| C10H24N2O2     | DB00330 | Ethambutol          | -1.458 | -2.258 |
| C10H14N2       | DB00184 | Nicotine            | -1.45  | -3.358 |
| C17H29GdN4O7   | DB00597 | Gadoteridol         | -1.441 | -3.926 |
| C47H75NO17     | DB00646 | Nystatin            | -1.431 | -3.189 |
| C66H83N17O13   | DB00666 | Nafarelin           | -1.406 | -2.232 |
| C23H32N6O4S    | DB00862 | Vardenafil          | -1.401 | -3.066 |
| C24H28N2O5     | DB00542 | Benazepril          | -1.393 | -1.864 |
| C27H22Cl2N4    | DB00845 | Clofazimine         | -1.37  | -1.372 |
| C7H8N4O2       | DB00277 | Theophylline        | -1.363 | -3.196 |
| C2H5NO2        | DB00145 | Glycine             | -1.363 | -1.363 |
| C11H17NO3      | DB00723 | Methoxamine         | -1.361 | -3.77  |
| C52H98N16O13   | DB00803 | Colistin            | -1.35  | -3.758 |
| C21H25ClN2O3   | DB00341 | Cetirizine          | -1.349 | -3.208 |
| C10H11F3N2O5   | DB00432 | Trifluridine        | -1.341 | -2.535 |
| C9H11N         | DB00752 | Tranlycypromine     | -1.338 | -3.147 |
| C14H20GdN3O10  | DB00789 | Gadopentetic acid   | -1.338 | -1.576 |
| C8H11NO3       | DB00165 | Pyridoxine          | -1.337 | -3.991 |
| C2H6O          | DB00898 | Ethanol             | -1.328 | -1.328 |
| C17H16ClN3O    | DB00543 | Amoxapine           | -1.326 | -3.576 |
| C33H40N2O9     | DB00206 | Reserpine           | -1.317 | -2.991 |
| C5H8N4O3S2     | DB00703 | Methazolamide       | -1.315 | -2.63  |
| C9H9Cl2N3      | DB00575 | Clonidine           | -1.304 | -1.327 |
| C16H16ClNO2S   | DB00758 | Clopidogrel         | -1.297 | -3.245 |



|                |         |                       |        |        |
|----------------|---------|-----------------------|--------|--------|
| C29H31N7O      | DB00619 | Imatinib              | -1.281 | -3.784 |
| C6H12CINO      | DB00658 | Sevelamer             | -1.277 | -1.279 |
| C20H36N2O3S    | DB00308 | Ibutilide             | -1.268 | -3.63  |
| C4H6N4O3S2     | DB00819 | Acetazolamide         | -1.254 | -2.599 |
| C22H22N2O8     | DB00931 | Metacycline           | -1.25  | -3.516 |
| C18H21NO3      | DB00956 | Hydrocodone           | -1.241 | -1.271 |
| C10H15NO       | DB00852 | Pseudoephedrine       | -1.211 | -3.873 |
| C22H24N2O9     | DB00595 | Oxytetracycline       | -1.199 | -3.515 |
| C11H18N2O2S    | DB00599 | Thiopental            | -1.183 | -3.444 |
| C5H5N5S        | DB00352 | Tioguanine            | -1.17  | -3.345 |
| C4H6N4O3S2     | DB00819 | Acetazolamide         | -1.167 | -2.389 |
| C26H28N2       | DB00568 | Cinnarizine           | -1.164 | -2.384 |
| C12H21NO8S     | DB00273 | Topiramate            | -1.154 | -3.576 |
| C15H18N4O5     | DB00305 | Mitomycin             | -1.152 | -3.29  |
| C22H28GdN3O11  | DB00743 | Gadobenic acid        | -1.143 | -2.747 |
| C8H6N4O5       | DB00698 | Nitrofurantoin        | -1.122 | -2.403 |
| C7H4ClNO2      | DB00356 | Chlorzoxazone         | -1.11  | -2.832 |
| C10H16N6S      | DB00501 | Cimetidine            | -1.109 | -3.615 |
| C22H28GdN3O11  | DB00743 | Gadobenic acid        | -1.101 | -2.523 |
| C31H33N3O6S    | DB00549 | Zafirlukast           | -1.094 | -3.755 |
| C4H6N4O3S2     | DB00819 | Acetazolamide         | -1.067 | -3.205 |
| C66H75Cl2N9O24 | DB00512 | Vancomycin            | -1.056 | -2.031 |
| C7H9N2O        | DB00733 | Pralidoxime           | -1.043 | -1.725 |
| C19H21N5O4     | DB00457 | Prazosin              | -1.035 | -3.336 |
| C36H47N5O4     | DB00224 | Indinavir             | -1.034 | -1.425 |
| C18H27NO2      | DB00645 | Dyclonine             | -1.025 | -3.731 |
| C23H46N6O13    | DB00452 | Framycetin            | -1.023 | -2.848 |
| C5H5N5         | DB00173 | Adenine               | -1.022 | -3.019 |
| C14H16N2O2     | DB00292 | Etomidate             | -1.012 | -3.393 |
| C20H25N3O2     | DB00353 | Methylethylmetrine    | -1.011 | -1.639 |
| C12H19NO3      | DB00871 | Terbutaline           | -1.011 | -3.226 |
| C8H8F3N3O4S2   | DB00774 | Hydroflumethiazide    | -0.996 | -2.606 |
| C66H75Cl2N9O24 | DB00512 | Vancomycin            | -0.988 | -3.608 |
| C9H13N2O2      | DB00545 | Pyridostigmine        | -0.985 | -0.985 |
| C10H17N        | DB00915 | Amantadine            | -0.98  | -0.98  |
| C10H16N2O4S3   | DB00869 | Dorzolamide           | -0.974 | -1.038 |
| C18H37N5O9     | DB00684 | Tobramycin            | -0.97  | -2.554 |
| C19H27N3O5S2   | DB00204 | Dofetilide            | -0.965 | -3.007 |
| C29H39N5O8     | DB00560 | Tigecycline           | -0.955 | -3.606 |
| C19H19NOS      | DB00920 | Ketotifen             | -0.952 | -3.527 |
| C21H16ClF3N4O3 | DB00398 | Sorafenib             | -0.933 | -3.246 |
| C14H13N3O4S2   | DB00814 | Meloxicam             | -0.913 | -3.082 |
| C10H16N2O4S3   | DB00869 | Dorzolamide           | -0.911 | -2.323 |
| C22H30N2O2S    | DB00708 | Sufentanil            | -0.909 | -0.948 |
| C40H56O2       | DB00137 | Lutein                | -0.909 | -0.909 |
| C21H41N5O7     | DB00955 | Netilmicin            | -0.903 | -2.825 |
| C20H34GdN5O10  | DB00538 | Gadoversetamide       | -0.877 | -3.574 |
| C16H14F3N3O2S  | DB00448 | Lansoprazole          | -0.865 | -2.898 |
| C3H7NO2S       | DB00151 | L-Cysteine            | -0.845 | -3.064 |
| C20H28N2O5     | DB00899 | Remifentanyl          | -0.81  | -1.378 |
| C23H27FN4O2    | DB00734 | Risperidone           | -0.787 | -3.209 |
| C46H58N4O9     | DB00570 | Vinblastine           | -0.782 | -2.807 |
| C8H10N4O2      | DB00824 | Enprofylline          | -0.772 | -3.422 |
| C25H27ClN2     | DB00737 | Meclizine             | -0.771 | -2.934 |
| C24H34N4O5S    | DB00222 | Glimepiride           | -0.771 | -2.694 |
| C8H10N2O3S     | DB00634 | Sulfacetamide         | -0.768 | -2.86  |
| C25H30N3       | DB00406 | Gentian violet cation | -0.747 | -3.027 |
| C9H10N4O2S2    | DB00576 | Sulfamethizole        | -0.73  | -2.852 |
| C5H11Cl2N      | DB00888 | Mechlorethamine       | -0.709 | -2.054 |
| C9H13NO2       | DB00388 | Phenylephrine         | -0.706 | -3.367 |
| C23H32N6O4S    | DB00862 | Vardenafil            | -0.692 | -3.408 |
| C23H32N6O4S    | DB00862 | Vardenafil            | -0.691 | -1.555 |
| C28H33ClN2     | DB00354 | Buclizine             | -0.674 | -2.836 |

|                |         |                       |        |        |
|----------------|---------|-----------------------|--------|--------|
| C16H20N4O3S    | DB00214 | Torase mide           | -0.671 | -3.295 |
| C36H41N3O6     | DB00528 | Lercanidipine         | -0.642 | -0.672 |
| C20H34GdN5O10  | DB00538 | Gadoversetamide       | -0.636 | -2.862 |
| C29H33CIN2O2   | DB00836 | Loperamide            | -0.6   | -2.39  |
| C25H30N2O5     | DB00881 | Quinapril             | -0.592 | -1.466 |
| C15H13N3O4S    | DB00554 | Piroxicam             | -0.587 | -0.592 |
| C5H11NO2S      | DB00859 | Penicillamine         | -0.578 | -2.797 |
| C29H35NO2      | DB00834 | Mifepristone          | -0.544 | -2.698 |
| C22H22N2O8     | DB00931 | Metacycline           | -0.518 | -2.852 |
| C4H6O4         | DB00139 | Succinic acid         | -0.516 | -3.185 |
| C2H7NS         | DB00847 | Cysteamine            | -0.515 | -3.133 |
| C45H54N4O8     | DB00361 | Vinorelbine           | -0.494 | -3.086 |
| C5H4N4O        | DB00437 | Allopurinol           | -0.487 | -2.928 |
| C41H42N4O8     | DB00460 | Verteporfin           | -0.466 | -0.466 |
| C9H18N6        | DB00488 | Altretamine           | -0.463 | -1.968 |
| C21H32N6O3     | DB00802 | Alfentanil            | -0.423 | -1.743 |
| C10H13CIN2O3S  | DB00672 | Chlorpropamide        | -0.415 | -3.051 |
| C21H21CIN2O8   | DB00618 | Demeclocycline        | -0.379 | -1.912 |
| C26H28N2       | DB00568 | Cinnarizine           | -0.358 | -3.018 |
| C4H10N2        | DB00592 | Piperazine            | -0.355 | -2.701 |
| C3F8           | DB00556 | Perflutren            | -0.35  | -0.35  |
| C16H15F2N3O4S  | DB00213 | Pantoprazole          | -0.342 | -2.034 |
| C21H31N5O2     | DB00490 | Buspirone             | -0.33  | -0.66  |
| C11H15NO       | DB00830 | Phenmetrazine         | -0.326 | -3.053 |
| C22H30N2O2S    | DB00708 | Sufentanil            | -0.301 | -1.935 |
| C28H30N2O2     | DB00496 | Darifenacin           | -0.296 | -0.298 |
| C21H21CIN2O8   | DB00618 | Demeclocycline        | -0.258 | -2.662 |
| C27H34N2O7     | DB00691 | Moexipril             | -0.245 | -1.119 |
| C21H21N        | DB00434 | Cyproheptadine        | -0.226 | -2.701 |
| C28H33CIN2     | DB00354 | Buclizine             | -0.224 | -0.417 |
| C6H5NO2        | DB00627 | Niacin                | -0.216 | -2.664 |
| C9H16O4        | DB00548 | Azelaic acid          | -0.112 | -2.71  |
| C38H72N2O12    | DB00207 | Azithromycin          | -0.09  | -0.103 |
| C17H19N3       | DB00370 | Mirtazapine           | 0.044  | -2.431 |
| C23H25N5O5     | DB00590 | Doxazosin             | 0.053  | -2.163 |
| C33H35N5O5     | DB00696 | Ergotamine            | 0.081  | -0.784 |
| C22H24N2O8     | DB00254 | Doxycycline           | 0.087  | -2.435 |
| C17H17CIN6O3   | DB00402 | Eszopiclone           | 0.107  | -0.244 |
| C41H76N2O15    | DB00778 | Roxithromycin         | 0.152  | 0.145  |
| C22H25N3O4S    | DB00680 | Moricizine            | 0.173  | -1.517 |
| C17H29GdN4O7   | DB00597 | Gadoteridol           | 0.226  | -1.881 |
| C22H24N2O8     | DB00759 | Tetracycline          | 0.236  | -2.164 |
| CH3O5P         | DB00529 | Foscarnet             | 0.238  | -2.449 |
| C2H7NS         | DB00847 | Cysteamine            | 0.25   | -1.933 |
| C22H24N2O9     | DB00595 | Oxytetracycline       | 0.251  | -2.127 |
| C28H31FN4O     | DB00637 | Astemizole            | 0.274  | -0.052 |
| C15H12N2O2     | DB00252 | Phenytoin             | 0.346  | -1.175 |
| C12H18N2O3     | DB00418 | Secobarbital          | 0.432  | -1.072 |
| C33H34N6O6     | DB00796 | Candesartan cilexetil | 0.614  | -0.252 |
| C11H16N2O3     | DB00241 | Butalbital            | 0.734  | -0.707 |
| C17H19NO3      | DB00295 | Morphine              | 0.771  | -1.802 |
| C24H32O4       | DB00351 | Megestrol acetate     | 0.865  | 0.865  |
| C23H32N6O4S    | DB00862 | Vardenafil            | 0.967  | -0.884 |
| C53H72N2O12    | DB00565 | Cisatracurium         | 1.182  | 1.182  |
| C45H54N4O8     | DB00361 | Vinorelbine           | 1.345  | -0.09  |
| C22H23CIN2O2   | DB00455 | Loratadine            | 1.669  | -0.2   |
| C43H55N5O7     | DB00309 | Vindesine             | 1.894  | -0.666 |
| C66H75Cl2N9O24 | DB00512 | Vancomycin            | 1.899  | 0.769  |
| C70H92CIN17O14 | DB00050 | Cetorelix             | 1.981  | 1.976  |
| C62H111N11O12  | DB00091 | Ciclosporin           | 2.637  | 2.637  |
| C38H72N2O12    | DB00207 | Azithromycin          | 2.876  | 0.169  |
| C33H38N4O6     | DB00762 | Irinotecan            | 2.976  | 2.974  |
| C26H29N3O6     | DB00622 | Nicardipine           | 3.895  | 3.203  |

|            |         |             |       |       |
|------------|---------|-------------|-------|-------|
| C46H58N4O9 | DB00570 | Vinblastine | 4.289 | 3.421 |
| C46H58N4O9 | DB00570 | Vinblastine | 9.511 | 9.251 |

**paronomycin with 6vw1, Table S11**

| Entry Name           | PUBCHEM_COMPOUN | docking score | paronomycin with 6vw1, Table S11 |        |
|----------------------|-----------------|---------------|----------------------------------|--------|
|                      |                 |               | glide gscore                     |        |
| 6vw1.1               |                 |               |                                  |        |
| Conformer3D_CID_1655 | 165580          |               | -7.692                           | -8.775 |
| Conformer3D_CID_1655 | 165580          |               | -7.333                           | -9.449 |
| Conformer3D_CID_1655 | 165580          |               | -7.181                           | -7.811 |
| Conformer3D_CID_1655 | 165580          |               | -7.113                           | -8.858 |
| Conformer3D_CID_1655 | 165580          |               | -7.059                           | -8.497 |
| Conformer3D_CID_1655 | 165580          |               | -6.533                           | -8.723 |
| Conformer3D_CID_1655 | 165580          |               | -6.038                           | -7.027 |
| Conformer3D_CID_1655 | 165580          |               | -5.947                           | -7.797 |
| Conformer3D_CID_1655 | 165580          |               | -4.637                           | -6.883 |
| Conformer3D_CID_1655 | 165580          |               | -4.53                            | -7.135 |
| Conformer3D_CID_1655 | 165580          |               | -3.955                           | -6.356 |

**Paronomycin with 6y84, Table S12**

| Entry Name           | PUBCHEM_COMPOUN | docking score | glide gscore |         |
|----------------------|-----------------|---------------|--------------|---------|
|                      |                 |               |              |         |
| 6y84.1.1             |                 |               |              |         |
| Conformer3D_CID_1655 | 165580          |               | -9.553       | -10.543 |
| Conformer3D_CID_1655 | 165580          |               | -9.424       | -11.54  |
| Conformer3D_CID_1655 | 165580          |               | -8.115       | -10.305 |
| Conformer3D_CID_1655 | 165580          |               | -7.473       | -8.911  |
| Conformer3D_CID_1655 | 165580          |               | -6.544       | -9.149  |
| Conformer3D_CID_1655 | 165580          |               | -6.475       | -7.105  |
| Conformer3D_CID_1655 | 165580          |               | -6.196       | -8.046  |
| Conformer3D_CID_1655 | 165580          |               | -6.05        | -7.132  |
| Conformer3D_CID_1655 | 165580          |               | -5.57        | -7.971  |
| Conformer3D_CID_1655 | 165580          |               | -4.278       | -6.023  |
| Conformer3D_CID_1655 | 165580          |               | -1.77        | -4.016  |

Figure S1: Forms of Paramomycin

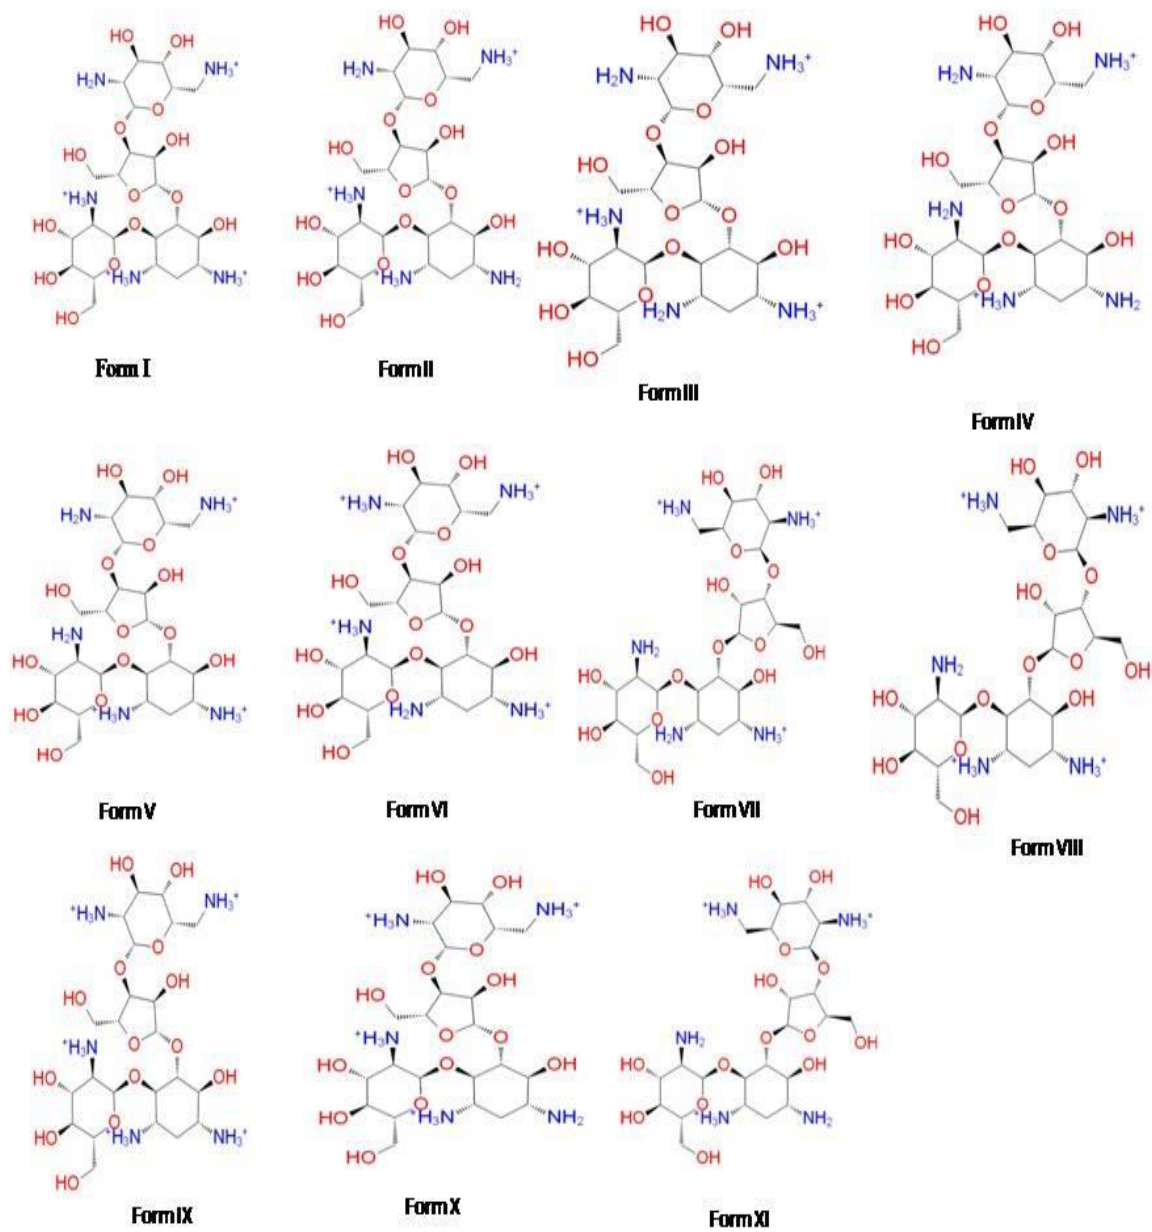

Supplement: mmc1.pdf [file mmc1.pdf]
